# Supplementary material for: The Effects of FreeSurfer Version, Workstation Type, and Macintosh Operating System Version on Anatomical Volume and Cortical Thickness Measurements
Source: PLoS One. 2012 Jun 1;7(6):e38234. doi: 10.1371/journal.pone.0038234 (PMC3365894; doi:10.1371/journal.pone.0038234)
Supplement: Table S1 — Detailed statistics of the voxel volume measurements. (XLS) [file pone.0038234.s003.xls]

## Sheet: Single vs single no-ran
Compare FS_RepeatSingle iMac v4.3.0_no_random_n30 with FS_RepeatSingle HP v4.3.1 no_random_n30 (13 vs. 14)
		Taken from aseg.stats and ?h.aparc.stats, i.e, corrected for partial volume effect																			Taken from aseg.mgz and wmparc.mgz, i.e, not corrected for partial volume effect
Struct	n	Mean1	sd1	Mean2	sd2	Mean diff	Mean diff %	sd Diff	sd Diff %	se Diff	se Diff %	min Diff	max Diff	min Diff %	max Diff %	median	ICC(1,1)	ICC(2,1)	t	p	nPairs	Mean1	sd1	Mean2	sd2	Mean diff	Mean diff %	sd Diff	sd Diff %	se Diff	se Diff %	min Diff	max Diff	min Diff %	max Diff %	median	ICC(1,1)	ICC(2,1)	SI	sd SI	se SI	OR	sd OR	se OR	t	p	F PV - noPV	pF
3rd-Ventricle	13	945.846	508.346	959.077	514.366	13.2308	1.38911	24.8836	2.61255	6.90146	0.72459	-36	76	-3.77968	7.97932	11	0.99857	0.99857	1.9171	0.07934	12	888.833	532.152	909.833	535.581	21	2.33506	28.1619	3.13142	8.12963	0.90396	1	103	0.11119	11.4529	13	0.99795	0.99795	0.96664	0.01894	0.00547	0.93544	0.03487	0.01006	2.58314	0.02545	1.13175	0.41531	**
4th-Ventricle	13	1806.62	540.266	1815.38	535.296	8.76923	0.48422	25.6423	1.41592	7.11188	0.3927	-32	72	-1.76698	3.9757	2	0.99882	0.99882	1.23304	0.24117	12	1590.25	474.699	1598.58	478.908	8.33333	0.52266	33.4184	2.09596	9.64705	0.60505	-48	86	-3.01051	5.39382	5	0.9976	0.9976	0.96143	0.02279	0.00658	0.92572	0.04195	0.01211	0.86382	0.40613	1.30325	0.32712
5th-Ventricle	13	6.46154	9.57092	7.61538	11.0645	1.15385	16.3934	2.82389	40.1208	0.78321	11.1275	-2	8	-28.4153	113.661	0	0.95945	0.95952	1.47323	0.16643	12	7.08333	9.52946	8	10.5744	0.91667	12.1547	2.81096	37.2724	0.81146	10.7596	-4	6	-53.0387	79.558	1	0.96013	0.96014	0.83978	0.33166	0.09574	0.72381	0.32052	0.09253	1.12966	0.28265	1.0046	0.50042
Brain-Stem	13	18251.7	2093.48	18218.4	2035.9	-33.3077	-0.18266	163.242	0.89521	45.2753	0.24829	-348	288	-1.90841	1.57938	-64	0.99699	0.99699	-0.73567	0.47607	12	18191.8	2172.72	18161.7	2096.49	-30.0833	-0.1655	151.503	0.8335	43.7352	0.24061	-239	260	-1.31487	1.4304	-38	0.99759	0.99759	0.978	0.00916	0.00264	0.95695	0.01752	0.00506	-0.68785	0.50579	1.07749	0.45423
CC_Anterior	13	949.308	180.139	951.923	179.676	2.61538	0.27513	14.379	1.5126	3.98802	0.41952	-29	32	-3.05066	3.36624	0	0.99695	0.99695	0.65581	0.52432	12	961.167	188.173	967.5	190.057	6.33333	0.65676	14.4117	1.49447	4.1603	0.43142	-11	42	-1.14068	4.35534	1.5	0.99678	0.99678	0.9669	0.05455	0.01575	0.93593	0.09111	0.0263	1.52233	0.15614	1.00227	0.49505
CC_Central	13	494.538	128.238	493.846	129.566	-0.69231	-0.14009	10.1356	2.05095	2.81111	0.56883	-30	12	-6.07051	2.4282	0	0.99713	0.99713	-0.24628	0.80963	12	512.917	138.379	511.75	139.785	-1.16667	-0.22772	11.5273	2.24996	3.32765	0.64951	-34	13	-6.6363	2.53741	0.5	0.99682	0.99682	0.96877	0.05222	0.01507	0.93943	0.09105	0.02628	-0.3506	0.73251	1.13731	0.41214
CC_Mid_Anterior	13	536.462	139.931	537.462	141.934	1	0.18623	7.22265	1.3451	2.0032	0.37306	-11	19	-2.04856	3.53843	1	0.99876	0.99876	0.4992	0.62666	12	554.667	152.014	554.167	151.357	-0.5	-0.09018	7.02593	1.26726	2.02821	0.36583	-15	10	-2.70555	1.8037	0.5	0.99901	0.99901	0.96062	0.05173	0.01493	0.92422	0.08954	0.02585	-0.24652	0.80982	1.028	0.4852
CC_Mid_Posterior	13	459.308	108.128	455.769	107.48	-3.53846	-0.77337	11.9067	2.60234	3.30232	0.72176	-34	17	-7.43107	3.71553	0	0.99383	0.99383	-1.07151	0.30502	12	487.25	118.008	482.833	117.825	-4.41667	-0.91057	11.7354	2.41946	3.38772	0.69844	-39	6	-8.04055	1.23701	0	0.99476	0.99476	0.96401	0.04805	0.01387	0.93051	0.08391	0.02422	-1.30373	0.21895	1.0146	0.49387
CC_Posterior	13	945.846	151.534	947.077	151.058	1.23077	0.13004	6.33974	0.66984	1.75833	0.18578	-9	12	-0.95091	1.26788	0	0.99916	0.99916	0.69997	0.49729	12	983.333	159.906	987.083	158.84	3.75	0.38063	7.17477	0.72825	2.07118	0.21023	-6	17	-0.60901	1.72552	2	0.99879	0.99879	0.97154	0.05084	0.01468	0.94465	0.08802	0.02541	1.81057	0.09758	1.13171	0.41533
CSF	13	1111.54	251.645	1105.08	252.587	-6.46154	-0.58301	19.2597	1.73776	5.34168	0.48197	-39	22	-3.51888	1.98501	-4	0.99698	0.99698	-1.20965	0.24971	12	1108.75	283.57	1103.67	281.035	-5.08333	-0.45953	17.9467	1.62236	5.18076	0.46833	-37	31	-3.34476	2.80237	-4.5	0.99799	0.99799	0.95439	0.01872	0.0054	0.91275	0.03454	0.00997	-0.98119	0.34758	1.07316	0.45687
Left-Accumbens-area	13	601.231	123.839	588	104.251	-13.2308	-2.2251	42.8644	7.20876	11.8885	1.99935	-59	101	-9.92238	16.9858	-22	0.92864	0.92869	-1.11291	0.28754	12	604.333	133.219	590.667	114.458	-13.6667	-2.28731	46.6794	7.81246	13.4752	2.25526	-63	116	-10.5439	19.4142	-22.5	0.9292	0.92921	0.90656	0.05506	0.0159	0.82908	0.08773	0.02532	-1.01421	0.33227	1.089	0.44036
Left-Amygdala	13	1796.15	315.059	1813.31	308.975	17.1538	0.95049	72.2563	4.00372	20.0403	1.11043	-97	171	-5.37476	9.4751	19	0.97373	0.97373	0.85597	0.40878	12	1835.75	325.364	1847.58	320.519	11.8333	0.64253	75.0876	4.07716	21.6759	1.17697	-99	165	-5.37557	8.95928	8.5	0.97453	0.97451	0.93312	0.03966	0.01145	0.87463	0.06423	0.01854	0.54592	0.59602	1.03918	0.47115
Left-Caudate	13	3885.46	660.915	3862.92	668.856	-22.5385	-0.58176	69.6594	1.79804	19.32	0.49869	-182	48	-4.69775	1.23897	-15	0.99436	0.99436	-1.16658	0.26604	12	4031	723.431	4005.83	729.091	-25.1667	-0.62628	73.409	1.82681	21.1913	0.52736	-172	66	-4.28029	1.64244	-11	0.99472	0.99472	0.96889	0.01455	0.0042	0.93966	0.02732	0.00789	-1.18759	0.26001	1.05383	0.46192
Left-Cerebellum-Cortex	13	48262.9	5924.45	48418.9	6064.35	156	0.32271	387.476	0.80155	107.466	0.22231	-349	748	-0.72196	1.54734	17	0.99773	0.99773	1.45162	0.17225	12	47706.2	6194.7	47821.5	6334.48	115.333	0.24147	421.377	0.88221	121.641	0.25467	-386	909	-0.80814	1.90311	14	0.99776	0.99776	0.96316	0.01764	0.00509	0.92894	0.03264	0.00942	0.94815	0.36342	1.08749	0.44127
Left-Cerebellum-White-Matter	13	16737.2	2639.12	16866.1	2575.91	128.923	0.76733	419.623	2.49752	116.383	0.69269	-739	865	-4.39839	5.14831	63	0.98683	0.98683	1.10775	0.28968	12	16562.3	2619.18	16676.2	2579.9	113.917	0.68545	482.418	2.90276	139.262	0.83795	-889	1038	-5.34921	6.24575	37.5	0.98325	0.98325	0.96746	0.01383	0.00399	0.93697	0.0261	0.00753	0.818	0.43072	1.14964	0.40519
Left-Cerebral-Cortex	13	265816	34816.1	266111	35569.1	294.462	0.11072	1681.44	0.63221	466.348	0.17534	-1910	4159	-0.71814	1.56375	-182	0.99891	0.99891	0.63142	0.53961	12	268167	36323.2	268348	36855	180.417	0.06726	1525.81	0.56879	440.465	0.16419	-1754	2973	-0.65385	1.10826	-173.5	0.99919	0.99919	0.97175	0.01556	0.00449	0.94504	0.02953	0.00852	0.40961	0.68996	1.102	0.43952
Left-Cerebral-White-Matter	13	212766	32366.7	213473	32473.1	707.154	0.33181	1353.6	0.63514	375.421	0.17615	-1231	2894	-0.57761	1.35792	14	0.99896	0.99896	1.88363	0.08407	12	208398	34187.4	209515	34292.9	1117.42	0.53476	1672.94	0.80062	482.936	0.23112	-368	4014	-0.17611	1.92097	50	0.99837	0.99837	0.98546	0.00863	0.00249	0.97133	0.01676	0.00484	2.3138	0.04102	1.23592	0.35944	**
Left-Hippocampus	13	3911.54	400.344	3896.46	427.576	-15.0769	-0.38619	86.8854	2.22555	24.0977	0.61726	-201	130	-5.14857	3.32992	-25	0.97902	0.97901	-0.62566	0.54326	12	4046.67	436.546	4021.42	461.027	-25.25	-0.62592	96.8918	2.40185	27.9703	0.69336	-201	129	-4.9826	3.19779	-24	0.97707	0.97706	0.94287	0.02214	0.00639	0.89192	0.03892	0.01123	-0.90274	0.386	1.11517	0.42488
Left-Inf-Lat-Vent	13	384.923	301.706	375.538	297.711	-9.38462	-2.46814	54.6253	14.3664	15.1503	3.98451	-146	92	-38.3977	24.1958	-2	0.98417	0.98417	-0.61943	0.54721	12	391.833	350.583	381.083	345.214	-10.75	-2.78167	63.0225	16.3077	18.193	4.70763	-164	113	-42.4367	29.2399	-5	0.98448	0.98447	0.87547	0.0471	0.0136	0.77852	0.07218	0.02084	-0.59089	0.56654	1.15372	0.40291
Left-Lateral-Ventricle	13	9272.54	7898.3	9299.31	7919.85	26.7692	0.28828	84.1161	0.90585	23.3296	0.25124	-75	221	-0.80767	2.37995	-3	0.99994	0.99994	1.14744	0.27356	12	9369.25	8355	9391.92	8383.59	22.6667	0.24163	100.052	1.06659	28.8826	0.3079	-106	265	-1.12999	2.82498	-0.5	0.99993	0.99993	0.98169	0.02181	0.0063	0.96404	0.04039	0.01166	0.78479	0.44915	1.18945	0.38346
Left-Pallidum	13	1601.77	442.171	1624.77	466.425	23	1.42568	73.0263	4.5266	20.2538	1.25545	-73	227	-4.52497	14.0708	16	0.9868	0.98681	1.13559	0.2783	12	1554.17	423.533	1574.42	452.21	20.25	1.29452	73.2047	4.67974	21.1324	1.35092	-67	214	-4.28309	13.6803	11.5	0.98613	0.98613	0.93674	0.056	0.01617	0.88101	0.0938	0.02708	0.95824	0.35853	1.00244	0.49493
Left-Putamen	13	6019	697.255	6071.92	662.487	52.9231	0.87542	95.3078	1.57652	26.4336	0.43725	-75	210	-1.2406	3.47368	21	0.98792	0.98794	2.00211	0.0684	12	6104.83	751.197	6153.58	716.72	48.75	0.79537	89.6175	1.46214	25.8703	0.42208	-52	198	-0.8484	3.23043	28	0.99097	0.99098	0.96791	0.01604	0.00463	0.93781	0.03008	0.00868	1.8844	0.08619	1.0635	0.46282
Left-Thalamus-Proper	13	6967.15	732.721	6990.85	749.735	23.6923	0.33948	111.472	1.59725	30.9168	0.443	-100	269	-1.43287	3.85442	25	0.98905	0.98905	0.76632	0.45829	12	7227.25	776.079	7240	795.895	12.75	0.17626	122.55	1.69416	35.377	0.48906	-132	283	-1.82481	3.91228	-9.5	0.98872	0.98872	0.97316	0.01084	0.00313	0.94773	0.02062	0.00595	0.3604	0.72537	1.09937	0.43417
Left-VentralDC	13	3797.69	419.902	3810.69	396.836	13	0.34173	70.2887	1.84766	19.4946	0.51245	-91	135	-2.3921	3.54872	15	0.98583	0.98582	0.66685	0.51748	12	3875.67	458.219	3882.75	437.156	7.08333	0.1826	67.0094	1.7274	19.344	0.49866	-87	122	-2.24273	3.14497	11	0.98961	0.9896	0.94699	0.02028	0.00585	0.89932	0.03697	0.01067	0.36618	0.72118	1.04894	0.47189
Left-WM-hypointensities	13	0	0	0	0	0	0	0	0	0	0	0	0	0	0	0	0	0	0	1	12	0	0	0	0	0	0	0	0	0	0	0	0	0	0	0	0	0	0	0	0	0	0	0	0	1	0	1
Left-choroid-plexus	13	1549.77	381.22	1557.15	370.095	7.38462	0.47537	91.0289	5.85974	25.2469	1.6252	-178	112	-11.4583	7.20971	34	0.97268	0.97266	0.2925	0.7749	12	1635.92	413.749	1638.83	387.499	2.91667	0.17813	86.0576	5.25582	24.8427	1.51723	-206	90	-12.5811	5.4966	38.5	0.97883	0.97881	0.88236	0.0473	0.01365	0.78948	0.07531	0.02174	0.11741	0.90866	1.05777	0.46637
Left-non-WM-hypointensities	13	0	0	0	0	0	0	0	0	0	0	0	0	0	0	0	0	0	0	1	12	0	0	0	0	0	0	0	0	0	0	0	0	0	0	0	0	0	0	0	0	0	0	0	0	1	0	1
Left-vessel	13	70.0769	29.2759	74.2308	32.2882	4.15385	5.75693	12.3818	17.1602	3.43408	4.75938	-9	40	-12.4733	55.4371	1	0.91654	0.91666	1.2096	0.24973	12	61.9167	29.8647	66.6667	32.8587	4.75	7.3882	11.2098	17.4358	3.23598	5.03329	-6	33	-9.33247	51.3286	1	0.93035	0.93056	0.88658	0.06139	0.01772	0.79627	0.09959	0.02875	1.46787	0.17014	1.10455	0.43801
Optic-Chiasm	13	157.154	89.2794	165.077	66.1393	7.92308	4.91764	67.9564	42.1787	18.8477	11.6983	-108	127	-67.0327	78.8255	1	0.64541	0.64111	0.42037	0.68164	12	169.333	95.4162	176	72.3351	6.66667	3.861	72.699	42.1037	20.9864	12.1543	-112	122	-64.8649	70.6564	0	0.6542	0.64929	0.77944	0.24764	0.07149	0.63859	0.27726	0.08004	0.31767	0.75669	1.06979	0.45204
Right-Accumbens-area	13	697.538	92.9504	673.385	113.005	-24.1538	-3.52373	44.3882	6.47566	12.3111	1.79602	-108	71	-15.7558	10.358	-37	0.88892	0.89002	-1.96196	0.07338	12	709.75	99.5126	693.75	116.666	-16	-2.28001	44.2452	6.30498	12.7725	1.82009	-95	81	-13.5376	11.5426	-19.5	0.91297	0.91314	0.91236	0.02419	0.00698	0.83885	0.0414	0.01195	-1.25269	0.23629	1.00323	0.50132
Right-Amygdala	13	1890.08	319.334	1888.69	347.288	-1.38462	-0.07328	90.6583	4.7983	25.1441	1.33081	-155	197	-8.20373	10.4267	1	0.96586	0.96581	-0.05507	0.95699	12	1914.58	323.821	1908.92	360.215	-5.66667	-0.29641	88.741	4.64187	25.6173	1.33999	-152	180	-7.95083	9.41546	-8.5	0.96905	0.96901	0.9442	0.01798	0.00519	0.89431	0.0324	0.00935	-0.2212	0.82899	1.02161	0.48932
Right-Caudate	13	4011.77	669.152	3971.92	666.671	-39.8462	-0.99819	55.4765	1.38975	15.3864	0.38545	-176	44	-4.40899	1.10225	-37	0.99504	0.99504	-2.5897	0.02367	12	4146.92	715.548	4098.25	696.171	-48.6667	-1.18049	76.4132	1.85353	22.0586	0.53507	-213	49	-5.16666	1.18858	-32.5	0.99226	0.99227	0.96622	0.01379	0.00398	0.93465	0.02597	0.0075	-2.20625	0.04954	1.3774	0.29477	**
Right-Cerebellum-Cortex	13	49008.6	6539.44	48934	6598.27	-74.6154	-0.15237	516.877	1.05547	143.356	0.29273	-1280	904	-2.61378	1.84598	-87	0.99708	0.99708	-0.52049	0.61219	12	48411.3	6619.31	48226.2	6704	-185.167	-0.38322	434.192	0.8986	125.341	0.2594	-1161	613	-2.40279	1.26866	-162.5	0.99767	0.99767	0.96548	0.01742	0.00503	0.93326	0.03236	0.00934	-1.47731	0.16764	1.19043	0.38983
Right-Cerebellum-White-Matter	13	16695.9	2390.37	16939	2485.3	243.077	1.44538	509.744	3.03104	141.377	0.84066	-167	1737	-0.99302	10.3285	56	0.9749	0.97494	1.71935	0.11121	12	16373	2449.22	16690.6	2527.1	317.583	1.92105	601.61	3.63911	173.67	1.05052	-162	1962	-0.97993	11.868	43	0.96517	0.96527	0.96606	0.01751	0.00505	0.93434	0.03261	0.00941	1.82866	0.09467	1.18022	0.3884
Right-Cerebral-Cortex	13	266850	36416.6	266344	36360	-506.077	-0.18983	2560.6	0.96048	710.182	0.26639	-7797	3580	-2.92464	1.34285	-260	0.99762	0.99762	-0.7126	0.48972	12	268444	36715	267472	36685	-972.667	-0.36299	2670.66	0.99667	770.954	0.28771	-8913	1478	-3.32627	0.55158	-332.5	0.99722	0.99722	0.97488	0.01364	0.00394	0.95099	0.02588	0.00747	-1.26164	0.23318	1.04298	0.46874
Right-Cerebral-White-Matter	13	214832	34273.3	214555	34053.9	-276.692	-0.12888	1018.44	0.47437	282.464	0.13157	-2736	1358	-1.27437	0.63253	13	0.99956	0.99956	-0.97957	0.34664	12	211200	36575.2	211112	36217.3	-88.25	-0.04179	1177	0.55741	339.77	0.16091	-3109	2254	-1.47237	1.06746	-16.5	0.99952	0.99952	0.98648	0.00814	0.00235	0.97332	0.01577	0.00455	-0.25973	0.79987	1.15569	0.40182
Right-Hippocampus	13	4112.62	448.698	4091.54	427.102	-21.0769	-0.51381	50.6301	1.23426	14.0423	0.34232	-125	41	-3.04724	0.99949	-13	0.99268	0.99268	-1.50096	0.15921	12	4246.83	469.217	4228.42	465.122	-18.4167	-0.4346	54.5118	1.28638	15.7362	0.37134	-106	68	-2.5014	1.60467	-9.5	0.99298	0.99298	0.95415	0.01544	0.00446	0.91232	0.02845	0.00821	-1.17034	0.2666	1.07667	0.44783
Right-Inf-Lat-Vent	13	309.154	145.21	304.231	137.097	-4.92308	-1.60522	29.7362	9.69579	8.24735	2.68913	-68	40	-22.1721	13.0424	-4	0.97891	0.9789	-0.59693	0.56165	12	300.75	164.833	297.25	156.525	-3.5	-1.17057	29.1158	9.73771	8.40499	2.81104	-55	41	-18.3946	13.7124	2	0.98471	0.98471	0.9189	0.04578	0.01322	0.84996	0.07358	0.02124	-0.41642	0.68511	1.02131	0.48951
Right-Lateral-Ventricle	13	6962.38	3905.18	6931.62	3888.89	-30.7692	-0.44291	57.5821	0.82888	15.9704	0.22989	-93	121	-1.33871	1.74176	-41	0.99987	0.99987	-1.92664	0.07804	12	7036.58	4107.6	7004	4093.54	-32.5833	-0.46413	59.3824	0.84587	17.1422	0.24418	-92	121	-1.31049	1.72358	-42	0.99987	0.99987	0.97706	0.01382	0.00399	0.95515	0.0258	0.00745	-1.90077	0.08384	1.03127	0.4762
Right-Pallidum	13	1478.38	305.677	1492.38	330.498	14	0.94252	41.8947	2.82046	11.6195	0.78226	-91	63	-6.12636	4.24133	17	0.99104	0.99104	1.20487	0.25148	12	1450.83	291.314	1457.67	324.719	6.83333	0.46989	51.0896	3.51313	14.7483	1.01415	-119	85	-8.18291	5.84494	11.5	0.98718	0.98717	0.92591	0.05602	0.01617	0.86204	0.09318	0.0269	0.46333	0.65216	1.21948	0.36777
Right-Putamen	13	5715.23	652.853	5764.54	647.548	49.3077	0.85904	92.128	1.60505	25.5517	0.44516	-67	274	-1.16727	4.77362	39	0.98787	0.98788	1.92972	0.07762	12	5793.17	719.899	5849.17	724.905	56	0.96201	106.932	1.83696	30.8687	0.53028	-84	277	-1.44301	4.7585	32	0.98697	0.98698	0.96457	0.01889	0.00545	0.93156	0.03507	0.01012	1.81413	0.097	1.16069	0.39905
Right-Thalamus-Proper	13	7146.08	803.723	7151.15	803.556	5.07692	0.07102	70.256	0.98279	19.4855	0.27258	-90	129	-1.25899	1.80455	13	0.99645	0.99645	0.26055	0.79886	12	7413.42	856.686	7398.42	850.594	-15	-0.20254	66.1706	0.89348	19.1018	0.25793	-104	82	-1.40428	1.10722	11.5	0.99709	0.99709	0.97737	0.00911	0.00263	0.95574	0.01743	0.00503	-0.78527	0.44888	1.06174	0.4639
Right-VentralDC	13	3739.85	385.401	3727.46	400.087	-12.3846	-0.3317	39.35	1.05393	10.9137	0.29231	-90	39	-2.41051	1.04455	-14	0.99487	0.99487	-1.13477	0.27863	12	3834.25	416.194	3823.58	429.858	-10.6667	-0.27858	42.8917	1.1202	12.3818	0.32338	-93	56	-2.42889	1.46255	-14	0.99497	0.99497	0.95123	0.01645	0.00475	0.90699	0.03028	0.00874	-0.86148	0.40736	1.09	0.43976
Right-WM-hypointensities	13	0	0	0	0	0	0	0	0	0	0	0	0	0	0	0	0	0	0	1	12	0	0	0	0	0	0	0	0	0	0	0	0	0	0	0	0	0	0	0	0	0	0	0	0	1	0	1
Right-choroid-plexus	13	1678	390.629	1697.08	408.52	19.0769	1.13046	69.3992	4.11245	19.2479	1.14059	-129	114	-7.64427	6.7554	16	0.98495	0.98494	0.99112	0.34119	12	1712.92	421.297	1731.67	428.37	18.75	1.08867	77.0715	4.47494	22.2486	1.2918	-142	107	-8.24483	6.21265	37	0.98394	0.98394	0.88888	0.03606	0.01041	0.79999	0.05768	0.01665	0.84275	0.41732	1.11055	0.42757
Right-non-WM-hypointensities	13	0	0	0	0	0	0	0	0	0	0	0	0	0	0	0	0	0	0	1	12	0	0	0	0	0	0	0	0	0	0	0	0	0	0	0	0	0	0	0	0	0	0	0	0	1	0	1
Right-vessel	13	59	36.1156	58.3077	35.3963	-0.69231	-1.18033	12.4525	21.2305	3.45369	5.88827	-39	14	-66.4918	23.8688	2	0.94371	0.94359	-0.20045	0.84448	12	46.9167	30.6726	47.75	31.0458	0.83333	1.76056	9.92548	20.9693	2.86524	6.05332	-24	19	-50.7042	40.1409	3	0.95213	0.95203	0.88732	0.10139	0.02927	0.79747	0.14693	0.04242	0.29084	0.77658	1.2546	0.35707
WM-hypointensities	13	1321.54	597.094	1454.31	688.567	132.769	9.56604	236.579	17.0455	65.6153	4.72759	-60	627	-4.32301	45.1754	27	0.91724	0.9179	2.02345	0.06588	12	1352	613.22	1506.08	703.524	154.083	10.7823	257.584	18.025	74.3582	5.20336	-77	685	-5.38823	47.9342	54.5	0.90392	0.9049	0.79453	0.0813	0.02347	0.6591	0.11594	0.03347	2.07218	0.06254	1.08879	0.44049
non-WM-hypointensities	13	12.3077	6.31644	13.9231	6.61389	1.61538	12.3167	5.15652	39.3166	1.43016	10.9045	-5	16	-38.1232	121.994	1	0.67644	0.67753	1.12951	0.28076	12	15.0833	6.17117	15.8333	6.67197	0.75	4.85175	4.02549	26.0409	1.16206	7.51736	-7	8	-45.283	51.752	1	0.81246	0.81156	0.60916	0.19134	0.05524	0.43798	0.22251	0.06423	0.64541	0.5319	1.28097	0.34437
lh_bankssts	13	2719	554.641	2775.77	642.361	56.7692	2.0663	265.213	9.65331	73.557	2.67735	-259	708	-9.42715	25.77	23	0.90524	0.90509	0.77177	0.45518	12	2620.25	541.691	2666.58	641.14	46.3333	1.75278	263.205	9.95701	75.9808	2.87434	-248	674	-9.3818	25.4973	-33.5	0.90657	0.90633	0.87308	0.03953	0.01141	0.77475	0.06119	0.01767	0.6098	0.55438	1.00763	0.49843
lh_caudalanteriorcingulate	13	2263.15	614.218	2280.38	668.442	17.2308	0.75847	135.288	5.95518	37.5222	1.65167	-177	199	-7.79128	8.75969	16	0.97912	0.97911	0.45922	0.65429	12	2125.83	597.496	2151.83	647.465	26	1.21562	123.591	5.77843	35.6776	1.66809	-144	200	-6.73264	9.35089	-3	0.98108	0.98108	0.8812	0.02214	0.00639	0.78764	0.03501	0.01011	0.72875	0.48138	1.09464	0.44389
lh_caudalmiddlefrontal	13	7426.46	1080.26	7404.15	1127.88	-22.3077	-0.30083	267.91	3.61293	74.3048	1.00205	-378	442	-5.09756	5.96064	-25	0.9726	0.97258	-0.30022	0.76915	12	7086.67	1079.8	7038	1112.17	-48.6667	-0.6891	272.904	3.86421	78.7805	1.1155	-427	444	-6.04616	6.28687	-81.5	0.97058	0.97056	0.9374	0.01379	0.00398	0.88218	0.02437	0.00703	-0.61775	0.54932	1.01864	0.48434
lh_cuneus	13	3195.46	450.997	3256.92	513.204	61.4615	1.90508	156.012	4.83578	43.2698	1.3412	-160	447	-4.95941	13.8553	43	0.94389	0.944	1.42043	0.18094	12	2928.75	444.999	2971.42	490.355	42.6667	1.44629	144.981	4.91447	41.8524	1.41869	-177	383	-5.99983	12.9827	14.5	0.95191	0.95191	0.86692	0.02644	0.00763	0.76511	0.04035	0.01165	1.01945	0.32989	1.07608	0.45509
lh_entorhinal	13	2059.62	477.777	2128.15	427.876	68.5385	3.27327	265.198	12.6654	73.5528	3.51274	-408	517	-19.4853	24.691	79	0.83061	0.83046	0.93183	0.36979	12	1872.08	457.996	1893.5	384.277	21.4167	1.1375	202.406	10.7503	58.4295	3.10334	-239	345	-12.6939	18.3239	16.5	0.89321	0.89276	0.82918	0.05918	0.01709	0.7082	0.08086	0.02334	0.36654	0.72092	1.31023	0.3308
lh_frontalpole	13	661.769	108.411	644.615	119.777	-17.1538	-2.62616	95.8043	14.6671	26.5713	4.06792	-178	151	-27.2508	23.1172	-19	0.66143	0.65872	-0.64558	0.5307	12	652.917	106.29	643.25	120.88	-9.66667	-1.49158	93.0995	14.3654	26.8755	4.14692	-166	148	-25.614	22.8366	-19.5	0.68593	0.68202	0.83104	0.05466	0.01578	0.71092	0.07907	0.02283	-0.35968	0.72589	1.02905	0.48452
lh_fusiform	13	9232.62	1919.42	9249.77	1936.2	17.1538	0.18562	318.196	3.44323	88.2517	0.95498	-457	663	-4.94525	7.1744	-92	0.98738	0.98737	0.19437	0.84913	12	8460.25	1772.61	8474.83	1727.7	14.5833	0.17223	351.382	4.14975	101.435	1.19793	-478	707	-5.64509	8.34953	-15.5	0.98148	0.98146	0.89657	0.02846	0.00822	0.81253	0.04451	0.01285	0.14377	0.88828	1.10429	0.43126
lh_inferiorparietal	13	13559.5	3120.8	13854.3	3538.18	294.769	2.15051	605.6	4.41821	167.963	1.22539	-420	2138	-3.06415	15.598	213	0.98091	0.98094	1.75496	0.10474	12	12599.8	3006.21	12876.9	3440.12	277.083	2.17519	626.134	4.91533	180.749	1.41893	-463	2103	-3.63469	16.5092	159.5	0.97913	0.97915	0.93571	0.01977	0.00571	0.87919	0.03361	0.0097	1.53297	0.15353	1.03391	0.47451
lh_inferiortemporal	13	9924.38	2098.75	10038.2	2155.49	113.769	1.13983	298.555	2.99115	82.8043	0.8296	-203	686	-2.03381	6.87287	121	0.98948	0.98949	1.37395	0.19458	12	9534.42	2116.34	9664.5	2177.85	130.083	1.35511	293.366	3.05606	84.6873	0.88221	-222	645	-2.31263	6.71913	141	0.98962	0.98962	0.90357	0.03474	0.01003	0.8241	0.0552	0.01594	1.53604	0.15278	1.01769	0.49186
lh_insula	13	6554.31	823.827	6577.31	811.42	23	0.3503	95.8262	1.45947	26.5774	0.40479	-126	205	-1.91903	3.12224	20	0.99326	0.99326	0.8654	0.40379	12	6278.42	861.247	6292.5	859.256	14.0833	0.22406	86.0259	1.36865	24.8335	0.39509	-102	182	-1.62279	2.89557	-1	0.99528	0.99528	0.93075	0.01663	0.0048	0.87046	0.02893	0.00835	0.56711	0.58203	1.11392	0.43251
lh_isthmuscingulate	13	2650.54	522.279	2780.15	562.657	129.615	4.77344	157.092	5.78532	43.5694	1.60456	-20	437	-0.73655	16.0937	56	0.93368	0.9345	2.97492	0.01159	12	2407.58	505	2502.42	505.811	94.8333	3.86286	163.33	6.65295	47.1493	1.92054	-111	402	-4.52138	16.3747	44.5	0.93496	0.93539	0.85849	0.02798	0.00808	0.75206	0.04227	0.0122	2.01134	0.06944	1.03971	0.47081	**
lh_lateraloccipital	13	13086.1	2545.55	12701.9	2202.64	-384.154	-2.97932	693.574	5.37904	192.363	1.49188	-2557	70	-19.8309	0.54289	-144	0.94804	0.94829	-1.99703	0.06901	12	12190.6	2387.24	11819.2	2056.35	-371.417	-3.09388	684.727	5.70375	197.664	1.64653	-2406	36	-20.0419	0.29988	-75	0.9431	0.94338	0.91413	0.03006	0.00868	0.84184	0.04909	0.01417	-1.87903	0.08698	1.01292	0.49497
lh_lateralorbitofrontal	13	8526.15	1110.13	8454.62	1163.36	-71.5385	-0.84258	217.233	2.55858	60.2497	0.70962	-455	189	-5.359	2.22605	-36	0.98118	0.98119	-1.18737	0.25806	12	8248.33	1125.17	8210.25	1168.1	-38.0833	-0.46278	178.059	2.16372	51.4012	0.62461	-339	194	-4.11943	2.35743	15	0.9884	0.98839	0.92554	0.01338	0.00386	0.86139	0.02306	0.00666	-0.7409	0.47427	1.22001	0.3744
lh_lingual	13	7293.92	1456.52	7322.31	1412.72	28.3846	0.3884	245.798	3.36335	68.172	0.93283	-326	645	-4.46079	8.8258	-73	0.98625	0.98625	0.41637	0.68449	12	6725.25	1331.22	6782.5	1291.66	57.25	0.84766	244.706	3.62319	70.6405	1.04593	-309	634	-4.57515	9.3872	29.5	0.98309	0.98308	0.88524	0.02911	0.0084	0.79412	0.04552	0.01314	0.81044	0.43487	1.00446	0.50051
lh_medialorbitofrontal	13	4680.54	732.561	4653.38	692.374	-27.1538	-0.58183	338.022	7.24287	93.7504	2.00881	-605	499	-12.9635	10.6922	27	0.89505	0.89463	-0.28964	0.77704	12	4488.58	663.089	4444.75	652.395	-43.8333	-0.98134	301.934	6.75972	87.1608	1.95136	-566	452	-12.6716	10.1194	-27.5	0.90088	0.90055	0.88716	0.02691	0.00777	0.79721	0.04304	0.01242	-0.5029	0.62495	1.11952	0.42925
lh_middletemporal	13	11091.6	1866.09	10977.8	1982.99	-113.846	-1.03171	333.467	3.02198	92.487	0.83815	-793	330	-7.18643	2.99057	27	0.98441	0.98442	-1.23094	0.24193	12	10745.1	1853.2	10610.2	1997.24	-134.917	-1.26355	355.503	3.32942	102.625	0.96112	-804	358	-7.52976	3.35281	-34	0.98195	0.98196	0.91935	0.01658	0.00479	0.85074	0.02814	0.00812	-1.31466	0.21537	1.06608	0.45432
lh_paracentral	13	3949.46	607.947	3906.15	640.168	-43.3077	-1.10259	268.314	6.83115	74.417	1.89462	-804	195	-20.4694	4.9646	49	0.91212	0.91192	-0.58196	0.57137	12	3855.83	588.765	3810.58	615.388	-45.25	-1.18047	273.068	7.12376	78.8281	2.05645	-793	164	-20.6876	4.2784	58	0.90266	0.90238	0.9136	0.03384	0.00977	0.84093	0.05413	0.01563	-0.57403	0.57749	1.01772	0.48494
lh_parahippocampal	13	2514.15	457.724	2576.31	433.655	62.1538	2.44197	280.336	11.0142	77.7513	3.05478	-203	850	-7.9757	33.3958	10	0.80729	0.80676	0.79939	0.4396	12	2312.92	443.304	2358.92	440.429	46	1.96925	266.569	11.4118	76.9519	3.29429	-245	748	-10.4884	32.0217	-54.5	0.82693	0.82608	0.83686	0.08904	0.0257	0.71948	0.11566	0.03339	0.59778	0.56209	1.05165	0.47019
lh_parsopercularis	13	5388.31	562.272	5379.23	556.233	-9.07692	-0.1686	99.9962	1.85736	27.734	0.51514	-190	110	-3.52913	2.04318	37	0.9851	0.9851	-0.32729	0.74909	12	5161.42	561.98	5142	555.076	-19.4167	-0.3769	78.1775	1.51751	22.5679	0.43807	-146	107	-2.83401	2.07698	-8.5	0.99042	0.99041	0.92948	0.01282	0.0037	0.86825	0.02229	0.00643	-0.86037	0.40795	1.27909	0.34526
lh_parsorbitalis	13	2493.15	656.521	2468.69	542.866	-24.4615	-0.98599	184.249	7.42664	51.1015	2.05978	-424	344	-17.0904	13.8658	-1	0.95593	0.95587	-0.47869	0.64077	12	2473.33	676.426	2444.75	556.186	-28.5833	-1.16238	188.797	7.67766	54.501	2.21635	-430	354	-17.4865	14.3958	-42	0.95627	0.95621	0.90432	0.03455	0.00997	0.82534	0.0566	0.01634	-0.52446	0.61037	1.02468	0.48043
lh_parstriangularis	13	4018.08	834.726	3978.85	774.789	-39.2308	-0.98115	192.427	4.81252	53.3696	1.33475	-341	280	-8.52828	7.00269	-97	0.97245	0.97243	-0.73508	0.47641	12	3952.25	797.641	3921.5	694.841	-30.75	-0.78108	202.511	5.14396	58.4599	1.48493	-342	291	-8.68709	7.39165	-60	0.96552	0.96548	0.9172	0.01552	0.00448	0.84707	0.02669	0.0077	-0.526	0.60933	1.05241	0.46281
lh_pericalcarine	13	2258.46	381.5	2307.15	501.74	48.6923	2.133	268.28	11.7522	74.4073	3.25947	-537	574	-23.5237	25.1445	23	0.82611	0.82541	0.6544	0.5252	12	2096.75	377.207	2131.17	477.736	34.4167	1.62807	260.419	12.319	75.1766	3.5562	-504	550	-23.8415	26.0175	6	0.82798	0.82693	0.83623	0.0576	0.01663	0.71855	0.08385	0.0242	0.45781	0.656	1.03018	0.4838
lh_postcentral	13	11376.8	1748.25	11333.8	1767.35	-42.9231	-0.378	129.997	1.14481	36.0547	0.31751	-299	90	-2.63313	0.79258	11	0.99718	0.99718	-1.1905	0.25687	12	10775	1749.01	10758.8	1771.32	-16.25	-0.15093	107.023	0.99401	30.895	0.28695	-221	106	-2.05259	0.9845	18.5	0.99826	0.99826	0.94361	0.01444	0.00417	0.89324	0.02555	0.00738	-0.52597	0.60935	1.21466	0.37715
lh_posteriorcingulate	13	4244.31	903.861	4185.62	911.093	-58.6923	-1.39248	162.996	3.86707	45.2068	1.07253	-343	205	-8.13768	4.86363	-51	0.98303	0.98303	-1.29831	0.21858	12	3904.5	874.161	3845.83	884.606	-58.6667	-1.51391	174.203	4.49538	50.2882	1.2977	-351	197	-9.05767	5.08365	-29	0.9798	0.9798	0.88254	0.02226	0.00643	0.78978	0.03576	0.01032	-1.16661	0.26804	1.06876	0.45267
lh_precentral	13	14889.5	2075.76	14949.7	1972.32	60.2308	0.4037	242.871	1.62787	67.3602	0.45149	-397	678	-2.66093	4.54436	13	0.99292	0.99292	0.89416	0.38882	12	14456.3	2069.61	14526.1	1966.38	69.75	0.48133	266.527	1.83923	76.9398	0.53094	-327	746	-2.25654	5.14795	4	0.99141	0.99141	0.95142	0.01078	0.00311	0.90733	0.0194	0.0056	0.90655	0.38407	1.0974	0.43534
lh_precuneus	13	11180.4	1456.31	10909.3	1542.78	-271.077	-2.45433	387.373	3.50727	107.438	0.97274	-1223	79	-11.073	0.71527	-82	0.95322	0.95354	-2.5231	0.02676	12	10397.6	1373.85	10158.3	1502.69	-239.25	-2.3278	376.256	3.66081	108.616	1.05678	-1135	133	-11.043	1.29403	-145	0.95513	0.95538	0.92371	0.01786	0.00515	0.85823	0.03045	0.00879	-2.20272	0.04985	1.02955	0.48421	**
lh_rostralanteriorcingulate	13	2482	622.337	2478.38	637.661	-3.61538	-0.14577	83.517	3.36736	23.1635	0.93394	-143	149	-5.76568	6.0076	-9	0.99187	0.99187	-0.15608	0.87856	12	2333.33	609.66	2323.42	634.347	-9.91667	-0.42591	77.3921	3.32387	22.3412	0.95952	-126	135	-5.4115	5.79804	-13.5	0.99278	0.99278	0.89028	0.01543	0.00446	0.80226	0.0251	0.00725	-0.44387	0.66574	1.07914	0.45323
lh_rostralmiddlefrontal	13	16849.8	4131.02	16831.9	4189.43	-17.8462	-0.10597	309.405	1.83723	85.8135	0.50956	-670	549	-3.97842	3.25993	60	0.99744	0.99744	-0.20796	0.83874	12	16411.8	4153.84	16387.3	4195.17	-24.4167	-0.14889	314.987	1.92071	90.929	0.55446	-665	523	-4.05499	3.18911	25.5	0.99737	0.99737	0.94218	0.01161	0.00335	0.89067	0.02061	0.00595	-0.26852	0.79326	1.01804	0.48473
lh_superiorfrontal	13	24773.8	2913.82	24923.8	3008.94	149.923	0.60334	451.266	1.81604	125.159	0.50368	-368	1253	-1.48096	5.0425	67	0.98801	0.98801	1.19787	0.25409	12	23931.5	2875.06	24057.2	2940.31	125.75	0.52408	413.117	1.72172	119.257	0.49702	-321	1129	-1.33781	4.70527	18.5	0.98981	0.98982	0.95064	0.0112	0.00323	0.90592	0.02021	0.00583	1.05445	0.31429	1.09234	0.44526
lh_superiorparietal	13	15726.8	1991.97	15974.3	2109.68	247.538	1.5617	462.953	2.92074	128.4	0.81007	-298	1188	-1.88006	7.49501	125	0.9693	0.96938	1.92787	0.07787	12	14671.2	1558.12	14841	1695.54	169.833	1.15094	408.921	2.77121	118.045	0.79998	-270	1115	-1.82975	7.55621	59.5	0.9657	0.96575	0.9428	0.01391	0.00401	0.89179	0.02468	0.00712	1.43871	0.17807	1.13213	0.42199
lh_superiortemporal	13	12496.1	1450.16	12364.2	1396.14	-131.846	-1.0607	178.945	1.4396	49.6303	0.39927	-444	143	-3.57196	1.15043	-130	0.98844	0.98846	-2.65657	0.02092	12	12095.6	1480.54	11957.1	1426.14	-138.5	-1.15164	177.405	1.47514	51.2124	0.42584	-453	126	-3.76673	1.0477	-133.5	0.98866	0.98868	0.92952	0.01811	0.00523	0.86833	0.03135	0.00905	-2.70443	0.02049	1.00868	0.49774	**
lh_supramarginal	13	11901.6	1698.23	11767.7	1612	-133.923	-1.13162	335.478	2.83471	93.0447	0.78621	-797	348	-6.73446	2.94052	-120	0.9778	0.97782	-1.43934	0.17563	12	11267.8	1654.92	11167	1573.3	-100.75	-0.89816	333.097	2.96947	96.1567	0.85721	-784	369	-6.98916	3.28954	-34.5	0.97855	0.97855	0.93787	0.01377	0.00398	0.88301	0.02435	0.00703	-1.04777	0.31722	1.00715	0.49874
lh_temporalpole	13	2044.31	321.366	2015.31	379.05	-29	-1.42871	126.878	6.25073	35.1896	1.73364	-325	184	-16.0114	9.0649	-16	0.93637	0.93632	-0.82411	0.42596	12	2022.33	327.517	1995.08	369.813	-27.25	-1.35659	135.615	6.75133	39.1485	1.94894	-317	149	-15.7813	7.4177	-16.5	0.92776	0.92764	0.87307	0.03186	0.0092	0.77474	0.04989	0.0144	-0.69607	0.50083	1.06886	0.45261
lh_transversetemporal	13	1319.54	288.419	1334.54	282.686	15	1.13034	86.0155	6.48176	23.8564	1.79772	-141	149	-10.6252	11.228	37	0.9567	0.95665	0.62876	0.54129	12	1211.5	250.542	1218.67	213.462	7.16667	0.58981	77.3303	6.36419	22.3233	1.83718	-138	114	-11.3573	9.38207	25	0.94882	0.94872	0.87751	0.03468	0.01001	0.78176	0.05515	0.01592	0.32104	0.7542	1.11231	0.43345
lh_unknown	13	7146.92	1124.13	6852.85	981.661	-294.077	-4.20117	559.268	7.98968	155.113	2.21594	-1271	414	-18.1574	5.91438	-49	0.83387	0.83614	-1.89589	0.08231	12	3382.08	847.773	3078.08	780.377	-304	-9.41152	406.292	12.5784	117.286	3.63107	-1172	97	-36.2839	3.00302	-109	0.82171	0.82669	0.73435	0.05972	0.01724	0.58021	0.07371	0.02128	-2.59194	0.02505	1.37652	0.30197	**
rh_bankssts	13	2633	392.602	2647.92	373.638	14.9231	0.56517	195.076	7.38796	54.1044	2.04905	-198	543	-7.49869	20.5646	-18	0.8791	0.87854	0.27582	0.78738	12	2529.08	379.062	2551.08	340.639	22	0.86611	193.363	7.61247	55.8191	2.19753	-206	529	-8.10997	20.8261	-17	0.86549	0.8648	0.88409	0.03953	0.01141	0.79226	0.06186	0.01786	0.39413	0.70102	1.00886	0.49762
rh_caudalanteriorcingulate	13	2305.85	680.997	2424.54	777.518	118.692	5.01829	196.298	8.29947	54.4434	2.30186	-145	671	-6.13058	28.3698	68	0.95376	0.954	2.18011	0.04988	12	2191.83	684.842	2301.33	776.677	109.5	4.87407	200.346	8.91782	57.835	2.57435	-171	625	-7.61156	27.82	54.5	0.95469	0.95487	0.8839	0.0298	0.0086	0.79195	0.04729	0.01365	1.89332	0.0849	1.02062	0.48305	**
rh_caudalmiddlefrontal	13	6927.08	1147.99	6817.77	1190.02	-109.308	-1.59053	280.371	4.07966	77.761	1.13149	-892	243	-12.9794	3.53587	-91	0.96912	0.96916	-1.40569	0.18518	12	6444.75	1058.53	6346.67	1106.04	-98.0833	-1.53358	281.751	4.40531	81.3344	1.2717	-867	213	-13.556	3.33036	-87.5	0.96487	0.96489	0.93554	0.0186	0.00537	0.87888	0.03224	0.00931	-1.20593	0.25314	1.00492	0.4933
rh_cuneus	13	3267.23	621.547	3285.23	580.201	18	0.54941	109.588	3.34494	30.3942	0.92772	-153	213	-4.67	6.50137	64	0.98421	0.9842	0.59222	0.5647	12	3080.42	578.331	3073.67	550.302	-6.75	-0.21937	97.8822	3.18105	28.2562	0.91829	-149	151	-4.84231	4.90731	16.5	0.98614	0.98613	0.85894	0.02663	0.00769	0.75276	0.04095	0.01182	-0.23889	0.81559	1.11959	0.42921
rh_entorhinal	13	1776.08	370.912	1847.31	367.84	71.2308	3.93173	173.323	9.56691	48.0712	2.65338	-279	318	-15.4	17.5526	112	0.88039	0.88099	1.48178	0.16418	12	1619.08	396.338	1694.25	417.167	75.1667	4.53722	162.36	9.80042	46.8694	2.82914	-238	294	-14.3662	17.7465	112.5	0.91042	0.91089	0.8161	0.06895	0.0199	0.68933	0.09031	0.02607	1.60375	0.13707	1.06752	0.46034
rh_frontalpole	13	888.615	166.442	939.692	193.792	51.0769	5.58734	141.44	15.4723	39.2285	4.29124	-99	436	-10.8297	47.6944	26	0.67967	0.68226	1.30204	0.21734	12	889.75	175.948	937.083	200.609	47.3333	5.18201	149.362	16.3521	43.1172	4.72043	-90	445	-9.85312	48.7182	-3	0.68217	0.68302	0.83751	0.06844	0.01976	0.72045	0.09382	0.02708	1.09778	0.29575	1.05601	0.46056
rh_fusiform	13	9576.23	1567.23	9842.15	1652.36	265.923	2.73888	359.602	3.70372	99.7355	1.02723	-359	947	-3.69753	9.75364	197	0.96356	0.96378	2.66628	0.02055	12	8843.33	1459.96	9073	1529.37	229.667	2.56377	310.784	3.46928	89.7156	1.00149	-336	793	-3.75077	8.85226	169.5	0.96855	0.96871	0.88894	0.03801	0.01097	0.80008	0.05825	0.01681	2.55994	0.02652	1.15708	0.40795	**
rh_inferiorparietal	13	16454	3143.51	16890.6	3356.64	436.615	2.61881	527.917	3.16643	146.418	0.87821	-365	1238	-2.18926	7.42549	429	0.97891	0.97899	2.98198	0.01144	12	15367.9	2918.42	15763.9	3183.76	396	2.54402	513.047	3.29597	148.104	0.95146	-336	1145	-2.15856	7.35581	357	0.97874	0.97881	0.93699	0.01161	0.00335	0.88146	0.02052	0.00592	2.6738	0.02165	1.02898	0.48457	**
rh_inferiortemporal	13	10308.6	3270.84	9977.92	3134.38	-330.692	-3.26021	904.229	8.91457	250.788	2.47246	-2667	548	-26.2933	5.4026	10	0.95794	0.95799	-1.31861	0.21191	12	9795.67	3274.32	9441.75	3111.03	-353.917	-3.67946	852.302	8.86088	246.038	2.55792	-2449	519	-25.4608	5.39573	-4.5	0.96128	0.96134	0.89426	0.04159	0.01201	0.80875	0.06421	0.01854	-1.43846	0.17814	1.06093	0.46441
rh_insula	13	6362.15	863.885	6374.85	899.603	12.6923	0.1993	160.118	2.51422	44.4087	0.69732	-251	305	-3.94127	4.7892	-20	0.98467	0.98467	0.28581	0.7799	12	6052.75	876.324	6057.75	908.846	5	0.08257	130.73	2.15895	37.7385	0.62324	-194	219	-3.20383	3.6167	-21.5	0.99015	0.99015	0.92229	0.01837	0.0053	0.85578	0.03166	0.00914	0.13249	0.89699	1.2248	0.37195
rh_isthmuscingulate	13	2608.38	546.277	2627.23	545.505	18.8462	0.71992	114.264	4.36488	31.6912	1.2106	-164	293	-6.26478	11.1926	2	0.97917	0.97916	0.59468	0.5631	12	2420.83	521.342	2444.08	497.827	23.25	0.95582	122.072	5.01848	35.2392	1.44871	-138	302	-5.67327	12.4154	-13.5	0.97265	0.97264	0.85983	0.02189	0.00632	0.75412	0.03323	0.00959	0.65978	0.52297	1.06833	0.45293
rh_lateraloccipital	13	12223.2	2466.79	12314.8	2376.78	91.5385	0.7461	510.284	4.15913	141.527	1.15354	-526	1570	-4.28723	12.7965	-17	0.97879	0.97878	0.64679	0.52995	12	11410.2	2234.02	11503.5	2132.16	93.3333	0.81465	493.326	4.30595	142.411	1.24302	-460	1503	-4.01507	13.1188	30	0.97568	0.97566	0.90706	0.03019	0.00871	0.82992	0.04917	0.0142	0.65538	0.52569	1.03437	0.48112
rh_lateralorbitofrontal	13	8046.08	999.541	8089.15	1018.62	43.0769	0.53395	190.951	2.36689	52.9604	0.65646	-311	340	-3.85492	4.21438	91	0.98256	0.98255	0.81338	0.43184	12	7837	965.529	7859.58	1003.39	22.5833	0.28775	164.252	2.09283	47.4154	0.60415	-260	223	-3.31282	2.84138	80	0.98698	0.98697	0.92348	0.01366	0.00394	0.85784	0.02349	0.00678	0.47629	0.64319	1.16255	0.40492
rh_lingual	13	6920.85	1202.88	6910.23	1164.1	-10.6154	-0.1535	315.087	4.55621	87.3893	1.26367	-806	454	-11.6549	6.56493	29	0.96721	0.96717	-0.12147	0.90533	12	6488.25	1163.62	6435.42	1071.19	-52.8333	-0.81762	296.524	4.58885	85.5991	1.32469	-735	360	-11.3745	5.57117	11	0.96663	0.9666	0.87852	0.03167	0.00914	0.78335	0.04928	0.01423	-0.61722	0.54965	1.0626	0.46337
rh_medialorbitofrontal	13	4894.23	969.231	4758.85	1116.01	-135.385	-2.805	385.83	7.99392	107.01	2.21711	-932	709	-19.3099	14.6896	-163	0.92883	0.92894	-1.26516	0.22983	12	4740.92	964.734	4610.58	1116.85	-130.333	-2.78743	370.718	7.92852	107.017	2.28877	-829	641	-17.7298	13.709	-216.5	0.93444	0.93453	0.89595	0.02802	0.00809	0.81152	0.04503	0.013	-1.21787	0.24875	1.04076	0.47705
rh_middletemporal	13	11780.3	1716.82	11831.9	2032.97	51.6154	0.43719	594.034	5.03158	164.755	1.39551	-543	1879	-4.59931	15.9155	-20	0.95354	0.95346	0.31329	0.75944	12	11015.2	1642.46	11064.8	1976.18	49.5833	0.44913	581.568	5.26784	167.884	1.5207	-514	1751	-4.65581	15.8606	-42	0.95258	0.95249	0.9062	0.03644	0.01052	0.82849	0.0588	0.01697	0.29534	0.77323	1.02143	0.48943
rh_paracentral	13	4784.15	709.796	4885.15	605.301	101	2.08908	219.661	4.54348	60.9231	1.26013	-141	611	-2.91644	12.6379	36	0.93733	0.93756	1.65783	0.12324	12	4706.75	696.821	4800.67	591.151	93.9167	1.97565	223.046	4.69205	64.388	1.35448	-124	561	-2.60849	11.8013	13.5	0.935	0.93519	0.91718	0.02424	0.007	0.84703	0.04068	0.01174	1.45861	0.17263	1.01541	0.48644
rh_parahippocampal	13	2353.85	301.209	2365.08	301.859	11.2308	0.47599	128.754	5.45691	35.7099	1.51348	-210	168	-8.90034	7.12027	32	0.91489	0.91462	0.3145	0.75854	12	2217.67	296.869	2200.92	279.307	-16.75	-0.75816	114.098	5.16447	32.9373	1.49085	-191	134	-8.6453	6.06529	-5.5	0.92631	0.92613	0.86668	0.03645	0.01052	0.76473	0.0552	0.01593	-0.50854	0.62112	1.12845	0.4241
rh_parsopercularis	13	4329	1020.79	4336.85	984.23	7.84615	0.18108	256.436	5.91832	71.1226	1.64145	-681	448	-15.7169	10.3394	46	0.96974	0.96971	0.11032	0.91398	12	4026.83	923.406	4086.33	957.687	59.5	1.46675	141.996	3.5004	40.9909	1.01048	-166	402	-4.09211	9.90982	52	0.98756	0.98757	0.92021	0.01621	0.00468	0.85222	0.0279	0.00805	1.45154	0.17454	1.80593	0.16847
rh_parsorbitalis	13	2879.85	411.078	2902.15	398.341	22.3077	0.77163	131.108	4.53503	36.3627	1.25779	-119	361	-4.11622	12.487	-38	0.94999	0.94993	0.61348	0.55101	12	2792.25	413.347	2809.83	403.188	17.5833	0.62774	135.957	4.8538	39.2474	1.40117	-105	367	-3.74861	13.1023	-42	0.94816	0.94806	0.91198	0.01464	0.00423	0.83821	0.0245	0.00707	0.44801	0.66284	1.03699	0.47255
rh_parstriangularis	13	4433.38	830.033	4478	854.355	44.6154	1.00131	86.6694	1.94514	24.0378	0.53948	-78	179	-1.75057	4.01733	43	0.99371	0.99372	1.85605	0.08816	12	4191.08	807.415	4225.5	835.378	34.4167	0.81783	84.2501	2.002	24.3209	0.57793	-90	154	-2.13864	3.65944	37	0.9943	0.9943	0.92852	0.01535	0.00443	0.86658	0.02693	0.00777	1.41511	0.18472	1.02872	0.48474
rh_pericalcarine	13	2796.77	564.867	2769	574.449	-27.7692	-0.99786	131.58	4.7282	36.4938	1.31137	-193	192	-6.93525	6.89932	-25	0.97418	0.97417	-0.76093	0.46139	12	2587.92	523.7	2574.83	523.442	-13.0833	-0.50684	119.015	4.61054	34.3567	1.33095	-158	172	-6.12077	6.66312	-39	0.97598	0.97596	0.85132	0.03035	0.00876	0.74113	0.0455	0.01314	-0.38081	0.7106	1.10557	0.4374
rh_postcentral	13	10681	1737.16	10793	1714.08	112	1.04312	372.412	3.46849	103.289	0.96199	-577	751	-5.37394	6.9945	106	0.9764	0.97641	1.08434	0.29952	12	10115.8	1755.7	10231.7	1727.16	115.833	1.13855	338.868	3.33081	97.8229	0.96152	-453	620	-4.45264	6.09411	91.5	0.98044	0.98045	0.92985	0.01293	0.00373	0.8689	0.02222	0.00641	1.18411	0.26132	1.09899	0.4413
rh_posteriorcingulate	13	3846.38	757.604	3920.92	875.316	74.5385	1.91929	172.595	4.44413	47.8692	1.23258	-386	299	-9.93909	7.69894	96	0.97537	0.9754	1.55713	0.14541	12	3557.33	718.13	3623.83	845.097	66.5	1.85207	178.223	4.96363	51.4486	1.43288	-361	333	-10.0541	9.27426	95.5	0.97275	0.97277	0.88442	0.0248	0.00716	0.79279	0.03895	0.01124	1.29255	0.22266	1.03261	0.47534
rh_precentral	13	14391.7	1844.24	14405	1724.61	13.3077	0.09243	301.844	2.09638	83.7166	0.58143	-582	465	-4.04213	3.22954	6	0.98677	0.98677	0.15896	0.87634	12	13989.2	1816.98	13961.7	1694.45	-27.5	-0.19677	284.369	2.03478	82.0902	0.58739	-540	457	-3.86393	3.27003	-15.5	0.98786	0.98786	0.94745	0.00831	0.0024	0.90015	0.01497	0.00432	-0.335	0.74393	1.06145	0.46408
rh_precuneus	13	11508.2	1997.26	11522.2	1862.27	14	0.12158	304.977	2.64848	84.5853	0.73456	-670	410	-5.81842	3.56053	31	0.98845	0.98845	0.16551	0.8713	12	10861	1930.43	10881.6	1824.76	20.5833	0.18934	276.654	2.54481	79.863	0.73462	-549	408	-5.05	3.753	21.5	0.98999	0.98999	0.91781	0.00744	0.00215	0.8481	0.0127	0.00367	0.25773	0.80137	1.10238	0.43929
rh_rostralanteriorcingulate	13	1890.69	420.144	1868.69	390.215	-22	-1.1704	164.686	8.76133	45.6757	2.42996	-490	258	-26.0681	13.7256	0	0.92219	0.922	-0.48166	0.63871	12	1771.08	433.016	1737.92	404.311	-33.1667	-1.89038	166.114	9.46787	47.9529	2.73314	-479	240	-27.3012	13.6791	-17	0.92467	0.92454	0.86492	0.04304	0.01242	0.76199	0.06477	0.0187	-0.69165	0.50349	1.00867	0.49084
rh_rostralmiddlefrontal	13	17989.7	3990.46	17982.4	3809.45	-7.30769	-0.04063	424.178	2.35837	117.646	0.6541	-695	673	-3.86411	3.74179	-39	0.99454	0.99454	-0.06212	0.95149	12	17574.8	3848.48	17525.2	3711.04	-49.5833	-0.28253	372.47	2.12234	107.523	0.61267	-641	508	-3.65243	2.89459	-68	0.99546	0.99546	0.93844	0.01016	0.00293	0.88401	0.01808	0.00522	-0.46114	0.65368	1.13882	0.41818
rh_superiorfrontal	13	24845.8	4038.14	24949.4	4086.33	103.615	0.41617	313.326	1.25846	86.901	0.34903	-480	621	-1.9279	2.49422	114	0.99693	0.99693	1.19234	0.25617	12	24184.4	3989.15	24248.8	4033.55	64.4167	0.266	308.902	1.27558	89.1722	0.36823	-487	598	-2.01102	2.46938	70	0.99715	0.99715	0.9504	0.00873	0.00252	0.9055	0.01581	0.00456	0.72238	0.48513	1.01432	0.49405
rh_superiorparietal	13	15506.2	2378.68	15556.7	2576.96	50.4615	0.3249	431.655	2.77923	119.72	0.77082	-996	1078	-6.41279	6.94075	56	0.9858	0.98579	0.4215	0.68084	12	14286.9	2169.54	14326.1	2376.57	39.1667	0.27377	405.907	2.83722	117.175	0.81903	-816	1000	-5.7037	6.98983	46	0.98526	0.98525	0.93155	0.01143	0.0033	0.87186	0.01982	0.00572	0.33426	0.74447	1.06344	0.46286
rh_superiortemporal	13	12145.1	1650.98	12277.7	1670.47	132.615	1.086	301.336	2.46767	83.5757	0.68441	-238	933	-1.949	7.64041	91	0.98163	0.98165	1.58677	0.13855	12	11770.1	1681.05	11883.9	1702.38	113.833	0.96249	346.688	2.93133	100.08	0.8462	-323	973	-2.73104	8.22694	47	0.97849	0.9785	0.93791	0.01456	0.0042	0.88308	0.02555	0.00738	1.13742	0.27953	1.1505	0.40471
rh_supramarginal	13	11387.4	1417.03	11284.8	1525.75	-102.538	-0.90453	348.921	3.07796	96.7732	0.85367	-867	337	-7.64812	2.9728	-12	0.97166	0.97166	-1.05958	0.3102	12	10716.3	1380.47	10633.8	1509.83	-82.5833	-0.77361	345.371	3.23531	99.7	0.93395	-807	349	-7.55969	3.26931	24.5	0.97223	0.97222	0.93342	0.01662	0.0048	0.87514	0.0287	0.00829	-0.82832	0.4251	1.01028	0.49669
rh_temporalpole	13	2062.31	370.045	1967.46	403.939	-94.8461	-4.70727	235.229	11.6746	65.2408	3.23794	-684	204	-33.9474	10.1247	-29	0.80139	0.80294	-1.45379	0.17165	12	1957.67	290.033	1854.42	327.688	-103.25	-5.41699	237.818	12.4771	68.6521	3.60181	-648	209	-33.9972	10.9651	-32	0.67859	0.68343	0.84263	0.04932	0.01424	0.72805	0.07103	0.0205	-1.50396	0.16075	1.01101	0.48931
rh_transversetemporal	13	1024.46	180.818	1030.31	184.352	5.84615	0.56903	52.8754	5.1466	14.665	1.42741	-102	113	-9.92812	10.9988	20	0.96073	0.96068	0.39865	0.69716	12	953.667	165.487	952.417	159.89	-1.25	-0.13116	38.8122	4.07246	11.2041	1.17562	-92	44	-9.6533	4.6168	11	0.97386	0.97383	0.86128	0.02918	0.00842	0.75635	0.04435	0.0128	-0.11157	0.91318	1.36234	0.30792
rh_unknown	13	7189.15	1053.21	7156.54	1009.02	-32.6154	-0.45471	249.627	3.48016	69.2339	0.96522	-369	504	-5.1444	7.0265	-22	0.97244	0.97241	-0.47109	0.64603	12	3180.83	805.486	3069.42	667.13	-111.417	-3.56519	267.315	8.55375	77.1673	2.46926	-550	253	-17.5993	8.09568	-61.5	0.92898	0.92919	0.75352	0.04509	0.01302	0.60451	0.0557	0.01608	-1.44383	0.17666	1.07086	0.45138
Brain Mask Volume	13	1.5605e+06	176600	1.56045e+06	176727	-48.8462	-0.00313	565.891	0.03626	156.95	0.01006	-1411	859	-0.09042	0.05505	0	1	1	-0.31122	0.76097	12	1.58085e+06	183710	1.58073e+06	183892	-118.583	-0.0075	594.621	0.03762	171.652	0.01086	-1605	947	-0.10153	0.05991	0.5	0.99999	0.99999	0.99872	0.00245	0.00071	0.99745	0.00488	0.00141	-0.69083	0.50399	1.05077	0.46384
Brain Segmentation Volume Without Ventricles	13	1.17144e+06	150350	1.1723e+06	151653	859.615	0.07335	4123.19	0.35185	1143.57	0.09758	-6504	9549	-0.55501	0.81485	473	0.99964	0.99964	0.7517	0.46672	12	1.66438e+06	219017	1.66522e+06	221273	833.25	0.05005	5546.5	0.33316	1601.14	0.09618	-8587	13583	-0.5158	0.81589	566.5	0.9997	0.9997	0.9588	0.00933	0.00269	0.92085	0.01718	0.00496	0.52041	0.61309	1.34519	0.30841
Brain Segmentation Volume	13	1.1826e+06	155926	1.18365e+06	156777	1050.38	0.08878	4289.29	0.36254	1189.63	0.10055	-6521	9041	-0.55117	0.76416	601	0.99963	0.99963	0.88295	0.39461	12	1.68328e+06	225006	1684130	227190	853.583	0.0507	5587.82	0.33188	1613.06	0.0958	-8496	13814	-0.5046	0.82045	511.5	0.99971	0.99971	0.95901	0.00933	0.00269	0.92124	0.01718	0.00496	0.52917	0.6072	1.30274	0.32735
Intracranial Volume	13	1.44136e+06	208111	1.44144e+06	208134	78.2789	0.00543	223.23	0.01549	61.9129	0.0043	-184.625	645.5	-0.01281	0.04478	58.5	1	1	1.26434	0.23011	12	0	0	0	0	0	0	0	0	0	0	0	0	0	0	0	0	0	0	0	0	0	0	0	0	1	0	1
Determinant Talairach transform matrix	13	1.37757	0.196388	1.3775	0.196407	-6.941e-05	-0.00503865	0.00020042	0.0145495	5.559e-05	0.00403531	-0.0005059	0.00019805	-0.0367252	0.0143774	-6.616e-05	1	1	-1.24862	0.23562
Compare FS_RepeatSingle iMac v4.3.0_no_random_n30 with FS_RepeatSingle MacPro v4.3.0_no_random_nlast13 (13 vs. 12)
		Taken from aseg.stats and ?h.aparc.stats, i.e, corrected for partial volume effect																			Taken from aseg.mgz and wmparc.mgz, i.e, not corrected for partial volume effect
Struct	n	Mean1	sd1	Mean2	sd2	Mean diff	Mean diff %	sd Diff	sd Diff %	se Diff	se Diff %	min Diff	max Diff	min Diff %	max Diff %	median	ICC(1,1)	ICC(2,1)	t	p	nPairs	Mean1	sd1	Mean2	sd2	Mean diff	Mean diff %	sd Diff	sd Diff %	se Diff	se Diff %	min Diff	max Diff	min Diff %	max Diff %	median	ICC(1,1)	ICC(2,1)	SI	sd SI	se SI	OR	sd OR	se OR	t	p	F PV - noPV	pF
3rd-Ventricle	9	970.556	567.948	970.556	567.948	0	0	0	0	0	0	0	0	0	0	0	1	1	0	1	9	904.778	570.258	904.778	570.258	0	0	0	0	0	0	0	0	0	0	0	1	1	1	0	0	1	0	0	0	1	0	1
4th-Ventricle	9	1783.33	607.916	1783.33	607.916	0	0	0	0	0	0	0	0	0	0	0	1	1	0	1	9	1650.11	606.846	1650.11	606.846	0	0	0	0	0	0	0	0	0	0	0	1	1	1	0	0	1	0	0	0	1	0	1
5th-Ventricle	9	6.66667	9.43398	6.66667	9.43398	0	0	0	0	0	0	0	0	0	0	0	1	1	0	1	9	7.44444	9.1939	7.44444	9.1939	0	0	0	0	0	0	0	0	0	0	0	1	1	1	0	0	1	0	0	0	1	0	1
Brain-Stem	9	17953.2	1901.29	17953.2	1901.29	0	0	0	0	0	0	0	0	0	0	0	1	1	0	1	9	17806.8	1872.77	17806.8	1872.77	0	0	0	0	0	0	0	0	0	0	0	1	1	1	0	0	1	0	0	0	1	0	1
CC_Anterior	9	924	178.473	924	178.473	0	0	0	0	0	0	0	0	0	0	0	1	1	0	1	9	945.778	182.088	945.778	182.088	0	0	0	0	0	0	0	0	0	0	0	1	1	1	0	0	1	0	0	0	1	0	1
CC_Central	9	469.444	145.691	469.444	145.691	0	0	0	0	0	0	0	0	0	0	0	1	1	0	1	9	486.111	152.509	486.111	152.509	0	0	0	0	0	0	0	0	0	0	0	1	1	1	0	0	1	0	0	0	1	0	1
CC_Mid_Anterior	9	475.889	121.418	475.889	121.418	0	0	0	0	0	0	0	0	0	0	0	1	1	0	1	9	488.333	123.697	488.333	123.697	0	0	0	0	0	0	0	0	0	0	0	1	1	1	0	0	1	0	0	0	1	0	1
CC_Mid_Posterior	9	456.778	124.29	456.778	124.29	0	0	0	0	0	0	0	0	0	0	0	1	1	0	1	9	482.889	130.384	482.889	130.384	0	0	0	0	0	0	0	0	0	0	0	1	1	1	0	0	1	0	0	0	1	0	1
CC_Posterior	9	902.444	115.322	902.444	115.322	0	0	0	0	0	0	0	0	0	0	0	1	1	0	1	9	935.667	125.145	935.667	125.145	0	0	0	0	0	0	0	0	0	0	0	1	1	1	0	0	1	0	0	0	1	0	1
CSF	9	1085.89	262.897	1085.89	262.897	0	0	0	0	0	0	0	0	0	0	0	1	1	0	1	9	1064.56	289.624	1064.56	289.624	0	0	0	0	0	0	0	0	0	0	0	1	1	1	0	0	1	0	0	0	1	0	1
Left-Accumbens-area	9	573.667	137.796	573.667	137.796	0	0	0	0	0	0	0	0	0	0	0	1	1	0	1	9	569.111	146.316	569.111	146.316	0	0	0	0	0	0	0	0	0	0	0	1	1	1	0	0	1	0	0	0	1	0	1
Left-Amygdala	9	1750.11	263.997	1750.11	263.997	0	0	0	0	0	0	0	0	0	0	0	1	1	0	1	9	1766	264.818	1766	264.818	0	0	0	0	0	0	0	0	0	0	0	1	1	1	0	0	1	0	0	0	1	0	1
Left-Caudate	9	3829	731.334	3829	731.334	0	0	0	0	0	0	0	0	0	0	0	1	1	0	1	9	3949.67	755.517	3949.67	755.517	0	0	0	0	0	0	0	0	0	0	0	1	1	1	0	0	1	0	0	0	1	0	1
Left-Cerebellum-Cortex	9	46077.9	4435.72	46077.9	4435.72	0	0	0	0	0	0	0	0	0	0	0	1	1	0	1	9	45469.7	4405.27	45469.7	4405.27	0	0	0	0	0	0	0	0	0	0	0	1	1	1	0	0	1	0	0	0	1	0	1
Left-Cerebellum-White-Matter	9	16272.9	2605.37	16272.9	2605.37	0	0	0	0	0	0	0	0	0	0	0	1	1	0	1	9	15937.4	2588.73	15937.4	2588.73	0	0	0	0	0	0	0	0	0	0	0	1	1	1	0	0	1	0	0	0	1	0	1
Left-Cerebral-Cortex	9	252566	25448.5	252566	25448.5	0	0	0	0	0	0	0	0	0	0	0	1	1	0	1	9	253339	26341.5	253339	26341.5	0	0	0	0	0	0	0	0	0	0	0	1	1	1	0	0	1	0	0	0	1	0	1
Left-Cerebral-White-Matter	9	207345	25825.8	207345	25825.8	0	0	0	0	0	0	0	0	0	0	0	1	1	0	1	9	202373	26266.2	202373	26266.2	0	0	0	0	0	0	0	0	0	0	0	1	1	1	0	0	1	0	0	0	1	0	1
Left-Hippocampus	9	3794.56	324.172	3794.56	324.172	0	0	0	0	0	0	0	0	0	0	0	1	1	0	1	9	3931.44	341.078	3931.44	341.078	0	0	0	0	0	0	0	0	0	0	0	1	1	1	0	0	1	0	0	0	1	0	1
Left-Inf-Lat-Vent	9	448.444	339.953	448.444	339.953	0	0	0	0	0	0	0	0	0	0	0	1	1	0	1	9	456.778	380.777	456.778	380.777	0	0	0	0	0	0	0	0	0	0	0	1	1	1	0	0	1	0	0	0	1	0	1
Left-Lateral-Ventricle	9	9605.78	8564.21	9605.78	8564.21	0	0	0	0	0	0	0	0	0	0	0	1	1	0	1	9	9561.78	8700.06	9561.78	8700.06	0	0	0	0	0	0	0	0	0	0	0	1	1	1	0	0	1	0	0	0	1	0	1
Left-Pallidum	9	1601.89	442.575	1601.89	442.575	0	0	0	0	0	0	0	0	0	0	0	1	1	0	1	9	1599.78	427.477	1599.78	427.477	0	0	0	0	0	0	0	0	0	0	0	1	1	1	0	0	1	0	0	0	1	0	1
Left-Putamen	9	6134.22	685.67	6134.22	685.67	0	0	0	0	0	0	0	0	0	0	0	1	1	0	1	9	6234	708.728	6234	708.728	0	0	0	0	0	0	0	0	0	0	0	1	1	1	0	0	1	0	0	0	1	0	1
Left-Thalamus-Proper	9	6766.11	653.165	6766.11	653.165	0	0	0	0	0	0	0	0	0	0	0	1	1	0	1	9	7024.11	652.395	7024.11	652.395	0	0	0	0	0	0	0	0	0	0	0	1	1	1	0	0	1	0	0	0	1	0	1
Left-VentralDC	9	3651.89	246.478	3651.89	246.478	0	0	0	0	0	0	0	0	0	0	0	1	1	0	1	9	3706.78	251.506	3706.78	251.506	0	0	0	0	0	0	0	0	0	0	0	1	1	1	0	0	1	0	0	0	1	0	1
Left-WM-hypointensities	9	0	0	0	0	0	0	0	0	0	0	0	0	0	0	0	0	0	0	1	9	0	0	0	0	0	0	0	0	0	0	0	0	0	0	0	0	0	0	0	0	0	0	0	0	1	0	1
Left-choroid-plexus	9	1534.11	370.832	1534.11	370.832	0	0	0	0	0	0	0	0	0	0	0	1	1	0	1	9	1589.89	372.871	1589.89	372.871	0	0	0	0	0	0	0	0	0	0	0	1	1	1	0	0	1	0	0	0	1	0	1
Left-non-WM-hypointensities	9	0	0	0	0	0	0	0	0	0	0	0	0	0	0	0	0	0	0	1	9	0	0	0	0	0	0	0	0	0	0	0	0	0	0	0	0	0	0	0	0	0	0	0	0	1	0	1
Left-vessel	9	73.6667	19.8431	73.6667	19.8431	0	0	0	0	0	0	0	0	0	0	0	1	1	0	1	9	65.6667	21.2721	65.6667	21.2721	0	0	0	0	0	0	0	0	0	0	0	1	1	1	0	0	1	0	0	0	1	0	1
Optic-Chiasm	9	142.889	81.2426	142.889	81.2426	0	0	0	0	0	0	0	0	0	0	0	1	1	0	1	9	151.556	81.2636	151.556	81.2636	0	0	0	0	0	0	0	0	0	0	0	1	1	1	0	0	1	0	0	0	1	0	1
Right-Accumbens-area	9	686.889	101.014	686.889	101.014	0	0	0	0	0	0	0	0	0	0	0	1	1	0	1	9	695.667	102.487	695.667	102.487	0	0	0	0	0	0	0	0	0	0	0	1	1	1	0	0	1	0	0	0	1	0	1
Right-Amygdala	9	1847.33	308.813	1847.33	308.813	0	0	0	0	0	0	0	0	0	0	0	1	1	0	1	9	1865.22	296.171	1865.22	296.171	0	0	0	0	0	0	0	0	0	0	0	1	1	1	0	0	1	0	0	0	1	0	1
Right-Caudate	9	3917.67	732.319	3917.67	732.319	0	0	0	0	0	0	0	0	0	0	0	1	1	0	1	9	4028.67	748.642	4028.67	748.642	0	0	0	0	0	0	0	0	0	0	0	1	1	1	0	0	1	0	0	0	1	0	1
Right-Cerebellum-Cortex	9	46618.3	4466.1	46618.3	4466.1	0	0	0	0	0	0	0	0	0	0	0	1	1	0	1	9	45909	4316.45	45909	4316.45	0	0	0	0	0	0	0	0	0	0	0	1	1	1	0	0	1	0	0	0	1	0	1
Right-Cerebellum-White-Matter	9	16345.6	2535.94	16345.6	2535.94	0	0	0	0	0	0	0	0	0	0	0	1	1	0	1	9	15906.2	2570.1	15906.2	2570.1	0	0	0	0	0	0	0	0	0	0	0	1	1	1	0	0	1	0	0	0	1	0	1
Right-Cerebral-Cortex	9	253943	26690.8	253943	26690.8	0	0	0	0	0	0	0	0	0	0	0	1	1	0	1	9	254179	27352.7	254179	27352.7	0	0	0	0	0	0	0	0	0	0	0	1	1	1	0	0	1	0	0	0	1	0	1
Right-Cerebral-White-Matter	9	209563	25834.9	209563	25834.9	0	0	0	0	0	0	0	0	0	0	0	1	1	0	1	9	205222	26003.7	205222	26003.7	0	0	0	0	0	0	0	0	0	0	0	1	1	1	0	0	1	0	0	0	1	0	1
Right-Hippocampus	9	4039.89	413.411	4039.89	413.411	0	0	0	0	0	0	0	0	0	0	0	1	1	0	1	9	4182.44	411.106	4182.44	411.106	0	0	0	0	0	0	0	0	0	0	0	1	1	1	0	0	1	0	0	0	1	0	1
Right-Inf-Lat-Vent	9	320.778	165.259	320.778	165.259	0	0	0	0	0	0	0	0	0	0	0	1	1	0	1	9	323.556	180.82	323.556	180.82	0	0	0	0	0	0	0	0	0	0	0	1	1	1	0	0	1	0	0	0	1	0	1
Right-Lateral-Ventricle	9	6393.56	3747.22	6393.56	3747.22	0	0	0	0	0	0	0	0	0	0	0	1	1	0	1	9	6320.33	3831.35	6320.33	3831.35	0	0	0	0	0	0	0	0	0	0	0	1	1	1	0	0	1	0	0	0	1	0	1
Right-Pallidum	9	1445.56	334.171	1445.56	334.171	0	0	0	0	0	0	0	0	0	0	0	1	1	0	1	9	1450.78	319.237	1450.78	319.237	0	0	0	0	0	0	0	0	0	0	0	1	1	1	0	0	1	0	0	0	1	0	1
Right-Putamen	9	5804.56	614.951	5804.56	614.951	0	0	0	0	0	0	0	0	0	0	0	1	1	0	1	9	5900.89	652.807	5900.89	652.807	0	0	0	0	0	0	0	0	0	0	0	1	1	1	0	0	1	0	0	0	1	0	1
Right-Thalamus-Proper	9	6909.11	705.686	6909.11	705.686	0	0	0	0	0	0	0	0	0	0	0	1	1	0	1	9	7185	708.168	7185	708.168	0	0	0	0	0	0	0	0	0	0	0	1	1	1	0	0	1	0	0	0	1	0	1
Right-VentralDC	9	3640.44	324.029	3640.44	324.029	0	0	0	0	0	0	0	0	0	0	0	1	1	0	1	9	3727.11	329.039	3727.11	329.039	0	0	0	0	0	0	0	0	0	0	0	1	1	1	0	0	1	0	0	0	1	0	1
Right-WM-hypointensities	9	0	0	0	0	0	0	0	0	0	0	0	0	0	0	0	0	0	0	1	9	0	0	0	0	0	0	0	0	0	0	0	0	0	0	0	0	0	0	0	0	0	0	0	0	1	0	1
Right-choroid-plexus	9	1719.33	398.034	1719.33	398.034	0	0	0	0	0	0	0	0	0	0	0	1	1	0	1	9	1743.44	402.868	1743.44	402.868	0	0	0	0	0	0	0	0	0	0	0	1	1	1	0	0	1	0	0	0	1	0	1
Right-non-WM-hypointensities	9	0	0	0	0	0	0	0	0	0	0	0	0	0	0	0	0	0	0	1	9	0	0	0	0	0	0	0	0	0	0	0	0	0	0	0	0	0	0	0	0	0	0	0	0	1	0	1
Right-vessel	9	59.3333	35.6896	59.3333	35.6896	0	0	0	0	0	0	0	0	0	0	0	1	1	0	1	9	46.2222	26.4895	46.2222	26.4895	0	0	0	0	0	0	0	0	0	0	0	1	1	1	0	0	1	0	0	0	1	0	1
WM-hypointensities	9	1392.44	670.831	1392.44	670.831	0	0	0	0	0	0	0	0	0	0	0	1	1	0	1	9	1391.11	675.811	1391.11	675.811	0	0	0	0	0	0	0	0	0	0	0	1	1	1	0	0	1	0	0	0	1	0	1
non-WM-hypointensities	9	11.5556	6.72888	11.5556	6.72888	0	0	0	0	0	0	0	0	0	0	0	1	1	0	1	9	13.7778	8.08977	13.7778	8.08977	0	0	0	0	0	0	0	0	0	0	0	1	1	1	0	0	1	0	0	0	1	0	1
lh_bankssts	9	2530.11	512.911	2530.11	512.911	0	0	0	0	0	0	0	0	0	0	0	1	1	0	1	9	2417.89	484.559	2417.89	484.559	0	0	0	0	0	0	0	0	0	0	0	1	1	1	0	0	1	0	0	0	1	0	1
lh_caudalanteriorcingulate	9	2086	427.685	2086	427.685	0	0	0	0	0	0	0	0	0	0	0	1	1	0	1	9	1939.78	420.95	1939.78	420.95	0	0	0	0	0	0	0	0	0	0	0	1	1	1	0	0	1	0	0	0	1	0	1
lh_caudalmiddlefrontal	9	7227.56	769.884	7227.56	769.884	0	0	0	0	0	0	0	0	0	0	0	1	1	0	1	9	6914.11	731.636	6914.11	731.636	0	0	0	0	0	0	0	0	0	0	0	1	1	1	0	0	1	0	0	0	1	0	1
lh_cuneus	9	3110.78	403.62	3110.78	403.62	0	0	0	0	0	0	0	0	0	0	0	1	1	0	1	9	2862.56	370.996	2862.56	370.996	0	0	0	0	0	0	0	0	0	0	0	1	1	1	0	0	1	0	0	0	1	0	1
lh_entorhinal	9	2134.33	432.746	2134.33	432.746	0	0	0	0	0	0	0	0	0	0	0	1	1	0	1	9	1924	388.669	1924	388.669	0	0	0	0	0	0	0	0	0	0	0	1	1	1	0	0	1	0	0	0	1	0	1
lh_frontalpole	9	639.556	94.153	639.556	94.153	0	0	0	0	0	0	0	0	0	0	0	1	1	0	1	9	639.667	95.4398	639.667	95.4398	0	0	0	0	0	0	0	0	0	0	0	1	1	1	0	0	1	0	0	0	1	0	1
lh_fusiform	9	9084.78	1422.55	9084.78	1422.55	0	0	0	0	0	0	0	0	0	0	0	1	1	0	1	9	8498.33	1380.78	8498.33	1380.78	0	0	0	0	0	0	0	0	0	0	0	1	1	1	0	0	1	0	0	0	1	0	1
lh_inferiorparietal	9	12523.4	2620.58	12523.4	2620.58	0	0	0	0	0	0	0	0	0	0	0	1	1	0	1	9	11571.2	2393.69	11571.2	2393.69	0	0	0	0	0	0	0	0	0	0	0	1	1	1	0	0	1	0	0	0	1	0	1
lh_inferiortemporal	9	9470.89	829.635	9470.89	829.635	0	0	0	0	0	0	0	0	0	0	0	1	1	0	1	9	9010.44	827.025	9010.44	827.025	0	0	0	0	0	0	0	0	0	0	0	1	1	1	0	0	1	0	0	0	1	0	1
lh_insula	9	6289.33	686.815	6289.33	686.815	0	0	0	0	0	0	0	0	0	0	0	1	1	0	1	9	6081.78	730.817	6081.78	730.817	0	0	0	0	0	0	0	0	0	0	0	1	1	1	0	0	1	0	0	0	1	0	1
lh_isthmuscingulate	9	2511.11	435.565	2511.11	435.565	0	0	0	0	0	0	0	0	0	0	0	1	1	0	1	9	2277.78	401.431	2277.78	401.431	0	0	0	0	0	0	0	0	0	0	0	1	1	1	0	0	1	0	0	0	1	0	1
lh_lateraloccipital	9	12473.7	2203.23	12473.7	2203.23	0	0	0	0	0	0	0	0	0	0	0	1	1	0	1	9	11523.7	2047.33	11523.7	2047.33	0	0	0	0	0	0	0	0	0	0	0	1	1	1	0	0	1	0	0	0	1	0	1
lh_lateralorbitofrontal	9	8054.89	921.865	8054.89	921.865	0	0	0	0	0	0	0	0	0	0	0	1	1	0	1	9	7786.78	896.234	7786.78	896.234	0	0	0	0	0	0	0	0	0	0	0	1	1	1	0	0	1	0	0	0	1	0	1
lh_lingual	9	6813.56	1162.52	6813.56	1162.52	0	0	0	0	0	0	0	0	0	0	0	1	1	0	1	9	6228.89	1137.17	6228.89	1137.17	0	0	0	0	0	0	0	0	0	0	0	1	1	1	0	0	1	0	0	0	1	0	1
lh_medialorbitofrontal	9	4469.22	733.061	4469.22	733.061	0	0	0	0	0	0	0	0	0	0	0	1	1	0	1	9	4228.22	698.987	4228.22	698.987	0	0	0	0	0	0	0	0	0	0	0	1	1	1	0	0	1	0	0	0	1	0	1
lh_middletemporal	9	10408.4	1590.7	10408.4	1590.7	0	0	0	0	0	0	0	0	0	0	0	1	1	0	1	9	10026.4	1497.29	10026.4	1497.29	0	0	0	0	0	0	0	0	0	0	0	1	1	1	0	0	1	0	0	0	1	0	1
lh_paracentral	9	3859.67	620.764	3859.67	620.764	0	0	0	0	0	0	0	0	0	0	0	1	1	0	1	9	3718.44	602.943	3718.44	602.943	0	0	0	0	0	0	0	0	0	0	0	1	1	1	0	0	1	0	0	0	1	0	1
lh_parahippocampal	9	2579.56	350.537	2579.56	350.537	0	0	0	0	0	0	0	0	0	0	0	1	1	0	1	9	2394.11	324.372	2394.11	324.372	0	0	0	0	0	0	0	0	0	0	0	1	1	1	0	0	1	0	0	0	1	0	1
lh_parsopercularis	9	5116.89	411.611	5116.89	411.611	0	0	0	0	0	0	0	0	0	0	0	1	1	0	1	9	4927.33	412.234	4927.33	412.234	0	0	0	0	0	0	0	0	0	0	0	1	1	1	0	0	1	0	0	0	1	0	1
lh_parsorbitalis	9	2220.22	424.905	2220.22	424.905	0	0	0	0	0	0	0	0	0	0	0	1	1	0	1	9	2162.11	412.956	2162.11	412.956	0	0	0	0	0	0	0	0	0	0	0	1	1	1	0	0	1	0	0	0	1	0	1
lh_parstriangularis	9	3809.56	728.897	3809.56	728.897	0	0	0	0	0	0	0	0	0	0	0	1	1	0	1	9	3681.22	727.484	3681.22	727.484	0	0	0	0	0	0	0	0	0	0	0	1	1	1	0	0	1	0	0	0	1	0	1
lh_pericalcarine	9	2172.11	390.459	2172.11	390.459	0	0	0	0	0	0	0	0	0	0	0	1	1	0	1	9	2003.11	348.253	2003.11	348.253	0	0	0	0	0	0	0	0	0	0	0	1	1	1	0	0	1	0	0	0	1	0	1
lh_postcentral	9	11249.7	1114.69	11249.7	1114.69	0	0	0	0	0	0	0	0	0	0	0	1	1	0	1	9	10664.2	1078.16	10664.2	1078.16	0	0	0	0	0	0	0	0	0	0	0	1	1	1	0	0	1	0	0	0	1	0	1
lh_posteriorcingulate	9	3869	648.041	3869	648.041	0	0	0	0	0	0	0	0	0	0	0	1	1	0	1	9	3538.67	614.309	3538.67	614.309	0	0	0	0	0	0	0	0	0	0	0	1	1	1	0	0	1	0	0	0	1	0	1
lh_precentral	9	14232.7	1312.59	14232.7	1312.59	0	0	0	0	0	0	0	0	0	0	0	1	1	0	1	9	13799	1251.25	13799	1251.25	0	0	0	0	0	0	0	0	0	0	0	1	1	1	0	0	1	0	0	0	1	0	1
lh_precuneus	9	10933.4	1252.7	10933.4	1252.7	0	0	0	0	0	0	0	0	0	0	0	1	1	0	1	9	10302.3	1199.08	10302.3	1199.08	0	0	0	0	0	0	0	0	0	0	0	1	1	1	0	0	1	0	0	0	1	0	1
lh_rostralanteriorcingulate	9	2380.67	460.546	2380.67	460.546	0	0	0	0	0	0	0	0	0	0	0	1	1	0	1	9	2218.89	444.377	2218.89	444.377	0	0	0	0	0	0	0	0	0	0	0	1	1	1	0	0	1	0	0	0	1	0	1
lh_rostralmiddlefrontal	9	15377.6	2748.82	15377.6	2748.82	0	0	0	0	0	0	0	0	0	0	0	1	1	0	1	9	14973.9	2682.51	14973.9	2682.51	0	0	0	0	0	0	0	0	0	0	0	1	1	1	0	0	1	0	0	0	1	0	1
lh_superiorfrontal	9	23745.1	2407.95	23745.1	2407.95	0	0	0	0	0	0	0	0	0	0	0	1	1	0	1	9	22962	2315.77	22962	2315.77	0	0	0	0	0	0	0	0	0	0	0	1	1	1	0	0	1	0	0	0	1	0	1
lh_superiorparietal	9	15050.8	1546.75	15050.8	1546.75	0	0	0	0	0	0	0	0	0	0	0	1	1	0	1	9	13841.2	1361.85	13841.2	1361.85	0	0	0	0	0	0	0	0	0	0	0	1	1	1	0	0	1	0	0	0	1	0	1
lh_superiortemporal	9	12076.8	1291.66	12076.8	1291.66	0	0	0	0	0	0	0	0	0	0	0	1	1	0	1	9	11727.3	1270.02	11727.3	1270.02	0	0	0	0	0	0	0	0	0	0	0	1	1	1	0	0	1	0	0	0	1	0	1
lh_supramarginal	9	11461.6	1749.75	11461.6	1749.75	0	0	0	0	0	0	0	0	0	0	0	1	1	0	1	9	10873.8	1609.24	10873.8	1609.24	0	0	0	0	0	0	0	0	0	0	0	1	1	1	0	0	1	0	0	0	1	0	1
lh_temporalpole	9	1973.22	273.401	1973.22	273.401	0	0	0	0	0	0	0	0	0	0	0	1	1	0	1	9	1937.11	257.864	1937.11	257.864	0	0	0	0	0	0	0	0	0	0	0	1	1	1	0	0	1	0	0	0	1	0	1
lh_transversetemporal	9	1272.67	318.797	1272.67	318.797	0	0	0	0	0	0	0	0	0	0	0	1	1	0	1	9	1203.89	296.445	1203.89	296.445	0	0	0	0	0	0	0	0	0	0	0	1	1	1	0	0	1	0	0	0	1	0	1
lh_unknown	9	6805.78	1050.82	6805.78	1050.82	0	0	0	0	0	0	0	0	0	0	0	1	1	0	1	9	3159.89	817.213	3159.89	817.213	0	0	0	0	0	0	0	0	0	0	0	1	1	1	0	0	1	0	0	0	1	0	1
rh_bankssts	9	2618.33	275.875	2618.33	275.875	0	0	0	0	0	0	0	0	0	0	0	1	1	0	1	9	2493.22	253.143	2493.22	253.143	0	0	0	0	0	0	0	0	0	0	0	1	1	1	0	0	1	0	0	0	1	0	1
rh_caudalanteriorcingulate	9	2168.89	542.084	2168.89	542.084	0	0	0	0	0	0	0	0	0	0	0	1	1	0	1	9	2034.44	539.96	2034.44	539.96	0	0	0	0	0	0	0	0	0	0	0	1	1	1	0	0	1	0	0	0	1	0	1
rh_caudalmiddlefrontal	9	6586	959.874	6586	959.874	0	0	0	0	0	0	0	0	0	0	0	1	1	0	1	9	6249.78	928.303	6249.78	928.303	0	0	0	0	0	0	0	0	0	0	0	1	1	1	0	0	1	0	0	0	1	0	1
rh_cuneus	9	3021.33	347.957	3021.33	347.957	0	0	0	0	0	0	0	0	0	0	0	1	1	0	1	9	2813.89	300.309	2813.89	300.309	0	0	0	0	0	0	0	0	0	0	0	1	1	1	0	0	1	0	0	0	1	0	1
rh_entorhinal	9	1869.33	301.637	1869.33	301.637	0	0	0	0	0	0	0	0	0	0	0	1	1	0	1	9	1713.11	339.055	1713.11	339.055	0	0	0	0	0	0	0	0	0	0	0	1	1	1	0	0	1	0	0	0	1	0	1
rh_frontalpole	9	868.222	186.784	868.222	186.784	0	0	0	0	0	0	0	0	0	0	0	1	1	0	1	9	864.778	185.705	864.778	185.705	0	0	0	0	0	0	0	0	0	0	0	1	1	1	0	0	1	0	0	0	1	0	1
rh_fusiform	9	9339.11	1530.85	9339.11	1530.85	0	0	0	0	0	0	0	0	0	0	0	1	1	0	1	9	8753.78	1457	8753.78	1457	0	0	0	0	0	0	0	0	0	0	0	1	1	1	0	0	1	0	0	0	1	0	1
rh_inferiorparietal	9	15110.8	1883.8	15110.8	1883.8	0	0	0	0	0	0	0	0	0	0	0	1	1	0	1	9	13968	1710.04	13968	1710.04	0	0	0	0	0	0	0	0	0	0	0	1	1	1	0	0	1	0	0	0	1	0	1
rh_inferiortemporal	9	9405.22	1990.2	9405.22	1990.2	0	0	0	0	0	0	0	0	0	0	0	1	1	0	1	9	9020.11	1921.02	9020.11	1921.02	0	0	0	0	0	0	0	0	0	0	0	1	1	1	0	0	1	0	0	0	1	0	1
rh_insula	9	6126.11	659.995	6126.11	659.995	0	0	0	0	0	0	0	0	0	0	0	1	1	0	1	9	5881.44	687.195	5881.44	687.195	0	0	0	0	0	0	0	0	0	0	0	1	1	1	0	0	1	0	0	0	1	0	1
rh_isthmuscingulate	9	2481.33	523.697	2481.33	523.697	0	0	0	0	0	0	0	0	0	0	0	1	1	0	1	9	2258.89	498.06	2258.89	498.06	0	0	0	0	0	0	0	0	0	0	0	1	1	1	0	0	1	0	0	0	1	0	1
rh_lateraloccipital	9	11614.6	2680.14	11614.6	2680.14	0	0	0	0	0	0	0	0	0	0	0	1	1	0	1	9	10675.9	2414.81	10675.9	2414.81	0	0	0	0	0	0	0	0	0	0	0	1	1	1	0	0	1	0	0	0	1	0	1
rh_lateralorbitofrontal	9	7700.89	922.568	7700.89	922.568	0	0	0	0	0	0	0	0	0	0	0	1	1	0	1	9	7442.78	875.104	7442.78	875.104	0	0	0	0	0	0	0	0	0	0	0	1	1	1	0	0	1	0	0	0	1	0	1
rh_lingual	9	6617.89	845.37	6617.89	845.37	0	0	0	0	0	0	0	0	0	0	0	1	1	0	1	9	6150.22	826.011	6150.22	826.011	0	0	0	0	0	0	0	0	0	0	0	1	1	1	0	0	1	0	0	0	1	0	1
rh_medialorbitofrontal	9	4742.44	940.932	4742.44	940.932	0	0	0	0	0	0	0	0	0	0	0	1	1	0	1	9	4558.22	909.146	4558.22	909.146	0	0	0	0	0	0	0	0	0	0	0	1	1	1	0	0	1	0	0	0	1	0	1
rh_middletemporal	9	11269.8	1363.58	11269.8	1363.58	0	0	0	0	0	0	0	0	0	0	0	1	1	0	1	9	10708	1354.54	10708	1354.54	0	0	0	0	0	0	0	0	0	0	0	1	1	1	0	0	1	0	0	0	1	0	1
rh_paracentral	9	4537.44	638.031	4537.44	638.031	0	0	0	0	0	0	0	0	0	0	0	1	1	0	1	9	4403.78	604.136	4403.78	604.136	0	0	0	0	0	0	0	0	0	0	0	1	1	1	0	0	1	0	0	0	1	0	1
rh_parahippocampal	9	2293.22	329.313	2293.22	329.313	0	0	0	0	0	0	0	0	0	0	0	1	1	0	1	9	2173.56	321.867	2173.56	321.867	0	0	0	0	0	0	0	0	0	0	0	1	1	1	0	0	1	0	0	0	1	0	1
rh_parsopercularis	9	4400	1080.18	4400	1080.18	0	0	0	0	0	0	0	0	0	0	0	1	1	0	1	9	4215.11	1035.15	4215.11	1035.15	0	0	0	0	0	0	0	0	0	0	0	1	1	1	0	0	1	0	0	0	1	0	1
rh_parsorbitalis	9	2769.33	412.132	2769.33	412.132	0	0	0	0	0	0	0	0	0	0	0	1	1	0	1	9	2681.44	392.741	2681.44	392.741	0	0	0	0	0	0	0	0	0	0	0	1	1	1	0	0	1	0	0	0	1	0	1
rh_parstriangularis	9	4191.56	749.146	4191.56	749.146	0	0	0	0	0	0	0	0	0	0	0	1	1	0	1	9	4005.33	714.142	4005.33	714.142	0	0	0	0	0	0	0	0	0	0	0	1	1	1	0	0	1	0	0	0	1	0	1
rh_pericalcarine	9	2772.11	603.487	2772.11	603.487	0	0	0	0	0	0	0	0	0	0	0	1	1	0	1	9	2558.89	535.911	2558.89	535.911	0	0	0	0	0	0	0	0	0	0	0	1	1	1	0	0	1	0	0	0	1	0	1
rh_postcentral	9	10211.7	1136.14	10211.7	1136.14	0	0	0	0	0	0	0	0	0	0	0	1	1	0	1	9	9644.44	1087.35	9644.44	1087.35	0	0	0	0	0	0	0	0	0	0	0	1	1	1	0	0	1	0	0	0	1	0	1
rh_posteriorcingulate	9	3562.67	638.266	3562.67	638.266	0	0	0	0	0	0	0	0	0	0	0	1	1	0	1	9	3271.44	614.864	3271.44	614.864	0	0	0	0	0	0	0	0	0	0	0	1	1	1	0	0	1	0	0	0	1	0	1
rh_precentral	9	13803.1	1804.91	13803.1	1804.91	0	0	0	0	0	0	0	0	0	0	0	1	1	0	1	9	13342.7	1753.69	13342.7	1753.69	0	0	0	0	0	0	0	0	0	0	0	1	1	1	0	0	1	0	0	0	1	0	1
rh_precuneus	9	10972.9	1877.73	10972.9	1877.73	0	0	0	0	0	0	0	0	0	0	0	1	1	0	1	9	10381.3	1758.99	10381.3	1758.99	0	0	0	0	0	0	0	0	0	0	0	1	1	1	0	0	1	0	0	0	1	0	1
rh_rostralanteriorcingulate	9	1785.33	375.668	1785.33	375.668	0	0	0	0	0	0	0	0	0	0	0	1	1	0	1	9	1670.89	385.111	1670.89	385.111	0	0	0	0	0	0	0	0	0	0	0	1	1	1	0	0	1	0	0	0	1	0	1
rh_rostralmiddlefrontal	9	16519.9	3288.29	16519.9	3288.29	0	0	0	0	0	0	0	0	0	0	0	1	1	0	1	9	15942.9	3155.35	15942.9	3155.35	0	0	0	0	0	0	0	0	0	0	0	1	1	1	0	0	1	0	0	0	1	0	1
rh_superiorfrontal	9	23455.3	2925.65	23455.3	2925.65	0	0	0	0	0	0	0	0	0	0	0	1	1	0	1	9	22795.8	2856.32	22795.8	2856.32	0	0	0	0	0	0	0	0	0	0	0	1	1	1	0	0	1	0	0	0	1	0	1
rh_superiorparietal	9	14772	1989.96	14772	1989.96	0	0	0	0	0	0	0	0	0	0	0	1	1	0	1	9	13570	1779.02	13570	1779.02	0	0	0	0	0	0	0	0	0	0	0	1	1	1	0	0	1	0	0	0	1	0	1
rh_superiortemporal	9	11705	1087.64	11705	1087.64	0	0	0	0	0	0	0	0	0	0	0	1	1	0	1	9	11367.4	1083.17	11367.4	1083.17	0	0	0	0	0	0	0	0	0	0	0	1	1	1	0	0	1	0	0	0	1	0	1
rh_supramarginal	9	11290.8	1476.89	11290.8	1476.89	0	0	0	0	0	0	0	0	0	0	0	1	1	0	1	9	10673.6	1384.32	10673.6	1384.32	0	0	0	0	0	0	0	0	0	0	0	1	1	1	0	0	1	0	0	0	1	0	1
rh_temporalpole	9	2041.44	364.179	2041.44	364.179	0	0	0	0	0	0	0	0	0	0	0	1	1	0	1	9	2009.78	364.12	2009.78	364.12	0	0	0	0	0	0	0	0	0	0	0	1	1	1	0	0	1	0	0	0	1	0	1
rh_transversetemporal	9	972.889	161.087	972.889	161.087	0	0	0	0	0	0	0	0	0	0	0	1	1	0	1	9	924.889	150.476	924.889	150.476	0	0	0	0	0	0	0	0	0	0	0	1	1	1	0	0	1	0	0	0	1	0	1
rh_unknown	9	6947.33	793.162	6947.33	793.162	0	0	0	0	0	0	0	0	0	0	0	1	1	0	1	9	2912.11	563.126	2912.11	563.126	0	0	0	0	0	0	0	0	0	0	0	1	1	1	0	0	1	0	0	0	1	0	1
Brain Mask Volume	9	1.51571e+06	154553	1.51571e+06	154553	0	0	0	0	0	0	0	0	0	0	0	1	1	0	1	9	1.53237e+06	153630	1.53237e+06	153630	0	0	0	0	0	0	0	0	0	0	0	1	1	1	0	0	1	0	0	0	1	0	1
Brain Segmentation Volume Without Ventricles	9	1.12801e+06	107463	1.12801e+06	107463	0	0	0	0	0	0	0	0	0	0	0	1	1	0	1	9	1.5923e+06	149308	1.5923e+06	149308	0	0	0	0	0	0	0	0	0	0	0	1	1	1	0	0	1	0	0	0	1	0	1
Brain Segmentation Volume	9	1.13925e+06	114571	1.13925e+06	114571	0	0	0	0	0	0	0	0	0	0	0	1	1	0	1	9	1.61074e+06	155787	1.61074e+06	155787	0	0	0	0	0	0	0	0	0	0	0	1	1	1	0	0	1	0	0	0	1	0	1
Intracranial Volume	9	1.40863e+06	172650	1.40863e+06	172650	0	0	0	0	0	0	0	0	0	0	0	1	1	0	1	9	0	0	0	0	0	0	0	0	0	0	0	0	0	0	0	0	0	0	0	0	0	0	0	0	1	0	1
Determinant Talairach transform matrix	9	1.40196	0.175171	1.40196	0.175171	0	0	0	0	0	0	0	0	0	0	0	1	1	0	1

## Sheet: Legend
Table S1. Detailed results for the voxel volume measurements
This EXCEL file consists of four sheets and each sheet contains three blocks.
- Sheet 1 is named “HP vs. Mac” and refers to the comparison between the HP and Macintosh workstations for the Freesurfer versions v4.3.1, v4.5.0, and v5.0.0.
- Sheet 2 is named “Between-version Mac” and shows the results for the comparisons v4.3.1 vs. v4.5.0, v4.3.1 vs. v5.0.0, and v4.5.0 vs. v5.0.0 for the Macintosch (OSX 10.5.8)
- Sheet 3 is named “Between-version HP” and shows the results for the comparisons v4.3.1 vs. v4.5.0, v4.3.1 vs. v5.0.0, and v4.5.0 vs. v5.0.0 for the HP (CentOS 5.3)
- Sheet 4 is named “OSX10.6 vs. OSX10.5” and refers to the comparison between the Mac OSX 10.6.4/5 and OSX 10.5.8 for the Freesurfer versions v4.3.1, v4.5.0, and v5.0.0.
For all comparisons N = 30 pairs were considered.
The columns contain the following statistics as shown in the header row of each block:
- Mean1 and Mean2 are the mean values for measurements 1 and 2, respectively (e.g., for sheet 1, measurement 1 refers to HP and measurement 2 refers to Mac).
- sd1 and sd2 are the corresponding standard deviations.
- Mean diff is the mean value of the differences between the measurements.
- Mean diff % is the percentage mean value of the differences between the measurements taken relative to the mean value of the two measurements.
- sd Diff is the standard deviation of the differences between the measurements.
- sd Diff % is percentage standard deviation of the differences between the measurements taken relative to the mean value of the two measurements.
- se Diff is the standard error of the differences between the measurements.
- se Diff % is percentage standard error of the differences between the measurements taken relative to the mean value of the two measurements.
- min Diff is the minimum of the differences between the measurements.
- min Diff % is the percentage minimum of the differences between the measurements taken relative to the mean value of the two measurements.
- max Diff is the maximum of the differences between the measurements.
- max Diff % is the percentage maximum of the differences between the measurements taken relative to the mean value of the two measurements.
- median is the median value of the differences between the measurements.
- then follow 10 columns referring to the absolute differences AbsDiff.
- ICC is the intra-class correlation coefficient (one-way random effects model, Shrout and Fleiss, 1979)
- SI is the mean value of similarity indexes (also known as Dice coefficent) of the two measurements.
- sd SI is the standard deviation of the similarity indexes of the two measurements.
- se SI is the standard error of the similarity indexes of the two measurements.
- OR is the mean value of the overlap ratios (also known as Jaccard coefficent) of the two measurements.
- sd OR is the standard deviation of the overlap ratios of the two measurements.
- se OR is the standard error of the overlap ratios of the two measurements.
- p is the p-value derived from the Student t test.
- -log10(p) is the negative value of the 10-based logarithm of the p-value.

## Sheet: HP vs Mac
v4.3.1
Struct	Mean1	sd1	Mean2	sd2	Mean diff	Mean diff %	sd Diff	sd Diff %	se Diff	se Diff %	min Diff	max Diff	min Diff %	max Diff %	median	Mean AbsDiff	Mean AbsDiff %	sd AbsDiff	sd AbsDiff %	se AbsDiff	se AbsDiff %	min AbsDiff	max AbsDiff	min AbsDiff %	max AbsDiff %	ICC	SI	sd SI	se SI	OR	sd OR	se OR	p	-log10(p)
3rd-Ventricle	981.357	462.572	964.321	460.768	-17.0357	-1.75113	40.1253	4.12455	7.58296	0.77947	-165	41	-16.9607	4.21447	-7.5	25.5357	2.62486	35.1394	3.61204	6.64072	0.68261	1	165	0.10279	16.9607	0.99568	0.96456	0.02365	0.00447	0.93154	0.04321	0.00817	0.03305	1.48087
4th-Ventricle	1825.21	784.968	1813	749.247	-12.2143	-0.67144	64.527	3.54718	12.1944	0.67035	-215	98	-11.819	5.38726	-2.5	43.2143	2.37558	48.8037	2.68284	9.22304	0.50701	1	215	0.05497	11.819	0.99646	0.96089	0.02119	0.004	0.92473	0.03912	0.00739	0.32542	0.48756
5th-Ventricle	7.78571	8.84164	6.82143	8.64979	-0.96429	-13.2029	3.58476	49.0823	0.67746	9.27569	-10	6	-136.919	82.1516	0	2.60714	35.6968	2.60113	35.6145	0.49157	6.7305	0	10	0	136.919	0.91306	0.75795	0.35751	0.06756	0.61024	0.31787	0.06007	0.16608	0.77969
Brain-Stem	18077.1	2302.66	18071.1	2284.43	-5.92857	-0.0328	178.643	0.98839	33.7604	0.18679	-694	239	-3.83975	1.32233	-8	116.571	0.64496	133.633	0.73936	25.2542	0.13973	6	694	0.0332	3.83975	0.99707	0.97796	0.01115	0.00211	0.95687	0.02126	0.00402	0.86191	0.06454
CC_Anterior	955.071	158.267	953.643	156.436	-1.42857	-0.14969	17.8521	1.87059	3.37373	0.35351	-42	52	-4.40087	5.44869	-4	12.5714	1.31727	12.5268	1.31259	2.36734	0.24806	1	52	0.10478	5.44869	0.99375	0.96718	0.05064	0.00957	0.93645	0.08501	0.01606	0.67533	0.17048
CC_Central	480.143	118.074	484.429	125.391	4.28571	0.88863	32.4127	6.72064	6.12542	1.27008	-42	159	-8.70853	32.968	0	11.2857	2.34005	30.6194	6.3488	5.78651	1.19981	0	159	0	32.968	0.96522	0.96445	0.05913	0.01117	0.93135	0.10101	0.01909	0.49012	0.30969
CC_Mid_Anterior	509.75	132.506	511.429	134.785	1.67857	0.32875	9.51433	1.8634	1.79804	0.35215	-10	37	-1.95852	7.24653	-0.5	5.82143	1.14014	7.63546	1.49542	1.44297	0.28261	0	37	0	7.24653	0.99748	0.9603	0.05514	0.01042	0.92364	0.09517	0.01799	0.35881	0.44514
CC_Mid_Posterior	464.893	101.321	468.5	106.443	3.60714	0.77291	15.7512	3.37503	2.97669	0.63782	-25	64	-5.3568	13.7134	0	8.32143	1.78305	13.7761	2.95184	2.60344	0.55785	0	64	0	13.7134	0.98832	0.96836	0.05413	0.01023	0.93865	0.09107	0.01721	0.23609	0.62692
CC_Posterior	915.679	159.725	911.893	161.668	-3.78571	-0.41429	21.7534	2.38058	4.11101	0.44989	-98	46	-10.7246	5.034	-1	10.0714	1.10217	19.5674	2.14136	3.69789	0.40468	0	98	0	10.7246	0.99089	0.97049	0.06878	0.013	0.94267	0.10671	0.02017	0.36527	0.43738
CSF	1208	283.351	1213	292.969	5	0.41305	50.6389	4.1833	9.56985	0.79057	-63	177	-5.20446	14.6221	-2.5	30	2.47831	40.7049	3.36265	7.6925	0.63548	0	177	0	14.6221	0.98496	0.94633	0.02849	0.00538	0.89813	0.05104	0.00965	0.6056	0.21781
Left-Accumbens-area	576	117.143	589.607	126.368	13.6071	2.33477	39.5992	6.79461	7.48355	1.28406	-116	91	-19.9038	15.6142	16.5	31.1071	5.3375	27.5067	4.71972	5.19827	0.89194	0	116	0	19.9038	0.94296	0.90934	0.04975	0.0094	0.83375	0.08139	0.01538	0.08013	1.09618
Left-Amygdala	1766.36	331.697	1754.43	362.112	-11.9286	-0.67761	84.9051	4.82308	16.0456	0.91148	-259	182	-14.7126	10.3386	-13.5	60.9286	3.46108	59.2171	3.36386	11.191	0.63571	1	259	0.05681	14.7126	0.97058	0.92993	0.03947	0.00746	0.86903	0.06601	0.01247	0.46365	0.33381
Left-Caudate	4001.39	562.301	4048.64	581.785	47.25	1.17391	135.531	3.36723	25.6131	0.63635	-66	672	-1.63974	16.6956	16	65.3929	1.62466	127.473	3.16702	24.0902	0.59851	0	672	0	16.6956	0.96957	0.96764	0.02042	0.00386	0.93732	0.03703	0.007	0.07607	1.11879
Left-Cerebellum-Cortex	47629.3	6717.69	47542.5	6674.13	-86.8214	-0.18245	522.621	1.09827	98.7661	0.20755	-1367	1179	-2.8727	2.47763	-3	367.893	0.77311	374.956	0.78796	70.86	0.14891	16	1367	0.03362	2.8727	0.99698	0.9604	0.02024	0.00383	0.92382	0.03736	0.00706	0.38712	0.41215
Left-Cerebellum-White-Matter	16216.7	2392.44	16135.2	2610.56	-81.4643	-0.50361	770.22	4.76152	145.558	0.89984	-1923	2763	-11.888	17.0809	-26	429.679	2.65628	639.265	3.95195	120.81	0.74685	3	2763	0.01855	17.0809	0.95382	0.9637	0.0235	0.00444	0.92994	0.0427	0.00807	0.58032	0.23633
Left-Cerebral-Cortex	261528	33948.7	262455	35103.5	926.786	0.35375	5845.73	2.23126	1104.74	0.42167	-7870	27366	-3.00391	10.4454	77.5	2475.86	0.94501	5357.84	2.04504	1012.54	0.38648	22	27366	0.0084	10.4454	0.98582	0.96794	0.02418	0.00457	0.93787	0.04351	0.00822	0.40888	0.3884
Left-Cerebral-White-Matter	207622	30618.2	207251	31594	-370.714	-0.17871	2968.92	1.43124	561.073	0.27048	-7678	9746	-3.70138	4.69831	-64	1677.14	0.80851	2457.64	1.18477	464.451	0.2239	14	9746	0.00675	4.69831	0.99554	0.98283	0.01403	0.00265	0.96625	0.0265	0.00501	0.51439	0.28871
Left-Hippocampus	4092.46	535.774	4092.5	518.533	0.03571	0.00087	103.596	2.53136	19.5777	0.47838	-228	201	-5.57119	4.91144	-11	79.1786	1.93473	65.043	1.58933	12.292	0.30036	3	228	0.07331	5.57119	0.98138	0.94532	0.02496	0.00472	0.89631	0.04428	0.00837	0.99856	0.00063
Left-Inf-Lat-Vent	387.786	318.673	387.286	319.381	-0.5	-0.12902	47.7109	12.3114	9.01652	2.32663	-113	164	-29.1586	42.3187	-8	29.5714	7.63063	37.0099	9.55007	6.99422	1.80479	1	164	0.25804	42.3187	0.98921	0.87789	0.0723	0.01366	0.78236	0.10578	0.01999	0.95619	0.01946
Left-Lateral-Ventricle	8935.46	6699.95	8911.54	6694.29	-23.9286	-0.26815	107.696	1.20688	20.3526	0.22808	-329	218	-3.68689	2.44299	-1.5	70.9286	0.79485	83.5167	0.93592	15.7832	0.17687	1	329	0.01121	3.68689	0.99987	0.97888	0.01999	0.00378	0.95863	0.03674	0.00694	0.24998	0.6021
Left-Pallidum	1618.29	388.615	1628.29	379.308	10	0.61603	139.831	8.6141	26.4257	1.62791	-351	530	-21.6228	32.6498	0	75.7857	4.66866	117.048	7.21058	22.1201	1.36267	6	530	0.36962	32.6498	0.93566	0.9213	0.07714	0.01458	0.85409	0.11885	0.02246	0.70808	0.14992
Left-Putamen	6203.07	742.915	6204.04	784.507	0.96429	0.01554	176.218	2.84059	33.302	0.53682	-198	763	-3.19172	12.2994	-4	95.6786	1.54232	146.834	2.36693	27.749	0.44731	0	763	0	12.2994	0.97434	0.96476	0.01923	0.00363	0.93192	0.03529	0.00667	0.97711	0.01006
Left-Thalamus-Proper	7263.39	931.323	7292.82	901.343	29.4286	0.40434	138.986	1.90964	26.2659	0.36089	-283	349	-3.88837	4.7952	11	98.9286	1.35926	100.329	1.3785	18.9603	0.26051	2	349	0.02748	4.7952	0.9884	0.97124	0.0152	0.00287	0.94409	0.02857	0.0054	0.27241	0.56478
Left-VentralDC	3883.79	421.232	3854.93	428.865	-28.8571	-0.74579	94.0944	2.43178	17.7822	0.45956	-338	87	-8.7353	2.24844	-12.5	69.5714	1.79801	68.5411	1.77138	12.953	0.33476	2	338	0.05169	8.7353	0.97409	0.94187	0.03371	0.00637	0.89013	0.05794	0.01095	0.11625	0.93461
Left-choroid-plexus	1641.14	330.676	1635.89	344.367	-5.25	-0.32041	86.5896	5.28463	16.3639	0.9987	-195	206	-11.901	12.5723	-5.5	66.5357	4.06073	54.179	3.30659	10.2389	0.62489	6	206	0.36618	12.5723	0.96814	0.88259	0.05779	0.01092	0.78986	0.08919	0.01686	0.75081	0.12447
Left-vessel	85.1786	51.2648	83.4643	49.4507	-1.71429	-2.03304	9.89522	11.7351	1.87002	2.21773	-33	10	-39.136	11.8594	0.5	6.78571	8.04744	7.29463	8.65098	1.37856	1.63488	0	33	0	39.136	0.98081	0.91402	0.06463	0.01221	0.84165	0.10599	0.02003	0.36741	0.43485
Optic-Chiasm	198.75	87.4717	196.286	96.2077	-2.46429	-1.24763	71.7348	36.3182	13.5566	6.86349	-151	232	-76.4488	117.458	-4.5	44.5357	22.5477	55.6354	28.1673	10.5141	5.32311	1	232	0.50628	117.458	0.7046	0.8124	0.22095	0.04176	0.68407	0.2505	0.04734	0.85712	0.06696
Right-Accumbens-area	679.857	118.983	698.714	103.983	18.8571	2.73575	45.4693	6.59659	8.5929	1.24664	-93	100	-13.4922	14.5078	10	35.7143	5.18135	33.3687	4.84106	6.30609	0.91487	0	100	0	14.5078	0.90644	0.90933	0.04988	0.00943	0.83373	0.08091	0.01529	0.03698	1.43202
Right-Amygdala	1794.75	359.985	1815.54	338.89	20.7857	1.15147	84.8853	4.70241	16.0418	0.88867	-180	209	-9.97151	11.578	4	60.4286	3.34758	62.1828	3.44476	11.7514	0.651	0	209	0	11.578	0.96982	0.93408	0.03023	0.00571	0.87631	0.05187	0.0098	0.20604	0.68605
Right-Caudate	4053.39	570.375	4108.39	584.445	55	1.34774	127.121	3.11504	24.0237	0.58869	-49	626	-1.20072	15.3398	16.5	68.7143	1.68381	120.001	2.94057	22.6781	0.55572	0	626	0	15.3398	0.97215	0.96393	0.0251	0.00474	0.93036	0.04467	0.00844	0.0301	1.52144
Right-Cerebellum-Cortex	47685.1	7335.3	47682.8	7266.3	-2.32143	-0.00487	653.568	1.37062	123.513	0.25902	-1683	1161	-3.52949	2.43478	77.5	454.036	0.95218	461.924	0.96872	87.2954	0.18307	8	1683	0.01678	3.52949	0.99614	0.96326	0.0207	0.00391	0.92912	0.03826	0.00723	0.98514	0.0065
Right-Cerebellum-White-Matter	16197.1	2708.19	15852.5	2656.51	-344.679	-2.15091	785.383	4.90105	148.423	0.92621	-3467	277	-21.6352	1.72857	-18	408.75	2.55073	752.838	4.69796	142.273	0.88783	1	3467	0.00624	21.6352	0.95058	0.96358	0.02475	0.00468	0.92973	0.04496	0.0085	0.028	1.55282
Right-Cerebral-Cortex	260697	35003.8	261992	35927	1295.68	0.49577	4257.06	1.62891	804.508	0.30783	-5635	16986	-2.15616	6.49947	0.5	2136.54	0.81752	3889.69	1.48834	735.082	0.28127	7	16986	0.00268	6.49947	0.99239	0.97147	0.02004	0.00379	0.94452	0.03694	0.00698	0.11891	0.92476
Right-Cerebral-White-Matter	210722	31303.1	210766	32067.9	44	0.02088	2653.91	1.2593	501.541	0.23799	-6104	9033	-2.8964	4.28624	25.5	1352.29	0.64167	2269.1	1.07671	428.82	0.20348	1	9033	0.00047	4.28624	0.99662	0.98381	0.01227	0.00232	0.96813	0.02341	0.00442	0.93074	0.03117
Right-Hippocampus	4174.86	506.921	4201.5	507.353	26.6429	0.63614	118.458	2.82838	22.3864	0.53451	-90	532	-2.14891	12.7024	-1.5	61.0714	1.45819	104.406	2.49286	19.7308	0.47111	0	532	0	12.7024	0.97232	0.95278	0.02238	0.00423	0.90981	0.04007	0.00757	0.24435	0.61198
Right-Inf-Lat-Vent	331.929	269.206	336.25	291.104	4.32143	1.2935	30.7126	9.19293	5.80413	1.7373	-46	105	-13.7688	31.4287	1.5	21.25	6.36058	22.2338	6.65505	4.2018	1.25769	0	105	0	31.4287	0.9941	0.91261	0.04802	0.00908	0.83926	0.07698	0.01455	0.46298	0.33444
Right-Lateral-Ventricle	7880.89	4393.71	7905.46	4342.68	24.5714	0.3113	123.813	1.56861	23.3985	0.29644	-362	379	-4.58624	4.80161	28.5	76.6429	0.971	99.3181	1.25828	18.7694	0.23779	1	379	0.01267	4.80161	0.9996	0.97614	0.0254	0.0048	0.95339	0.04468	0.00844	0.30297	0.5186
Right-Pallidum	1418.04	324.59	1447.82	279.141	29.7857	2.07866	202.331	14.1201	38.237	2.66845	-411	804	-28.6825	56.1089	-9.5	99.5714	6.94881	177.697	12.401	33.5816	2.34356	4	804	0.27915	56.1089	0.77943	0.89821	0.09591	0.01813	0.81523	0.14113	0.02667	0.44277	0.35382
Right-Putamen	5857.61	730.038	5865.75	740.357	8.14286	0.13892	202.329	3.45172	38.2366	0.65231	-279	657	-4.75973	11.2084	-19.5	116.429	1.98627	164.159	2.80054	31.0231	0.52925	1	657	0.01706	11.2084	0.9634	0.96131	0.02249	0.00425	0.9255	0.04131	0.00781	0.83296	0.07938
Right-Thalamus-Proper	7373.79	1001.9	7432.46	973.514	58.6786	0.79262	188.893	2.55153	35.6974	0.48219	-264	690	-3.56606	9.32039	12.5	115.607	1.5616	159.346	2.15242	30.1136	0.40677	3	690	0.04052	9.32039	0.98062	0.97289	0.01475	0.00279	0.94721	0.02757	0.00521	0.11182	0.95149
Right-VentralDC	3846.39	405.187	3850.32	404.978	3.92857	0.10208	61.0561	1.58655	11.5385	0.29983	-187	113	-4.85922	2.93632	4.5	45.2143	1.1749	40.2965	1.04711	7.61531	0.19788	1	187	0.02599	4.85922	0.989	0.94443	0.03285	0.00621	0.89471	0.05695	0.01076	0.73613	0.13304
Right-choroid-plexus	1796	412.284	1752.43	415.279	-43.5714	-2.45582	125.971	7.10012	23.8063	1.3418	-528	158	-29.7597	8.90535	-24.5	82.7143	4.66202	103.646	5.8418	19.5873	1.104	13	528	0.73272	29.7597	0.94987	0.88403	0.05993	0.01133	0.79217	0.09112	0.01722	0.07827	1.10638
Right-vessel	62.7143	46.1245	62.6429	46.9501	-0.07143	-0.11396	10.708	17.084	2.02362	3.22857	-24	24	-38.2906	38.2906	0.5	7.42857	11.8519	7.57886	12.0916	1.43227	2.2851	0	24	0	38.2906	0.97446	0.88319	0.10901	0.0206	0.79082	0.15445	0.02919	0.9721	0.01229
ctx-lh-bankssts	2517.75	504.165	2478.93	493.667	-38.8214	-1.55389	203.321	8.13824	38.424	1.53798	-674	248	-26.9779	9.92659	5	138.679	5.55083	151.52	6.06482	28.6345	1.14614	8	674	0.32021	26.9779	0.91691	0.86952	0.07302	0.0138	0.76916	0.10077	0.01904	0.3213	0.49309
ctx-lh-caudalanteriorcingulate	2048.43	644.76	1996.61	626.087	-51.8214	-2.56222	117.429	5.80608	22.192	1.09725	-333	170	-16.4646	8.40536	-46.5	98.9643	4.89312	80.1113	3.96097	15.1396	0.74855	0	333	0	16.4646	0.98024	0.8841	0.02784	0.00526	0.79227	0.04365	0.00825	0.02722	1.56517
ctx-lh-caudalmiddlefrontal	7289.04	1105.34	7282.43	1017.4	-6.60714	-0.09069	438.46	6.01807	82.8612	1.13731	-677	1767	-9.29213	24.2529	-60.5	277.036	3.80244	335.71	4.60778	63.4433	0.87079	4	1767	0.0549	24.2529	0.91772	0.92714	0.05025	0.0095	0.86418	0.07638	0.01443	0.93703	0.02824
ctx-lh-cuneus	2908.71	407.293	2947.68	404.828	38.9643	1.33066	185.239	6.32605	35.0069	1.19551	-383	663	-13.0797	22.6419	14	132.464	4.52375	133.009	4.54235	25.1363	0.85842	2	663	0.0683	22.6419	0.89511	0.85861	0.03798	0.00718	0.75225	0.05568	0.01052	0.2755	0.55988
ctx-lh-entorhinal	1775.61	515.28	1689.14	394.843	-86.4643	-4.99108	343.009	19.7999	64.8227	3.74184	-1329	252	-76.7155	14.5465	-6.5	225.25	13.0024	269.799	15.574	50.9873	2.9432	1	1329	0.05772	76.7155	0.71415	0.80389	0.08484	0.01603	0.67209	0.11077	0.02093	0.19339	0.71356
ctx-lh-frontalpole	684.964	174.773	684.571	168.34	-0.39286	-0.05737	80.5331	11.7606	15.2193	2.22255	-148	166	-21.6132	24.2418	15.5	64.5357	9.42447	46.547	6.79749	8.79657	1.28461	3	166	0.4381	24.2418	0.89358	0.84486	0.05264	0.00995	0.7314	0.07829	0.01479	0.9796	0.00895
ctx-lh-fusiform	8819.54	1707.85	8913.11	1872.54	93.5714	1.05536	506.845	5.71652	95.7847	1.08032	-1506	913	-16.9856	10.2974	146	381.643	4.30441	339.008	3.82354	64.0664	0.72258	4	1506	0.04511	16.9856	0.96007	0.88308	0.04271	0.00807	0.79063	0.06514	0.01231	0.33729	0.47199
ctx-lh-inferiorparietal	12031.9	2669.67	12136.3	2310.94	104.429	0.86418	893.952	7.39777	168.941	1.39805	-2103	2309	-17.4031	19.1078	-74	518.643	4.29195	729.044	6.0331	137.776	1.14015	3	2309	0.02483	19.1078	0.93727	0.92792	0.03232	0.00611	0.86554	0.0535	0.01011	0.54166	0.26627
ctx-lh-inferiortemporal	9053.11	2126.73	9095.89	2067.4	42.7857	0.47149	524.322	5.77798	99.0876	1.09193	-1170	1315	-12.8933	14.4912	118.5	400.429	4.41268	332.462	3.66369	62.8293	0.69237	33	1315	0.36366	14.4912	0.96964	0.88871	0.04601	0.00869	0.79972	0.06943	0.01312	0.66932	0.17437
ctx-lh-insula	6405.11	829.362	6405.32	797.445	0.21429	0.00335	118.456	1.84936	22.386	0.3495	-312	191	-4.87103	2.98195	-8	93.4286	1.45863	70.5662	1.1017	13.3358	0.2082	7	312	0.10929	4.87103	0.98978	0.92581	0.01518	0.00287	0.86187	0.02627	0.00496	0.99243	0.0033
ctx-lh-isthmuscingulate	2454.64	397.395	2377.79	415.596	-76.8571	-3.18089	119.548	4.94775	22.5925	0.93504	-402	111	-16.6376	4.59396	-55	101.071	4.18305	99.1149	4.10208	18.731	0.77522	4	402	0.16555	16.6376	0.94094	0.86462	0.02729	0.00516	0.76152	0.0416	0.00786	0.0021	2.67775
ctx-lh-lateraloccipital	11777.1	1731.47	11793.9	1859.08	16.8571	0.14303	963.862	8.17838	182.153	1.54557	-3626	2406	-30.7666	20.4149	20	524.857	4.45341	802.277	6.80732	151.616	1.28646	3	3626	0.02546	30.7666	0.8608	0.9048	0.04032	0.00762	0.82615	0.0634	0.01198	0.92695	0.03294
ctx-lh-lateralorbitofrontal	8033.5	1205.87	8027.71	1129.68	-5.78571	-0.07205	228.411	2.84425	43.1656	0.53751	-767	390	-9.55096	4.85642	-11.5	164	2.04219	155.93	1.94169	29.4679	0.36695	9	767	0.11207	9.55096	0.98156	0.92216	0.01688	0.00319	0.85557	0.0285	0.00539	0.89437	0.04848
ctx-lh-lingual	6438	1023.56	6450.68	1102.3	12.6786	0.19674	477.179	7.40462	90.1783	1.39934	-1695	1129	-26.3022	17.5192	24	289.821	4.4973	375.178	5.82183	70.9021	1.10022	20	1695	0.31035	26.3022	0.90272	0.87817	0.04451	0.00841	0.78281	0.06615	0.0125	0.88923	0.05098
ctx-lh-medialorbitofrontal	4428.29	598.462	4445.5	760.186	17.2143	0.38798	383.491	8.64324	72.473	1.63342	-701	1369	-15.7993	30.8549	-30.5	253.143	5.70541	284.461	6.41127	53.7581	1.21162	5	1369	0.11269	30.8549	0.84778	0.88768	0.02786	0.00526	0.79804	0.04475	0.00846	0.81404	0.08935
ctx-lh-middletemporal	9817.43	1794.5	9937.75	1754.13	120.321	1.21813	501.123	5.07333	94.7034	0.95877	-1287	1021	-13.0295	10.3365	132	403.393	4.08392	312.066	3.15933	58.9749	0.59706	47	1287	0.47582	13.0295	0.95926	0.90086	0.04008	0.00757	0.81961	0.06313	0.01193	0.21474	0.66808
ctx-lh-paracentral	4036.75	729.616	4062.29	730.687	25.5357	0.63059	207.942	5.13498	39.2973	0.97042	-211	793	-5.2105	19.5826	-53.5	138.964	3.43163	154.563	3.81683	29.2097	0.72131	6	793	0.14817	19.5826	0.96027	0.92034	0.02821	0.00533	0.85243	0.04591	0.00868	0.52131	0.28291
ctx-lh-parahippocampal	2306.75	357.812	2221.71	365.575	-85.0357	-3.75561	253.175	11.1815	47.8457	2.11311	-748	284	-33.0355	12.5429	-46	195.393	8.62954	178.898	7.90102	33.8085	1.49315	17	748	0.75081	33.0355	0.73863	0.84256	0.06561	0.0124	0.72795	0.08815	0.01666	0.08679	1.06154
ctx-lh-parsopercularis	5129.64	711.514	5113.04	692.02	-16.6071	-0.32427	270.626	5.28429	51.1436	0.99864	-1094	564	-21.3616	11.0127	13	151.25	2.95333	223.161	4.35747	42.1735	0.82349	5	1094	0.09763	21.3616	0.92795	0.92228	0.02008	0.00379	0.85576	0.03377	0.00638	0.7479	0.12616
ctx-lh-parsorbitalis	2424.29	524.875	2459.18	614.103	34.8929	1.42902	201.784	8.26397	38.1336	1.56174	-354	670	-14.4979	27.4395	7	143.25	5.86674	143.871	5.89216	27.189	1.11351	28	670	1.14673	27.4395	0.93796	0.89638	0.03536	0.00668	0.81221	0.05684	0.01074	0.36828	0.43382
ctx-lh-parstriangularis	3674.32	667.441	3785.68	750.659	111.357	2.98545	325.887	8.7369	61.5868	1.65112	-291	1317	-7.80161	35.3083	36.5	219.857	5.89429	262.553	7.03896	49.6179	1.33024	14	1317	0.37534	35.3083	0.88669	0.90671	0.03227	0.0061	0.82934	0.05151	0.00973	0.08174	1.08758
ctx-lh-pericalcarine	2031.07	423.005	2079.54	411.93	48.4643	2.35801	286.92	13.96	54.2227	2.63818	-550	956	-26.76	46.5138	-2.5	191.036	9.29477	216.593	10.5382	40.9321	1.99154	2	956	0.09731	46.5138	0.76536	0.83457	0.06856	0.01296	0.7161	0.09468	0.01789	0.37933	0.42099
ctx-lh-postcentral	10639.7	1585.33	10585.1	1692.08	-54.6071	-0.51456	498.68	4.69903	94.2417	0.88803	-2228	1155	-20.9943	10.8835	-18	220.75	2.08011	448.597	4.22709	84.7768	0.79885	1	2228	0.00942	20.9943	0.95482	0.92951	0.03378	0.00638	0.86831	0.05503	0.0104	0.5671	0.24634
ctx-lh-posteriorcingulate	3698.93	690.723	3734.82	687.779	35.8929	0.96567	133.182	3.58317	25.169	0.67716	-215	351	-5.78443	9.44342	16.5	95.75	2.57609	97.805	2.63138	18.4834	0.49728	0	351	0	9.44342	0.98065	0.88896	0.01931	0.00365	0.80011	0.03139	0.00593	0.16531	0.78171
ctx-lh-precentral	14571.4	2116.76	14516.1	2018.43	-55.2143	-0.37964	344.92	2.37161	65.1838	0.44819	-1438	373	-9.88741	2.56468	26	195.429	1.34373	287.271	1.97522	54.2891	0.37328	1	1438	0.00688	9.88741	0.98623	0.94643	0.01454	0.00275	0.89831	0.02577	0.00487	0.40441	0.39318
ctx-lh-precuneus	10033.3	1538.77	10189.7	1532.98	156.357	1.54633	309.296	3.05885	58.4514	0.57807	-314	1135	-3.10538	11.2248	114.5	243.5	2.40815	243.985	2.41294	46.1088	0.456	9	1135	0.08901	11.2248	0.97532	0.92229	0.0162	0.00306	0.8558	0.02766	0.00523	0.01254	1.9018
ctx-lh-rostralanteriorcingulate	2291.07	628.568	2269	601.835	-22.0714	-0.96803	80.9851	3.55192	15.3048	0.67125	-191	126	-8.37706	5.52623	-22	66.2143	2.90409	50.1703	2.20042	9.4813	0.41584	6	191	0.26315	8.37706	0.99101	0.88739	0.0206	0.00389	0.79758	0.03301	0.00624	0.16077	0.79381
ctx-lh-rostralmiddlefrontal	16146.7	3458.06	16250.7	3805.97	104.036	0.64225	1090.56	6.73242	206.097	1.27231	-2512	4722	-15.5074	29.1505	-25	531.893	3.28355	952.453	5.87981	179.997	1.11118	4	4722	0.02469	29.1505	0.95619	0.92909	0.03122	0.0059	0.86757	0.05065	0.00957	0.6178	0.20915
ctx-lh-superiorfrontal	24149.6	3161.42	24027	2748.06	-122.607	-0.50899	791.648	3.28644	149.607	0.62108	-3348	1468	-13.8988	6.09423	-18	429.607	1.78347	671.489	2.78761	126.9	0.52681	2	3348	0.0083	13.8988	0.96469	0.94926	0.01404	0.00265	0.90341	0.02494	0.00471	0.41966	0.3771
ctx-lh-superiorparietal	13899	2178.22	13960.9	2171.02	61.9643	0.44483	616.111	4.42293	116.434	0.83585	-1115	2573	-8.00434	18.471	40	335.321	2.4072	516.692	3.70921	97.6455	0.70098	12	2573	0.08615	18.471	0.96087	0.93402	0.02365	0.00447	0.87621	0.04011	0.00758	0.59895	0.22261
ctx-lh-superiortemporal	12153.5	1992.71	12238.6	2061.54	85.0714	0.69753	273.82	2.24516	51.7471	0.42429	-543	630	-4.45227	5.16561	103	217.786	1.78571	182.47	1.49614	34.4836	0.28274	5	630	0.041	5.16561	0.99033	0.92182	0.02925	0.00553	0.85497	0.04794	0.00906	0.11178	0.95165
ctx-lh-supramarginal	11092.5	1753.02	11111.3	1835.01	18.7857	0.16921	468.434	4.21939	88.5256	0.79739	-1659	784	-14.9434	7.06184	91.5	320.929	2.89075	336.134	3.02771	63.5234	0.57218	34	1659	0.30625	14.9434	0.96707	0.92884	0.03031	0.00573	0.86714	0.05015	0.00948	0.83354	0.07907
ctx-lh-temporalpole	1989.71	387.065	2051.71	337.534	62	3.06822	263.786	13.0541	49.8508	2.46699	-684	781	-33.8494	38.6497	40	182.5	9.03146	197.559	9.77667	37.3351	1.84762	2	781	0.09897	38.6497	0.73172	0.84624	0.06642	0.01255	0.73346	0.09389	0.01774	0.2243	0.64918
ctx-lh-transversetemporal	1246.14	272.155	1258.93	286.362	12.7857	1.02079	96.1921	7.67979	18.1786	1.45134	-149	313	-11.8959	24.9893	3.5	72	5.74834	63.6117	5.07863	12.0215	0.95977	4	313	0.31935	24.9893	0.94175	0.87317	0.03081	0.00582	0.77489	0.04857	0.00918	0.48787	0.3117
ctx-rh-bankssts	2360.54	447.275	2333.43	455.363	-27.1071	-1.15498	149.174	6.35601	28.1913	1.20117	-529	206	-22.5396	8.77723	-27.5	109.821	4.67926	102.506	4.36758	19.3719	0.8254	1	529	0.04261	22.5396	0.94552	0.88714	0.02992	0.00566	0.79717	0.04731	0.00894	0.34481	0.46242
ctx-rh-caudalanteriorcingulate	2272.18	632.609	2233.32	600.257	-38.8571	-1.72488	155.14	6.88669	29.3187	1.30146	-625	171	-27.7439	7.59072	-12	99.8571	4.43268	123.667	5.48959	23.3708	1.03743	1	625	0.04439	27.7439	0.96751	0.88956	0.03083	0.00583	0.80109	0.04919	0.0093	0.19617	0.70738
ctx-rh-caudalmiddlefrontal	6941.04	1531.92	6998.68	1440.79	57.6429	0.82703	335.045	4.80706	63.3176	0.90845	-522	1170	-7.48939	16.7866	31.5	207.857	2.98223	266.263	3.82021	50.319	0.72195	7	1170	0.10043	16.7866	0.97477	0.93382	0.02041	0.00386	0.87586	0.03513	0.00664	0.37068	0.431
ctx-rh-cuneus	3123.79	495.806	3168.04	526.836	44.25	1.40659	141.653	4.50276	26.7699	0.85094	-240	419	-7.62895	13.3189	31	112.179	3.56585	95.1105	3.02331	17.9742	0.57135	3	419	0.09536	13.3189	0.95934	0.86046	0.03296	0.00623	0.75509	0.04981	0.00941	0.10992	0.95893
ctx-rh-entorhinal	1600.25	398.45	1561.21	364.397	-39.0357	-2.46947	255.969	16.193	48.3735	3.0602	-644	584	-40.7406	36.9449	-26	197.536	12.4965	163.201	10.3244	30.8421	1.95113	18	644	1.13871	40.7406	0.77776	0.78033	0.10851	0.02051	0.63979	0.13101	0.02476	0.42674	0.36984
ctx-rh-frontalpole	900.071	164.141	882.536	146.322	-17.5357	-1.96742	123.085	13.8095	23.2609	2.60976	-445	291	-49.9269	32.6488	1	77.9643	8.74722	95.7352	10.741	18.0922	2.02986	0	445	0	49.9269	0.69076	0.84535	0.06028	0.01139	0.73213	0.08503	0.01607	0.45745	0.33966
ctx-rh-fusiform	8665.57	1566.2	8667.5	1503.51	1.92857	0.02225	418.411	4.82789	79.0722	0.91239	-793	1034	-9.15014	11.9309	-67.5	334.643	3.86132	242.772	2.80126	45.8796	0.52939	36	1034	0.41539	11.9309	0.96416	0.88611	0.03421	0.00647	0.7955	0.05353	0.01012	0.98072	0.00845
ctx-rh-inferiorparietal	14819.9	2666.72	14704	2530.83	-115.821	-0.78459	547.027	3.70566	103.378	0.7003	-1145	1081	-7.75643	7.32288	-86.5	424.607	2.87636	355.22	2.40632	67.1303	0.45475	1	1145	0.00677	7.75643	0.97766	0.93667	0.01361	0.00257	0.88089	0.0239	0.00452	0.27243	0.56475
ctx-rh-inferiortemporal	9105.86	2770.17	9320.61	2813.22	214.75	2.33089	654.646	7.10549	123.716	1.34281	-673	2449	-7.30471	26.5813	131.5	486.25	5.27774	480.823	5.21883	90.8669	0.98627	5	2449	0.05427	26.5813	0.97056	0.89279	0.03672	0.00694	0.80635	0.05773	0.01091	0.094	1.02689
ctx-rh-insula	6149.89	812.358	6143.75	800.767	-6.14286	-0.09994	127.061	2.06711	24.0123	0.39065	-219	326	-3.56282	5.30355	-2	100.071	1.62802	76.148	1.23882	14.3906	0.23411	10	326	0.16269	5.30355	0.988	0.92184	0.01597	0.00302	0.85501	0.02751	0.0052	0.80003	0.09689
ctx-rh-isthmuscingulate	2343.79	420.019	2340.75	456.789	-3.03571	-0.12961	185.99	7.94058	35.1488	1.50063	-570	481	-24.3354	20.5357	22	127.679	5.45107	133.027	5.67941	25.1397	1.07331	8	570	0.34155	24.3354	0.91321	0.85143	0.04216	0.00797	0.7413	0.05924	0.0112	0.93181	0.03067
ctx-rh-lateraloccipital	11522	1723.65	11433.9	1853.57	-88.0357	-0.767	436.305	3.80124	82.4539	0.71837	-1503	886	-13.0947	7.71915	-60	293.321	2.55552	330.417	2.87871	62.4429	0.54402	17	1503	0.14811	13.0947	0.97014	0.91146	0.02571	0.00486	0.83732	0.04237	0.00801	0.29511	0.53001
ctx-rh-lateralorbitofrontal	7511.71	1115.15	7548.89	1091.06	37.1786	0.49372	217.148	2.88366	41.0371	0.54496	-452	596	-6.00241	7.91469	75.5	179.893	2.38892	122.584	1.62787	23.1661	0.30764	9	596	0.11952	7.91469	0.98075	0.92159	0.01496	0.00283	0.85458	0.02563	0.00484	0.37296	0.42833
ctx-rh-lingual	6298.29	932.529	6368	935.032	69.7143	1.10078	263.091	4.15419	49.7195	0.78507	-415	735	-6.55283	11.6056	33.5	194.929	3.07791	186.688	2.94779	35.2807	0.55708	7	735	0.11053	11.6056	0.95897	0.88075	0.02763	0.00522	0.78691	0.04345	0.00821	0.17226	0.76381
ctx-rh-medialorbitofrontal	4599.96	872.081	4807.5	800.04	207.536	4.41215	332.561	7.07015	62.8481	1.33613	-641	870	-13.6275	18.496	189.5	296.893	6.31186	252.691	5.37215	47.7542	1.01524	7	870	0.14882	18.496	0.89458	0.89689	0.02891	0.00546	0.81305	0.04629	0.00875	0.00271	2.56771
ctx-rh-middletemporal	10860.9	1977.76	10931.9	1680.65	71.0357	0.65192	490.545	4.50191	92.7043	0.85078	-1751	647	-16.0696	5.93775	100.5	323.821	2.97183	370.302	3.3984	69.9805	0.64224	10	1751	0.09177	16.0696	0.96479	0.91178	0.02681	0.00507	0.83787	0.04371	0.00826	0.45017	0.34662
ctx-rh-paracentral	4711.25	736.074	4652.71	798.859	-58.5357	-1.25023	202.879	4.33318	38.3405	0.81889	-561	297	-11.9821	6.34347	-32.5	155.464	3.32048	140.174	2.9939	26.4904	0.56579	2	561	0.04272	11.9821	0.96349	0.91999	0.02098	0.00396	0.85183	0.03529	0.00667	0.13846	0.85868
ctx-rh-parahippocampal	2169.79	338.002	2144.36	344.976	-25.4286	-1.17885	143.817	6.66723	27.1788	1.25999	-466	191	-21.6034	8.8546	-54.5	115.357	5.34786	86.9121	4.02917	16.4248	0.76144	14	466	0.64903	21.6034	0.9117	0.86496	0.04245	0.00802	0.76206	0.06333	0.01197	0.35777	0.44639
ctx-rh-parsopercularis	4275.32	942.702	4265.82	916.04	-9.5	-0.22245	222.279	5.20491	42.0069	0.98364	-483	672	-11.31	15.7356	-18	151.857	3.5559	159.959	3.74562	30.2295	0.70786	3	672	0.07025	15.7356	0.97236	0.91198	0.01902	0.00359	0.8382	0.03165	0.00598	0.82279	0.08471
ctx-rh-parsorbitalis	2758.82	403.494	2778.18	410.485	19.3571	0.69919	158.338	5.71926	29.923	1.08084	-367	391	-13.2563	14.1232	42.5	122.071	4.4093	100.03	3.61316	18.904	0.68282	20	391	0.72241	14.1232	0.92584	0.90562	0.02477	0.00468	0.82752	0.04014	0.00759	0.52316	0.28137
ctx-rh-parstriangularis	4264.18	958.983	4283.79	959.395	19.6071	0.45876	191.93	4.49067	36.2714	0.84866	-251	759	-5.87274	17.7586	-7	129.321	3.02578	141.041	3.29998	26.6542	0.62364	11	759	0.25737	17.7586	0.98048	0.9212	0.02326	0.0044	0.85391	0.03858	0.00729	0.59324	0.22677
ctx-rh-pericalcarine	2454.29	471.28	2479.75	520.181	25.4643	1.03219	283.275	11.4825	53.5339	2.16998	-545	1019	-22.0914	41.3049	3	182.179	7.38457	215.636	8.74075	40.7513	1.65185	26	1019	1.0539	41.3049	0.84127	0.84553	0.05451	0.0103	0.73239	0.07511	0.01419	0.63814	0.19509
ctx-rh-postcentral	9825.14	1525.74	9784.86	1530.11	-40.2857	-0.41087	273.622	2.79063	51.7096	0.52738	-620	453	-6.3233	4.62009	39.5	211.857	2.16071	173.223	1.76668	32.736	0.33387	4	620	0.0408	6.3233	0.98419	0.93079	0.01357	0.00256	0.87055	0.02354	0.00445	0.44271	0.35388
ctx-rh-posteriorcingulate	3580.61	681.112	3518.89	612.127	-61.7143	-1.73855	128.612	3.62313	24.3054	0.68471	-333	361	-9.38094	10.1697	-76.5	107.357	3.02436	92.4034	2.6031	17.4626	0.49194	2	361	0.05634	10.1697	0.97648	0.88811	0.02034	0.00384	0.79874	0.03231	0.00611	0.01719	1.76484
ctx-rh-precentral	14011.1	1746.87	14050.4	1885.93	39.3571	0.28051	327.284	2.33262	61.8509	0.44082	-457	952	-3.25713	6.7851	-16.5	234.714	1.67286	227.135	1.61883	42.9244	0.30593	4	952	0.02851	6.7851	0.98413	0.94538	0.00792	0.0015	0.89641	0.01425	0.00269	0.52992	0.27579
ctx-rh-precuneus	10835.7	1752.76	10792.6	1747.19	-43.1429	-0.39895	320.452	2.96327	60.5597	0.56	-1273	549	-11.7716	5.07669	-12.5	206.5	1.90954	245.76	2.27258	46.4443	0.42948	5	1273	0.04624	11.7716	0.98353	0.92125	0.01693	0.0032	0.854	0.02861	0.00541	0.48233	0.31666
ctx-rh-rostralanteriorcingulate	1812.82	365.522	1838.79	378.612	25.9643	1.42207	124.743	6.83222	23.5742	1.29117	-240	479	-13.1449	26.235	17.5	79.75	4.36794	98.307	5.38431	18.5783	1.01754	5	479	0.27385	26.235	0.9434	0.8696	0.04783	0.00904	0.76928	0.07098	0.01341	0.28045	0.55214
ctx-rh-rostralmiddlefrontal	16660.9	3107.91	16690.7	3269.58	29.8214	0.17883	451.476	2.70737	85.3209	0.51165	-1254	819	-7.51988	4.91131	101	344.893	2.06822	285.3	1.71086	53.9166	0.32332	38	1254	0.22788	7.51988	0.9903	0.93722	0.01474	0.00279	0.88185	0.02567	0.00485	0.72941	0.13703
ctx-rh-superiorfrontal	23777.4	3958.97	23784.8	3877.41	7.39286	0.03109	279.432	1.17502	52.8077	0.22206	-598	543	-2.51461	2.28333	36	225.536	0.94838	159.338	0.67002	30.112	0.12662	12	598	0.05046	2.51461	0.99755	0.9525	0.00803	0.00152	0.9093	0.01459	0.00276	0.8897	0.05076
ctx-rh-superiorparietal	14154.9	2404.83	14134.1	2262.6	-20.7857	-0.14695	329.77	2.33143	62.3206	0.4406	-1000	816	-7.06989	5.76903	8	201.357	1.42357	259.133	1.83204	48.9715	0.34622	6	1000	0.04242	7.06989	0.99034	0.93715	0.01244	0.00235	0.88173	0.02186	0.00413	0.74131	0.13
ctx-rh-superiortemporal	11489.6	1723.07	11501.1	1673.64	11.4286	0.09942	274.808	2.3906	51.9339	0.45178	-973	517	-8.46429	4.49747	66.5	187.643	1.63234	197.841	1.72105	37.3884	0.32525	5	973	0.0435	8.46429	0.98735	0.93833	0.01265	0.00239	0.88382	0.02231	0.00422	0.82748	0.08224
ctx-rh-supramarginal	10467.2	1651.71	10456.1	1614.08	-11.1071	-0.10617	319.976	3.05856	60.4697	0.57801	-795	807	-7.5992	7.71391	-24	235.036	2.24665	212.66	2.03277	40.1891	0.38416	23	807	0.21985	7.71391	0.98146	0.93273	0.01595	0.00301	0.87394	0.02756	0.00521	0.85564	0.06771
ctx-rh-temporalpole	1885.11	469.205	1919.89	445.799	34.7857	1.82842	232.01	12.195	43.8458	2.30464	-380	648	-19.9737	34.0605	29	172.929	9.08954	155.151	8.15509	29.3207	1.54117	1	648	0.05256	34.0605	0.87309	0.8211	0.12729	0.02406	0.6965	0.15078	0.0285	0.43448	0.36203
ctx-rh-transversetemporal	917.179	200.885	927.464	214.919	10.2857	1.1152	47.6257	5.16368	9.00042	0.97584	-92	100	-9.97483	10.8422	-1.5	36.4286	3.94966	31.6502	3.43158	5.98133	0.64851	0	100	0	10.8422	0.97351	0.86196	0.03145	0.00594	0.7574	0.04854	0.00917	0.26315	0.57979
wm-lh-bankssts	2798.04	535.778	2775.93	550.527	-22.1071	-0.79323	251.855	9.03685	47.5962	1.7078	-1069	392	-38.3569	14.0654	-12.5	139.107	4.99132	209.453	7.5154	39.5829	1.42028	7	1069	0.25117	38.3569	0.89537	0.91249	0.06582	0.01244	0.83907	0.09492	0.01794	0.64603	0.18975
wm-lh-caudalanteriorcingulate	2676.11	499.686	2644.11	499.054	-32	-1.20296	173.037	6.50489	32.7009	1.22931	-420	401	-15.7888	15.0746	-36.5	133.786	5.02934	111.544	4.19323	21.0799	0.79245	3	420	0.11278	15.7888	0.94005	0.91238	0.02624	0.00496	0.83888	0.04365	0.00825	0.33648	0.47304
wm-lh-caudalmiddlefrontal	6829.11	987.006	6787.21	860.49	-41.8929	-0.61533	381.235	5.59967	72.0466	1.05824	-1024	785	-15.0408	11.5303	-62.5	269.179	3.95376	268.364	3.9418	50.7161	0.74493	9	1024	0.13219	15.0408	0.91716	0.92717	0.04628	0.00875	0.86423	0.07333	0.01386	0.56575	0.24738
wm-lh-cuneus	2254.18	314.446	2280.04	309.605	25.8571	1.14053	127.394	5.61923	24.0752	1.06194	-370	298	-16.3204	13.1445	29.5	94.2857	4.15886	87.7698	3.87145	16.5869	0.73163	11	370	0.4852	16.3204	0.91622	0.8933	0.04532	0.00857	0.80718	0.06653	0.01257	0.29232	0.53414
wm-lh-entorhinal	781.75	274.663	765	237.373	-16.75	-2.16583	94.4868	12.2175	17.8563	2.30888	-184	185	-23.7918	23.9211	-41	82.3929	10.6537	46.6765	6.03542	8.82102	1.14059	3	185	0.38791	23.9211	0.93254	0.84846	0.09716	0.01836	0.73681	0.12916	0.02441	0.35654	0.44789
wm-lh-frontalpole	161.107	50.4603	156.179	38.1431	-4.92857	-3.10671	28.2829	17.828	5.34496	3.36918	-72	44	-45.385	27.7353	1.5	21.7857	13.7325	18.246	11.5013	3.44816	2.17354	0	72	0	45.385	0.80104	0.81337	0.06761	0.01278	0.68545	0.09512	0.01798	0.36464	0.43813
wm-lh-fusiform	6241.54	1133.33	6238.57	1155.87	-2.96429	-0.0475	217.907	3.49207	41.1805	0.65994	-470	311	-7.53199	4.98393	84	181.964	2.91607	114.696	1.83806	21.6755	0.34736	11	470	0.17628	7.53199	0.98252	0.90602	0.03133	0.00592	0.82819	0.05075	0.00959	0.94315	0.02542
wm-lh-inferiorparietal	9090.39	1782.25	9130.93	1402.41	40.5357	0.44493	909.712	9.98514	171.919	1.88701	-3326	2187	-36.5067	24.0049	-71	504.536	5.53786	751.861	8.25254	142.088	1.55958	16	3326	0.17562	36.5067	0.8441	0.93337	0.03638	0.00687	0.87507	0.06038	0.01141	0.81538	0.08864
wm-lh-inferiortemporal	5419.89	866.707	5404.36	806.961	-15.5357	-0.28705	294.272	5.43728	55.6122	1.02755	-570	471	-10.5319	8.70268	-6.5	249.464	4.60936	149.362	2.75977	28.2268	0.52155	6	570	0.11086	10.5319	0.94022	0.90153	0.04113	0.00777	0.82072	0.06291	0.01189	0.7821	0.10674
wm-lh-insula	8901.86	1139.69	8950.07	1106.46	48.2143	0.54016	310.292	3.47628	58.6396	0.65696	-733	1036	-8.212	11.6066	61.5	214.071	2.3983	226.203	2.53421	42.7483	0.47892	12	1036	0.13444	11.6066	0.96227	0.92727	0.01829	0.00346	0.86441	0.031	0.00586	0.41816	0.37866
wm-lh-isthmuscingulate	3190.75	475.454	3089.5	467.191	-101.25	-3.22439	157.293	5.00912	29.7255	0.94663	-384	352	-12.2288	11.2097	-74.5	134.536	4.28441	128.849	4.1033	24.3501	0.77545	1	384	0.03185	12.2288	0.92404	0.90119	0.03102	0.00586	0.82016	0.05008	0.00946	0.00208	2.68248
wm-lh-lateraloccipital	8400.82	1431.67	8424.29	1584.8	23.4643	0.27892	884.177	10.5102	167.094	1.98624	-2878	3298	-34.2108	39.2033	66.5	445.321	5.29353	759.398	9.02696	143.513	1.70593	39	3298	0.46359	39.2033	0.83411	0.91611	0.04157	0.00786	0.84521	0.06622	0.01251	0.88937	0.05092
wm-lh-lateralorbitofrontal	6814.39	811.959	6778.71	773.225	-35.6786	-0.52495	195.604	2.87798	36.9656	0.54389	-433	349	-6.37088	5.13496	-103.5	166.179	2.44504	104.608	1.53913	19.769	0.29087	0	433	0	6.37088	0.96964	0.94507	0.01253	0.00237	0.89586	0.02228	0.00421	0.34302	0.46468
wm-lh-lingual	5301.11	804.074	5337.14	818.853	36.0357	0.67747	396.94	7.46251	75.0147	1.41028	-1077	793	-20.2477	14.9085	53.5	294.75	5.54132	262.323	4.93169	49.5743	0.932	3	1077	0.0564	20.2477	0.88346	0.90058	0.03532	0.00668	0.81915	0.05575	0.01054	0.63483	0.19735
wm-lh-medialorbitofrontal	3062.82	497.305	3063.54	531.777	0.71429	0.02332	221.913	7.24455	41.9377	1.36909	-622	579	-20.3057	18.9019	-1.5	145.786	4.7593	164.941	5.38463	31.1709	1.0176	12	622	0.39175	20.3057	0.91027	0.91997	0.028	0.00529	0.8518	0.04713	0.00891	0.98654	0.00589
wm-lh-middletemporal	4687.46	929.337	4748	1071.34	60.5357	1.28315	335.739	7.11654	63.4487	1.3449	-724	770	-15.3464	16.3214	62	248.25	5.26206	229.37	4.86187	43.3468	0.91881	11	770	0.23316	16.3214	0.94413	0.88771	0.05334	0.01008	0.79809	0.07992	0.0151	0.3485	0.45779
wm-lh-paracentral	4134.29	732.558	4172.79	709.808	38.5	0.92692	203.099	4.88977	38.382	0.92408	-223	806	-5.36892	19.4051	9.5	136.714	3.29152	152.981	3.68314	28.9106	0.69605	2	806	0.04815	19.4051	0.96035	0.93616	0.02525	0.00477	0.87999	0.04188	0.00792	0.32473	0.48848
wm-lh-parahippocampal	1631.68	338.461	1620.75	348.924	-10.9286	-0.67203	175.777	10.809	33.2187	2.0427	-446	395	-27.4257	24.2895	-26.5	131.5	8.08627	114.406	7.03508	21.6206	1.32951	2	446	0.12299	27.4257	0.87315	0.87996	0.04577	0.00865	0.78565	0.07097	0.01341	0.7447	0.12802
wm-lh-parsopercularis	3795.18	663.253	3739.61	628.488	-55.5714	-1.47506	226.757	6.01894	42.8531	1.13747	-688	205	-18.262	5.44143	18.5	151	4.00808	176	4.67166	33.2608	0.88286	3	688	0.07963	18.262	0.93696	0.92017	0.02952	0.00558	0.85214	0.04856	0.00918	0.20568	0.68681
wm-lh-parsorbitalis	929.214	255.803	953.821	283.541	24.6071	2.61356	104.782	11.1291	19.802	2.10319	-170	352	-18.0559	37.3864	3	69.1071	7.33997	81.5754	8.66424	15.4163	1.63739	1	352	0.10621	37.3864	0.9233	0.88637	0.04456	0.00842	0.79593	0.0696	0.01315	0.22468	0.64844
wm-lh-parstriangularis	2921	510.945	2994.29	590.559	73.2857	2.47784	286.66	9.69217	54.1736	1.83165	-358	745	-12.1042	25.189	3	210.786	7.12681	204.126	6.90163	38.5761	1.30429	1	745	0.03381	25.189	0.86153	0.90633	0.03418	0.00646	0.82871	0.05568	0.01052	0.18734	0.72736
wm-lh-pericalcarine	2952.21	539.013	2991.96	578.341	39.75	1.33744	249.047	8.37954	47.0655	1.58358	-394	845	-13.2567	28.4312	16.5	170.821	5.74752	182.763	6.14932	34.539	1.16211	6	845	0.20188	28.4312	0.90173	0.88498	0.05576	0.01054	0.7937	0.08507	0.01608	0.40577	0.39172
wm-lh-postcentral	6975.04	1032.02	6959.54	1083.5	-15.5	-0.22247	315.216	4.52424	59.5703	0.855	-1020	797	-14.6398	11.4392	-10	194.214	2.78752	245.956	3.53016	46.4813	0.66714	7	1020	0.10047	14.6398	0.95707	0.92133	0.03177	0.006	0.85413	0.05147	0.00973	0.79669	0.09871
wm-lh-posteriorcingulate	4523.68	728.907	4599.75	750.714	76.0714	1.66761	179.67	3.93864	33.9544	0.74433	-269	540	-5.89691	11.8377	75.5	148.429	3.25379	124.239	2.72352	23.479	0.5147	2	540	0.04384	11.8377	0.96635	0.93096	0.01472	0.00278	0.87084	0.02551	0.00482	0.03349	1.47505
wm-lh-precentral	13223	1864.29	13195.8	1896.1	-27.1786	-0.20575	308.287	2.33385	58.2607	0.44106	-638	727	-4.8299	5.50367	-29.5	224.75	1.70144	208.383	1.57754	39.3806	0.29813	6	727	0.04542	5.50367	0.98693	0.94926	0.0152	0.00287	0.90342	0.02708	0.00512	0.6446	0.19071
wm-lh-precuneus	9292.68	1381.93	9385	1345.02	92.3214	0.98857	262.385	2.80961	49.5861	0.53097	-520	585	-5.56814	6.26416	128	224.679	2.40585	159.169	1.70438	30.0801	0.3221	0	585	0	6.26416	0.97987	0.94813	0.01251	0.00236	0.90137	0.02262	0.00427	0.07354	1.13345
wm-lh-rostralanteriorcingulate	2193.61	437.72	2162.11	423.864	-31.5	-1.44638	102.763	4.71854	19.4204	0.89172	-191	229	-8.77009	10.5149	-55	93.4286	4.28993	50.3693	2.31279	9.51891	0.43708	28	229	1.28567	10.5149	0.96992	0.91132	0.02927	0.00553	0.83708	0.04874	0.00921	0.11642	0.93396
wm-lh-rostralmiddlefrontal	11850.2	2480.2	11932.2	2750.17	81.9286	0.68898	780.732	6.56562	147.545	1.24079	-1934	3412	-16.2641	28.6934	52.5	350	2.94335	699.619	5.88349	132.216	1.11188	2	3412	0.01682	28.6934	0.95663	0.9445	0.03315	0.00626	0.89484	0.05467	0.01033	0.58327	0.23413
wm-lh-superiorfrontal	18197.2	2962.97	18107.9	2680.81	-89.3571	-0.49226	681.323	3.75331	128.758	0.70931	-2745	1453	-15.1218	8.00438	-48.5	410.071	2.25903	545.98	3.00773	103.181	0.56841	20	2745	0.11018	15.1218	0.97146	0.95441	0.01737	0.00328	0.91279	0.03085	0.00583	0.49361	0.30661
wm-lh-superiorparietal	11161.2	1721.6	11230.5	1565.13	69.25	0.61853	427.872	3.8217	80.8602	0.72223	-461	1724	-4.11759	15.3985	-0.5	265.107	2.3679	339.357	3.03109	64.1324	0.57282	26	1724	0.23223	15.3985	0.9665	0.94309	0.02624	0.00496	0.89231	0.04433	0.00838	0.39931	0.3987
wm-lh-superiortemporal	7232.54	1473.93	7306.39	1516.74	73.8571	1.01599	436.393	6.0031	82.4705	1.13448	-573	1987	-7.88229	27.3335	79.5	252.714	3.47638	360.369	4.9573	68.1034	0.93684	2	1987	0.02751	27.3335	0.95772	0.92299	0.02482	0.00469	0.85699	0.04157	0.00786	0.3784	0.42204
wm-lh-supramarginal	8232.75	1218.57	8124.75	1291.39	-108	-1.3205	282.81	3.45787	53.4461	0.65348	-806	357	-9.85481	4.36497	-96	225.857	2.76151	197.931	2.42007	37.4055	0.45735	6	806	0.07336	9.85481	0.97188	0.936	0.0301	0.00569	0.8797	0.05027	0.0095	0.05333	1.27305
wm-lh-temporalpole	456.464	107.024	495.75	144.057	39.2857	8.25144	85.2077	17.8968	16.1028	3.38217	-137	268	-28.775	56.2899	18.5	64.4286	13.5324	67.4989	14.1773	12.7561	2.67925	3	268	0.63011	56.2899	0.73988	0.80107	0.06713	0.01269	0.66815	0.09329	0.01763	0.02155	1.66658
wm-lh-transversetemporal	707.607	170.808	724.143	179.038	16.5357	2.30986	83.1623	11.6169	15.7162	2.19538	-153	192	-21.3725	26.8203	16.5	64.75	9.04488	53.4011	7.45955	10.0919	1.40972	2	192	0.27938	26.8203	0.88664	0.8559	0.03511	0.00664	0.74809	0.05097	0.00963	0.30206	0.51991
wm-rh-bankssts	2868.96	499.937	2853.11	474.494	-15.8571	-0.55424	150.521	5.26107	28.4458	0.99425	-599	255	-20.9365	8.91286	-10	94.9286	3.31798	116.5	4.07194	22.0163	0.76952	2	599	0.0699	20.9365	0.95346	0.92824	0.02426	0.00458	0.86608	0.04093	0.00773	0.58181	0.23522
wm-rh-caudalanteriorcingulate	2704.14	533.107	2714.43	587.702	10.2857	0.37965	186.769	6.89367	35.2961	1.30278	-363	365	-13.3984	13.4722	-20.5	145.786	5.38096	113.806	4.20059	21.5073	0.79384	12	365	0.44292	13.4722	0.94636	0.91403	0.02664	0.00504	0.84166	0.04465	0.00844	0.77296	0.11184
wm-rh-caudalmiddlefrontal	6025.07	1257.86	5998.25	1147.76	-26.8214	-0.44616	320.179	5.32596	60.5081	1.00651	-1068	491	-17.7655	8.16746	-46.5	230.607	3.836	219.343	3.64862	41.4518	0.68952	21	1068	0.34932	17.7655	0.96564	0.93227	0.02087	0.00394	0.87312	0.0362	0.00684	0.6611	0.17973
wm-rh-cuneus	2209.54	353.046	2249.79	379.623	40.25	1.80521	127.777	5.73076	24.1475	1.08301	-277	392	-12.4234	17.5812	27	94.3929	4.23351	93.6318	4.19937	17.6947	0.79361	3	392	0.13455	17.5812	0.93552	0.89868	0.03977	0.00752	0.816	0.05839	0.01104	0.10711	0.97018
wm-rh-entorhinal	601.643	181.631	625.286	177.284	23.6429	3.85399	122.174	19.9155	23.0888	3.76368	-202	383	-32.9278	62.4323	32.5	89.9286	14.6591	84.3779	13.7543	15.9459	2.59932	1	383	0.16301	62.4323	0.76794	0.78989	0.10393	0.01964	0.65275	0.12712	0.02402	0.31492	0.50179
wm-rh-frontalpole	208.893	47.595	205.75	42.6551	-3.14286	-1.51593	35.0584	16.9102	6.62541	3.19572	-107	58	-51.6107	27.9759	0	22.5714	10.8872	26.6645	12.8614	5.03911	2.43058	1	107	0.48234	51.6107	0.70621	0.80844	0.0889	0.0168	0.67847	0.11441	0.02162	0.63905	0.19446
wm-rh-fusiform	6124.36	1061.32	6107.29	1028.61	-17.0714	-0.27914	293.484	4.79877	55.4633	0.90688	-737	455	-12.0507	7.43972	40	230.929	3.77592	176.443	2.88502	33.3445	0.54522	5	737	0.08176	12.0507	0.96182	0.90582	0.03204	0.00606	0.82785	0.05173	0.00978	0.7606	0.11884
wm-rh-inferiorparietal	10931.4	1622.54	10736.5	1521.77	-194.964	-1.79957	401.039	3.70169	75.7892	0.69955	-1124	470	-10.3748	4.33822	-215.5	350.607	3.23619	269.764	2.48999	50.9807	0.47056	6	1124	0.05538	10.3748	0.9611	0.94509	0.01295	0.00245	0.89591	0.02306	0.00436	0.01592	1.79816
wm-rh-inferiortemporal	5169.93	1253.01	5225.57	1222.48	55.6429	1.07052	311.223	5.98764	58.8155	1.13156	-577	1021	-11.101	19.6431	32.5	218.857	4.21061	224.495	4.31907	42.4255	0.81623	3	1021	0.05772	19.6431	0.96851	0.89932	0.03063	0.00579	0.81707	0.04744	0.00897	0.35251	0.45283
wm-rh-insula	8657.54	1067.8	8613	1076.38	-44.5357	-0.51574	340.745	3.94597	64.3948	0.74572	-853	559	-9.8781	6.47345	-13	256.107	2.96583	223.929	2.59319	42.3185	0.49007	3	853	0.03474	9.8781	0.95041	0.92485	0.01883	0.00356	0.8602	0.03237	0.00612	0.49509	0.30532
wm-rh-isthmuscingulate	2954.04	392.087	3013.75	440.952	59.7143	2.00122	221.224	7.41393	41.8073	1.4011	-412	695	-13.8075	23.2917	60.5	168.429	5.64459	152.378	5.10667	28.7966	0.96507	3	695	0.10054	23.2917	0.8546	0.89914	0.03192	0.00603	0.81676	0.05078	0.0096	0.16467	0.7834
wm-rh-lateraloccipital	8338.68	1220.13	8324.96	1399.23	-13.7143	-0.1646	434.003	5.20898	82.0189	0.98441	-1409	1176	-16.9111	14.1146	13.5	275.071	3.30146	331.794	3.98225	62.7031	0.75257	3	1409	0.03601	16.9111	0.9472	0.92554	0.02595	0.0049	0.86139	0.04318	0.00816	0.86845	0.06125
wm-rh-lateralorbitofrontal	6548.18	943.411	6565.89	953.56	17.7143	0.27016	165.058	2.51726	31.193	0.47572	-362	350	-5.52079	5.33778	58	129.357	1.9728	101.077	1.5415	19.1017	0.29132	1	362	0.01525	5.52079	0.98522	0.94291	0.01465	0.00277	0.89199	0.02611	0.00493	0.5748	0.24048
wm-rh-lingual	5277.86	948.672	5340.57	858.234	62.7143	1.18123	330.757	6.22986	62.5071	1.17733	-445	911	-8.38165	17.1589	38	264.5	4.9819	202.305	3.81045	38.232	0.72011	27	911	0.50855	17.1589	0.93314	0.89922	0.03834	0.00725	0.81689	0.06111	0.01155	0.32462	0.48863
wm-rh-medialorbitofrontal	3126.14	583.187	3207.04	551.24	80.8929	2.55457	166.142	5.24671	31.3978	0.99153	-362	448	-11.4319	14.1477	63	134.536	4.2486	124.975	3.94669	23.6181	0.74585	2	448	0.06316	14.1477	0.94873	0.92886	0.02368	0.00447	0.86717	0.04043	0.00764	0.01577	1.8021
wm-rh-middletemporal	5355.82	1051.82	5433.5	911.987	77.6786	1.43992	246.864	4.57609	46.653	0.8648	-681	497	-12.6236	9.21281	51	189.25	3.5081	173.371	3.21375	32.764	0.60734	3	681	0.05561	12.6236	0.9666	0.90793	0.0255	0.00482	0.83138	0.04184	0.00791	0.10747	0.96871
wm-rh-paracentral	5169.46	902.521	5152.32	877.596	-17.1429	-0.33217	187.259	3.62843	35.3887	0.68571	-478	323	-9.26196	6.25861	-28.5	147.214	2.8525	113.561	2.20041	21.461	0.41584	2	478	0.03875	9.26196	0.97847	0.94211	0.0159	0.00301	0.89055	0.02825	0.00534	0.632	0.19929
wm-rh-parahippocampal	1683.71	343.672	1679.21	373.69	-4.5	-0.26762	162.824	9.68344	30.7708	1.83	-318	658	-18.9121	39.1326	-5.5	91.7857	5.45868	133.401	7.93363	25.2105	1.49932	1	658	0.05947	39.1326	0.90056	0.89983	0.07696	0.01454	0.8179	0.10557	0.01995	0.88482	0.05315
wm-rh-parsopercularis	3430.11	772.859	3432.39	753.537	2.28571	0.06661	144.908	4.22317	27.385	0.7981	-299	282	-8.71403	8.21858	19.5	116.071	3.38277	83.8574	2.44393	15.8476	0.46186	6	299	0.17486	8.71403	0.98261	0.9171	0.02093	0.00395	0.84689	0.03548	0.0067	0.9341	0.02961
wm-rh-parsorbitalis	1133.21	239.588	1141.18	252.381	7.96429	0.70034	80.4457	7.07404	15.2028	1.33687	-173	206	-15.2128	18.1147	-4	55.6786	4.89613	57.64	5.06861	10.8929	0.95788	3	206	0.26381	18.1147	0.94791	0.89616	0.03738	0.00706	0.81185	0.05869	0.01109	0.60464	0.2185
wm-rh-parstriangularis	3133.96	798.252	3156.25	770.412	22.2857	0.70858	155.262	4.93662	29.3418	0.93293	-248	324	-7.88526	10.3017	10	123.786	3.93582	93.4394	2.97094	17.6584	0.56146	1	324	0.0318	10.3017	0.98071	0.92566	0.02175	0.00411	0.8616	0.03738	0.00706	0.45412	0.34283
wm-rh-pericalcarine	3303.18	697.11	3367.57	724.852	64.3929	1.9306	305.711	9.1657	57.7739	1.73215	-409	1191	-12.2625	35.7081	-2	175.321	5.25642	256.677	7.69559	48.5073	1.45433	2	1191	0.05996	35.7081	0.90683	0.88746	0.06485	0.01225	0.79768	0.09148	0.01729	0.27486	0.56089
wm-rh-postcentral	6846.04	1116.83	6788.39	1093.13	-57.6429	-0.84555	232.415	3.40923	43.9223	0.64428	-422	458	-6.19021	6.71829	-62	198.357	2.90965	129.072	1.89332	24.3923	0.3578	35	458	0.51341	6.71829	0.97732	0.92225	0.01287	0.00243	0.85571	0.02213	0.00418	0.20044	0.69802
wm-rh-posteriorcingulate	4201.32	710.597	4232.71	665.796	31.3929	0.74443	193.484	4.58817	36.565	0.86708	-586	368	-13.8961	8.72655	58	153.893	3.64933	117.889	2.79556	22.279	0.52831	23	586	0.54541	13.8961	0.96088	0.92309	0.0178	0.00336	0.85716	0.0305	0.00576	0.39815	0.39996
wm-rh-precentral	13319.7	1816.85	13333.2	1943.61	13.5357	0.10157	387.308	2.9063	73.1942	0.54924	-484	1506	-3.63187	11.3008	-23	249.964	1.8757	292.234	2.19288	55.2271	0.41442	10	1506	0.07504	11.3008	0.97953	0.95051	0.00913	0.00173	0.90569	0.01649	0.00312	0.85467	0.0682
wm-rh-precuneus	10009.2	1540.68	9915.43	1438.76	-93.7857	-0.9414	307.989	3.09154	58.2045	0.58425	-1179	376	-11.8346	3.77422	-50	219	2.19828	232.898	2.33779	44.0136	0.4418	5	1179	0.05019	11.8346	0.97745	0.94578	0.0218	0.00412	0.89715	0.03709	0.00701	0.11874	0.9254
wm-rh-rostralanteriorcingulate	1598.39	249.353	1587.61	253.868	-10.7857	-0.67707	113.193	7.10562	21.3914	1.34284	-174	218	-10.9228	13.6849	-31.5	96.2857	6.0443	57.6097	3.61643	10.8872	0.68344	5	218	0.31387	13.6849	0.90138	0.89095	0.05063	0.00957	0.80335	0.07801	0.01474	0.6182	0.20887
wm-rh-rostralmiddlefrontal	12286.6	2750.53	12339.5	2835.49	52.9286	0.42986	352.684	2.86431	66.6511	0.5413	-686	743	-5.57132	6.03424	100.5	280.143	2.27517	214.254	1.74005	40.4902	0.32884	7	743	0.05685	6.03424	0.99213	0.95323	0.01622	0.00306	0.91063	0.02863	0.00541	0.43405	0.36246
wm-rh-superiorfrontal	18078.6	2764.45	18149.2	2690.26	70.6429	0.38999	313.817	1.73246	59.3058	0.3274	-618	711	-3.41174	3.92516	49	244.571	1.35018	204.024	1.12634	38.5569	0.21286	9	711	0.04969	3.92516	0.99328	0.95793	0.00893	0.00169	0.91926	0.01643	0.0031	0.24396	0.61269
wm-rh-superiorparietal	11071.4	1877.88	11109	1909.17	37.5714	0.33878	265.814	2.39684	50.2342	0.45296	-784	608	-7.0693	5.48231	55.5	181.929	1.64044	194.415	1.75304	36.7411	0.33129	3	784	0.02705	7.0693	0.9903	0.94622	0.01067	0.00202	0.89792	0.01909	0.00361	0.46097	0.33633
wm-rh-superiortemporal	6311.54	1048.09	6269.64	1011.41	-41.8929	-0.66596	139.223	2.2132	26.3107	0.41825	-312	333	-4.95979	5.29362	-42.5	110.536	1.75716	92.371	1.4684	17.4565	0.2775	0	333	0	5.29362	0.99036	0.92912	0.01579	0.00298	0.86762	0.02735	0.00517	0.12297	0.91019
wm-rh-supramarginal	8444.93	1371.83	8459.25	1322.76	14.3214	0.16944	256.594	3.03586	48.4917	0.57372	-504	477	-5.96302	5.64358	-35.5	200.179	2.36839	156.517	1.85181	29.5789	0.34996	0	504	0	5.96302	0.98246	0.94467	0.01286	0.00243	0.89513	0.02288	0.00432	0.77	0.11351
wm-rh-temporalpole	546.536	124.636	541.393	163.794	-5.14286	-0.94544	131.074	24.0961	24.7707	4.55374	-248	364	-45.5912	66.9162	-30.5	94.0714	17.2937	89.6144	16.4743	16.9355	3.11335	6	364	1.10301	66.9162	0.60557	0.79397	0.11487	0.02171	0.65834	0.14357	0.02713	0.83709	0.07723
wm-rh-transversetemporal	490	123.191	507.25	148.548	17.25	3.45951	69.5348	13.9453	13.1408	2.63541	-167	225	-33.4921	45.1241	12.5	47.3214	9.49038	53.117	10.6527	10.0382	2.01317	2	225	0.4011	45.1241	0.86704	0.83451	0.05261	0.00994	0.71602	0.07382	0.01395	0.20033	0.69825
Brain Mask Volume	1.58629e+06	153372	1.58611e+06	153242	-177.893	-0.01122	1167.86	0.07363	220.705	0.01391	-5767	1605	-0.36357	0.10119	0	357.107	0.02251	1124.48	0.07089	212.508	0.0134	0	5767	0	0.36357	0.99997	0.99861	0.00248	0.00047	0.99722	0.00494	0.00093	0.42727	0.3693
Brain Segmentation Volume	1.17365e+06	141107	1.17523e+06	144511	1587.39	0.13516	13218.7	1.12553	2498.09	0.21271	-8716	66557	-0.74214	5.66713	-448	4940.04	0.42063	12330.4	1.0499	2330.23	0.19841	72	66557	0.00613	5.66713	0.99581	0.98915	0.0073	0.00138	0.97853	0.01411	0.00267	0.53049	0.27532
Brain Segmentation Volume Without Ventricles	1.1533e+06	141669	1.15491e+06	145163	1613.14	0.13977	13229.2	1.14627	2500.08	0.21663	-8533	66664	-0.73936	5.77627	-380.5	4920.57	0.42636	12353.2	1.07037	2334.53	0.20228	29	66664	0.00251	5.77627	0.99583	0.98865	0.00752	0.00142	0.97755	0.01452	0.00274	0.52422	0.28049
Ventricles	17536.1	10685.1	17540.5	10661.3	4.46429	0.02545	174.252	0.99355	32.9305	0.18776	-574	368	-3.27284	2.09826	-5	114.536	0.65306	129.538	0.7386	24.4803	0.13958	3	574	0.01711	3.27284	0.99987	0.97527	0.02292	0.00433	0.95174	0.04106	0.00776	0.89317	0.04907
Left Medial-inferior Temporal Gyrus	28977.9	4823.06	29186	4813.82	208.107	0.71559	1265.77	4.35241	239.207	0.82253	-3576	3448	-12.2963	11.8561	290.5	886.393	3.04791	912.296	3.13698	172.408	0.59283	37	3576	0.12723	12.2963	0.96579	0.9359	0.02531	0.00478	0.87952	0.04321	0.00817	0.39198	0.40674
Right Medial-inferior Temporal Gyrus	30492.5	6413.48	30911.6	6021.1	419.107	1.36508	1258.22	4.09815	237.78	0.77448	-2188	4303	-7.12657	14.0154	288	948.25	3.08856	912.569	2.97234	172.459	0.56172	22	4303	0.07166	14.0154	0.97802	0.93996	0.01504	0.00284	0.88673	0.02639	0.00499	0.08929	1.0492
Left Superior Temporal Gyrus	19386	3274.81	19545	3413.53	158.929	0.81646	653.741	3.35846	123.545	0.63469	-1116	2617	-5.73322	13.4443	200.5	445.571	2.28903	497.678	2.55672	94.0524	0.48317	4	2617	0.02055	13.4443	0.98046	0.93284	0.02369	0.00448	0.87414	0.04024	0.00761	0.20923	0.67938
Right Superior Temporal Gyrus	17801.2	2573.66	17770.7	2485.94	-30.4643	-0.17128	342.951	1.92821	64.8117	0.3644	-1151	657	-6.4714	3.69393	8	239.964	1.34918	242.616	1.36409	45.8501	0.25779	1	1151	0.00562	6.4714	0.99107	0.94523	0.01119	0.00212	0.89615	0.02	0.00378	0.6421	0.1924
Left Temporal Lobe	80179.5	11339.3	80556.7	11328.5	377.179	0.46931	1627.27	2.02477	307.525	0.38264	-3957	4670	-4.92359	5.81076	376.5	1194.39	1.48615	1147.22	1.42746	216.805	0.26976	11	4670	0.01369	5.81076	0.98951	0.95462	0.01596	0.00302	0.91318	0.0287	0.00542	0.2306	0.63714
Right Temporal Lobe	78947.4	12405.2	79380.2	11775.6	432.786	0.5467	1377.32	1.73983	260.289	0.3288	-2440	3663	-3.08222	4.62712	367	1095.93	1.38438	919.622	1.16167	173.792	0.21953	103	3663	0.13011	4.62712	0.99311	0.95747	0.00999	0.00189	0.91841	0.01829	0.00346	0.10794	0.96683
v4.5.0
Struct	Mean1	sd1	Mean2	sd2	Mean diff	Mean diff %	sd Diff	sd Diff %	se Diff	se Diff %	min Diff	max Diff	min Diff %	max Diff %	median	Mean AbsDiff	Mean AbsDiff %	sd AbsDiff	sd AbsDiff %	se AbsDiff	se AbsDiff %	min AbsDiff	max AbsDiff	min AbsDiff %	max AbsDiff %	ICC(1,1)	SI	sd SI	se SI	OR	sd OR	se OR	p	-log10(p)
3rd-Ventricle	965.69	451.584	957.621	454.161	-8.06897	-0.83907	48.854	5.0802	9.07195	0.94337	-167	96	-17.3659	9.98279	-3	31.1724	3.24154	38.0489	3.95661	7.0655	0.73472	0	167	0	17.3659	0.99422	0.96303	0.02371	0.0044	0.9287	0.04316	0.00802	0.38134	0.41868
4th-Ventricle	1827.28	774.414	1817.9	742.86	-9.37931	-0.51462	64.3708	3.53184	11.9534	0.65585	-214	107	-11.7416	5.87078	0	43.931	2.41037	47.2848	2.59438	8.78057	0.48176	0	214	0	11.7416	0.99645	0.96229	0.01763	0.00327	0.92733	0.03275	0.00608	0.43924	0.3573
5th-Ventricle	6.89655	7.82096	6.96552	9.29087	0.06897	0.99502	4.50342	64.9747	0.83626	12.0655	-9	13	-129.851	187.562	0	2.89655	41.791	3.4053	49.1312	0.63235	9.12343	0	13	0	187.562	0.86689	0.74627	0.37642	0.0699	0.59524	0.3395	0.06304	0.93486	0.02925
Brain-Stem	18115.1	2276.67	18076.9	2289.01	-38.2414	-0.21132	181.958	1.00551	33.7887	0.18672	-753	282	-4.16114	1.55835	-31	114.448	0.63245	145.11	0.80189	26.9463	0.14891	2	753	0.01105	4.16114	0.99679	0.97879	0.0108	0.00201	0.95846	0.02063	0.00383	0.26733	0.57296
CC_Anterior	979.172	180.828	968.793	171.751	-10.3793	-1.06566	36.8844	3.78697	6.84926	0.70322	-149	34	-15.298	3.49082	-2	17.2069	1.76665	34.1377	3.50496	6.33922	0.65086	1	149	0.10267	15.298	0.97716	0.96139	0.07403	0.01375	0.92565	0.11353	0.02108	0.14088	0.85114
CC_Central	488.414	123.329	487.552	125.735	-0.86207	-0.17666	37.545	7.69391	6.97192	1.42872	-123	150	-25.2058	30.7388	-1	14.1724	2.90429	34.6751	7.1058	6.439	1.31951	0	150	0	30.7388	0.95607	0.95707	0.0695	0.01291	0.91768	0.10958	0.02035	0.90248	0.04456
CC_Mid_Anterior	508.552	127.603	515.517	134.742	6.96552	1.36036	40.492	7.90807	7.51918	1.46849	-20	214	-3.90599	41.7941	0	12.069	2.35706	39.23	7.6616	7.28483	1.42272	0	214	0	41.7941	0.95262	0.95663	0.08417	0.01563	0.91687	0.12593	0.02338	0.36217	0.44108
CC_Mid_Posterior	467.414	99.1948	470.966	104.3	3.55172	0.75699	19.1042	4.07174	3.54756	0.7561	-18	97	-3.8364	20.6739	0	7.41379	1.58013	17.9195	3.81924	3.32757	0.70922	0	97	0	20.6739	0.98238	0.96447	0.05923	0.011	0.93137	0.09687	0.01799	0.32532	0.48769
CC_Posterior	918.138	168.542	918.897	166.674	0.75862	0.08259	12.5461	1.3659	2.32975	0.25364	-22	43	-2.39516	4.68146	0	8.06897	0.87848	9.51664	1.03609	1.7672	0.1924	0	43	0	4.68146	0.99728	0.97695	0.04996	0.00928	0.95494	0.08324	0.01546	0.74713	0.1266
CSF	1199.76	281.837	1218.21	313.219	18.4483	1.52593	75.2522	6.22443	13.974	1.15585	-84	356	-6.94799	29.4462	6	42.3793	3.50537	64.4612	5.33185	11.9701	0.9901	0	356	0	29.4462	0.9673	0.94294	0.0333	0.00618	0.89204	0.05824	0.01081	0.19746	0.70451
Left-Accumbens-area	581.655	133.45	593.552	132.232	11.8965	2.02459	49.8873	8.48995	9.26383	1.57654	-154	123	-26.2081	20.9325	11	35.3448	6.01508	36.6258	6.23308	6.80124	1.15745	2	154	0.34037	26.2081	0.92796	0.90614	0.04943	0.00918	0.82838	0.08097	0.01504	0.2096	0.67861
Left-Amygdala	1770.59	343.286	1776.93	351.334	6.34483	0.35771	61.4139	3.46236	11.4043	0.64294	-94	169	-5.29948	9.52779	1	46.8965	2.64391	39.1858	2.20919	7.27661	0.41024	1	169	0.05638	9.52779	0.98474	0.93285	0.03665	0.00681	0.87416	0.06186	0.01149	0.58239	0.23479
Left-Caudate	4001.79	562.43	4018.03	576.391	16.2414	0.40503	55.2964	1.37899	10.2683	0.25607	-60	154	-1.49629	3.84048	14	41.5517	1.03622	39.277	0.9795	7.29356	0.18189	1	154	0.02494	3.84048	0.99504	0.97085	0.01537	0.00285	0.94336	0.02876	0.00534	0.12495	0.90327
Left-Cerebellum-Cortex	47643.1	6636.81	47570.2	6646.93	-72.8966	-0.15312	567.059	1.19114	105.3	0.22119	-1815	1210	-3.81249	2.54166	-26	372.345	0.78213	428.331	0.89973	79.5391	0.16708	16	1815	0.03361	3.81249	0.99642	0.96329	0.01889	0.00351	0.92917	0.03493	0.00649	0.49447	0.30586
Left-Cerebellum-White-Matter	16074.7	2363.03	15994	2688.11	-80.6552	-0.50302	653.357	4.07474	121.325	0.75666	-1517	2647	-9.46095	16.5083	-42	331.414	2.0669	565.558	3.52717	105.021	0.65498	5	2647	0.03118	16.5083	0.96731	0.96721	0.03058	0.00568	0.9365	0.05316	0.00987	0.51163	0.29105
Left-Cerebral-Cortex	261580	34027.7	261775	34879	194.517	0.07433	4086.83	1.56178	758.906	0.29002	-8751	18130	-3.3442	6.92838	8	1902.72	0.72713	3604.4	1.37742	669.321	0.25578	5	18130	0.00191	6.92838	0.99319	0.9694	0.02292	0.00426	0.94062	0.04154	0.00771	0.79958	0.09714
Left-Cerebral-White-Matter	207720	30152.4	207992	30733.3	271.138	0.13045	3822.67	1.83909	709.851	0.34151	-4036	17922	-1.94173	8.62232	16	1622.59	0.78063	3458.63	1.66395	642.251	0.30899	14	17922	0.00674	8.62232	0.99235	0.98404	0.01375	0.00255	0.96858	0.02593	0.00482	0.70537	0.15158
Left-Hippocampus	4099.31	537.474	4091.83	507.156	-7.48276	-0.1827	75.3784	1.84049	13.9974	0.34177	-129	142	-3.14975	3.46716	-15	61.7586	1.50794	42.303	1.0329	7.85548	0.1918	2	142	0.04883	3.46716	0.98985	0.94903	0.01959	0.00364	0.90301	0.0354	0.00657	0.59716	0.22391
Left-Inf-Lat-Vent	394.034	329.441	393.724	327.034	-0.31034	-0.07879	37.4625	9.51115	6.9566	1.76618	-113	79	-28.689	20.0569	0	24.0345	6.10199	28.3769	7.20447	5.26946	1.33784	0	113	0	28.689	0.99371	0.90462	0.05918	0.01099	0.82585	0.09268	0.01721	0.96473	0.01559
Left-Lateral-Ventricle	8809.62	6566.76	8800.59	6575.61	-9.03448	-0.10261	90.8997	1.03235	16.8796	0.1917	-269	151	-3.05505	1.71491	1	61.2414	0.69552	66.8044	0.7587	12.4053	0.14089	1	269	0.01136	3.05505	0.99991	0.97978	0.01702	0.00316	0.96036	0.03171	0.00589	0.59672	0.22423
Left-Pallidum	1755.07	253.379	1770.28	246.74	15.2069	0.86272	59.0952	3.35259	10.9737	0.62256	-47	261	-2.66641	14.8071	11	37.7586	2.14212	47.4881	2.6941	8.81832	0.50028	5	261	0.28366	14.8071	0.97121	0.94829	0.0274	0.00509	0.90166	0.04853	0.00901	0.17676	0.75262
Left-Putamen	6223.1	748.438	6211.66	743.178	-11.4483	-0.18413	99.028	1.59276	18.389	0.29577	-179	301	-2.87903	4.84127	-7	67.2414	1.08151	72.5217	1.16644	13.467	0.2166	1	301	0.01608	4.84127	0.99137	0.96802	0.01522	0.00283	0.93802	0.02847	0.00529	0.53861	0.26872
Left-Thalamus-Proper	7203.14	925.807	7226.03	877.23	22.8966	0.31736	115.767	1.60462	21.4974	0.29797	-230	322	-3.18799	4.46318	11	81.0345	1.1232	84.5211	1.17153	15.6952	0.21755	2	322	0.02772	4.46318	0.99172	0.97328	0.01402	0.0026	0.94795	0.02643	0.00491	0.29594	0.5288
Left-VentralDC	3900.21	422.654	3881.9	439.711	-18.3103	-0.47058	99.4309	2.55537	18.4639	0.47452	-308	122	-7.9156	3.1354	-16	77.4138	1.98953	63.4573	1.63085	11.7837	0.30284	5	308	0.1285	7.9156	0.97344	0.94446	0.03246	0.00603	0.89476	0.05631	0.01046	0.32984	0.48169
Left-choroid-plexus	1623	336.9	1632.72	348.304	9.72414	0.59736	95.8346	5.88715	17.7961	1.09322	-365	185	-22.422	11.3646	12	61.3793	3.77055	73.3501	4.50592	13.6208	0.83673	5	365	0.30715	22.422	0.96182	0.88756	0.0549	0.01019	0.79785	0.08523	0.01583	0.5891	0.22981
Left-vessel	87.7241	53.9814	85.1724	51.8184	-2.55172	-2.95174	10.8285	12.526	2.0108	2.32601	-23	29	-26.6055	33.5461	0	7.93103	9.17431	7.67152	8.87412	1.42457	1.64788	0	29	0	33.5461	0.97862	0.90028	0.07711	0.01432	0.81864	0.12016	0.02231	0.21489	0.66779
Optic-Chiasm	184.931	93.9202	190.724	100.776	5.7931	3.08427	71.2167	37.916	13.2246	7.04082	-185	232	-98.4946	123.518	5	43.4483	23.132	56.1373	29.8877	10.4244	5.55	1	232	0.5324	123.518	0.73921	0.82192	0.19	0.03528	0.69768	0.22622	0.04201	0.66471	0.17737
Right-Accumbens-area	687.724	118.238	694.034	111.052	6.31034	0.91338	41.4144	5.99444	7.69046	1.11314	-93	109	-13.4611	15.777	-1	29.8966	4.32732	28.8213	4.17168	5.35198	0.77466	1	109	0.14474	15.777	0.93553	0.91138	0.04404	0.00818	0.83719	0.07188	0.01335	0.41884	0.37795
Right-Amygdala	1804.07	353.868	1818.83	338.827	14.7586	0.81474	80.5165	4.44487	14.9515	0.82539	-182	231	-10.0472	12.7522	-1	50.6897	2.79829	63.6183	3.51202	11.8136	0.65216	0	231	0	12.7522	0.97301	0.94382	0.03086	0.00573	0.89363	0.05478	0.01017	0.33205	0.4788
Right-Caudate	4051.28	566.199	4089.24	569.351	37.9655	0.93275	83.0931	2.04147	15.43	0.37909	-52	266	-1.27756	6.53521	13	57.8276	1.42073	70.2415	1.72572	13.0435	0.32046	0	266	0	6.53521	0.98744	0.9683	0.01928	0.00358	0.93855	0.03569	0.00663	0.02031	1.69239
Right-Cerebellum-Cortex	47696.3	7149.54	47637.5	7071.89	-58.7931	-0.12334	678.151	1.42269	125.929	0.26419	-1934	1136	-4.05732	2.38321	65	475.414	0.99737	478.934	1.00475	88.9359	0.18658	3	1934	0.00629	4.05732	0.99557	0.96169	0.02047	0.0038	0.92621	0.03786	0.00703	0.6442	0.19098
Right-Cerebellum-White-Matter	16163.7	2632.67	15834.4	2569.53	-329.345	-2.05853	848.886	5.30585	157.634	0.98527	-3467	1102	-21.67	6.88791	-30	476.931	2.981	772.892	4.83086	143.522	0.89707	3	3467	0.01875	21.67	0.94076	0.96225	0.02415	0.00449	0.92725	0.04398	0.00817	0.04589	1.3383
Right-Cerebral-Cortex	260556	34562.3	261497	35325.6	940.586	0.36034	3970.23	1.52101	737.254	0.28244	-5317	14741	-2.03696	5.64732	-119	1996.66	0.76492	3542.6	1.35718	657.845	0.25202	13	14741	0.00498	5.64732	0.99341	0.97108	0.01851	0.00344	0.94379	0.03436	0.00638	0.21251	0.67262
Right-Cerebral-White-Matter	211272	30962.3	211153	31454.6	-119.586	-0.05662	3165.27	1.49862	587.777	0.27829	-6930	11099	-3.28106	5.2549	35	1753.31	0.83012	2617.23	1.23915	486.007	0.2301	16	11099	0.00758	5.2549	0.99503	0.984	0.0114	0.00212	0.9685	0.02179	0.00405	0.84025	0.07559
Right-Hippocampus	4183.83	498.817	4192.93	496.301	9.10345	0.21735	72.6982	1.73571	13.4997	0.32231	-95	239	-2.26818	5.70626	-7	50.8276	1.21354	51.9148	1.2395	9.64034	0.23017	3	239	0.07163	5.70626	0.98953	0.95786	0.02237	0.00415	0.91912	0.04035	0.00749	0.50562	0.29617
Right-Inf-Lat-Vent	334.034	266.78	343.172	294.913	9.13793	2.69871	37.4592	11.0629	6.95601	2.05432	-55	170	-16.2432	50.2062	5	20.7931	6.14084	32.2782	9.53275	5.99392	1.77019	0	170	0	50.2062	0.99091	0.92296	0.05439	0.0101	0.85694	0.0878	0.0163	0.19962	0.6998
Right-Lateral-Ventricle	7806.34	4347.54	7816.9	4279.22	10.5517	0.13508	138.252	1.76982	25.6727	0.32865	-473	397	-6.05508	5.08217	9	79.931	1.02323	112.302	1.43763	20.8539	0.26696	2	473	0.0256	6.05508	0.9995	0.97645	0.01966	0.00365	0.95399	0.03532	0.00656	0.68419	0.16482
Right-Pallidum	1544.83	191.616	1550.86	180.181	6.03448	0.38986	44.8756	2.89923	8.33319	0.53837	-110	90	-7.10666	5.81454	3	33	2.132	30.3915	1.96347	5.64356	0.36461	0	110	0	7.10666	0.97136	0.94434	0.02854	0.0053	0.89455	0.051	0.00947	0.47498	0.32332
Right-Putamen	5881.41	697.249	5903	697.112	21.5862	0.36635	170.732	2.89759	31.7041	0.53807	-260	668	-4.41261	11.337	-13	93.3103	1.58362	143.576	2.43671	26.6614	0.45249	1	668	0.01697	11.337	0.97056	0.96746	0.01735	0.00322	0.93697	0.03224	0.00599	0.50155	0.29969
Right-Thalamus-Proper	7346	971.88	7380.86	952.979	34.8621	0.47345	143.758	1.95233	26.6952	0.36254	-114	690	-1.54819	9.37063	15	74.4483	1.01105	127.219	1.72771	23.624	0.32083	2	690	0.02716	9.37063	0.98858	0.97527	0.0139	0.00258	0.95173	0.02603	0.00483	0.2022	0.69421
Right-VentralDC	3861.83	434.374	3872.93	431.843	11.1035	0.28711	61.3027	1.58512	11.3836	0.29435	-96	132	-2.4823	3.41316	-3	49.6552	1.28395	36.4969	0.94371	6.77729	0.17524	2	132	0.05171	3.41316	0.99	0.94545	0.03548	0.00659	0.89654	0.06113	0.01135	0.33772	0.47144
Right-choroid-plexus	1797.93	427.288	1759.45	411.997	-38.4828	-2.16355	156.03	8.77217	28.974	1.62895	-580	206	-32.6083	11.5816	-28	92.6897	5.21112	130.311	7.32622	24.1981	1.36044	1	580	0.05622	32.6083	0.92914	0.88864	0.05646	0.01048	0.7996	0.08694	0.01614	0.19484	0.71032
Right-vessel	62.2759	46.3118	64.0345	43.4844	1.75862	2.7846	10.4903	16.6104	1.948	3.08447	-24	24	-38.0016	38.0016	2	7.75862	12.285	7.1347	11.2971	1.32488	2.09782	0	24	0	38.0016	0.9729	0.8867	0.10129	0.01881	0.79647	0.14914	0.02769	0.37434	0.42673
ctx-lh-bankssts	2524.14	521.796	2462.24	443.653	-61.8965	-2.48263	303.253	12.1633	56.3127	2.25866	-1332	433	-53.4255	17.3673	13	179.069	7.18232	250.439	10.0449	46.5053	1.86529	13	1332	0.52142	53.4255	0.80269	0.88073	0.05564	0.01033	0.78688	0.08064	0.01498	0.28106	0.5512
ctx-lh-caudalanteriorcingulate	2015.28	673.438	1948.93	638.195	-66.3448	-3.34719	135.31	6.82659	25.1264	1.26767	-390	225	-19.6761	11.3516	-39	111.241	5.61229	100.255	5.05801	18.6169	0.93925	6	390	0.30271	19.6761	0.97441	0.87777	0.02835	0.00526	0.78216	0.04415	0.0082	0.01339	1.87337
ctx-lh-caudalmiddlefrontal	7151.93	1129.35	7075.76	1132.9	-76.1724	-1.07076	346.587	4.872	64.3595	0.90471	-1076	427	-15.1254	6.00238	-41	225.069	3.16382	271.416	3.81532	50.4007	0.70849	27	1076	0.37954	15.1254	0.95242	0.93193	0.04398	0.00817	0.87253	0.06804	0.01263	0.24654	0.6081
ctx-lh-cuneus	2886.1	426.761	2865.38	405.773	-20.7241	-0.72065	266.379	9.26297	49.4654	1.72009	-899	375	-31.2615	13.0401	2	176.172	6.12616	198.135	6.88988	36.7928	1.27942	2	899	0.06955	31.2615	0.80062	0.84283	0.0566	0.01051	0.72835	0.0794	0.01474	0.67844	0.16849
ctx-lh-entorhinal	1736.55	478	1645.83	318.935	-90.7241	-5.36452	336.187	19.8787	62.4284	3.69139	-1329	242	-78.5837	14.3095	3	208.586	12.3337	276.559	16.3529	51.3556	3.03666	3	1329	0.17739	78.5837	0.64691	0.79189	0.1159	0.02152	0.65548	0.13367	0.02482	0.15727	0.80335
ctx-lh-frontalpole	702.724	194.114	696.828	208.557	-5.89655	-0.84263	87.9721	12.5715	16.336	2.33446	-189	220	-27.0086	31.4386	-11	66.2414	9.46609	56.8373	8.12221	10.5544	1.50826	5	220	0.71451	31.4386	0.90739	0.85131	0.04179	0.00776	0.74111	0.06209	0.01153	0.72084	0.14216
ctx-lh-fusiform	8878	1696.17	9092.31	1764.7	214.31	2.38516	418.903	4.66217	77.7884	0.86574	-851	1168	-9.47118	12.9992	145	340.862	3.79361	320.488	3.56686	59.5132	0.66235	4	1168	0.04452	12.9992	0.96417	0.88928	0.03455	0.00642	0.80064	0.05406	0.01004	0.0102	1.99145
ctx-lh-inferiorparietal	12130.9	2546.83	12027.1	2291.21	-103.793	-0.85929	836.483	6.9251	155.331	1.28596	-2632	1612	-21.7899	13.3455	-46	520.828	4.31184	655.677	5.42824	121.756	1.008	14	2632	0.1159	21.7899	0.94148	0.92467	0.02736	0.00508	0.8599	0.04592	0.00853	0.50947	0.29288
ctx-lh-inferiortemporal	9092.38	1958.89	9159.17	2259.08	66.7931	0.73192	758.206	8.3084	140.795	1.54283	-1555	2876	-17.0397	31.5151	55	477.759	5.23527	585.74	6.41852	108.769	1.19189	44	2876	0.48215	31.5151	0.93737	0.88833	0.03773	0.00701	0.7991	0.05927	0.01101	0.63889	0.19457
ctx-lh-insula	6401.48	772.764	6376.48	742.794	-25	-0.3913	129.666	2.02953	24.0784	0.37687	-319	223	-4.99297	3.49038	-15	101.483	1.5884	82.4264	1.29013	15.3062	0.23957	5	319	0.07826	4.99297	0.98533	0.92445	0.01316	0.00244	0.85951	0.02274	0.00422	0.30803	0.51141
ctx-lh-isthmuscingulate	2411.76	410.667	2422.66	435.216	10.8965	0.45079	221.796	9.17571	41.1865	1.70389	-346	1011	-14.314	41.8251	-21	119.31	4.93588	185.938	7.69227	34.5279	1.42842	7	1011	0.28959	41.8251	0.86672	0.86008	0.04324	0.00803	0.75451	0.06008	0.01116	0.79328	0.10057
ctx-lh-lateraloccipital	11574.9	1633.51	11772.7	2037.93	197.862	1.69493	747.632	6.40436	138.832	1.18926	-1098	2851	-9.40568	24.4222	81	479.724	4.10941	600.955	5.1479	111.594	0.95594	6	2851	0.0514	24.4222	0.91527	0.90324	0.03328	0.00618	0.82356	0.05294	0.00983	0.16515	0.78211
ctx-lh-lateralorbitofrontal	7926.52	1160.85	7989.76	1129.93	63.2414	0.79468	307.021	3.85795	57.0123	0.7164	-635	1113	-7.97925	13.9857	11	219.586	2.75927	220.145	2.76629	40.8799	0.51369	11	1113	0.13822	13.9857	0.9638	0.92229	0.01425	0.00265	0.85578	0.02405	0.00447	0.27676	0.5579
ctx-lh-lingual	6475.86	970.933	6455.79	1016.21	-20.069	-0.31039	409.607	6.33495	76.0621	1.17637	-1212	1047	-18.7447	16.1928	20	271.862	4.2046	302.732	4.68203	56.2159	0.86943	6	1212	0.0928	18.7447	0.91768	0.88218	0.03463	0.00643	0.7892	0.05212	0.00968	0.79383	0.10027
ctx-lh-medialorbitofrontal	4403.41	645.533	4358.03	675.776	-45.3793	-1.03589	394.35	9.00193	73.2289	1.67162	-1393	596	-31.7984	13.6051	46	255.241	5.82647	300.283	6.85464	55.7611	1.27287	8	1393	0.18262	31.7984	0.8254	0.8902	0.02719	0.00505	0.80213	0.04291	0.00797	0.54047	0.26723
ctx-lh-middletemporal	9905.14	1656.89	9868.38	1683.29	-36.7586	-0.3718	440.644	4.45691	81.8255	0.82763	-1287	678	-13.0174	6.85766	-93	348.621	3.52614	263.988	2.67011	49.0213	0.49583	38	1287	0.38435	13.0174	0.96614	0.89395	0.04542	0.00843	0.80823	0.06822	0.01267	0.65672	0.18262
ctx-lh-paracentral	3991.55	680.109	4035.14	760.472	43.5862	1.08603	432.352	10.7729	80.2857	2.00047	-977	1989	-24.3438	49.5597	0	192.138	4.78748	388.15	9.67147	72.0776	1.79595	0	1989	0	49.5597	0.8244	0.91133	0.04386	0.00814	0.8371	0.06721	0.01248	0.5915	0.22804
ctx-lh-parahippocampal	2327.28	408.343	2292.07	426.175	-35.2069	-1.52432	263.12	11.3921	48.8602	2.11546	-872	457	-37.7543	19.7864	-5	173.621	7.51711	198.23	8.58262	36.8105	1.59375	5	872	0.21648	37.7543	0.80424	0.84127	0.0742	0.01378	0.72603	0.09516	0.01767	0.47715	0.32134
ctx-lh-parsopercularis	5108.03	710.71	5076.21	686.437	-31.8276	-0.62504	183.208	3.59787	34.0208	0.66811	-574	333	-11.2723	6.53952	-9	136.034	2.67147	124.29	2.44083	23.08	0.45325	5	574	0.09819	11.2723	0.96577	0.92219	0.01757	0.00326	0.85561	0.02973	0.00552	0.35751	0.44671
ctx-lh-parsorbitalis	2517.17	528.684	2481.14	564.498	-36.0345	-1.44187	194.181	7.76987	36.0585	1.44283	-375	509	-15.0051	20.3669	-61	148.034	5.92338	127.884	5.11709	23.7475	0.95022	2	509	0.08003	20.3669	0.93697	0.89273	0.03068	0.0057	0.80624	0.04885	0.00907	0.32619	0.48653
ctx-lh-parstriangularis	3676.17	647.142	3721.34	850.974	45.1724	1.22129	367.732	9.94203	68.2861	1.84619	-759	1317	-20.5204	35.6065	10	239.103	6.46442	279.514	7.55695	51.9044	1.40329	10	1317	0.27036	35.6065	0.88385	0.90061	0.0382	0.00709	0.81919	0.06026	0.01119	0.51369	0.2893
ctx-lh-pericalcarine	2061.83	429.708	2047.1	407.53	-14.7241	-0.71669	277.541	13.5091	51.538	2.50859	-858	667	-41.7627	32.4659	3	165.069	8.03464	221.433	10.7781	41.119	2.00145	3	858	0.14602	41.7627	0.78659	0.83606	0.08264	0.01535	0.7183	0.11074	0.02056	0.77721	0.10946
ctx-lh-postcentral	10575.4	1639.76	10662.3	1633.52	86.931	0.81865	255.732	2.40828	47.4882	0.44721	-650	611	-6.12119	5.75392	34	187	1.76102	192.374	1.81163	35.723	0.33641	2	650	0.01883	6.12119	0.98681	0.93131	0.02174	0.00404	0.87146	0.0364	0.00676	0.07783	1.10887
ctx-lh-posteriorcingulate	3695.9	684.935	3709.62	707.288	13.7241	0.37065	112.716	3.04412	20.9309	0.56528	-215	300	-5.80648	8.10207	4	89.7241	2.42317	67.5436	1.82414	12.5425	0.33873	3	300	0.08102	8.10207	0.98715	0.88889	0.02059	0.00382	0.8	0.03337	0.0062	0.51738	0.28619
ctx-lh-precentral	14447.9	2013	14553.9	2020.36	106	0.73099	453.226	3.12551	84.1619	0.58039	-746	1460	-5.14452	10.0684	80	302	2.08263	350.128	2.41453	65.0172	0.44837	3	1460	0.02069	10.0684	0.97424	0.94351	0.01915	0.00356	0.89306	0.03296	0.00612	0.21826	0.66103
ctx-lh-precuneus	10057.4	1537.1	10108.1	1510.44	50.7241	0.50308	277.359	2.75083	51.5043	0.51082	-682	578	-6.76403	5.73257	38	215.345	2.13578	177.661	1.76203	32.9907	0.3272	9	682	0.08926	6.76403	0.98345	0.92216	0.01334	0.00248	0.85556	0.02297	0.00426	0.33313	0.47739
ctx-lh-rostralanteriorcingulate	2307.14	598.815	2272.21	596.639	-34.931	-1.52559	101.477	4.43196	18.8439	0.82299	-231	227	-10.0888	9.91408	-39	83.8276	3.66112	65.4474	2.85837	12.1533	0.53079	3	231	0.13102	10.0888	0.98439	0.884	0.01728	0.00321	0.79211	0.02764	0.00513	0.07434	1.12875
ctx-lh-rostralmiddlefrontal	16377.6	3644.12	16402.3	3684.73	24.7241	0.15085	557.196	3.39962	103.469	0.63129	-1373	1371	-8.37709	8.36488	-15	376.862	2.29935	404.973	2.47086	75.2016	0.45883	4	1373	0.02441	8.37709	0.98881	0.93386	0.01873	0.00348	0.87593	0.03233	0.006	0.81288	0.08997
ctx-lh-superiorfrontal	23939.5	2981.34	23860.7	2836.07	-78.8276	-0.32982	532.571	2.22832	98.8959	0.41379	-2195	1024	-9.18406	4.2845	-61	309.931	1.29678	436.554	1.82658	81.0661	0.33919	2	2195	0.00837	9.18406	0.98346	0.94965	0.01199	0.00223	0.90413	0.0215	0.00399	0.43211	0.3644
ctx-lh-superiorparietal	14080.3	2125.51	13944.8	2139.46	-135.517	-0.96711	332.034	2.36954	61.6572	0.44001	-1106	556	-7.8929	3.96786	-103	268.483	1.91601	233.688	1.6677	43.3948	0.30968	39	1106	0.27832	7.8929	0.98629	0.93402	0.01752	0.00325	0.8762	0.03039	0.00564	0.03639	1.43903
ctx-lh-superiortemporal	12024.2	1851.75	12035.1	1796.48	10.8621	0.09029	744.272	6.18699	138.208	1.14889	-2989	1294	-24.847	10.7568	71	434.379	3.61091	598.865	4.97824	111.206	0.92444	52	2989	0.43227	24.847	0.91952	0.91832	0.02637	0.0049	0.84897	0.04366	0.00811	0.93792	0.02784
ctx-lh-supramarginal	11010.9	1773.08	11113.7	1644.75	102.793	0.92922	601.346	5.436	111.667	1.00944	-1412	2345	-12.7641	21.1981	69	378.793	3.42418	473.236	4.27792	87.8777	0.79439	9	2345	0.08136	21.1981	0.93849	0.92483	0.03517	0.00653	0.86017	0.0571	0.0106	0.36516	0.43752
ctx-lh-temporalpole	2052.14	373.436	1994.28	386.574	-57.8621	-2.85992	214.853	10.6194	39.8972	1.97198	-562	356	-27.7777	17.5958	-30	160.966	7.95596	150.977	7.46226	28.0357	1.38571	2	562	0.09885	27.7777	0.83464	0.84536	0.06767	0.01257	0.73215	0.09518	0.01768	0.15809	0.80109
ctx-lh-transversetemporal	1259.48	286.101	1261.55	271.798	2.06897	0.16414	75.2932	5.9732	13.9816	1.1092	-161	181	-12.7725	14.3592	2	57.0345	4.52469	48.0041	3.80828	8.91413	0.70718	2	181	0.15867	14.3592	0.9648	0.87337	0.03472	0.00645	0.7752	0.05416	0.01006	0.88342	0.05383
ctx-rh-bankssts	2383.24	416.025	2381.21	428.546	-2.03448	-0.0854	161.075	6.76153	29.9108	1.25558	-419	359	-17.5886	15.07	-9	111	4.65951	114.841	4.82073	21.3254	0.89519	0	419	0	17.5886	0.92968	0.89469	0.03146	0.00584	0.80944	0.05041	0.00936	0.94625	0.02399
ctx-rh-caudalanteriorcingulate	2269.14	638.553	2198.93	574.045	-70.2069	-3.14261	156.612	7.01027	29.0821	1.30177	-625	218	-27.9763	9.75813	-52	112.345	5.02879	128.686	5.76026	23.8965	1.06965	5	625	0.22381	27.9763	0.9613	0.89055	0.02932	0.00545	0.80269	0.04631	0.0086	0.02256	1.64666
ctx-rh-caudalmiddlefrontal	6889	1532.79	6934.34	1473.05	45.3448	0.65606	251.907	3.64466	46.7779	0.6768	-574	627	-8.30479	9.07161	129	203	2.93706	151.347	2.18973	28.1044	0.40662	37	627	0.53533	9.07161	0.98599	0.93493	0.01908	0.00354	0.87781	0.03285	0.0061	0.34066	0.46767
ctx-rh-cuneus	3103.14	548.641	3124.72	501.682	21.5862	0.69321	168.18	5.40088	31.2302	1.00292	-398	359	-12.7813	11.5288	34	136	4.36747	98.0328	3.1482	18.2042	0.58461	10	398	0.32114	12.7813	0.94972	0.85496	0.04254	0.0079	0.74666	0.06265	0.01163	0.49513	0.30528
ctx-rh-entorhinal	1517.28	333.97	1615.72	402.604	98.4483	6.2846	292.089	18.646	54.2396	3.46247	-417	860	-26.6198	54.8995	82	212.034	13.5356	220.884	14.1005	41.0172	2.6184	7	860	0.44686	54.8995	0.66763	0.77821	0.12653	0.0235	0.63695	0.14973	0.0278	0.08024	1.09561
ctx-rh-frontalpole	884.621	185.314	881.448	195.451	-3.17241	-0.35926	85.0643	9.63318	15.796	1.78884	-181	172	-20.4975	19.4783	-21	66.2759	7.50547	51.9326	5.88115	9.64364	1.0921	5	181	0.56623	20.4975	0.90339	0.84977	0.05406	0.01004	0.73879	0.07758	0.01441	0.84228	0.07454
ctx-rh-fusiform	8779.38	1503.75	8620.55	1413.77	-158.828	-1.82561	367.525	4.22444	68.2477	0.78446	-1085	523	-12.4713	6.01152	-170	302.552	3.47762	257.672	2.96176	47.8486	0.54999	7	1085	0.08046	12.4713	0.96355	0.8912	0.0309	0.00574	0.80375	0.04985	0.00926	0.02741	1.56212
ctx-rh-inferiorparietal	14756.1	2480.26	14752.7	2511.6	-3.48276	-0.0236	503.663	3.41365	93.5279	0.6339	-1147	1249	-7.77395	8.46527	-56	393	2.66361	306.144	2.07493	56.8494	0.3853	22	1249	0.14911	8.46527	0.98033	0.93839	0.01663	0.00309	0.88392	0.02923	0.00543	0.97056	0.01298
ctx-rh-inferiortemporal	9137.17	2781.96	9163.79	2792.16	26.6207	0.29092	533.557	5.83092	99.0791	1.08277	-1506	913	-16.4581	9.97762	55	397.931	4.34874	348.443	3.80792	64.7043	0.70711	5	1506	0.05464	16.4581	0.98226	0.8954	0.04024	0.00747	0.8106	0.06393	0.01187	0.79014	0.10229
ctx-rh-insula	6109.21	822.914	6095	804.757	-14.2069	-0.23282	139.57	2.28724	25.9174	0.42473	-369	204	-6.0471	3.34311	0	112.483	1.84334	81.1448	1.32978	15.0682	0.24693	0	369	0	6.0471	0.98565	0.92042	0.01575	0.00292	0.85257	0.02681	0.00498	0.58793	0.23068
ctx-rh-isthmuscingulate	2382.72	448.459	2318.69	444.419	-64.0345	-2.72405	160.87	6.84348	29.8728	1.2708	-417	282	-17.7393	11.9964	-45	127.69	5.43197	115.061	4.89475	21.3663	0.90893	3	417	0.12762	17.7393	0.92732	0.85057	0.04274	0.00794	0.74	0.06141	0.0114	0.0409	1.38832
ctx-rh-lateraloccipital	11492.7	1788.97	11429.2	1690.29	-63.5517	-0.55451	521.878	4.55353	96.9104	0.84557	-1644	1490	-14.3444	13.0007	-64	311.69	2.71958	419.428	3.65963	77.8858	0.67958	9	1644	0.07853	14.3444	0.9559	0.91326	0.02788	0.00518	0.84037	0.04603	0.00855	0.51732	0.28624
ctx-rh-lateralorbitofrontal	7445.17	1090.76	7521.93	1016.05	76.7586	1.0257	234.702	3.13623	43.583	0.58238	-271	607	-3.62128	8.11112	-12	191.103	2.55365	152.848	2.04245	28.3831	0.37927	9	607	0.12026	8.11112	0.97344	0.92132	0.01594	0.00296	0.85412	0.02717	0.00505	0.08912	1.05001
ctx-rh-lingual	6433.41	902.811	6334.38	907.848	-99.0345	-1.55132	225.69	3.5353	41.9096	0.65649	-552	363	-8.64676	5.68618	-83	182.345	2.85632	163.27	2.55753	30.3184	0.47492	6	552	0.09399	8.64676	0.9641	0.88312	0.02006	0.00373	0.79071	0.03192	0.00593	0.0253	1.59681
ctx-rh-medialorbitofrontal	4738.55	788.433	4765.79	792.076	27.2414	0.57324	257.662	5.42198	47.8466	1.00684	-521	576	-10.9634	12.1208	40	198.897	4.18538	161.819	3.40516	30.0491	0.63232	1	576	0.02104	12.1208	0.94805	0.90293	0.01964	0.00365	0.82304	0.03253	0.00604	0.57366	0.24135
ctx-rh-middletemporal	10808.7	1907.04	10830.1	1626.01	21.4483	0.19824	466.474	4.31147	86.622	0.80062	-1192	1112	-11.0173	10.2779	20	342.552	3.16609	310.712	2.87181	57.6978	0.53328	16	1192	0.14788	11.0173	0.96646	0.91492	0.02386	0.00443	0.84318	0.0398	0.00739	0.80624	0.09353
ctx-rh-paracentral	4665.72	744.732	4625.76	750.997	-39.9655	-0.86026	162.777	3.50379	30.2269	0.65064	-411	269	-8.84681	5.79025	-21	121.069	2.60602	113.883	2.45135	21.1476	0.4552	1	411	0.02153	8.84681	0.97571	0.92271	0.01836	0.00341	0.85652	0.03151	0.00585	0.19681	0.70596
ctx-rh-parahippocampal	2166.03	398.046	2163.31	365.191	-2.72414	-0.12585	235.062	10.859	43.6499	2.01646	-746	439	-34.4625	20.2802	12	161.276	7.45036	168.294	7.77457	31.2514	1.4437	10	746	0.46196	34.4625	0.81655	0.86056	0.04489	0.00834	0.75525	0.06661	0.01237	0.95068	0.02197
ctx-rh-parsopercularis	4302.66	1024.32	4258.72	952.668	-43.931	-1.02626	247.083	5.77203	45.8821	1.07184	-934	453	-21.8189	10.5824	-57	169.379	3.95682	182.578	4.26515	33.9039	0.79202	14	934	0.32705	21.8189	0.96889	0.90768	0.02838	0.00527	0.83097	0.04555	0.00846	0.34652	0.46027
ctx-rh-parsorbitalis	2749.07	450.045	2770.72	398.786	21.6552	0.78464	165.46	5.99515	30.7252	1.11327	-506	452	-18.334	16.3774	30	114.207	4.13809	119.807	4.34099	22.2476	0.8061	5	506	0.18117	18.334	0.92555	0.90178	0.03432	0.00637	0.82113	0.05415	0.01005	0.48675	0.31269
ctx-rh-parstriangularis	4233.59	860.688	4247.07	912.968	13.4828	0.31797	328.954	7.75775	61.0853	1.44058	-363	1218	-8.56066	28.7242	-69	210.931	4.9744	249.636	5.88719	46.3563	1.09322	11	1218	0.25941	28.7242	0.93344	0.91301	0.02871	0.00533	0.83994	0.04667	0.00867	0.82691	0.08254
ctx-rh-pericalcarine	2440.86	550.109	2512.83	513.547	71.9655	2.90553	321.191	12.9677	59.6436	2.40805	-547	1089	-22.0846	43.9672	52	202.241	8.16528	257.226	10.3852	47.7656	1.92849	15	1089	0.60561	43.9672	0.81525	0.83829	0.06666	0.01238	0.7216	0.08912	0.01655	0.23769	0.624
ctx-rh-postcentral	9849.83	1531.8	9791.28	1469.61	-58.5517	-0.59622	271.131	2.76085	50.3478	0.51268	-649	394	-6.60859	4.01199	-24	196.966	2.00565	192.046	1.95556	35.6621	0.36314	5	649	0.05091	6.60859	0.98349	0.9317	0.01877	0.00348	0.87214	0.03178	0.0059	0.25467	0.59403
ctx-rh-posteriorcingulate	3569.83	695.571	3535.24	629.031	-34.5862	-0.97356	134.321	3.78099	24.9428	0.70211	-321	361	-9.0358	10.1618	-46	98.7931	2.78092	95.7726	2.69589	17.7845	0.50061	4	361	0.1126	10.1618	0.97884	0.88713	0.02393	0.00444	0.79715	0.03792	0.00704	0.1765	0.75326
ctx-rh-precentral	14033.8	1719.13	14028.5	1835.67	-5.27586	-0.0376	310.107	2.21014	57.5854	0.41041	-457	952	-3.25705	6.78492	-46	212.103	1.51166	222.712	1.58727	41.3565	0.29475	12	952	0.08552	6.78492	0.98531	0.94324	0.0152	0.00282	0.89257	0.02655	0.00493	0.92765	0.03261
ctx-rh-precuneus	10826.4	1679.47	10802.2	1692.26	-24.2069	-0.22384	206.554	1.91001	38.3561	0.35468	-601	393	-5.55747	3.63409	-8	148.966	1.37749	142.437	1.31712	26.4499	0.24458	3	601	0.02774	5.55747	0.99265	0.92186	0.01557	0.00289	0.85504	0.02621	0.00487	0.53309	0.2732
ctx-rh-rostralanteriorcingulate	1811.41	386.481	1826.34	404.908	14.931	0.82089	112.115	6.16398	20.8193	1.14462	-128	479	-7.0373	26.3349	9	65.8966	3.62292	91.1225	5.00982	16.921	0.9303	6	479	0.32987	26.3349	0.96054	0.87062	0.04726	0.00878	0.77088	0.07035	0.01306	0.47921	0.31948
ctx-rh-rostralmiddlefrontal	16591.5	3141.15	16540.5	3217.2	-50.9655	-0.30765	342.896	2.06988	63.6743	0.38437	-836	1007	-5.04648	6.07872	-98	256.138	1.54617	228.732	1.38073	42.4745	0.2564	18	1007	0.10866	6.07872	0.99426	0.93495	0.01321	0.00245	0.87784	0.0232	0.00431	0.43021	0.36632
ctx-rh-superiorfrontal	23660.8	3888.74	23733.3	3767.53	72.4828	0.30587	358.09	1.51111	66.4956	0.28061	-722	635	-3.04679	2.67966	59	291.103	1.22844	214.248	0.90411	39.7848	0.16789	41	722	0.17302	3.04679	0.9956	0.95087	0.00858	0.00159	0.90634	0.01561	0.0029	0.28499	0.54517
ctx-rh-superiorparietal	14112.3	2286.45	14159.4	2316.81	47.1724	0.33371	275.336	1.94779	51.1287	0.36169	-446	699	-3.1551	4.94487	-27	204.897	1.44948	186.099	1.3165	34.5577	0.24447	27	699	0.191	4.94487	0.99288	0.93883	0.01035	0.00192	0.88472	0.01827	0.00339	0.36409	0.43879
ctx-rh-superiortemporal	11488.7	1660.86	11574.5	1713.4	85.7586	0.74368	355.568	3.08342	66.0274	0.57258	-416	1261	-3.60748	10.9352	71	257.552	2.23344	255.625	2.21673	47.4684	0.41164	4	1261	0.03469	10.9352	0.97728	0.93755	0.01297	0.00241	0.88244	0.02282	0.00424	0.2046	0.6891
ctx-rh-supramarginal	10503.9	1600.8	10504.4	1598.9	0.55172	0.00525	384.165	3.65726	71.3376	0.67914	-888	1032	-8.45378	9.82467	10	279.034	2.65642	258.731	2.46313	48.0451	0.45739	1	1032	0.00952	9.82467	0.97215	0.93277	0.01917	0.00356	0.87401	0.03309	0.00614	0.99388	0.00266
ctx-rh-temporalpole	1894.93	391.903	1872.31	496.214	-22.6207	-1.20092	286.708	15.2211	53.2404	2.82649	-730	506	-38.7552	26.8632	4	202.621	10.757	200.525	10.6457	37.2365	1.97686	4	730	0.21236	38.7552	0.79963	0.81638	0.12025	0.02233	0.68974	0.14762	0.02741	0.67417	0.17123
ctx-rh-transversetemporal	903.655	191.987	915.379	206.249	11.7241	1.28905	103.13	11.339	19.1508	2.1056	-114	464	-12.5341	51.0161	-12	56.069	6.1647	86.7307	9.5359	16.1055	1.77077	0	464	0	51.0161	0.86874	0.85764	0.0535	0.00993	0.75076	0.07267	0.01349	0.54534	0.26333
wm-lh-bankssts	2825.83	569.37	2799.79	541.426	-26.0345	-0.92557	171.323	6.09081	31.8139	1.13103	-566	263	-20.1222	9.35008	-14	122.172	4.34343	120.807	4.29489	22.4333	0.79754	14	566	0.49772	20.1222	0.95298	0.92809	0.03162	0.00587	0.86583	0.05109	0.00949	0.42007	0.37667
wm-lh-caudalanteriorcingulate	2636.76	487.41	2643.48	506.168	6.72414	0.25469	131.315	4.97382	24.3845	0.92361	-245	233	-9.27988	8.82535	5	113.69	4.30623	62.4775	2.36646	11.6018	0.43944	5	245	0.18939	9.27988	0.96617	0.91156	0.02288	0.00425	0.83749	0.03799	0.00705	0.78476	0.10526
wm-lh-caudalmiddlefrontal	6695.21	949.693	6663.31	853.617	-31.8966	-0.47755	239.18	3.58094	44.4147	0.66496	-488	474	-7.3062	7.0966	-88	198.172	2.96698	132.612	1.98543	24.6255	0.36869	1	488	0.01497	7.3062	0.96549	0.92788	0.05021	0.00932	0.86545	0.07532	0.01399	0.47861	0.32002
wm-lh-cuneus	2259.31	281.942	2211.62	274.973	-47.6897	-2.13332	248.096	11.0982	46.0704	2.06088	-576	327	-25.7664	14.6278	-23	181	8.09675	173.137	7.745	32.1507	1.43821	4	576	0.17893	25.7664	0.60237	0.87773	0.05466	0.01015	0.7821	0.08136	0.01511	0.30946	0.5094
wm-lh-entorhinal	782.31	266.235	769.414	238.027	-12.8965	-1.66222	101.525	13.0854	18.8527	2.4299	-184	200	-23.7156	25.7778	-16	81.1034	10.4533	60.5548	7.80484	11.2447	1.44932	2	200	0.25778	25.7778	0.92061	0.83902	0.1097	0.02037	0.72269	0.13755	0.02554	0.49955	0.30142
wm-lh-frontalpole	161.552	44.114	156	44.4635	-5.55172	-3.49658	25.0693	15.7891	4.65525	2.93197	-60	64	-37.7891	40.3084	-6	18.931	11.9231	17.0062	10.7108	3.15796	1.98894	1	64	0.62982	40.3084	0.83766	0.82463	0.0669	0.01242	0.70159	0.0921	0.0171	0.24305	0.61431
wm-lh-fusiform	6273.28	1129.11	6326.21	1117.09	52.931	0.84021	240.644	3.81991	44.6865	0.70934	-515	546	-8.17494	8.66702	25	185.207	2.93991	159.012	2.5241	29.5277	0.46871	12	546	0.19048	8.66702	0.97673	0.9102	0.02493	0.00463	0.83519	0.04146	0.0077	0.24617	0.60876
wm-lh-inferiorparietal	9152.17	1686.81	9025.55	1366.33	-126.621	-1.39314	829.144	9.12264	153.968	1.69403	-3976	1000	-43.7458	11.0025	-45	388.138	4.27048	740.307	8.14521	137.472	1.51253	1	3976	0.011	43.7458	0.85562	0.9339	0.031	0.00576	0.87599	0.05024	0.00933	0.41781	0.37902
wm-lh-inferiortemporal	5459.14	806.322	5534.62	1017.65	75.4828	1.37319	525.76	9.5647	97.6312	1.77612	-709	2489	-12.8982	45.2802	23	261.828	4.7632	459.698	8.3629	85.3639	1.55295	4	2489	0.07277	45.2802	0.83812	0.8983	0.04143	0.00769	0.81538	0.06405	0.01189	0.44592	0.35075
wm-lh-insula	8949.41	1047.3	8912.28	1048.94	-37.1379	-0.41584	284.87	3.18974	52.8991	0.59232	-737	530	-8.2523	5.93449	-56	233.483	2.61434	161.612	1.80959	30.0106	0.33603	32	737	0.35831	8.2523	0.9637	0.92594	0.01643	0.00305	0.8621	0.02774	0.00515	0.48844	0.31119
wm-lh-isthmuscingulate	3139.38	493.472	3117.62	483.192	-21.7586	-0.6955	237.852	7.60274	44.168	1.41179	-413	792	-13.2012	25.3157	-29	169.276	5.41077	165.488	5.28968	30.7303	0.98227	0	792	0	25.3157	0.88431	0.89731	0.03958	0.00735	0.81375	0.06199	0.01151	0.62611	0.20335
wm-lh-lateraloccipital	8259.48	1295.97	8493.97	1656.74	234.483	2.79922	795.973	9.5022	147.809	1.76451	-1047	3177	-12.4989	37.9265	91	480.966	5.74169	671.513	8.01642	124.697	1.48861	12	3177	0.14325	37.9265	0.84987	0.9166	0.03756	0.00697	0.84603	0.05991	0.01113	0.12388	0.907
wm-lh-lateralorbitofrontal	6697.45	766.24	6762.69	770.226	65.2414	0.9694	199.721	2.96759	37.0872	0.55107	-231	490	-3.43236	7.28076	32	164.552	2.44502	127.485	1.89426	23.6734	0.35176	2	490	0.02972	7.28076	0.96381	0.94411	0.01119	0.00208	0.89413	0.01995	0.0037	0.08948	1.04828
wm-lh-lingual	5418.34	917.553	5308.59	748.021	-109.759	-2.04641	508.618	9.483	94.4479	1.76095	-1444	585	-26.9229	10.9071	31	349.621	6.51856	380.222	7.08911	70.6055	1.31641	10	1444	0.18645	26.9229	0.81339	0.896	0.03967	0.00737	0.8116	0.06188	0.01149	0.255	0.59346
wm-lh-medialorbitofrontal	3051.21	541.345	3038.62	520.867	-12.5862	-0.41335	215.815	7.08772	40.0758	1.31616	-674	394	-22.1353	12.9396	-21	148.655	4.88208	154.443	5.07215	28.6793	0.94187	10	674	0.32842	22.1353	0.91993	0.92709	0.01818	0.00338	0.86408	0.03137	0.00583	0.7558	0.12159
wm-lh-middletemporal	4678.24	939.042	4640.41	887.544	-37.8276	-0.81187	335.688	7.20464	62.3357	1.33787	-1151	395	-24.7031	8.47762	48	229.138	4.91783	244.518	5.24792	45.4059	0.97452	8	1151	0.1717	24.7031	0.93393	0.87906	0.05494	0.0102	0.78422	0.07915	0.0147	0.54885	0.26055
wm-lh-paracentral	4109.48	671.785	4130.34	726.761	20.8621	0.50637	332.106	8.06099	61.6705	1.49689	-804	1412	-19.515	34.2726	-16	171.966	4.17401	283.049	6.87026	52.5609	1.27578	2	1412	0.04854	34.2726	0.89065	0.9308	0.03618	0.00672	0.87056	0.05867	0.01089	0.73767	0.13214
wm-lh-parahippocampal	1605.97	325.084	1633.28	355.618	27.3103	1.68622	162.756	10.049	30.2231	1.86606	-256	622	-15.8062	38.404	10	111.103	6.85984	120.321	7.42899	22.3431	1.37953	9	622	0.55569	38.404	0.88657	0.88235	0.06683	0.01241	0.78947	0.09319	0.01731	0.3739	0.42724
wm-lh-parsopercularis	3728.93	610.287	3727.24	579.407	-1.68966	-0.04532	138.267	3.70878	25.6755	0.6887	-273	377	-7.32279	10.1124	-3	102.655	2.75356	90.5879	2.42988	16.8218	0.45122	3	377	0.08047	10.1124	0.97392	0.92125	0.02279	0.00423	0.85399	0.03837	0.00712	0.948	0.02319
wm-lh-parsorbitalis	983.103	298.276	967.931	263.96	-15.1724	-1.55532	113.263	11.6106	21.0324	2.15603	-388	235	-39.7738	24.0898	7	74.9655	7.68469	85.1257	8.72622	15.8074	1.62042	2	388	0.20502	39.7738	0.92042	0.88773	0.03917	0.00727	0.79813	0.06048	0.01123	0.47666	0.3218
wm-lh-parstriangularis	2970.1	579.033	2947.28	579.87	-22.8276	-0.77154	295.135	9.9752	54.8052	1.85235	-793	711	-26.8024	24.0309	30	205.379	6.94156	209.66	7.08625	38.9329	1.31588	4	793	0.13519	26.8024	0.87375	0.90152	0.03783	0.00702	0.82069	0.06074	0.01128	0.6802	0.16736
wm-lh-pericalcarine	2976.34	531.194	2967.76	561.877	-8.58621	-0.2889	240.896	8.10536	44.7332	1.50513	-880	574	-29.6092	19.3133	2	138.448	4.65834	195.588	6.5809	36.3197	1.22204	2	880	0.06729	29.6092	0.90601	0.88525	0.06571	0.0122	0.79412	0.09708	0.01803	0.84917	0.071
wm-lh-postcentral	6942.17	1121.05	7040.62	1013.04	98.4483	1.40813	265.801	3.80183	49.358	0.70598	-274	949	-3.9191	13.5738	57	195.345	2.79407	202.894	2.90205	37.6764	0.5389	8	949	0.11443	13.5738	0.96593	0.92158	0.02575	0.00478	0.85456	0.04254	0.0079	0.05591	1.25254
wm-lh-posteriorcingulate	4565.79	735.587	4615.86	684.227	50.069	1.09063	159.876	3.48252	29.6883	0.64669	-299	376	-6.51299	8.19024	34	131.793	2.87079	100.832	2.19638	18.724	0.40786	7	376	0.15248	8.19024	0.97309	0.93375	0.01581	0.00294	0.87573	0.02774	0.00515	0.10281	0.98795
wm-lh-precentral	13149.1	1815.34	13310.1	1940.4	161.034	1.21723	490.605	3.70839	91.103	0.68863	-638	2019	-4.82252	15.2613	14	302.138	2.2838	415.937	3.14399	77.2375	0.58382	6	2019	0.04535	15.2613	0.96346	0.94701	0.0186	0.00345	0.89935	0.03228	0.00599	0.08802	1.0554
wm-lh-precuneus	9293.07	1359.2	9323.21	1340.05	30.1379	0.32378	262.223	2.81713	48.6935	0.52313	-391	568	-4.20063	6.10219	-2	203.724	2.18867	163.449	1.75598	30.3517	0.32608	0	568	0	6.10219	0.98152	0.9458	0.0136	0.00253	0.89718	0.02433	0.00452	0.54097	0.26683
wm-lh-rostralanteriorcingulate	2212.24	402.744	2192.59	412.897	-19.6552	-0.89244	104.372	4.73898	19.3814	0.88001	-176	220	-7.99123	9.98904	-32	87.5172	3.9737	57.9727	2.63223	10.7652	0.48879	1	220	0.0454	9.98904	0.96722	0.91602	0.02247	0.00417	0.84505	0.03779	0.00702	0.31921	0.49593
wm-lh-rostralmiddlefrontal	12059.1	2597.17	12051.4	2681.74	-7.65517	-0.0635	500.416	4.15103	92.925	0.77083	-1513	1443	-12.5506	11.9699	-4	294	2.43877	401.191	3.32794	74.4993	0.61798	4	1513	0.03318	12.5506	0.98264	0.94757	0.01988	0.00369	0.90036	0.03462	0.00643	0.93493	0.02922
wm-lh-superiorfrontal	18068	2796.75	18042.8	2753.06	-25.1724	-0.13942	538.687	2.98353	100.032	0.55403	-1345	1280	-7.4493	7.0893	-107	392.828	2.17568	361.96	2.00472	67.2144	0.37227	7	1345	0.03877	7.4493	0.98176	0.95412	0.01514	0.00281	0.91226	0.027	0.00501	0.80315	0.0952
wm-lh-superiorparietal	11349.6	1641.47	11283.9	1653.32	-65.6897	-0.58046	242.236	2.1405	44.9821	0.39748	-621	322	-5.48743	2.84533	-43	197.069	1.74139	151.408	1.3379	28.1157	0.24844	25	621	0.22091	5.48743	0.98877	0.94502	0.0148	0.00275	0.89577	0.02633	0.00489	0.15532	0.80876
wm-lh-superiortemporal	7238.62	1427.88	7267.45	1315.21	28.8276	0.39746	509.777	7.02847	94.6632	1.30515	-1876	1512	-25.865	20.8465	44	288.897	3.98311	417.482	5.75597	77.5245	1.06886	7	1876	0.09651	25.865	0.93313	0.91981	0.02411	0.00448	0.85153	0.04029	0.00748	0.76298	0.11749
wm-lh-supramarginal	8174.03	1268.18	8149.72	1155.04	-24.3103	-0.29785	383.823	4.70263	71.2742	0.87326	-977	892	-11.9703	10.9289	6	270.655	3.31609	268.443	3.28899	49.8487	0.61075	6	977	0.07351	11.9703	0.95142	0.93191	0.03178	0.0059	0.87249	0.05223	0.0097	0.73559	0.13337
wm-lh-temporalpole	474.828	103.746	482.724	127.535	7.89655	1.64932	71.9893	15.0361	13.3681	2.79214	-93	268	-19.4245	55.9761	-6	47.6897	9.96075	53.7727	11.2313	9.98535	2.0856	0	268	0	55.9761	0.81216	0.81631	0.06399	0.01188	0.68963	0.09008	0.01673	0.55946	0.25223
wm-lh-transversetemporal	715.207	176.791	727.517	179.743	12.3103	1.70654	68.0977	9.44015	12.6454	1.75299	-153	130	-21.2099	18.0215	27	56.5172	7.8348	38.5483	5.34382	7.15824	0.99232	10	153	1.38627	21.2099	0.92717	0.85714	0.04296	0.00798	0.75	0.06338	0.01177	0.33864	0.47026
wm-rh-bankssts	2877.97	482.136	2864.34	466.699	-13.6207	-0.4744	120.622	4.20118	22.399	0.78014	-246	186	-8.56798	6.47823	-15	101.276	3.52736	64.1777	2.23526	11.9175	0.41508	6	246	0.20898	8.56798	0.96838	0.93345	0.02332	0.00433	0.8752	0.0399	0.00741	0.54803	0.2612
wm-rh-caudalanteriorcingulate	2719.69	548.054	2682.1	544.764	-37.5862	-1.39162	159.391	5.90141	29.5982	1.09586	-336	359	-12.4403	13.2919	-36	127.241	4.71108	100.499	3.72095	18.6622	0.69096	1	359	0.03702	13.2919	0.95657	0.91009	0.02691	0.005	0.83502	0.0448	0.00832	0.21458	0.66841
wm-rh-caudalmiddlefrontal	5960.55	1182.32	6036.07	1155.23	75.5172	1.25898	348.109	5.80345	64.6422	1.07767	-1068	1016	-17.805	16.9381	58	231.931	3.86661	267.158	4.45388	49.6099	0.82706	1	1068	0.01667	17.805	0.95511	0.93359	0.0233	0.00433	0.87545	0.04013	0.00745	0.25256	0.59763
wm-rh-cuneus	2208.97	388.124	2218.86	334.265	9.89655	0.44702	153.27	6.92304	28.4615	1.28558	-284	439	-12.828	19.8291	27	111.828	5.05113	103.156	4.65944	19.1556	0.86524	16	439	0.7227	19.8291	0.91306	0.89054	0.04671	0.00867	0.80268	0.07111	0.0132	0.73065	0.13629
wm-rh-entorhinal	611.379	162.764	630.621	173.085	19.2414	3.09845	130.958	21.0882	24.3183	3.91599	-187	425	-30.1127	68.438	8	95.3793	15.359	90.0628	14.5029	16.7243	2.69312	2	425	0.32206	68.438	0.69952	0.78933	0.11651	0.02164	0.65197	0.14642	0.02719	0.43546	0.36105
wm-rh-frontalpole	210.069	59.559	200.897	61.8162	-9.17241	-4.46384	19.9626	9.71497	3.70696	1.80402	-61	26	-29.6862	12.6531	-11	16.8966	8.22286	13.7823	6.7073	2.55932	1.24551	1	61	0.48666	29.6862	0.93667	0.82279	0.06845	0.01271	0.69893	0.09501	0.01764	0.01967	1.70615
wm-rh-fusiform	6146.17	1059.63	6104.38	1006.99	-41.7931	-0.68231	217.608	3.55263	40.4089	0.65971	-551	380	-8.99551	6.2038	2	168	2.74273	141.175	2.3048	26.2156	0.42799	0	551	0	8.99551	0.97779	0.90956	0.02542	0.00472	0.83411	0.04187	0.00777	0.30987	0.50882
wm-rh-inferiorparietal	10920	1537.72	10876.8	1510.71	-43.1724	-0.39613	423.528	3.88614	78.6471	0.72164	-628	1349	-5.76231	12.378	-136	334.483	3.0691	255.796	2.3471	47.5002	0.43584	2	1349	0.01835	12.378	0.96231	0.9449	0.01582	0.00294	0.89555	0.02812	0.00522	0.5874	0.23107
wm-rh-inferiortemporal	5173.72	1231.6	5187.97	1203.26	14.2414	0.27489	296.609	5.7251	55.0788	1.06312	-727	491	-14.0325	9.47722	-3	230.034	4.4401	182.705	3.52654	33.9274	0.65486	3	727	0.05791	14.0325	0.97127	0.89853	0.03028	0.00562	0.81575	0.04894	0.00909	0.79786	0.09807
wm-rh-insula	8598.1	1012.37	8588.79	1030.57	-9.31034	-0.10834	265.265	3.08683	49.2585	0.57321	-668	397	-7.77336	4.6198	-9	211.655	2.46298	155.105	1.80492	28.8023	0.33517	9	668	0.10473	7.77336	0.96739	0.92166	0.02328	0.00432	0.85471	0.03873	0.00719	0.85145	0.06984
wm-rh-isthmuscingulate	3078.76	442.431	3030.83	433.379	-47.931	-1.56904	177.693	5.81686	32.9967	1.08016	-337	404	-11.0318	13.2251	-24	139.793	4.57619	117.108	3.83357	21.7463	0.71188	4	404	0.13094	13.2251	0.91466	0.89612	0.04176	0.00775	0.81178	0.06557	0.01218	0.15745	0.80286
wm-rh-lateraloccipital	8351.38	1345.38	8390.1	1248.9	38.7241	0.46261	400.875	4.789	74.4406	0.8893	-1258	1083	-15.0285	12.9379	7	269.207	3.21605	295.285	3.52758	54.833	0.65506	7	1258	0.08362	15.0285	0.95348	0.92671	0.02657	0.00493	0.86343	0.04452	0.00827	0.60701	0.2168
wm-rh-lateralorbitofrontal	6501.97	932.53	6531.93	913.15	29.9655	0.45981	184.232	2.82696	34.2109	0.52495	-322	524	-4.94096	8.04057	-8	138.31	2.12232	122.712	1.88297	22.7871	0.34966	8	524	0.12276	8.04057	0.98023	0.9398	0.01441	0.00268	0.88644	0.02548	0.00473	0.38853	0.41057
wm-rh-lingual	5324.76	877.278	5320.59	857.854	-4.17241	-0.07839	281.803	5.29438	52.3294	0.98314	-915	394	-17.1906	7.4023	50	197.483	3.71022	197.581	3.71207	36.6899	0.68931	15	915	0.28181	17.1906	0.94901	0.90126	0.03129	0.00581	0.82028	0.05029	0.00934	0.93702	0.02825
wm-rh-medialorbitofrontal	3194.34	509.579	3208.76	539.924	14.4138	0.45021	165.411	5.16659	30.7161	0.95941	-323	410	-10.0889	12.8063	-22	127.034	3.9679	104.22	3.25531	19.3532	0.6045	2	410	0.06247	12.8063	0.95166	0.93071	0.01292	0.0024	0.8704	0.02271	0.00422	0.64252	0.19211
wm-rh-middletemporal	5344.41	1011.77	5381.48	944.637	37.069	0.6912	237.488	4.42832	44.1005	0.82232	-376	621	-7.01107	11.5794	37	186.793	3.48303	147.262	2.74592	27.3459	0.5099	29	621	0.54075	11.5794	0.97086	0.91125	0.02409	0.00447	0.83696	0.04015	0.00746	0.40772	0.38964
wm-rh-paracentral	5200.59	820.527	5188.1	855.679	-12.4828	-0.24031	193.387	3.72302	35.911	0.69135	-512	364	-9.85687	7.00762	-29	141.931	2.73241	129.213	2.48757	23.9942	0.46193	7	512	0.13476	9.85687	0.97419	0.94278	0.0166	0.00308	0.89176	0.02951	0.00548	0.73074	0.13624
wm-rh-parahippocampal	1721.07	414.484	1708.24	334.585	-12.8276	-0.74811	164.407	9.58831	30.5295	1.78051	-645	241	-37.6169	14.0553	-17	107.655	6.27853	123.274	7.18941	22.8913	1.33504	1	645	0.05832	37.6169	0.90732	0.89717	0.05463	0.01014	0.81352	0.08171	0.01517	0.67757	0.16905
wm-rh-parsopercularis	3432.62	779.423	3448.07	778.717	15.4483	0.44903	190.646	5.54148	35.4021	1.02903	-335	420	-9.7374	12.2081	-5	151.724	4.41014	112.919	3.28221	20.9686	0.60949	5	420	0.14533	12.2081	0.97088	0.91206	0.02409	0.00447	0.83833	0.04051	0.00752	0.66592	0.17658
wm-rh-parsorbitalis	1148.9	284.321	1165.52	287.369	16.6207	1.43628	117.377	10.1431	21.7963	1.88353	-407	253	-35.1709	21.863	25	79.3103	6.8536	86.883	7.50799	16.1338	1.3942	0	407	0	35.1709	0.91686	0.89329	0.03358	0.00624	0.80716	0.05388	0.01	0.45211	0.34475
wm-rh-parstriangularis	3156.38	730.986	3122.03	694.74	-34.3448	-1.09406	196.451	6.25798	36.48	1.16208	-354	521	-11.2767	16.5966	-90	162.69	5.18251	111.362	3.54745	20.6793	0.65874	4	521	0.12742	16.5966	0.9622	0.91656	0.02392	0.00444	0.84597	0.04054	0.00753	0.35452	0.45036
wm-rh-pericalcarine	3290.97	739.711	3402.83	767.09	111.862	3.34226	482.194	14.4072	89.5412	2.67535	-611	2250	-18.2557	67.2265	13	250.897	7.49639	424.587	12.686	78.8438	2.35573	13	2250	0.38842	67.2265	0.79171	0.87989	0.07455	0.01384	0.78554	0.10199	0.01894	0.22191	0.65383
wm-rh-postcentral	6880.1	1206.65	6863.28	1087.82	-16.8276	-0.24488	297.905	4.33525	55.3196	0.80504	-701	779	-10.2013	11.3364	62	221.31	3.22061	195.738	2.84846	36.3476	0.52895	3	779	0.04366	11.3364	0.96741	0.92133	0.02543	0.00472	0.85413	0.04199	0.0078	0.76323	0.11734
wm-rh-posteriorcingulate	4127.48	720.995	4215.38	643.128	87.8966	2.10711	143.652	3.44372	26.6756	0.63948	-294	368	-7.04794	8.82191	83	133	3.18835	101.573	2.43496	18.8616	0.45216	0	368	0	8.82191	0.97049	0.91912	0.02018	0.00375	0.85034	0.03439	0.00639	0.00267	2.57279
wm-rh-precentral	13315.9	1770.97	13358.4	1897.94	42.4828	0.31853	419.711	3.14694	77.9384	0.58437	-603	1506	-4.52121	11.2918	37	309.586	2.32123	280.642	2.10422	52.114	0.39074	24	1506	0.17995	11.2918	0.97448	0.94952	0.01388	0.00258	0.90388	0.02473	0.00459	0.59001	0.22914
wm-rh-precuneus	9997.07	1505.27	9987.03	1443.33	-10.0345	-0.10042	472.412	4.72788	87.7247	0.87794	-1982	906	-19.8358	9.06721	83	266.448	2.6666	386.972	3.8728	71.8588	0.71916	17	1982	0.17014	19.8358	0.95039	0.94363	0.02686	0.00499	0.89327	0.04456	0.00828	0.90975	0.04108
wm-rh-rostralanteriorcingulate	1600.52	256.569	1583.1	263.197	-17.4138	-1.09396	86.3835	5.42675	16.041	1.00772	-178	96	-11.1822	6.03087	7	70.931	4.456	50.6486	3.18182	9.40521	0.59085	7	178	0.43975	11.1822	0.94444	0.89085	0.05343	0.00992	0.80319	0.08166	0.01516	0.28692	0.54223
wm-rh-rostralmiddlefrontal	12303.9	2826.76	12243.6	2804.57	-60.2759	-0.4911	266.924	2.17476	49.5665	0.40384	-532	615	-4.33446	5.0107	-133	225.931	1.84077	148.806	1.2124	27.6327	0.22514	7	615	0.05703	5.0107	0.99543	0.95096	0.01196	0.00222	0.90651	0.02146	0.00398	0.23411	0.63057
wm-rh-superiorfrontal	18016.3	2709.31	18132.1	2659.83	115.793	0.64065	328.148	1.81556	60.9356	0.33714	-560	597	-3.09833	3.30304	178	288.414	1.59572	188.188	1.04119	34.9457	0.19335	38	597	0.21024	3.30304	0.99186	0.95626	0.00853	0.00158	0.91618	0.01564	0.0029	0.06774	1.16914
wm-rh-superiorparietal	11084.9	1863.33	11108.3	1801.53	23.3793	0.21069	354.483	3.19453	65.8259	0.59321	-926	801	-8.34491	7.21844	-5	257.793	2.32317	239.57	2.15895	44.487	0.40091	5	926	0.04506	8.34491	0.98185	0.94534	0.01117	0.00207	0.89634	0.02	0.00371	0.72512	0.13959
wm-rh-superiortemporal	6358.21	1079.6	6335.62	996.945	-22.5862	-0.35586	333.469	5.25403	61.9236	0.97565	-1244	867	-19.6001	13.6602	4	206.103	3.2473	260.257	4.10054	48.3286	0.76145	4	1244	0.06302	19.6001	0.95001	0.92658	0.02034	0.00378	0.86321	0.03419	0.00635	0.71804	0.14385
wm-rh-supramarginal	8449.28	1355.43	8464.45	1366.12	15.1724	0.17941	381.687	4.51334	70.8775	0.83811	-1188	904	-14.0478	10.6895	-33	249.862	2.95455	285.066	3.37082	52.9354	0.62595	18	1188	0.21284	14.0478	0.96193	0.94413	0.01589	0.00295	0.89417	0.02833	0.00526	0.83205	0.07985
wm-rh-temporalpole	539.862	139.142	543.483	185.999	3.62069	0.66843	99.8468	18.4331	18.5411	3.42293	-276	282	-50.9533	52.061	-3	68.1034	12.5728	71.9669	13.2861	13.3639	2.46716	2	282	0.36923	52.061	0.82081	0.80428	0.09465	0.01758	0.67263	0.12343	0.02292	0.84658	0.07233
wm-rh-transversetemporal	490.448	112.362	495.862	138.93	5.41379	1.09779	63.4387	12.8638	11.7803	2.38875	-110	146	-22.3054	29.6053	-4	46.7931	9.48852	42.2732	8.572	7.84994	1.59178	0	146	0	29.6053	0.87717	0.83222	0.08047	0.01494	0.71265	0.10238	0.01901	0.64938	0.1875
Brain Mask Volume	1.58488e+06	150797	1.58471e+06	150668	-171.759	-0.01084	1147.29	0.07239	213.047	0.01344	-5767	1605	-0.36389	0.10127	0	344.793	0.02176	1106.21	0.0698	205.418	0.01296	0	5767	0	0.36389	0.99997	0.99865	0.00245	0.00046	0.99731	0.00488	0.00091	0.42692	0.36965
Brain Segmentation Volume	1.17418e+06	138778	1.17505e+06	141295	871.483	0.07419	12504.5	1.06456	2322.03	0.19768	-8747	63344	-0.74467	5.39275	-846	4833.62	0.41151	11530.5	0.98164	2141.15	0.18229	45	63344	0.00383	5.39275	0.99613	0.98933	0.00681	0.00127	0.97889	0.01322	0.00245	0.71026	0.14858
Brain Segmentation Volume Without Ventricles	1.15403e+06	139360	1.15491e+06	142018	878.517	0.0761	12500.1	1.08276	2321.22	0.20106	-8586	63335	-0.74372	5.48605	-681	4837	0.41898	11524.8	0.99827	2140.1	0.18537	30	63335	0.0026	5.48605	0.99617	0.98885	0.00703	0.00131	0.97795	0.01363	0.00253	0.70793	0.15001
Ventricles	17344	10519.6	17354.4	10503.2	10.3448	0.05963	153.63	0.88552	28.5284	0.16444	-581	306	-3.34886	1.76377	31	101.241	0.58355	114.443	0.65965	21.2516	0.12249	0	581	0	3.34886	0.9999	0.97632	0.01681	0.00312	0.95374	0.03097	0.00575	0.71962	0.1429
Left Medial-inferior Temporal Gyrus	29134.9	4485.61	29202.6	5059.12	67.6897	0.23206	1394.05	4.77926	258.868	0.88749	-3576	4113	-12.2597	14.1007	59	925.207	3.17191	1030.31	3.53224	191.324	0.65592	32	4113	0.10971	14.1007	0.95883	0.9365	0.0197	0.00366	0.88058	0.03414	0.00634	0.79563	0.09929
Right Medial-inferior Temporal Gyrus	30464	6277.53	30563.3	5890.58	99.3793	0.32569	1209.35	3.96332	224.571	0.73597	-2694	2778	-8.82883	9.10412	23	861.172	2.82225	839.439	2.75103	155.88	0.51085	13	2778	0.0426	9.10412	0.98081	0.94067	0.01622	0.00301	0.88799	0.02859	0.00531	0.66151	0.17947
Left Superior Temporal Gyrus	19262.8	3097.05	19302.5	2883.72	39.6897	0.20583	1225.43	6.35508	227.556	1.18011	-4865	2806	-25.2299	14.5519	126	704.586	3.65399	994.553	5.15776	184.684	0.95777	59	4865	0.30597	25.2299	0.91883	0.92935	0.0242	0.00449	0.86802	0.04092	0.0076	0.86279	0.06409
Right Superior Temporal Gyrus	17846.9	2510.34	17910.1	2506.18	63.1724	0.35334	587.852	3.28803	109.161	0.61057	-1657	1280	-9.26811	7.15943	-21	412.552	2.30753	416.444	2.3293	77.3316	0.43254	5	1657	0.02797	9.26811	0.97316	0.94361	0.01272	0.00236	0.89325	0.02253	0.00418	0.56741	0.2461
Left Temporal Lobe	80372.7	10814.7	80599	11184.1	226.379	0.28127	1684.61	2.09305	312.825	0.38867	-3957	5833	-4.91639	7.24724	246	1102.1	1.36931	1277.88	1.58771	237.297	0.29483	37	5833	0.04597	7.24724	0.98847	0.95634	0.01268	0.00236	0.91633	0.02311	0.00429	0.47528	0.32305
Right Temporal Lobe	79069	12159.4	79155.1	11652.9	86.069	0.10879	1364.53	1.72481	253.387	0.32029	-2996	2768	-3.78703	3.49884	147	1062.55	1.3431	836.823	1.05777	155.394	0.19642	123	2996	0.15548	3.78703	0.99364	0.95938	0.00912	0.00169	0.92194	0.01678	0.00312	0.73664	0.13275
v5.0.0
Struct	Mean1	sd1	Mean2	sd2	Mean diff	Mean diff %	sd Diff	sd Diff %	se Diff	se Diff %	min Diff	max Diff	min Diff %	max Diff %	median	Mean AbsDiff	Mean AbsDiff %	sd AbsDiff	sd AbsDiff %	se AbsDiff	se AbsDiff %	min AbsDiff	max AbsDiff	min AbsDiff %	max AbsDiff %	ICC(1,1)	SI	sd SI	se SI	OR	sd OR	se OR	p	-log10(p)
3rd-Ventricle	984.448	445.069	973.828	453.505	-10.6207	-1.0847	69.341	7.08184	12.8763	1.31506	-259	138	-26.4518	14.094	-1	40.8276	4.16975	56.556	5.7761	10.5022	1.07259	1	259	0.10213	26.4518	0.98822	0.96633	0.04166	0.00774	0.93486	0.07077	0.01314	0.41644	0.38044
4th-Ventricle	1928.21	746.538	1918.55	741.122	-9.65517	-0.50199	59.3147	3.08388	11.0145	0.57266	-183	82	-9.5145	4.26333	-4	39.7931	2.06892	44.4381	2.31042	8.25194	0.42903	2	183	0.10398	9.5145	0.99685	0.9746	0.01628	0.00302	0.95045	0.03019	0.00561	0.38817	0.41098
5th-Ventricle	6.31034	8.29847	4.82759	6.53599	-1.48276	-26.6254	4.98298	89.4776	0.92532	16.6156	-19	7	-341.176	125.697	0	3.06897	55.1084	4.1656	74.8002	0.77353	13.8901	0	19	0	341.176	0.76685	0.66873	0.40348	0.07492	0.50233	0.36894	0.06851	0.12028	0.9198
Brain-Stem	18813.9	2465.31	18803.4	2470.5	-10.4483	-0.05555	110.009	0.58488	20.4281	0.10861	-255	254	-1.35576	1.35044	10	84.5862	0.44972	69.3153	0.36853	12.8715	0.06843	2	255	0.01063	1.35576	0.99903	0.98378	0.0084	0.00156	0.96807	0.01611	0.00299	0.61303	0.21251
CC_Anterior	921.276	167.743	918.552	172.113	-2.72414	-0.29613	39.7338	4.3193	7.37839	0.80207	-108	163	-11.7402	17.719	0	18.6552	2.02793	35.0146	3.80629	6.50204	0.70681	0	163	0	17.719	0.97347	0.97318	0.02485	0.00461	0.94776	0.04568	0.00848	0.71475	0.14584
CC_Central	441.483	88.8195	439.724	90.4946	-1.75862	-0.39914	6.17978	1.40257	1.14756	0.26045	-19	9	-4.31227	2.04265	-1	4.31034	0.97828	4.7064	1.06817	0.87396	0.19835	0	19	0	4.31227	0.99751	0.97171	0.03931	0.0073	0.94497	0.06721	0.01248	0.13662	0.86448
CC_Mid_Anterior	480.517	120.727	477.966	120.88	-2.55172	-0.53245	30.3475	6.3324	5.63539	1.1759	-139	66	-29.0042	13.7718	0	13.1035	2.73421	27.384	5.71402	5.08508	1.06107	0	139	0	29.0042	0.9693	0.9633	0.04352	0.00808	0.92921	0.07641	0.01419	0.65418	0.1843
CC_Mid_Posterior	436.138	99.0908	437.172	100.533	1.03448	0.23691	7.97085	1.82543	1.48015	0.33897	-22	20	-5.0383	4.58027	1	5.24138	1.20035	6.01578	1.3777	1.1171	0.25583	0	22	0	5.0383	0.99687	0.96881	0.0414	0.00769	0.9395	0.07212	0.01339	0.49038	0.30947
CC_Posterior	892.793	173.017	893.828	172.69	1.03448	0.1158	10.6015	1.18676	1.96865	0.22038	-12	37	-1.34332	4.1419	0	6.48276	0.7257	8.36498	0.9364	1.55334	0.17389	0	37	0	4.1419	0.99817	0.97495	0.03608	0.0067	0.95112	0.06354	0.0118	0.60339	0.2194
CSF	1149.59	277.545	1162.17	270.898	12.5862	1.08889	45.7146	3.95496	8.48898	0.73442	-80	151	-6.92114	13.0637	12	33.4828	2.89673	33.0569	2.85989	6.13851	0.53107	1	151	0.08651	13.0637	0.98554	0.9521	0.02886	0.00536	0.90859	0.05111	0.00949	0.14934	0.82584
Left-Accumbens-area	534.138	125.128	536.69	122.147	2.55172	0.47659	45.4914	8.4965	8.44755	1.57776	-81	122	-15.1285	22.7861	-13	35.3103	6.59496	28.0154	5.23248	5.20234	0.97165	4	122	0.74709	22.7861	0.93437	0.91499	0.05247	0.00974	0.8433	0.08535	0.01585	0.76483	0.11643
Left-Amygdala	1685.69	312.225	1679.59	301.182	-6.10345	-0.36273	56.5656	3.36172	10.504	0.62426	-166	170	-9.86546	10.1032	-3	35.1379	2.08826	44.266	2.63075	8.21999	0.48852	0	170	0	10.1032	0.98338	0.94472	0.02398	0.00445	0.89523	0.0424	0.00787	0.56585	0.2473
Left-Caudate	4100.38	609.794	4102	597.613	1.62069	0.03952	48.317	1.17812	8.97224	0.21877	-129	112	-3.14543	2.73091	9	35.4828	0.86518	32.1443	0.78378	5.96905	0.14554	1	129	0.02438	3.14543	0.9969	0.97598	0.01082	0.00201	0.95309	0.02059	0.00382	0.85796	0.06653
Left-Cerebellum-Cortex	46890.3	9026.46	46949	9028.58	58.6897	0.12509	322.784	0.68795	59.9395	0.12775	-512	1155	-1.09123	2.46165	37	223.448	0.47624	236.737	0.50456	43.961	0.09369	12	1155	0.02558	2.46165	0.99936	0.97257	0.01773	0.00329	0.94661	0.0328	0.00609	0.33589	0.4738
Left-Cerebellum-White-Matter	14752.9	3021.14	14771.8	2869.81	18.8621	0.12777	707.293	4.79119	131.341	0.8897	-2540	2681	-17.2059	18.161	-10	248.379	1.68252	660.86	4.47665	122.719	0.83129	4	2681	0.0271	18.161	0.97215	0.97289	0.02026	0.00376	0.94722	0.03689	0.00685	0.88684	0.05216
Left-Hippocampus	4053.9	510.877	4052	518.892	-1.89655	-0.04679	57.9417	1.42962	10.7595	0.26547	-157	142	-3.87372	3.50362	-2	40.7931	1.0065	40.4655	0.99842	7.51425	0.1854	0	157	0	3.87372	0.99388	0.96097	0.01266	0.00235	0.92487	0.02337	0.00434	0.86135	0.06482
Left-Inf-Lat-Vent	366.483	313.315	360.966	318.551	-5.51724	-1.51688	30.5013	8.38584	5.66395	1.55721	-135	49	-37.116	13.4718	0	16.8276	4.62647	25.8568	7.10892	4.8015	1.32009	0	135	0	37.116	0.99535	0.93089	0.05761	0.0107	0.87071	0.09303	0.01728	0.33835	0.47064
Left-Lateral-Ventricle	8993.45	6653.67	8997.9	6653.79	4.44828	0.04945	111.337	1.23767	20.6747	0.22983	-489	180	-5.43595	2.00096	22	63.7586	0.70877	90.5872	1.00701	16.8216	0.187	1	489	0.01112	5.43595	0.99986	0.98441	0.01024	0.0019	0.9693	0.01961	0.00364	0.83121	0.08029
Left-Pallidum	1817.97	239.099	1828.1	230.784	10.1379	0.5561	62.0223	3.40215	11.5173	0.63176	-121	135	-6.63729	7.40524	14	47.5172	2.60649	40.1832	2.20419	7.46183	0.40931	2	135	0.10971	7.40524	0.96543	0.95171	0.01927	0.00358	0.90787	0.03521	0.00654	0.38622	0.41316
Left-Putamen	6117.14	776.419	6137	766.391	19.8621	0.32417	105.473	1.72143	19.5859	0.31966	-237	260	-3.86808	4.24346	12	75.3793	1.23027	75.1548	1.2266	13.9559	0.22777	3	260	0.04896	4.24346	0.99064	0.97243	0.0131	0.00243	0.94635	0.02461	0.00457	0.31922	0.49591
Left-Thalamus-Proper	7400.59	902.461	7420.93	935.499	20.3448	0.27453	112.071	1.51228	20.8111	0.28082	-159	287	-2.14553	3.87275	12	85.1724	1.14931	73.9947	0.99848	13.7405	0.18541	0	287	0	3.87275	0.99258	0.97693	0.00952	0.00177	0.95491	0.01815	0.00337	0.33665	0.47283
Left-VentralDC	4006.66	454.191	4018.62	442.566	11.9655	0.2982	87.4187	2.17859	16.2333	0.40455	-190	144	-4.73504	3.58866	18	68.931	1.71785	53.5643	1.33489	9.94665	0.24788	5	190	0.12461	4.73504	0.98129	0.9546	0.01872	0.00348	0.91314	0.03415	0.00634	0.46719	0.3305
Left-choroid-plexus	1605.97	344.54	1617.31	334.424	11.3448	0.70393	62.9049	3.90316	11.6811	0.7248	-114	161	-7.07355	9.98984	9	46.3793	2.87777	43.1562	2.67779	8.01391	0.49725	4	161	0.24819	9.98984	0.98287	0.9097	0.03686	0.00685	0.83435	0.06138	0.0114	0.33976	0.46883
Left-vessel	91.2069	56.5132	91.2069	55.633	0	0	8.47686	9.2941	1.57411	1.72587	-18	23	-19.7354	25.2174	-1	6.2069	6.80529	5.65293	6.19792	1.04972	1.15093	0	23	0	25.2174	0.98897	0.91493	0.05969	0.01108	0.84321	0.09618	0.01786	1	0
Optic-Chiasm	197.172	89.505	183.759	100.54	-13.4138	-7.04264	60.5944	31.8138	11.2521	5.90768	-155	111	-81.3796	58.2783	-7	41.1379	21.5986	45.8832	24.09	8.52029	4.4734	1	155	0.52503	81.3796	0.79472	0.83208	0.21465	0.03986	0.71245	0.25212	0.04682	0.24322	0.614
Right-Accumbens-area	634.828	111.979	637.655	106.239	2.82759	0.44442	32.0324	5.03463	5.94827	0.93491	-81	91	-12.731	14.3027	2	22.8276	3.58788	22.2407	3.49564	4.12999	0.64912	0	91	0	14.3027	0.95806	0.93377	0.0358	0.00665	0.87577	0.0628	0.01166	0.63822	0.19503
Right-Amygdala	1682.97	295.824	1681.86	307.43	-1.10345	-0.06559	57.3369	3.40802	10.6472	0.63285	-108	119	-6.41935	7.07317	4	45.5862	2.70957	33.7115	2.00376	6.26007	0.37209	1	119	0.05944	7.07317	0.98255	0.94193	0.02862	0.00532	0.89024	0.05005	0.00929	0.9182	0.03706
Right-Caudate	4218.83	605.812	4206.59	582.553	-12.2414	-0.29058	49.2564	1.16923	9.14668	0.21712	-126	101	-2.99095	2.39751	-8	37.6207	0.89303	33.3995	0.79283	6.20214	0.14722	0	126	0	2.99095	0.99647	0.97708	0.00993	0.00184	0.95518	0.01893	0.00352	0.19155	0.71771
Right-Cerebellum-Cortex	48483.4	8987.04	48588.8	8959.65	105.31	0.21697	303.225	0.62474	56.3075	0.11601	-230	1079	-0.47387	2.22309	28	206.828	0.42613	243.159	0.50099	45.1535	0.09303	5	1079	0.0103	2.22309	0.99938	0.97571	0.01463	0.00272	0.95258	0.02738	0.00508	0.07193	1.14307
Right-Cerebellum-White-Matter	14966.3	2648.7	14979.2	2635.23	12.8965	0.08613	302.619	2.02113	56.1949	0.37531	-597	1358	-3.98725	9.06983	-16	137.517	0.91845	268.633	1.79415	49.884	0.33317	5	1358	0.03339	9.06983	0.99365	0.97668	0.0131	0.00243	0.95442	0.02471	0.00459	0.82015	0.08611
Right-Hippocampus	4140.31	504.946	4149.21	504.291	8.89655	0.21465	66.0197	1.59285	12.2595	0.29578	-141	182	-3.40189	4.39109	7	46.5517	1.12315	46.8627	1.13065	8.70219	0.20996	3	182	0.07238	4.39109	0.99158	0.96224	0.0126	0.00234	0.92722	0.0234	0.00434	0.47405	0.32417
Right-Inf-Lat-Vent	329.552	288.3	333.517	285.893	3.96552	1.19611	17.9513	5.41461	3.33347	1.00547	-22	42	-6.63581	12.6684	-1	13.7586	4.14998	11.9363	3.60032	2.21652	0.66856	1	42	0.30163	12.6684	0.99802	0.94337	0.04371	0.00812	0.8928	0.07354	0.01366	0.24419	0.61227
Right-Lateral-Ventricle	7934.72	4326.75	7949.86	4314.98	15.1379	0.1906	86.2711	1.08622	16.0201	0.20171	-117	297	-1.47313	3.73947	9	60.5172	0.76196	62.345	0.78498	11.5772	0.14577	1	297	0.01259	3.73947	0.9998	0.9834	0.00997	0.00185	0.96735	0.01905	0.00354	0.35278	0.4525
Right-Pallidum	1571.17	189.562	1569.79	180.596	-1.37931	-0.08783	39.2814	2.50123	7.29438	0.46447	-76	96	-4.83928	6.11277	2	31.1034	1.9805	23.3029	1.4838	4.32724	0.27554	2	96	0.12735	6.11277	0.97823	0.95716	0.02058	0.00382	0.91784	0.03745	0.00695	0.85138	0.06987
Right-Putamen	5781.79	714.333	5787.1	725.086	5.31034	0.0918	53.967	0.93297	10.0214	0.17325	-127	133	-2.19554	2.29927	0	39.8621	0.68912	35.9987	0.62234	6.6848	0.11556	0	133	0	2.29927	0.99726	0.97314	0.01103	0.00205	0.94768	0.02093	0.00389	0.60036	0.22159
Right-Thalamus-Proper	7542.69	884.494	7548.55	895.675	5.86207	0.07769	84.4908	1.11973	15.6896	0.20793	-138	301	-1.82888	3.98907	-5	59.3793	0.78694	59.3503	0.78655	11.0211	0.14606	1	301	0.01325	3.98907	0.99563	0.97906	0.00865	0.00161	0.95898	0.01665	0.00309	0.71149	0.14783
Right-VentralDC	3924.52	439.878	3931.03	419.116	6.51724	0.16593	81.4803	2.07446	15.1305	0.38522	-127	226	-3.23338	5.75389	-8	59.2069	1.50739	55.2484	1.40661	10.2594	0.2612	6	226	0.15276	5.75389	0.98252	0.95683	0.02132	0.00396	0.91723	0.03883	0.00721	0.66996	0.17395
Right-choroid-plexus	1756.62	356.404	1734.69	378.35	-21.931	-1.25632	64.8041	3.71231	12.0338	0.68936	-189	87	-10.8269	4.9838	-15	50.9655	2.91956	44.8047	2.56664	8.32003	0.47661	0	189	0	10.8269	0.98322	0.91362	0.03226	0.00599	0.84097	0.05463	0.01014	0.07908	1.10191
Right-vessel	68.7586	45.0434	70.4828	48.4588	1.72414	2.47647	7.46371	10.7205	1.38598	1.99075	-14	29	-20.109	41.6543	2	5.10345	7.33036	5.64007	8.10113	1.04733	1.50434	0	29	0	41.6543	0.98703	0.91134	0.09536	0.01771	0.83712	0.14015	0.02602	0.22382	0.65011
ctx-lh-bankssts	2362.03	431.316	2352.59	427.711	-9.44828	-0.40081	102.214	4.33605	18.9807	0.80519	-235	307	-9.96899	13.0233	-17	75.1034	3.18598	68.5437	2.90771	12.7282	0.53995	3	307	0.12726	13.0233	0.97241	0.90645	0.0287	0.00533	0.82891	0.04637	0.00861	0.62252	0.20584
ctx-lh-caudalanteriorcingulate	2030	728.227	2018.66	732.303	-11.3448	-0.56042	86.7337	4.28457	16.106	0.79562	-183	162	-9.04004	8.00266	-9	71.7586	3.54481	48.1958	2.38083	8.94973	0.44211	4	183	0.1976	9.04004	0.99307	0.89978	0.02521	0.00468	0.81782	0.04091	0.0076	0.48701	0.31246
ctx-lh-caudalmiddlefrontal	7011.79	921.688	6994.45	930.299	-17.3448	-0.24767	213.101	3.04295	39.572	0.56506	-651	296	-9.29586	4.22669	36	160.103	2.28617	138.475	1.97733	25.7141	0.36718	2	651	0.02856	9.29586	0.97425	0.94277	0.01532	0.00284	0.89174	0.02686	0.00499	0.66452	0.17749
ctx-lh-cuneus	2986.83	445.8	2981.1	456.988	-5.72414	-0.19183	109.594	3.67276	20.3511	0.68202	-167	248	-5.59658	8.31109	-17	83.3103	2.79193	69.6871	2.33539	12.9406	0.43367	2	248	0.06702	8.31109	0.97145	0.88104	0.01832	0.0034	0.78738	0.02895	0.00538	0.78057	0.10759
ctx-lh-entorhinal	1735.07	390.728	1783.45	446.546	48.3793	2.74998	184.58	10.4919	34.2756	1.9483	-244	641	-13.8695	36.4358	32	133.345	7.5796	134.454	7.64265	24.9675	1.4192	3	641	0.17053	36.4358	0.90009	0.82923	0.04053	0.00753	0.70828	0.05654	0.0105	0.16912	0.77181
ctx-lh-frontalpole	756.793	149.377	780.034	195.718	23.2414	3.02459	77.966	10.1463	14.4779	1.88413	-100	257	-13.0138	33.4455	13	58	7.54802	56.1605	7.30863	10.4287	1.35718	2	257	0.26028	33.4455	0.89456	0.85972	0.03434	0.00638	0.75396	0.05261	0.00977	0.11965	0.92209
ctx-lh-fusiform	9375.55	1623.79	9359.86	1683.22	-15.6897	-0.16749	307.824	3.28601	57.1615	0.6102	-693	491	-7.39775	5.24141	34	235.897	2.51819	193.329	2.06378	35.9003	0.38323	28	693	0.2989	7.39775	0.98322	0.90985	0.02052	0.00381	0.8346	0.03361	0.00624	0.78573	0.10473
ctx-lh-inferiorparietal	12168.1	2128.28	12248.3	2087.18	80.2759	0.65756	304.928	2.49773	56.6238	0.46382	-610	997	-4.99664	8.16664	34	208.483	1.70773	233.748	1.91468	43.4059	0.35555	3	997	0.02457	8.16664	0.98917	0.94338	0.01149	0.00213	0.89283	0.02042	0.00379	0.16731	0.77648
ctx-lh-inferiortemporal	10092.6	2213.69	10013.7	2207.97	-78.8276	-0.78411	363.094	3.61175	67.4249	0.67068	-1014	708	-10.0864	7.04258	-28	284.207	2.82705	233.698	2.32462	43.3966	0.43167	23	1014	0.22878	10.0864	0.98634	0.91795	0.02392	0.00444	0.84834	0.03917	0.00727	0.25221	0.59823
ctx-lh-insula	7110.69	1045.63	7110.28	921.013	-0.41379	-0.00582	456.641	6.42208	84.796	1.19255	-1068	1097	-15.0201	15.4279	-19	284.759	4.00477	352.898	4.96307	65.5316	0.92162	14	1097	0.19689	15.4279	0.89611	0.90391	0.02367	0.00439	0.82466	0.03902	0.00725	0.99614	0.00168
ctx-lh-isthmuscingulate	2612.24	442.428	2594.17	456.348	-18.069	-0.6941	55.0862	2.11609	10.2293	0.39295	-145	66	-5.57005	2.53533	-15	46.3448	1.7803	33.8835	1.30161	6.29201	0.2417	0	145	0	5.57005	0.99194	0.89482	0.01863	0.00346	0.80967	0.03019	0.00561	0.08823	1.05438
ctx-lh-lateraloccipital	11767.9	1635.15	11771.1	1627.63	3.2069	0.02725	336.739	2.86113	62.5309	0.5313	-901	812	-7.6554	6.89921	50	232.241	1.97325	239.878	2.03814	44.5443	0.37847	3	901	0.02549	7.6554	0.97942	0.9236	0.02313	0.00429	0.85804	0.03873	0.00719	0.95946	0.01797
ctx-lh-lateralorbitofrontal	8264.1	1301.09	8269.24	1343.4	5.13793	0.06215	244.463	2.95722	45.3957	0.54914	-509	718	-6.15725	8.68548	-23	183.552	2.22038	157.782	1.90865	29.2994	0.35443	12	718	0.14516	8.68548	0.98349	0.9264	0.0107	0.00199	0.86289	0.01852	0.00344	0.91069	0.04063
ctx-lh-lingual	6268.76	959.439	6282.24	1047.45	13.4828	0.21485	202.8	3.23162	37.6591	0.6001	-402	539	-6.40586	8.58896	1	152.862	2.43585	130.824	2.08468	24.2934	0.38712	1	539	0.01593	8.58896	0.98022	0.89533	0.02202	0.00409	0.81049	0.03527	0.00655	0.72301	0.14085
ctx-lh-medialorbitofrontal	5109.55	546.621	5127.62	707.962	18.069	0.35301	444.049	8.67522	82.4578	1.61095	-1026	1056	-20.0446	20.6307	-10	311.241	6.08061	311.748	6.0905	57.8901	1.13098	10	1056	0.19537	20.6307	0.76065	0.87263	0.02799	0.0052	0.77405	0.04335	0.00805	0.82814	0.0819
ctx-lh-middletemporal	10202.7	1445.85	10241.1	1455.94	38.4138	0.3758	297.92	2.91452	55.3223	0.54121	-584	509	-5.71323	4.97951	112	254	2.48486	153.18	1.49855	28.4449	0.27827	0	584	0	5.71323	0.97929	0.92419	0.01179	0.00219	0.85907	0.0202	0.00375	0.49318	0.307
ctx-lh-paracentral	4042.79	684.092	4063.69	714.49	20.8966	0.51555	126.493	3.12078	23.4891	0.57951	-170	392	-4.19417	9.67127	3	96.1379	2.37188	82.9461	2.04641	15.4027	0.38001	2	392	0.04934	9.67127	0.98376	0.92532	0.01717	0.00319	0.86102	0.02931	0.00544	0.38125	0.4188
ctx-lh-parahippocampal	2107.03	322.08	2108.24	338.7	1.2069	0.05726	123.262	5.84834	22.8891	1.08601	-320	216	-15.1829	10.2484	9	87.6897	4.16057	85.0345	4.03459	15.7905	0.7492	0	320	0	15.1829	0.93276	0.89167	0.02441	0.00453	0.80451	0.03923	0.00728	0.95832	0.01849
ctx-lh-parsopercularis	5040.76	614.434	5040.17	608.882	-0.58621	-0.01163	147.563	2.92757	27.4018	0.54364	-307	358	-6.09071	7.10252	4	114.103	2.26375	91.0531	1.80644	16.9081	0.33545	4	358	0.07936	7.10252	0.97189	0.92773	0.01807	0.00336	0.86521	0.03037	0.00564	0.98308	0.00741
ctx-lh-parsorbitalis	2368.1	410.849	2342.14	389.15	-25.9655	-1.10251	115.658	4.91092	21.4772	0.91194	-358	203	-15.2009	8.61952	-15	82.4483	3.50081	83.8726	3.56129	15.5747	0.66131	7	358	0.29722	15.2009	0.95758	0.91522	0.02053	0.00381	0.84369	0.03454	0.00641	0.23678	0.62565
ctx-lh-parstriangularis	3710.38	645.249	3673.69	600.113	-36.6897	-0.99375	127.717	3.45925	23.7164	0.64237	-394	129	-10.6716	3.49401	4	99.5862	2.69733	86.2217	2.33534	16.011	0.43366	4	394	0.10834	10.6716	0.97799	0.92364	0.01255	0.00233	0.85811	0.0218	0.00405	0.13309	0.87586
ctx-lh-pericalcarine	2100.97	376.338	2136.14	392.843	35.1724	1.66021	87.3139	4.1214	16.2138	0.76532	-175	221	-8.26036	10.4316	44	72.8276	3.43761	58.4099	2.75707	10.8465	0.51197	1	221	0.0472	10.4316	0.971	0.87789	0.03676	0.00683	0.78236	0.05545	0.0103	0.0387	1.41224
ctx-lh-postcentral	10445.4	1695	10490	1680.58	44.5517	0.42561	139.16	1.32942	25.8414	0.24687	-251	330	-2.39785	3.15255	36	115.103	1.0996	87.7457	0.83825	16.294	0.15566	2	330	0.01911	3.15255	0.99637	0.94456	0.00896	0.00166	0.89494	0.01607	0.00298	0.09573	1.01897
ctx-lh-posteriorcingulate	3506.93	654.459	3533	639.427	26.069	0.7406	79.6573	2.26301	14.792	0.42023	-168	199	-4.77277	5.65346	29	64.2069	1.82408	52.7199	1.49774	9.78983	0.27812	5	199	0.14205	5.65346	0.99187	0.90306	0.01973	0.00366	0.82325	0.03225	0.00599	0.08892	1.05099
ctx-lh-precentral	14517.5	2153.55	14493.5	2098.47	-24	-0.16545	210.038	1.44799	39.003	0.26888	-531	628	-3.66068	4.32939	-47	148.345	1.02268	148.055	1.02068	27.4931	0.18954	11	628	0.07583	4.32939	0.99522	0.94743	0.01564	0.00291	0.90011	0.02752	0.00511	0.5433	0.26496
ctx-lh-precuneus	10419.8	1528.13	10396.1	1535.62	-23.7241	-0.22794	111.879	1.07494	20.7754	0.19961	-250	258	-2.40201	2.47888	-25	92.2069	0.88593	65.5294	0.62961	12.1685	0.11692	2	258	0.01922	2.47888	0.99731	0.93498	0.01078	0.002	0.8779	0.01895	0.00352	0.26315	0.57979
ctx-lh-rostralanteriorcingulate	2786.07	730.506	2823.38	742.713	37.3103	1.33027	184.86	6.59104	34.3277	1.22392	-253	607	-9.02049	21.6421	-4	130.552	4.65471	134.025	4.77854	24.8878	0.88735	4	607	0.14262	21.6421	0.96832	0.88904	0.02195	0.00408	0.80025	0.0353	0.00656	0.28636	0.5431
ctx-lh-rostralmiddlefrontal	17096.5	3511.4	17115	3654.72	18.5517	0.10845	359.782	2.10328	66.8099	0.39057	-760	913	-4.44295	5.33738	72	265.655	1.55302	238.131	1.39211	44.2199	0.25851	14	913	0.08184	5.33738	0.99512	0.94545	0.00949	0.00176	0.89654	0.01688	0.00313	0.7833	0.10607
ctx-lh-superiorfrontal	23873.7	2847.04	23772.7	2769.44	-100.931	-0.42367	407.021	1.70851	75.5819	0.31726	-1616	455	-6.78331	1.9099	-62	301	1.26347	287.019	1.20479	53.2982	0.22372	2	1616	0.0084	6.78331	0.98922	0.95288	0.00717	0.00133	0.91	0.01305	0.00242	0.19251	0.71556
ctx-lh-superiorparietal	14107.8	2079.84	14067.9	2030.6	-39.8965	-0.2832	204.998	1.45514	38.0671	0.27021	-641	358	-4.55003	2.5412	-43	164.379	1.16682	125.248	0.88905	23.258	0.16509	10	641	0.07098	4.55003	0.99501	0.94882	0.01043	0.00194	0.90263	0.0186	0.00345	0.30357	0.51773
ctx-lh-superiortemporal	12233.3	1507.35	12189.9	1571.02	-43.4828	-0.35608	200.254	1.63987	37.1862	0.30452	-397	304	-3.25101	2.48944	-53	170.586	1.39692	109.183	0.8941	20.2749	0.16603	31	397	0.25386	3.25101	0.99143	0.93746	0.0106	0.00197	0.88228	0.01854	0.00344	0.25213	0.59837
ctx-lh-supramarginal	11160.5	1745.65	11104.2	1719.72	-56.2759	-0.50552	249.439	2.24067	46.3196	0.41608	-754	271	-6.77306	2.43435	3	187.724	1.68629	170.296	1.52974	31.6232	0.28407	1	754	0.00898	6.77306	0.98947	0.94518	0.01012	0.00188	0.89605	0.01808	0.00336	0.23453	0.6298
ctx-lh-temporalpole	2483.34	326.845	2467.45	327.888	-15.8965	-0.64218	136.96	5.53286	25.4329	1.02743	-234	446	-9.45303	18.0173	-44	103.069	4.16374	89.5389	3.61715	16.627	0.67169	7	446	0.28278	18.0173	0.91424	0.88611	0.03798	0.00705	0.79552	0.0576	0.0107	0.53701	0.27002
ctx-lh-transversetemporal	1228.83	246.221	1209.9	245.282	-18.931	-1.55254	88.2087	7.23401	16.38	1.34332	-339	119	-27.8014	9.7592	3	58.6552	4.81032	67.7397	5.55534	12.5789	1.0316	3	339	0.24603	27.8014	0.93486	0.88065	0.04699	0.00873	0.78675	0.0694	0.01289	0.25755	0.58913
ctx-rh-bankssts	2305.14	346.808	2313.97	366.742	8.82759	0.38222	101.526	4.3959	18.8528	0.8163	-199	205	-8.61639	8.87618	-14	78.6897	3.40714	63.0471	2.72984	11.7075	0.50692	0	205	0	8.87618	0.96061	0.90512	0.02528	0.00469	0.82668	0.04079	0.00758	0.64324	0.19163
ctx-rh-caudalanteriorcingulate	2202.34	556.542	2184.93	506.049	-17.4138	-0.79383	153.36	6.99114	28.4783	1.29822	-710	224	-32.3663	10.2113	8	79.8276	3.63905	131.276	5.9844	24.3774	1.11128	1	710	0.04559	32.3663	0.95931	0.90303	0.02785	0.00517	0.82321	0.0449	0.00834	0.54582	0.26295
ctx-rh-caudalmiddlefrontal	6766.97	1305.12	6723.66	1256.2	-43.3103	-0.64208	190.324	2.82157	35.3422	0.52395	-683	261	-10.1256	3.86935	-25	134.276	1.99066	139.614	2.06979	25.9256	0.38435	3	683	0.04448	10.1256	0.98877	0.94067	0.01458	0.00271	0.88799	0.02553	0.00474	0.23061	0.63712
ctx-rh-cuneus	3250.79	482.706	3292.66	478.997	41.8621	1.27951	187.446	5.72928	34.8079	1.0639	-396	704	-12.1037	21.5177	30	116	3.54553	151.705	4.63686	28.171	0.86104	3	704	0.09169	21.5177	0.9229	0.86764	0.02893	0.00537	0.76623	0.04454	0.00827	0.23918	0.62128
ctx-rh-entorhinal	1653.97	385.244	1673.21	370.448	19.2414	1.15662	149.5	8.98663	27.7615	1.66877	-211	371	-12.6834	22.3012	63	127.379	7.65691	76.9988	4.62848	14.2983	0.85949	12	371	0.72133	22.3012	0.9231	0.82207	0.05206	0.00967	0.6979	0.07252	0.01347	0.49396	0.30631
ctx-rh-frontalpole	997.69	200.596	1038.21	208.831	40.5172	3.98028	82.7417	8.12828	15.3648	1.50938	-96	312	-9.43073	30.6499	31	65.8276	6.46669	63.7058	6.25826	11.8299	1.16213	4	312	0.39295	30.6499	0.90241	0.88386	0.04196	0.00779	0.79189	0.06498	0.01207	0.01349	1.86988
ctx-rh-fusiform	9270.55	1477.06	9177.86	1595.07	-92.6897	-1.00485	351.825	3.81415	65.3323	0.70827	-1032	1050	-11.188	11.3831	-101	245.448	2.66091	265.109	2.87406	49.2295	0.5337	20	1050	0.21682	11.3831	0.97291	0.90249	0.01608	0.00299	0.8223	0.02645	0.00491	0.16701	0.77726
ctx-rh-inferiorparietal	14832.6	2604.46	14860	2453.49	27.4138	0.18465	360.689	2.42949	66.9783	0.45114	-923	863	-6.21704	5.8129	42	278.517	1.87601	224.795	1.51415	41.7434	0.28117	18	923	0.12124	6.21704	0.99013	0.94595	0.01009	0.00187	0.89745	0.01804	0.00335	0.68544	0.16403
ctx-rh-inferiortemporal	9659.55	2375.11	9751.24	2241.55	91.6897	0.94473	322.928	3.3273	59.9662	0.61786	-411	854	-4.23476	8.79923	55	257.414	2.65227	210.621	2.17015	39.1114	0.40299	22	854	0.22668	8.79923	0.98977	0.91486	0.01688	0.00313	0.84308	0.02832	0.00526	0.13748	0.86176
ctx-rh-insula	6755.66	1071.63	6796.55	1093.58	40.8965	0.60354	273.016	4.02911	50.6979	0.74819	-495	861	-7.30508	12.7064	6	196.828	2.90473	190.12	2.80574	35.3043	0.52101	5	861	0.07379	12.7064	0.96858	0.90285	0.01516	0.00281	0.8229	0.02522	0.00468	0.42665	0.36992
ctx-rh-isthmuscingulate	2505.24	458.629	2521.72	446.096	16.4828	0.65577	102.694	4.08572	19.0698	0.7587	-161	237	-6.40545	9.42915	6	83.3793	3.31728	60.2248	2.39607	11.1835	0.44494	3	237	0.11936	9.42915	0.97446	0.88086	0.02537	0.00471	0.78709	0.04019	0.00746	0.39475	0.40368
ctx-rh-lateraloccipital	11464.5	1774.51	11395.9	1699.61	-68.5517	-0.59974	474.719	4.1532	88.1531	0.77123	-1515	799	-13.2544	6.99025	52	334.621	2.92751	338.017	2.95722	62.7681	0.54914	40	1515	0.34995	13.2544	0.96317	0.91613	0.02042	0.00379	0.84524	0.03432	0.00637	0.4433	0.3533
ctx-rh-lateralorbitofrontal	7969.59	1241.55	7930.03	1262.81	-39.5517	-0.49752	243.095	3.05788	45.1417	0.56783	-608	359	-7.64798	4.51583	-40	182.655	2.2976	161.744	2.03457	30.0351	0.37781	10	608	0.12579	7.64798	0.98131	0.91859	0.01554	0.00289	0.84944	0.02631	0.00489	0.38839	0.41073
ctx-rh-lingual	6447.55	774.566	6507.55	748.774	60	0.92628	221.166	3.41434	41.0695	0.63403	-303	504	-4.67769	7.78072	69	187.517	2.89488	127.375	1.9664	23.6529	0.36515	33	504	0.50945	7.78072	0.95624	0.88392	0.02292	0.00426	0.79199	0.03622	0.00673	0.15516	0.80921
ctx-rh-medialorbitofrontal	5254.69	853.397	5209.59	875.374	-45.1035	-0.86205	197.796	3.78041	36.7298	0.702	-370	511	-7.07168	9.76656	-78	161.103	3.07911	119.788	2.28946	22.244	0.42514	6	511	0.11468	9.76656	0.97337	0.90199	0.01549	0.00288	0.82147	0.02542	0.00472	0.22968	0.63888
ctx-rh-middletemporal	11117.6	1470.45	11127.8	1436.77	10.1724	0.09146	271.387	2.43995	50.3954	0.45309	-602	647	-5.41237	5.81695	-37	215.138	1.93423	160.689	1.4447	29.8392	0.26827	8	647	0.07193	5.81695	0.98315	0.92906	0.01369	0.00254	0.86751	0.02363	0.00439	0.84149	0.07495
ctx-rh-paracentral	4561.14	788.334	4569.9	801.905	8.75862	0.19184	183.729	4.02428	34.1176	0.74729	-719	235	-15.7485	5.14728	47	125.172	2.74169	132.696	2.90648	24.641	0.53972	3	719	0.06571	15.7485	0.97415	0.91991	0.0193	0.00358	0.8517	0.03257	0.00605	0.79927	0.0973
ctx-rh-parahippocampal	1983.9	322.222	1970.69	316.835	-13.2069	-0.66793	124.119	6.27723	23.0484	1.16565	-281	232	-14.2113	11.7332	-25	99.8966	5.05219	72.4605	3.66463	13.4556	0.6805	3	281	0.15172	14.2113	0.92624	0.86941	0.02726	0.00506	0.76898	0.04192	0.00779	0.57121	0.2432
ctx-rh-parsopercularis	4117.14	764.794	4128.76	749.374	11.6207	0.28185	149.285	3.62084	27.7216	0.67237	-232	437	-5.62704	10.5992	11	115.276	2.79596	93.0744	2.25747	17.2835	0.4192	4	437	0.09702	10.5992	0.98111	0.91792	0.01404	0.00261	0.84828	0.02387	0.00443	0.67827	0.16859
ctx-rh-parsorbitalis	2785.86	371.468	2827.69	403.607	41.8276	1.49024	123.646	4.40528	22.9606	0.81804	-169	402	-6.02114	14.3225	26	94.7241	3.37484	88.3592	3.14807	16.4079	0.58458	4	402	0.14251	14.3225	0.94524	0.91632	0.0277	0.00514	0.84556	0.04436	0.00824	0.0792	1.10128
ctx-rh-parstriangularis	4479.07	880.991	4434.48	825.566	-44.5862	-1.00041	149.713	3.35923	27.8011	0.62379	-467	209	-10.4784	4.68949	-50	121	2.71497	96.4839	2.16488	17.9166	0.40201	16	467	0.359	10.4784	0.9838	0.9245	0.01093	0.00203	0.8596	0.01878	0.00349	0.11999	0.92086
ctx-rh-pericalcarine	2365.76	408.144	2406.31	408.149	40.5517	1.69954	105	4.40062	19.498	0.81717	-196	242	-8.21447	10.1424	55	92.6207	3.88178	61.9939	2.5982	11.512	0.48247	5	242	0.20955	10.1424	0.96318	0.8645	0.03366	0.00625	0.76134	0.05101	0.00947	0.04682	1.32959
ctx-rh-postcentral	9754.66	1370.17	9695.03	1398.97	-59.6207	-0.61308	191.372	1.96786	35.5369	0.36542	-735	247	-7.55796	2.53989	-56	136.448	1.40309	144.989	1.49091	26.9237	0.27685	14	735	0.14396	7.55796	0.98985	0.93518	0.01435	0.00267	0.87825	0.02465	0.00458	0.10453	0.98075
ctx-rh-posteriorcingulate	3384.03	572.41	3368.07	583.439	-15.9655	-0.4729	98.7701	2.92561	18.3411	0.54327	-231	165	-6.84231	4.88737	-4	79.6207	2.3584	58.7679	1.74073	10.9129	0.32325	4	231	0.11848	6.84231	0.98552	0.89313	0.02381	0.00442	0.80689	0.03783	0.00703	0.39144	0.40733
ctx-rh-precentral	13949	1844.2	13932.2	1791.82	-16.7931	-0.12046	206.361	1.48028	38.3202	0.27488	-341	547	-2.44609	3.92379	-52	162.103	1.16282	125.143	0.89769	23.2385	0.1667	16	547	0.11477	3.92379	0.99374	0.9463	0.01114	0.00207	0.89807	0.01978	0.00367	0.66458	0.17745
ctx-rh-precuneus	11060	1786.63	11136.4	1772.51	76.4138	0.68853	166.735	1.50237	30.9619	0.27898	-239	426	-2.15351	3.83847	69	143.724	1.29503	111.597	1.00554	20.723	0.18672	3	426	0.02703	3.83847	0.99484	0.92938	0.01109	0.00206	0.86807	0.01948	0.00362	0.01996	1.69981
ctx-rh-rostralanteriorcingulate	2332.52	522.543	2340.52	542.672	8	0.34239	139.245	5.95952	25.8572	1.10665	-296	235	-12.6684	10.0577	60	117.793	5.0414	71.3074	3.05187	13.2415	0.56672	24	296	1.02717	12.6684	0.96688	0.8737	0.01974	0.00367	0.77572	0.03071	0.0057	0.75931	0.11958
ctx-rh-rostralmiddlefrontal	17225.1	3205.05	17168.9	3086.09	-56.2414	-0.32704	451.101	2.62314	83.7673	0.4871	-2097	524	-12.194	3.04705	15	229.828	1.33644	389.95	2.26755	72.4119	0.42107	2	2097	0.01163	12.194	0.98991	0.94438	0.00935	0.00174	0.89461	0.01663	0.00309	0.50747	0.29459
ctx-rh-superiorfrontal	23391.4	3360.82	23510.2	3532.28	118.724	0.50627	453.256	1.9328	84.1676	0.35891	-523	1605	-2.2302	6.84411	39	302.862	1.29148	353.608	1.50787	65.6634	0.28	12	1605	0.05117	6.84411	0.99106	0.95252	0.00912	0.00169	0.90935	0.01646	0.00306	0.16939	0.77112
ctx-rh-superiorparietal	14101.3	2515.3	14097.8	2370.68	-3.44828	-0.02446	348.59	2.47235	64.7316	0.4591	-507	1307	-3.59586	9.2698	-65	199.655	1.41604	283.269	2.00907	52.6018	0.37307	10	1307	0.07092	9.2698	0.99018	0.94433	0.01392	0.00259	0.89453	0.02432	0.00452	0.95789	0.01868
ctx-rh-superiortemporal	11955.1	1528.06	11962.7	1497.46	7.58621	0.06344	210.537	1.7605	39.0958	0.32692	-411	414	-3.43676	3.46185	-28	174.759	1.46132	112.934	0.94435	20.9714	0.17536	28	414	0.23413	3.46185	0.99064	0.94299	0.00976	0.00181	0.89214	0.01731	0.00321	0.84754	0.07184
ctx-rh-supramarginal	10454	1748.39	10418.8	1716.04	-35.1724	-0.33702	250.502	2.40027	46.517	0.44572	-581	444	-5.56705	4.25433	-65	213.103	2.04192	130.374	1.24922	24.2098	0.23197	14	581	0.13415	5.56705	0.9897	0.94369	0.01013	0.00188	0.89339	0.01803	0.00335	0.45589	0.34114
ctx-rh-temporalpole	2160.72	256.758	2156.24	264.86	-4.48276	-0.20768	164.328	7.61313	30.515	1.41372	-281	471	-13.0184	21.8209	-9	118.966	5.51153	111.204	5.15195	20.6501	0.95669	1	471	0.04633	21.8209	0.8076	0.85472	0.04865	0.00903	0.7463	0.07147	0.01327	0.88426	0.05342
ctx-rh-transversetemporal	940.034	228.873	947.172	210.455	7.13793	0.75645	80.0258	8.48087	14.8604	1.57486	-177	157	-18.7579	16.6383	9	57.8965	6.13569	54.6367	5.79022	10.1458	1.07522	0	177	0	18.7579	0.93546	0.86349	0.04332	0.00805	0.75977	0.06592	0.01224	0.63472	0.19742
wm-lh-bankssts	2849.76	613.767	2845.52	626.601	-4.24138	-0.14894	97.3839	3.41981	18.0837	0.63504	-198	158	-6.95313	5.54846	7	77.3448	2.7161	57.5011	2.01926	10.6777	0.37497	6	198	0.2107	6.95313	0.98807	0.9383	0.02463	0.00457	0.88377	0.04175	0.00775	0.81627	0.08817
wm-lh-caudalanteriorcingulate	3150.97	707.107	3108.79	672.773	-42.1724	-1.34741	131.737	4.209	24.4629	0.78159	-366	202	-11.6937	6.45392	-24	105.069	3.35697	88.1071	2.81503	16.3611	0.52274	2	366	0.0639	11.6937	0.98056	0.93331	0.0187	0.00347	0.87495	0.03256	0.00605	0.09575	1.01888
wm-lh-caudalmiddlefrontal	6865.55	938.41	6911.52	856.477	45.9655	0.66728	233.008	3.38255	43.2685	0.62812	-433	486	-6.28581	7.0552	105	189.069	2.74469	139.489	2.02495	25.9025	0.37602	2	486	0.02903	7.0552	0.96622	0.94325	0.01936	0.0036	0.89259	0.03377	0.00627	0.29716	0.52701
wm-lh-cuneus	2341.52	338.104	2330.97	289.638	-10.5517	-0.45165	125.818	5.38549	23.3638	1.00006	-449	211	-19.2189	9.0316	-6	86.8966	3.7195	90.1377	3.85824	16.7382	0.71646	6	449	0.25682	19.2189	0.92224	0.9194	0.0184	0.00342	0.85082	0.03091	0.00574	0.65502	0.18375
wm-lh-entorhinal	832.138	220.036	841	211.982	8.86207	1.05934	72.2593	8.63758	13.4182	1.60396	-119	151	-14.2248	18.0499	6	61.4828	7.3494	37.2507	4.4528	6.91728	0.82686	6	151	0.71722	18.0499	0.94513	0.85328	0.05696	0.01058	0.7441	0.08172	0.01518	0.51436	0.28873
wm-lh-frontalpole	187.966	42.8506	189.241	51.566	1.27586	0.67648	28.5643	15.1452	5.30426	2.81239	-41	88	-21.7387	46.6587	-4	21.3448	11.3173	18.5939	9.85874	3.4528	1.83072	0	88	0	46.6587	0.82387	0.8275	0.04746	0.00881	0.70575	0.0675	0.01253	0.81167	0.09062
wm-lh-fusiform	6614.55	1118.48	6613.41	1168.09	-1.13793	-0.0172	185.169	2.79967	34.3851	0.51988	-383	424	-5.79076	6.41066	6	143.138	2.16417	114.319	1.72844	21.2285	0.32096	6	424	0.09072	6.41066	0.98734	0.92958	0.01884	0.0035	0.86843	0.03238	0.00601	0.97383	0.01151
wm-lh-inferiorparietal	9362.14	1421.04	9293.76	1309.13	-68.3793	-0.73306	407.869	4.37254	75.7393	0.81196	-1717	571	-18.4071	6.12139	-7	261.414	2.80248	316.894	3.39725	58.8457	0.63085	7	1717	0.07504	18.4071	0.95572	0.94855	0.01683	0.00312	0.90214	0.02958	0.00549	0.37432	0.42676
wm-lh-inferiortemporal	5818.24	1041.88	5820.45	1095.01	2.2069	0.03792	212.455	3.65085	39.452	0.67795	-480	434	-8.24835	7.45788	-11	170.345	2.92722	122.836	2.11082	22.8101	0.39197	6	480	0.1031	8.24835	0.98092	0.93168	0.01652	0.00307	0.8721	0.02858	0.00531	0.95579	0.01964
wm-lh-insula	9532.14	1295.74	9511.62	1208.62	-20.5172	-0.21547	613.138	6.43926	113.857	1.19574	-1371	1450	-14.3984	15.2281	61	408.724	4.29247	450.947	4.7359	83.7387	0.87943	5	1450	0.05251	15.2281	0.88403	0.91356	0.02082	0.00387	0.84087	0.03515	0.00653	0.85829	0.06636
wm-lh-isthmuscingulate	3765.07	623.119	3745.79	600.577	-19.2759	-0.51328	97.7376	2.60257	18.1494	0.48328	-261	236	-6.94993	6.28423	-14	72.0345	1.91814	67.5513	1.79876	12.544	0.33402	0	261	0	6.94993	0.98719	0.93811	0.0179	0.00332	0.88343	0.03131	0.00581	0.29728	0.52683
wm-lh-lateraloccipital	8564.1	1314.88	8566.38	1341.35	2.27586	0.02657	224.814	2.62473	41.7469	0.4874	-432	669	-5.04364	7.81064	-12	162.345	1.89539	152.478	1.7802	28.3145	0.33057	9	669	0.10508	7.81064	0.98616	0.93854	0.0228	0.00423	0.88419	0.03916	0.00727	0.95691	0.01913
wm-lh-lateralorbitofrontal	6872.28	849.196	6892.41	916.22	20.1379	0.2926	197.101	2.86387	36.6008	0.53181	-283	735	-4.11197	10.6795	1	134.897	1.96004	142.905	2.07641	26.5369	0.38558	1	735	0.01453	10.6795	0.9757	0.94649	0.01337	0.00248	0.89842	0.0239	0.00444	0.58654	0.2317
wm-lh-lingual	5174.52	723.544	5171.55	733.176	-2.96552	-0.05733	216.914	4.19317	40.2799	0.77865	-752	372	-14.5369	7.19114	-20	154.828	2.99297	149.108	2.88241	27.6886	0.53525	3	752	0.05799	14.5369	0.95714	0.91983	0.02235	0.00415	0.85156	0.03772	0.007	0.94183	0.02603
wm-lh-medialorbitofrontal	3530.93	696.596	3434.1	566.899	-96.8276	-2.78039	543.128	15.5958	100.856	2.89608	-1371	1099	-39.3681	31.5576	-17	377.448	10.8384	396.413	11.3829	73.612	2.11376	7	1371	0.201	39.3681	0.6351	0.85802	0.04652	0.00864	0.75134	0.07086	0.01316	0.34525	0.46187
wm-lh-middletemporal	5015.41	806.7	5029.28	817.578	13.8621	0.27601	188.043	3.74413	34.9187	0.69527	-455	329	-9.05951	6.55073	8	148.345	2.9537	112.992	2.24978	20.982	0.41777	3	455	0.05973	9.05951	0.97396	0.92299	0.01454	0.0027	0.857	0.02461	0.00457	0.69439	0.1584
wm-lh-paracentral	4187.76	700.322	4185.28	757.274	-2.48276	-0.0593	129.237	3.08699	23.9988	0.57324	-281	289	-6.71202	6.90311	-17	98.7586	2.35897	81.2842	1.94157	15.0941	0.36054	8	289	0.19109	6.90311	0.98483	0.94274	0.01202	0.00223	0.89168	0.02132	0.00396	0.91834	0.037
wm-lh-parahippocampal	1463.17	241.749	1456.1	247.081	-7.06897	-0.4843	65.7245	4.50279	12.2047	0.83615	-140	183	-9.59142	12.5374	-12	49.6897	3.40425	42.5937	2.9181	7.90945	0.54188	9	183	0.61659	12.5374	0.96466	0.91395	0.0252	0.00468	0.84153	0.0417	0.00774	0.56709	0.24635
wm-lh-parsopercularis	3746.76	618.014	3689.34	559.63	-57.4138	-1.54419	128.614	3.45917	23.883	0.64235	-337	152	-9.06389	4.08816	-52	108.448	2.9168	88.1734	2.37149	16.3734	0.44038	0	337	0	9.06389	0.97234	0.93455	0.0117	0.00217	0.87713	0.02038	0.00378	0.02308	1.63672
wm-lh-parsorbitalis	924.414	195.037	915.621	191.174	-8.7931	-0.95575	50.7349	5.51456	9.42123	1.02403	-187	76	-20.3257	8.26071	-15	36.6552	3.98418	35.532	3.8621	6.59812	0.71717	1	187	0.10869	20.3257	0.96564	0.90834	0.02948	0.00547	0.83207	0.04787	0.00889	0.35863	0.44535
wm-lh-parstriangularis	3015.83	563.319	3003.03	543.201	-12.7931	-0.4251	152.611	5.0711	28.3392	0.94168	-558	316	-18.5417	10.5003	-11	100.172	3.32862	114.31	3.7984	21.2269	0.70535	0	558	0	18.5417	0.96299	0.92462	0.02258	0.00419	0.85981	0.03824	0.0071	0.65516	0.18365
wm-lh-pericalcarine	3130.79	628.017	3193.66	647.674	62.8621	1.98791	147.046	4.65007	27.3057	0.8635	-163	455	-5.1546	14.3886	59	117.138	3.70429	107.256	3.39179	19.9169	0.62984	1	455	0.03162	14.3886	0.96955	0.91583	0.04136	0.00768	0.84473	0.0624	0.01159	0.02897	1.538
wm-lh-postcentral	6978.07	1083.25	6985.86	1052.97	7.7931	0.11162	166.221	2.38071	30.8664	0.44209	-366	364	-5.24208	5.21343	7	130.759	1.87281	99.9188	1.4311	18.5544	0.26575	7	366	0.10026	5.24208	0.98828	0.93904	0.00993	0.00184	0.88508	0.01764	0.00328	0.80252	0.09555
wm-lh-posteriorcingulate	4639.83	659.842	4679.52	670.113	39.6897	0.85177	142.345	3.05482	26.4327	0.56727	-227	493	-4.87159	10.5801	17	107.621	2.30962	99.487	2.13507	18.4743	0.39647	1	493	0.02146	10.5801	0.97611	0.94471	0.01458	0.00271	0.89521	0.02602	0.00483	0.14441	0.8404
wm-lh-precentral	13284.8	1912.21	13288.1	1990.76	3.27586	0.02466	227.71	1.71385	42.2847	0.31825	-330	800	-2.48374	6.02118	-63	151.828	1.14273	167.296	1.25915	31.0662	0.23382	3	800	0.02258	6.02118	0.99343	0.95334	0.01206	0.00224	0.91083	0.02169	0.00403	0.9388	0.02743
wm-lh-precuneus	9512.38	1362.52	9448.76	1379.62	-63.6207	-0.67106	155.239	1.63744	28.8271	0.30407	-644	96	-6.79284	1.0126	-29	102.103	1.07698	132.264	1.39511	24.5608	0.25907	8	644	0.08438	6.79284	0.99274	0.95581	0.01153	0.00214	0.91536	0.02099	0.0039	0.03568	1.44754
wm-lh-rostralanteriorcingulate	2901.79	565.674	2998.34	626.491	96.5517	3.27286	191.683	6.49757	35.5946	1.20657	-104	666	-3.52534	22.5757	18	136	4.61006	165.048	5.59472	30.6486	1.03891	3	666	0.10169	22.5757	0.93748	0.92251	0.02661	0.00494	0.85617	0.0447	0.0083	0.01129	1.94741
wm-lh-rostralmiddlefrontal	12715.9	2415.61	12687.9	2454.58	-27.9655	-0.22017	306.006	2.40914	56.8239	0.44737	-714	641	-5.62122	5.0465	-50	235	1.85012	193.009	1.51953	35.8409	0.28217	7	714	0.05511	5.62122	0.99231	0.95808	0.00801	0.00149	0.91954	0.01472	0.00273	0.62645	0.20311
wm-lh-superiorfrontal	17785.7	2524.96	17752.7	2594.31	-33.069	-0.1861	325.482	1.83172	60.4404	0.34014	-744	576	-4.18702	3.24157	-36	257.621	1.44982	195.786	1.10183	36.3566	0.2046	36	744	0.2026	4.18702	0.99211	0.95968	0.00791	0.00147	0.92249	0.01456	0.0027	0.58862	0.23016
wm-lh-superiorparietal	11616.5	1456.49	11634.8	1430.31	18.2414	0.15691	187.897	1.61623	34.8917	0.30013	-328	516	-2.82135	4.43847	8	146.517	1.26029	115.828	0.99631	21.5086	0.18501	0	516	0	4.43847	0.99174	0.95484	0.00679	0.00126	0.91359	0.01238	0.0023	0.60523	0.21808
wm-lh-superiortemporal	7215.93	1107.28	7253.59	1163.94	37.6552	0.52048	193.101	2.66908	35.858	0.49564	-261	634	-3.60758	8.76325	26	150.414	2.07904	123.792	1.71107	22.9875	0.31774	5	634	0.06911	8.76325	0.9855	0.93687	0.01077	0.002	0.88123	0.01891	0.00351	0.30264	0.51907
wm-lh-supramarginal	8279.93	1288.12	8246.34	1224.16	-33.5862	-0.40646	205.857	2.49127	38.2268	0.46262	-636	336	-7.69683	4.06625	-29	156.483	1.89374	134.849	1.63193	25.0408	0.30304	6	636	0.07261	7.69683	0.98669	0.95091	0.0091	0.00169	0.90641	0.01649	0.00306	0.38709	0.41218
wm-lh-temporalpole	613.034	97.836	589.172	92.4504	-23.8621	-3.96971	58.8398	9.78863	10.9263	1.8177	-136	139	-22.6251	23.1241	-34	50.5517	8.40982	37.4848	6.236	6.96076	1.158	3	139	0.49908	23.1241	0.78673	0.84454	0.04936	0.00917	0.73091	0.07166	0.01331	0.03751	1.42591
wm-lh-transversetemporal	753.517	153.617	742.586	143.162	-10.931	-1.46127	57.0519	7.62674	10.5943	1.41625	-194	78	-25.934	10.4271	-5	42.8621	5.72983	38.4176	5.13568	7.13396	0.95367	2	194	0.26736	25.934	0.92602	0.86404	0.03775	0.00701	0.76062	0.05721	0.01062	0.311	0.50724
wm-rh-bankssts	2822.14	504.869	2821.86	529.626	-0.27586	-0.00978	122.871	4.35405	22.8166	0.80853	-267	291	-9.46137	10.3118	-20	96	3.40184	74.5137	2.64046	13.8368	0.49032	3	291	0.10631	10.3118	0.97276	0.93882	0.02386	0.00443	0.88469	0.04036	0.00749	0.99044	0.00417
wm-rh-caudalanteriorcingulate	3078.76	596.566	3081.55	576.623	2.7931	0.09068	145.938	4.73801	27.1	0.87983	-476	247	-15.4538	8.01908	-4	102.448	3.32608	102.154	3.31654	18.9696	0.61587	4	476	0.12986	15.4538	0.9701	0.93296	0.01681	0.00312	0.87434	0.02937	0.00545	0.91864	0.03685
wm-rh-caudalmiddlefrontal	6115.38	1080.55	6074.21	1103.48	-41.1724	-0.67553	234.931	3.85462	43.6256	0.71578	-715	331	-11.7313	5.43087	14	187.862	3.08234	142.814	2.3432	26.5198	0.43512	14	715	0.2297	11.7313	0.97695	0.94053	0.01685	0.00313	0.88773	0.02941	0.00546	0.35336	0.45178
wm-rh-cuneus	2382.83	352.687	2407	350.855	24.1724	1.00932	163.251	6.81658	30.315	1.26581	-180	545	-7.51593	22.7566	-25	119.069	4.97174	112.126	4.68186	20.8214	0.8694	19	545	0.79335	22.7566	0.89359	0.90656	0.03087	0.00573	0.82909	0.0499	0.00927	0.43194	0.36457
wm-rh-entorhinal	691.276	162.773	696.862	168.944	5.58621	0.80485	78.5036	11.3106	14.5778	2.10033	-122	273	-17.5775	39.3333	-16	58	8.35652	52.0673	7.50174	9.66865	1.39304	6	273	0.86447	39.3333	0.89114	0.84812	0.06449	0.01198	0.7363	0.09213	0.01711	0.70447	0.15214
wm-rh-frontalpole	260.345	68.4811	276.276	66.9978	15.931	5.93754	42.1959	15.7265	7.83558	2.92034	-95	132	-35.4068	49.1968	13	29.5172	11.0012	33.7783	12.5893	6.27247	2.33777	4	132	1.49081	49.1968	0.78728	0.84783	0.07001	0.013	0.73586	0.09926	0.01843	0.05161	1.28723
wm-rh-fusiform	6532.97	1083.48	6466.38	1123.55	-66.5862	-1.02445	223.561	3.43958	41.5143	0.63871	-678	286	-10.4313	4.40022	-45	169	2.60013	158.084	2.43219	29.3555	0.45165	9	678	0.13847	10.4313	0.97838	0.92384	0.0156	0.0029	0.85846	0.02648	0.00492	0.11995	0.921
wm-rh-inferiorparietal	11054.1	1615.59	11083.7	1526.35	29.5517	0.26698	309.991	2.80056	57.5639	0.52005	-726	644	-6.55893	5.81811	39	232.379	2.09939	202.658	1.83088	37.6326	0.33999	2	726	0.01807	6.55893	0.98104	0.95359	0.00861	0.0016	0.91129	0.01565	0.00291	0.61172	0.21345
wm-rh-inferiortemporal	5422.9	1125.93	5424.83	1031.16	1.93103	0.0356	202.344	3.73063	37.5744	0.69276	-600	372	-11.0622	6.85858	-9	148.345	2.73504	134.74	2.48421	25.0206	0.46131	1	600	0.01844	11.0622	0.98303	0.91968	0.0137	0.00254	0.8513	0.02325	0.00432	0.95938	0.01801
wm-rh-insula	9329.97	1457.56	9307.03	1407.68	-22.931	-0.24608	470.86	5.05296	87.4365	0.93831	-817	1251	-8.76751	13.4249	-39	370.862	3.97985	282.494	3.03154	52.4578	0.56294	5	1251	0.05366	13.4249	0.94769	0.91065	0.01515	0.00281	0.83596	0.02543	0.00472	0.79504	0.09961
wm-rh-isthmuscingulate	3526	550.245	3534.03	538.37	8.03448	0.2276	153.423	4.34625	28.49	0.80708	-529	229	-14.9858	6.48722	37	106.793	3.02529	108.598	3.07642	20.1661	0.57128	3	529	0.08499	14.9858	0.96152	0.92865	0.01681	0.00312	0.8668	0.02885	0.00536	0.78001	0.1079
wm-rh-lateraloccipital	8541.17	1358.45	8519	1280.93	-22.1724	-0.25993	381.615	4.47375	70.8641	0.83075	-1133	540	-13.2824	6.33053	-21	289.966	3.39933	243.015	2.84891	45.1267	0.52903	21	1133	0.24619	13.2824	0.9595	0.93106	0.01805	0.00335	0.87101	0.0313	0.00581	0.75669	0.12108
wm-rh-lateralorbitofrontal	6957.03	1002.13	6970.03	1153.91	13	0.18669	430.584	6.18342	79.9575	1.14823	-898	939	-12.8957	13.4845	-27	330.655	4.74838	268.962	3.86243	49.9449	0.71724	1	939	0.01436	13.4845	0.92319	0.92999	0.02041	0.00379	0.86914	0.03546	0.00658	0.87201	0.05948
wm-rh-lingual	5490.24	921.726	5523.14	845.574	32.8965	0.59739	276.013	5.01233	51.2544	0.93077	-310	802	-5.62952	14.5641	-30	221.103	4.01518	163.314	2.96574	30.3267	0.55072	12	802	0.21792	14.5641	0.95227	0.90878	0.02644	0.00491	0.8328	0.04286	0.00796	0.5262	0.27885
wm-rh-medialorbitofrontal	3532.03	580.988	3499.17	577.838	-32.8621	-0.93475	199.702	5.68046	37.0838	1.05483	-330	548	-9.38672	15.5877	-63	151.897	4.32064	130.778	3.71994	24.2849	0.69078	6	548	0.17067	15.5877	0.94103	0.92054	0.0273	0.00507	0.85277	0.04585	0.00851	0.38308	0.41671
wm-rh-middletemporal	5668.45	951.061	5666.66	945.179	-1.7931	-0.03164	123.233	2.17436	22.8838	0.40377	-227	213	-4.00526	3.75824	-29	106.69	1.88246	58.3139	1.02891	10.8286	0.19106	18	227	0.3176	4.00526	0.99184	0.92661	0.01211	0.00225	0.86325	0.0209	0.00388	0.9381	0.02775
wm-rh-paracentral	5042.34	944.694	5055.59	987.418	13.2414	0.26226	190.096	3.76504	35.2999	0.69915	-386	456	-7.64513	9.03155	-5	143.172	2.83568	122.831	2.4328	22.8092	0.45176	5	456	0.09903	9.03155	0.98122	0.94211	0.0199	0.0037	0.89056	0.03482	0.00647	0.7104	0.14849
wm-rh-parahippocampal	1508.45	270.324	1483.76	290.809	-24.6897	-1.65026	108.251	7.23551	20.1017	1.3436	-256	219	-17.1111	14.638	-19	90.3448	6.03868	62.417	4.17197	11.5905	0.77472	2	256	0.13368	17.1111	0.92441	0.89985	0.02568	0.00477	0.81794	0.04177	0.00776	0.22958	0.63906
wm-rh-parsopercularis	3350.72	691.366	3321.66	684.322	-29.069	-0.87132	172.955	5.18421	32.117	0.96268	-591	216	-17.7148	6.47445	-27	123.207	3.69304	122.746	3.67923	22.7934	0.68322	0	591	0	17.7148	0.96858	0.92234	0.01494	0.00277	0.85587	0.0258	0.00479	0.37314	0.42813
wm-rh-parsorbitalis	1157.9	231.424	1192.97	265.138	35.069	2.9835	67.4981	5.74241	12.5341	1.06634	-104	245	-8.84782	20.8434	36	56.5862	4.81408	50.1338	4.26514	9.30961	0.79202	2	245	0.17015	20.8434	0.95475	0.90878	0.02336	0.00434	0.83281	0.03845	0.00714	0.0092	2.03613
wm-rh-parstriangularis	3356.28	690.368	3302.55	642.649	-53.7241	-1.61362	102.059	3.06537	18.9518	0.56922	-408	169	-12.2544	5.07597	-43	74.4828	2.23711	87.5188	2.62866	16.2518	0.48813	0	408	0	12.2544	0.98547	0.92992	0.01576	0.00293	0.86903	0.02731	0.00507	0.00842	2.07481
wm-rh-pericalcarine	3371.34	713.698	3378.76	697.975	7.41379	0.21966	208.962	6.19137	38.8033	1.14971	-424	447	-12.5628	13.2442	16	155.069	4.59457	137.175	4.06437	25.4727	0.75473	16	447	0.47407	13.2442	0.95761	0.90408	0.034	0.00631	0.82495	0.05357	0.00995	0.84986	0.07065
wm-rh-postcentral	6797.21	1075.87	6813.07	1031.12	15.8621	0.23309	241.662	3.55117	44.8755	0.65944	-576	270	-8.46419	3.96759	75	187.655	2.75755	148.96	2.18893	27.6611	0.40647	1	576	0.01469	8.46419	0.97449	0.92918	0.01673	0.00311	0.86773	0.02874	0.00534	0.72638	0.13883
wm-rh-posteriorcingulate	4357.79	616.039	4304.52	593.07	-53.2759	-1.23006	188.529	4.35286	35.009	0.80831	-322	450	-7.43451	10.3898	-78	159.345	3.67904	110.387	2.54868	20.4984	0.47328	3	450	0.06927	10.3898	0.94924	0.93517	0.01666	0.00309	0.87823	0.02873	0.00534	0.13928	0.85611
wm-rh-precentral	13379.9	1898.53	13389	1945.84	9.17241	0.06853	292.9	2.18836	54.3902	0.40637	-534	567	-3.9897	4.23626	50	242.828	1.81425	157.501	1.17675	29.2472	0.21852	20	567	0.14943	4.23626	0.98878	0.95462	0.00994	0.00185	0.91319	0.01799	0.00334	0.86729	0.06183
wm-rh-precuneus	10134.9	1608.87	10175.3	1609.41	40.3793	0.39763	187.187	1.84329	34.7598	0.34229	-373	332	-3.67304	3.2693	44	150.448	1.48151	115.26	1.13499	21.4032	0.21076	1	373	0.00985	3.67304	0.99315	0.95344	0.01058	0.00196	0.91102	0.0192	0.00357	0.25518	0.59316
wm-rh-rostralanteriorcingulate	2240.07	354.28	2235.72	339.055	-4.34483	-0.19415	214.166	9.56995	39.7695	1.77709	-427	423	-19.0804	18.9017	-19	170.897	7.63648	125.051	5.58788	23.2214	1.03764	10	427	0.44685	19.0804	0.81516	0.88621	0.03553	0.0066	0.79567	0.05623	0.01044	0.91378	0.03916
wm-rh-rostralmiddlefrontal	12962.1	2775.32	12922.2	2683.07	-39.8276	-0.30774	296.704	2.29254	55.0966	0.42571	-1262	386	-9.75108	2.9825	46	177.345	1.37029	238.96	1.84637	44.3737	0.34286	15	1262	0.1159	9.75108	0.99419	0.95764	0.00838	0.00156	0.91872	0.01536	0.00285	0.47576	0.32262
wm-rh-superiorfrontal	17832.8	2346.55	17926.2	2451.36	93.4138	0.52246	362.986	2.03019	67.4049	0.377	-578	1010	-3.23276	5.64894	68	278.448	1.55736	245.956	1.37563	45.6729	0.25545	10	1010	0.05593	5.64894	0.9882	0.95901	0.00947	0.00176	0.92126	0.01732	0.00322	0.17673	0.75269
wm-rh-superiorparietal	11228.2	1838.69	11222.9	1797.27	-5.31034	-0.04731	286.313	2.55054	53.167	0.47362	-885	810	-7.88378	7.21566	-28	189.448	1.68765	211.735	1.88618	39.3182	0.35026	2	885	0.01782	7.88378	0.98802	0.95029	0.01031	0.00192	0.90529	0.01855	0.00344	0.92115	0.03567
wm-rh-superiortemporal	6441.66	985.003	6407.07	1000.43	-34.5862	-0.53836	116.34	1.81092	21.6038	0.33628	-289	173	-4.4985	2.69287	-20	90.8621	1.41434	78.8872	1.22794	14.649	0.22802	1	289	0.01557	4.4985	0.99276	0.93624	0.00904	0.00168	0.88012	0.016	0.00297	0.12062	0.91859
wm-rh-supramarginal	8584.97	1513.56	8580.41	1519.89	-4.55172	-0.05303	268.336	3.12648	49.8287	0.58057	-855	565	-9.96191	6.58302	-18	189.034	2.20251	187.124	2.18024	34.748	0.40486	2	855	0.0233	9.96191	0.98488	0.95203	0.01247	0.00232	0.90845	0.02249	0.00418	0.92787	0.03251
wm-rh-temporalpole	578.172	140.601	575.31	129.063	-2.86207	-0.49625	86.9658	15.0788	16.1491	2.80007	-294	181	-50.9761	31.3832	12	62.4483	10.8278	59.4346	10.3052	11.0367	1.91364	1	294	0.17339	50.9761	0.79861	0.81492	0.05994	0.01113	0.68765	0.08114	0.01507	0.86061	0.0652
wm-rh-transversetemporal	518.241	115.961	520.655	107.325	2.41379	0.46468	63.2091	12.1685	11.7376	2.25964	-127	158	-24.449	30.4169	4	48.2759	9.29368	39.8451	7.67067	7.39906	1.42441	1	158	0.19251	30.4169	0.84484	0.83092	0.05371	0.00997	0.71075	0.07655	0.01421	0.83856	0.07647
Brain Mask Volume	1.52386e+06	168010	1.52392e+06	168072	53.2414	0.00349	356.558	0.0234	66.2112	0.00434	-699	1654	-0.04587	0.10854	0	121.172	0.00795	338.914	0.02224	62.9347	0.00413	0	1654	0	0.10854	1	0.9993	0.0015	0.00028	0.9986	0.00299	0.00056	0.42811	0.36845
Brain Segmentation Volume	231705	29530.6	231945	29106.4	240.103	0.10357	915.85	0.39506	170.069	0.07336	-2695	2400	-1.16251	1.03526	79	603.345	0.26026	722.124	0.3115	134.095	0.05784	4	2695	0.00173	1.16251	0.9995	0.98566	0.00636	0.00118	0.97172	0.01234	0.00229	0.16903	0.77205
Brain Segmentation Volume Without Ventricles	211162	30237.4	211406	29860.5	243.828	0.1154	927.782	0.43912	172.285	0.08154	-2481	2364	-1.17425	1.11887	59	602.517	0.28517	739.164	0.34984	137.259	0.06496	20	2481	0.00947	1.17425	0.99951	0.98368	0.00725	0.00135	0.96788	0.01402	0.0026	0.16802	0.77464
Ventricles	17624.2	10605.3	17642.2	10590.9	18.0345	0.10228	115.995	0.65782	21.5397	0.12215	-333	306	-1.88848	1.73536	5	78.4483	0.44489	86.1264	0.48843	15.9933	0.0907	2	333	0.01134	1.88848	0.99994	0.98285	0.00974	0.00181	0.96628	0.0186	0.00345	0.40953	0.38771
Left Medial-inferior Temporal Gyrus	31128.9	4896.49	31104.6	4942.56	-24.3448	-0.07824	764.247	2.45607	141.917	0.45608	-1056	1674	-3.39367	5.37974	5	608.483	1.95548	448.568	1.44157	83.297	0.26769	5	1674	0.01607	5.37974	0.98833	0.9547	0.00776	0.00144	0.91332	0.01414	0.00263	0.86503	0.06297
Right Medial-inferior Temporal Gyrus	31868.5	5275.74	31970.5	5051	102	0.31955	668.777	2.0952	124.189	0.38907	-1030	1681	-3.22687	5.26638	270	575.379	1.8026	339.342	1.06312	63.0143	0.19742	114	1681	0.35715	5.26638	0.99171	0.9527	0.00766	0.00142	0.90968	0.01391	0.00258	0.4184	0.37841
Left Superior Temporal Gyrus	19449.3	2401.16	19443.4	2525.69	-5.82759	-0.02997	350.607	1.80294	65.106	0.3348	-628	938	-3.2294	4.82352	46	272.724	1.40244	214.302	1.10202	39.7948	0.20464	29	938	0.14913	4.82352	0.99022	0.94771	0.00823	0.00153	0.90061	0.0147	0.00273	0.92931	0.03184
Right Superior Temporal Gyrus	18396.8	2255.53	18369.8	2268.32	-27	-0.14687	297.497	1.6183	55.2438	0.30051	-637	476	-3.4651	2.58931	2	244.586	1.33048	165.229	0.8988	30.6823	0.1669	2	637	0.01088	3.4651	0.99158	0.95126	0.00744	0.00138	0.90706	0.01345	0.0025	0.62883	0.20147
Left Temporal Lobe	83524	10372.3	83450.8	10563.9	-73.2414	-0.08773	1128.65	1.35188	209.585	0.25104	-2500	1720	-2.99446	2.06019	10	886.414	1.06173	682.36	0.81732	126.711	0.15177	10	2500	0.01198	2.99446	0.99436	0.96487	0.00669	0.00124	0.93212	0.01241	0.0023	0.72936	0.13706
Right Temporal Lobe	81926.8	10689.7	81839.5	10667.7	-87.3448	-0.10667	1049.25	1.2814	194.841	0.23795	-1905	2395	-2.32649	2.9249	-129	850.724	1.03895	599.376	0.73199	111.301	0.13593	95	2395	0.11602	2.9249	0.99531	0.96453	0.00572	0.00106	0.93149	0.01059	0.00197	0.6574	0.18217

## Sheet: Between-version Mac
v4.3.1 vs. v4.5.0
Struct	Mean1	sd1	Mean2	sd2	Mean diff	Mean diff %	sd Diff	sd Diff %	se Diff	se Diff %	min Diff	max Diff	min Diff %	max Diff %	median	Mean AbsDiff	Mean AbsDiff %	sd AbsDiff	sd AbsDiff %	se AbsDiff	se AbsDiff %	min AbsDiff	max AbsDiff	min AbsDiff %	max AbsDiff %	ICC	SI	sd SI	se SI	OR	sd OR	se OR	p	-log10(p)
3rd-Ventricle	958	447.312	960.133	446.474	2.13333	0.22244	37.5369	3.9139	6.85326	0.71458	-130	104	-13.5548	10.8439	0	18	1.87682	32.8413	3.4243	5.99598	0.62519	0	130	0	13.5548	0.99658	0.98061	0.02294	0.00419	0.96195	0.04272	0.0078	0.75781	0.120439
4th-Ventricle	1856.17	748.656	1852.53	754.19	-3.63333	-0.19594	28.4793	1.53581	5.19958	0.2804	-109	49	-5.87807	2.64244	0	16.7667	0.90418	23.1065	1.24607	4.21865	0.2275	0	109	0	5.87807	0.99929	0.97891	0.02098	0.00383	0.95868	0.03931	0.00718	0.49026	0.309574
5th-Ventricle	6.43333	8.47993	6.8	9.17418	0.36667	5.54156	4.28698	64.7906	0.78269	11.8291	-9	13	-136.02	196.474	0	2.3	34.7607	3.61176	54.5858	0.65941	9.96596	0	13	0	196.474	0.88514	0.77078	0.42307	0.07724	0.62705	0.41732	0.07619	0.64295	0.191824
Brain-Stem	18117	2213.02	18088.1	2250.03	-28.9333	-0.15983	112.811	0.62318	20.5965	0.11378	-386	74	-2.1323	0.40878	0	66.3333	0.36643	95.0819	0.52524	17.3595	0.0959	0	386	0	2.1323	0.99868	0.98912	0.01133	0.00207	0.97847	0.02183	0.00398	0.17071	0.767741
CC_Anterior	963.233	172.333	963.6	171.144	0.36667	0.03806	15.8734	1.64761	2.89807	0.30081	-43	51	-4.46328	5.29366	0	9.36667	0.97223	12.7021	1.31844	2.31908	0.24071	0	51	0	5.29366	0.99587	0.98344	0.03403	0.00621	0.96743	0.05927	0.01082	0.90019	0.0456661
CC_Central	484.8	122.549	485.167	124.237	0.36667	0.0756	24.9931	5.15339	4.56309	0.94088	-89	91	-18.3512	18.7635	0	9.5	1.95883	23.0528	4.75332	4.20884	0.86783	0	91	0	18.7635	0.98016	0.98196	0.02548	0.00465	0.96456	0.04725	0.00863	0.93651	0.0284897
CC_Mid_Anterior	512.967	131.976	513.4	132.905	0.43333	0.08444	6.2128	1.21064	1.1343	0.22103	-9	21	-1.75376	4.0921	0	4.1	0.79893	4.62639	0.90151	0.84466	0.16459	0	21	0	4.0921	0.99893	0.98529	0.02975	0.00543	0.971	0.05378	0.00982	0.70523	0.151673
CC_Mid_Posterior	470.967	103.335	471.3	102.502	0.33333	0.07075	2.84464	0.60379	0.51936	0.11024	-6	9	-1.27352	1.91029	0	1.6	0.33961	2.35767	0.50043	0.43045	0.09136	0	9	0	1.91029	0.99963	0.98734	0.03207	0.00585	0.97499	0.05635	0.01029	0.52603	0.278986
CC_Posterior	916.7	163.07	915.5	164.828	-1.2	-0.13099	8.55167	0.93349	1.56131	0.17043	-34	15	-3.71139	1.63738	0	4.13333	0.45119	7.54633	0.82375	1.37777	0.15039	0	34	0	3.71139	0.99866	0.98861	0.02806	0.00512	0.97748	0.04971	0.00908	0.44835	0.348378
CSF	1203.7	287.514	1218.3	307.772	14.6	1.20562	51.1803	4.22628	9.3442	0.77161	-60	249	-4.95458	20.5615	3	25.2	2.08092	46.7225	3.85818	8.53032	0.7044	0	249	0	20.5615	0.98453	0.96535	0.03206	0.00585	0.93301	0.05808	0.0106	0.12903	0.889322
Left-Accumbens-area	584.6	124.642	593.133	129.953	8.53333	1.44911	38.0233	6.45704	6.94208	1.17889	-58	130	-9.84943	22.0763	0	20	3.39635	33.2763	5.6509	6.07539	1.03171	0	130	0	22.0763	0.95467	0.94447	0.06337	0.01157	0.89478	0.10425	0.01903	0.22887	0.640411
Left-Amygdala	1747.6	350.809	1775	345.385	27.4	1.55567	41.2173	2.34017	7.52522	0.42725	-32	146	-1.81684	8.28933	14.5	31.4667	1.78656	38.0949	2.16289	6.95515	0.39489	0	146	0	8.28933	0.99014	0.96285	0.03752	0.00685	0.92836	0.06713	0.01226	0.00105	2.97884
Left-Caudate	4001.9	589.949	3991.17	585.172	-10.7333	-0.26857	60.4477	1.5125	11.0362	0.27614	-184	116	-4.60399	2.90252	0	33.6667	0.8424	50.9958	1.276	9.31052	0.23296	0	184	0	4.60399	0.99472	0.98234	0.01709	0.00312	0.9653	0.03257	0.00595	0.33882	0.470037
Left-Cerebellum-Cortex	47432.4	6455.42	47494.2	6544.57	61.8	0.13021	406.57	0.8566	74.2292	0.15639	-440	1383	-0.92703	2.91383	0	232	0.4888	337.001	0.71003	61.5277	0.12963	0	1383	0	2.91383	0.99806	0.98198	0.0176	0.00321	0.9646	0.03345	0.00611	0.4119	0.385211
Left-Cerebellum-White-Matter	16168.6	2525.75	16032.5	2649.78	-136.067	-0.8451	355.407	2.20742	64.8882	0.40302	-1462	97	-9.08043	0.60246	-6	151.067	0.93827	349.083	2.16814	63.7335	0.39585	0	1462	0	9.08043	0.98951	0.98307	0.03114	0.00568	0.96671	0.05383	0.00983	0.04483	1.34841
Left-Cerebral-Cortex	261034	34318.3	260946	34571.2	-87.6333	-0.03358	1340.29	0.51354	244.703	0.09376	-5760	3029	-2.20698	1.16058	0	605.3	0.23192	1193.86	0.45744	217.968	0.08352	0	5760	0	2.20698	0.99926	0.98661	0.01303	0.00238	0.97357	0.02506	0.00458	0.72285	0.140955
Left-Cerebral-White-Matter	208114	30665.6	208333	30256.7	219.733	0.10553	1230.68	0.59104	224.69	0.10791	-778	5478	-0.37364	2.63083	-10.5	517.067	0.24832	1134.87	0.54503	207.198	0.09951	0	5478	0	2.63083	0.99919	0.99223	0.00818	0.00149	0.98458	0.01591	0.00291	0.33619	0.473411
Left-Hippocampus	4083.83	504.176	4080.83	501.961	-3	-0.07349	46.0262	1.12745	8.4032	0.20584	-132	96	-3.23344	2.3516	0.5	28.7333	0.70385	35.6882	0.87421	6.51575	0.15961	0	132	0	3.23344	0.99594	0.96963	0.0299	0.00546	0.94104	0.05532	0.0101	0.72367	0.14046
Left-Inf-Lat-Vent	388	308.573	391.9	321.501	3.9	1.00013	34.9614	8.96561	6.38305	1.63689	-125	117	-32.0554	30.0038	0	16.7667	4.2997	30.7769	7.89253	5.61907	1.44097	0	125	0	32.0554	0.99397	0.93644	0.06234	0.01138	0.88049	0.10433	0.01905	0.54596	0.262835
Left-Lateral-Ventricle	8775.97	6487.05	8775.13	6462.74	-0.83333	-0.0095	54.3038	0.61881	9.91447	0.11298	-124	133	-1.41302	1.51557	0	33.6333	0.38326	42.1831	0.48069	7.70154	0.08776	0	133	0	1.51557	0.99997	0.98775	0.01549	0.00283	0.9758	0.02952	0.00539	0.93359	0.0298447
Left-Pallidum	1627.9	368.569	1759.83	249.104	131.933	7.78889	197.959	11.6868	36.1422	2.13371	-75	694	-4.42774	40.9714	45	142.467	8.41074	190.257	11.2321	34.736	2.05069	0	694	0	40.9714	0.73154	0.88767	0.1561	0.0285	0.79803	0.21068	0.03847	0.00102	2.9896
Left-Putamen	6139.03	797.121	6174.5	758.079	35.4667	0.57606	102.777	1.66933	18.7644	0.30478	-213	324	-3.45961	5.2625	0	68.8667	1.11855	83.4158	1.35486	15.2296	0.24736	0	324	0	5.2625	0.99053	0.97543	0.02207	0.00403	0.95203	0.04147	0.00757	0.06878	1.16256
Left-Thalamus-Proper	7270.03	876.051	7209.3	866.832	-60.7333	-0.8389	102.541	1.41637	18.7213	0.25859	-377	134	-5.20742	1.85091	-34	73.4667	1.01478	93.5247	1.29184	17.0752	0.23586	0	377	0	5.20742	0.99089	0.98362	0.0154	0.00281	0.96776	0.02947	0.00538	0.00296	2.52808
Left-VentralDC	3866.8	416.272	3887.03	432.978	20.2333	0.52189	70.6085	1.82125	12.8913	0.33251	-120	239	-3.09524	6.16469	2	43.2333	1.11515	58.9533	1.52062	10.7634	0.27763	0	239	0	6.16469	0.98551	0.96833	0.02692	0.00491	0.9386	0.0502	0.00916	0.12737	0.894929
Left-choroid-plexus	1637.67	334.538	1628.87	342.898	-8.8	-0.5388	69.9849	4.28497	12.7774	0.78232	-186	186	-11.3882	11.3882	0	41.4667	2.53888	56.5617	3.4631	10.3267	0.63227	0	186	0	11.3882	0.97903	0.93636	0.05952	0.01087	0.88034	0.10098	0.01844	0.49648	0.304102
Left-vessel	84.3667	48.1259	86.2333	51.2477	1.86667	2.18835	12.1591	14.2545	2.21994	2.60251	-20	46	-23.4467	53.9273	0	7.06667	8.28449	9.98942	11.7109	1.82381	2.13811	0	46	0	53.9273	0.97037	0.89957	0.09114	0.01664	0.81747	0.14904	0.02721	0.4073	0.390083
Optic-Chiasm	198.867	96.5579	195.333	102.19	-3.53333	-1.79266	35.3297	17.9248	6.45029	3.2726	-109	58	-55.3019	29.4267	0	19.7333	10.0118	29.2963	14.8637	5.34874	2.71372	0	109	0	55.3019	0.93828	0.91781	0.16072	0.02934	0.8481	0.21637	0.0395	0.58804	0.230597
Right-Accumbens-area	697.433	102.706	696.267	109.803	-1.16667	-0.16742	14.5272	2.0847	2.6523	0.38061	-40	31	-5.74012	4.44859	0	9.43333	1.35371	10.9723	1.57456	2.00326	0.28747	0	40	0	5.74012	0.99091	0.95602	0.04038	0.00737	0.91574	0.07317	0.01336	0.66329	0.178295
Right-Amygdala	1803.73	331.037	1809.6	336.748	5.86667	0.32472	39.7585	2.20066	7.25888	0.40178	-59	132	-3.26568	7.30627	0	24.6667	1.36531	31.4153	1.73885	5.73562	0.31747	0	132	0	7.30627	0.99299	0.9705	0.03145	0.00574	0.94269	0.05747	0.01049	0.42555	0.371048
Right-Caudate	4067.87	589.165	4060.37	581.373	-7.5	-0.18454	54.4748	1.34038	9.94569	0.24472	-226	65	-5.56086	1.59936	0	28.5	0.70126	46.7486	1.15028	8.53509	0.21001	0	226	0	5.56086	0.99573	0.98197	0.01709	0.00312	0.96458	0.03258	0.00595	0.45687	0.340205
Right-Cerebellum-Cortex	47507.6	7053.15	47503.1	6987.75	-4.43333	-0.00933	338.432	0.71241	61.7889	0.13007	-1046	1373	-2.20186	2.8902	0	143.567	0.30221	305.343	0.64276	55.7478	0.11735	0	1373	0	2.8902	0.99888	0.98351	0.01662	0.00303	0.96756	0.03167	0.00578	0.94329	0.0253541
Right-Cerebellum-White-Matter	15802.9	2573.71	15827.2	2525.14	24.3333	0.15386	97.8025	0.61841	17.8562	0.11291	-167	440	-1.05596	2.78216	0	50.9333	0.32206	86.5691	0.54738	15.8053	0.09994	0	440	0	2.78216	0.99924	0.98572	0.01484	0.00271	0.97184	0.02819	0.00515	0.18345	0.736472
Right-Cerebral-Cortex	260556	35183.6	260477	35157.6	-78.9333	-0.0303	602.199	0.23116	109.946	0.0422	-2309	899	-0.88632	0.34508	0	348.2	0.13366	493.624	0.18948	90.1231	0.03459	0	2309	0	0.88632	0.99986	0.98722	0.01261	0.0023	0.97477	0.02436	0.00445	0.47855	0.320075
Right-Cerebral-White-Matter	211593	31165.6	211300	30918.1	-293.067	-0.1386	1289.11	0.60966	235.358	0.11131	-5110	2814	-2.41669	1.33083	-4.5	550.467	0.26033	1198.83	0.56697	218.875	0.10351	0	5110	0	2.41669	0.99912	0.99256	0.00705	0.00129	0.98522	0.01383	0.00252	0.22303	0.651641
Right-Hippocampus	4191.27	491.988	4184.33	489.937	-6.93333	-0.16556	33.6257	0.80294	6.13918	0.1466	-84	59	-2.00583	1.40885	0	23.4	0.55877	24.7785	0.59168	4.52391	0.10803	0	84	0	2.00583	0.99763	0.97468	0.02405	0.00439	0.95061	0.04492	0.0082	0.268	0.571862
Right-Inf-Lat-Vent	335.6	283.38	337.867	291.237	2.26667	0.67313	17.8942	5.31406	3.26702	0.97021	-26	62	-7.72124	18.4122	0	11.3333	3.36567	13.8796	4.12184	2.53406	0.75254	0	62	0	18.4122	0.99809	0.95347	0.04068	0.00743	0.91109	0.07304	0.01334	0.49333	0.306864
Right-Lateral-Ventricle	7753.4	4230.54	7752.13	4219.73	-1.26667	-0.01634	46.3584	0.59796	8.46384	0.10917	-150	112	-1.93479	1.44465	0	25.4667	0.32848	38.4687	0.49619	7.0234	0.09059	0	150	0	1.93479	0.99994	0.98602	0.01658	0.00303	0.97242	0.03155	0.00576	0.88207	0.0544953
Right-Pallidum	1450.4	270.97	1545.17	179.775	94.7667	6.32713	163.301	10.9028	29.8145	1.99057	-25	642	-1.66913	42.8633	18.5	97.1	6.48291	161.876	10.8077	29.5544	1.97321	0	642	0	42.8633	0.6834	0.88896	0.16601	0.03031	0.80011	0.22045	0.04025	0.00351	2.45529
Right-Putamen	5816.13	741.211	5869.53	709.09	53.4	0.91394	110	1.88264	20.0831	0.34372	-74	449	-1.26651	7.68463	15.5	65.8	1.12617	102.815	1.75967	18.7713	0.32127	0	449	0	7.68463	0.98619	0.97582	0.02277	0.00416	0.95278	0.04296	0.00784	0.01263	1.89871
Right-Thalamus-Proper	7426.07	939.699	7380.47	936.406	-45.6	-0.61594	122.536	1.65516	22.3719	0.30219	-576	111	-7.78035	1.49934	-9.5	66.4667	0.8978	112.232	1.51597	20.4906	0.27678	0	576	0	7.78035	0.99058	0.98459	0.01509	0.00276	0.96965	0.02891	0.00528	0.05073	1.2947
Right-VentralDC	3869.5	398.532	3878.17	425.3	8.66667	0.22372	57.5478	1.48555	10.5067	0.27122	-107	154	-2.76212	3.97539	0	39.6	1.02224	42.0382	1.08518	7.6751	0.19813	0	154	0	3.97539	0.99035	0.97253	0.02565	0.00468	0.94652	0.04794	0.00875	0.41618	0.38072
Right-choroid-plexus	1763.5	407.956	1756.63	405.125	-6.86667	-0.39014	79.3055	4.50582	14.4791	0.82265	-270	176	-15.3403	9.99962	0	45.7333	2.59839	64.6102	3.6709	11.7962	0.67021	0	270	0	15.3403	0.98146	0.93637	0.05807	0.0106	0.88035	0.09979	0.01822	0.63888	0.194581
Right-vessel	62.0667	45.7218	64.4333	42.7839	2.36667	3.74177	8.17263	12.9212	1.49211	2.35907	-17	20	-26.8775	31.6206	0	5.63333	8.90646	6.30535	9.96894	1.15119	1.82007	0	20	0	31.6206	0.98211	0.917	0.10467	0.01911	0.84672	0.16413	0.02997	0.12356	0.908131
ctx-lh-bankssts	2481.43	484.136	2453.13	438.782	-28.3	-1.14701	194.065	7.86554	35.4313	1.43605	-531	252	-21.5217	10.2137	0	120.1	4.8677	153.52	6.22223	28.0288	1.13602	0	531	0	21.5217	0.9128	0.91097	0.06632	0.01211	0.83651	0.11193	0.02044	0.43094	0.36558
ctx-lh-caudalanteriorcingulate	1960.73	623.027	1941.17	628.535	-19.5667	-1.00293	104.69	5.36612	19.1137	0.97971	-360	211	-18.4525	10.8152	0	60.5667	3.10447	86.9557	4.45709	15.8759	0.81375	0	360	0	18.4525	0.98598	0.91303	0.06245	0.0114	0.83997	0.10798	0.01971	0.31444	0.502457
ctx-lh-caudalmiddlefrontal	7192.63	1040.67	7031.4	1139.4	-161.233	-2.26706	506.684	7.12433	92.5074	1.30072	-1858	836	-26.1248	11.7547	0	278.567	3.91684	450.939	6.34052	82.3298	1.15762	0	1858	0	26.1248	0.88528	0.9428	0.05528	0.01009	0.8918	0.09307	0.01699	0.09194	1.03648
ctx-lh-cuneus	2926.87	399.864	2861.8	399.197	-65.0667	-2.24807	280.261	9.6831	51.1685	1.76788	-1209	266	-41.7713	9.19037	0	142	4.90614	249.132	8.60758	45.4851	1.57152	0	1209	0	41.7713	0.74954	0.8908	0.08639	0.01577	0.8031	0.13872	0.02533	0.21361	0.670373
ctx-lh-entorhinal	1688.57	381.591	1644.27	313.505	-44.3	-2.6584	203.25	12.1968	37.1082	2.22683	-525	276	-31.5047	16.5625	0	145.7	8.74331	146.22	8.77452	26.696	1.602	0	525	0	31.5047	0.82843	0.87261	0.09397	0.01716	0.77401	0.15083	0.02754	0.24223	0.615773
ctx-lh-frontalpole	665.133	178.532	686.167	213.086	21.0333	3.11305	70.3746	10.4158	12.8486	1.90166	-73	292	-10.8044	43.2176	0	42.4333	6.28037	59.5614	8.81543	10.8744	1.60947	0	292	0	43.2176	0.93245	0.8903	0.07842	0.01432	0.80229	0.12947	0.02364	0.11243	0.949098
ctx-lh-fusiform	8931.93	1817.84	9072.07	1737.55	140.133	1.55669	465.339	5.16928	84.9589	0.94378	-742	1493	-8.24261	16.5852	0	308.467	3.42665	372.051	4.13298	67.9269	0.75458	0	1493	0	16.5852	0.96383	0.92172	0.06434	0.01175	0.85481	0.10876	0.01986	0.10985	0.959191
ctx-lh-inferiorparietal	12100.2	2234.57	12006.6	2254.16	-93.6	-0.77654	638.644	5.29846	116.6	0.96736	-2610	971	-21.6536	8.05582	0	362.6	3.00828	530.016	4.39723	96.7673	0.80282	0	2610	0	21.6536	0.95999	0.94693	0.03897	0.00712	0.8992	0.07036	0.01285	0.42865	0.367895
ctx-lh-inferiortemporal	9126.03	2075.51	9243.4	2267.22	117.367	1.27785	691.947	7.53367	126.332	1.37545	-1566	2649	-17.0501	28.8414	0	346.967	3.77765	607.044	6.60929	110.831	1.20669	0	2649	0	28.8414	0.94955	0.91545	0.06714	0.01226	0.84409	0.11374	0.02077	0.36054	0.44305
ctx-lh-insula	6351.97	797.986	6343.27	752.207	-8.7	-0.13706	116.067	1.82852	21.1909	0.33384	-249	259	-3.92273	4.08027	0	79.1667	1.24719	84.0624	1.32431	15.3476	0.24179	0	259	0	4.08027	0.98911	0.94463	0.03599	0.00657	0.89507	0.06639	0.01212	0.68442	0.16468
ctx-lh-isthmuscingulate	2374.67	405.944	2427.47	428.457	52.8	2.19902	101.241	4.2165	18.484	0.76982	-95	293	-3.95657	12.2029	12.5	75	3.12361	85.5264	3.56202	15.6149	0.65033	0	293	0	12.2029	0.96368	0.9027	0.06435	0.01175	0.82265	0.11122	0.02031	0.00784	2.10568
ctx-lh-lateraloccipital	11708.3	1824.66	11740	2010.49	31.6667	0.2701	920.074	7.84767	167.982	1.43278	-1772	3930	-15.1141	33.5205	0	480.333	4.09695	780.319	6.65565	142.466	1.21515	0	3930	0	33.5205	0.88865	0.92567	0.06091	0.01112	0.86162	0.10245	0.0187	0.85179	0.0696695
ctx-lh-lateralorbitofrontal	7968.3	1118.88	7947.07	1134.64	-21.2333	-0.26683	203.759	2.56053	37.2011	0.46749	-648	571	-8.14307	7.17546	0	123.3	1.54945	162.04	2.03627	29.5843	0.37177	0	648	0	8.14307	0.98401	0.94719	0.03464	0.00632	0.89968	0.06397	0.01168	0.57255	0.242184
ctx-lh-lingual	6451.77	1065.48	6464.17	999.591	12.4	0.19201	504.739	7.81576	92.1523	1.42696	-1129	2073	-17.4823	32.0999	0	249.533	3.86396	436.47	6.75863	79.6882	1.23395	0	2073	0	32.0999	0.88432	0.91019	0.06957	0.0127	0.83519	0.11553	0.02109	0.89389	0.0487148
ctx-lh-medialorbitofrontal	4368.63	803.381	4303.77	727.513	-64.8667	-1.49593	358.612	8.27019	65.4733	1.50992	-1386	524	-31.9635	12.0843	0	215.133	4.96133	291.68	6.72662	53.2532	1.22811	0	1386	0	31.9635	0.89059	0.91587	0.05896	0.01076	0.8448	0.10083	0.01841	0.33001	0.481472
ctx-lh-middletemporal	9956.07	1694.38	9875.33	1654.45	-80.7333	-0.8142	313.302	3.15966	57.2009	0.57687	-1114	406	-11.2347	4.09452	0	220.133	2.22005	234.033	2.36022	42.7283	0.43092	0	1114	0	11.2347	0.98192	0.9172	0.06976	0.01274	0.84707	0.11479	0.02096	0.16877	0.772714
ctx-lh-paracentral	4048.53	709.831	4021.1	751.191	-27.4333	-0.67992	195.392	4.84264	35.6735	0.88414	-910	175	-22.5537	4.33725	0	93.1667	2.30907	173.139	4.29112	31.6107	0.78345	0	910	0	22.5537	0.96474	0.94274	0.04549	0.00831	0.89167	0.07928	0.01447	0.4481	0.348621
ctx-lh-parahippocampal	2215.5	365.19	2298.23	420.122	82.7333	3.66585	203.535	9.01847	37.1602	1.64654	-243	664	-10.7671	29.4213	9	138.267	6.12649	169.5	7.51043	30.9464	1.37121	0	664	0	29.4213	0.85	0.88722	0.08057	0.01471	0.7973	0.13323	0.02432	0.03392	1.46958
ctx-lh-parsopercularis	5107.7	676.914	5088.63	677.923	-19.0667	-0.37399	212.6	4.17012	38.8152	0.76136	-428	514	-8.39517	10.0821	0	147.667	2.89647	151.714	2.97586	27.6991	0.54332	0	514	0	10.0821	0.95197	0.94099	0.03962	0.00723	0.88856	0.07219	0.01318	0.62697	0.202755
ctx-lh-parsorbitalis	2435.13	614.609	2451.23	578.358	16.1	0.65898	169.687	6.94531	30.9804	1.26803	-409	575	-16.7404	23.5349	0	96.3667	3.94431	139.481	5.70898	25.4656	1.04231	0	575	0	23.5349	0.96054	0.92966	0.05278	0.00964	0.86857	0.09144	0.01669	0.60723	0.216648
ctx-lh-parstriangularis	3739.3	756.8	3683.77	861.132	-55.5333	-1.49624	273.897	7.37962	50.0065	1.34733	-764	513	-20.5845	13.8218	0	175.8	4.73659	215.031	5.7936	39.2592	1.05776	0	764	0	20.5845	0.94249	0.92558	0.06211	0.01134	0.86148	0.10447	0.01907	0.2759	0.559254
ctx-lh-pericalcarine	2083.27	409.205	2037.83	403.649	-45.4333	-2.20491	271.473	13.1748	49.5639	2.40537	-891	811	-43.2409	39.3584	0	152.967	7.42358	227.216	11.027	41.4838	2.01324	0	891	0	43.2409	0.77799	0.87802	0.1045	0.01908	0.78256	0.15678	0.02862	0.36688	0.435476
ctx-lh-postcentral	10533.8	1677.92	10591.7	1651.09	57.9	0.54815	177.141	1.67704	32.3414	0.30618	-356	593	-3.37035	5.61409	1.5	108.567	1.02783	150.512	1.42494	27.4796	0.26016	0	593	0	5.61409	0.99392	0.95391	0.03079	0.00562	0.91188	0.05733	0.01047	0.08386	1.07646
ctx-lh-posteriorcingulate	3695.43	680.805	3693.9	700.3	-1.53333	-0.0415	112.63	3.04844	20.5633	0.55657	-223	338	-6.03573	9.14832	0	72.6667	1.9668	85.002	2.30067	15.5192	0.42004	0	338	0	9.14832	0.98714	0.92261	0.05238	0.00956	0.85634	0.09299	0.01698	0.94107	0.026379
ctx-lh-precentral	14402.6	1994.99	14498	2008.66	95.3667	0.65996	373.437	2.58428	68.18	0.47182	-259	1531	-1.79235	10.5949	0	199.567	1.38105	328.121	2.27069	59.9065	0.41457	0	1531	0	10.5949	0.98205	0.95879	0.03202	0.00585	0.92084	0.05814	0.01061	0.17249	0.763229
ctx-lh-precuneus	10105.2	1513.71	10069.2	1499.36	-35.9667	-0.35656	218.103	2.16217	39.82	0.39476	-678	359	-6.72138	3.55896	0	141.167	1.39946	168.202	1.66748	30.7094	0.30444	0	678	0	6.72138	0.98958	0.94697	0.03395	0.0062	0.89929	0.06294	0.01149	0.37384	0.427307
ctx-lh-rostralanteriorcingulate	2260.87	581.613	2269.23	586.489	8.36667	0.36938	83.5032	3.6866	15.2455	0.67308	-200	305	-8.82983	13.4655	0	50.9	2.24719	66.0686	2.91687	12.0624	0.53255	0	305	0	13.4655	0.99002	0.91624	0.05761	0.01052	0.84543	0.10111	0.01846	0.58735	0.231105
ctx-lh-rostralmiddlefrontal	16154.7	3723.09	16286.9	3675.45	132.2	0.815	478.559	2.95029	87.3725	0.53865	-732	1455	-4.51273	8.96998	0	321.4	1.98141	374.484	2.30867	68.3711	0.4215	0	1455	0	8.96998	0.99127	0.95055	0.03698	0.00675	0.90576	0.06713	0.01226	0.14109	0.850514
ctx-lh-superiorfrontal	23752.1	2856.17	23751.3	2850.39	-0.73333	-0.00309	350.147	1.4742	63.9279	0.26915	-720	1151	-3.03136	4.84597	0	205.333	0.8645	281.048	1.18328	51.3122	0.21604	0	1151	0	4.84597	0.99272	0.96523	0.0224	0.00409	0.9328	0.04255	0.00777	0.99093	0.00396077
ctx-lh-superiorparietal	13995.7	2107.65	13938.6	2102.53	-57.1667	-0.40929	176.89	1.26647	32.2955	0.23122	-438	242	-3.13593	1.73264	0	124.5	0.89138	136.513	0.97739	24.9238	0.17845	0	438	0	3.13593	0.99622	0.95627	0.02893	0.00528	0.9162	0.05405	0.00987	0.08722	1.05937
ctx-lh-superiortemporal	12186.7	2002.77	12000.2	1775.51	-186.433	-1.54161	662.965	5.48202	121.04	1.00088	-3180	777	-26.2952	6.42497	0	307.367	2.5416	614.611	5.08218	112.212	0.92788	0	3180	0	26.2952	0.93593	0.94192	0.04078	0.00745	0.89022	0.07352	0.01342	0.13434	0.871798
ctx-lh-supramarginal	11146.4	1788.3	11158.1	1634.38	11.7	0.10491	524.333	4.70158	95.7297	0.85839	-859	2367	-7.70246	21.2244	0	257.5	2.30894	454.394	4.07445	82.9607	0.74389	0	2367	0	21.2244	0.95466	0.94928	0.04316	0.00788	0.90345	0.07545	0.01378	0.90357	0.0440375
ctx-lh-temporalpole	2014.1	356.567	1980.43	387.344	-33.6667	-1.68564	206.444	10.3363	37.6913	1.88715	-520	450	-26.0356	22.5308	0	143.867	7.20318	149.601	7.49026	27.3132	1.36753	0	520	0	26.0356	0.84719	0.8904	0.08617	0.01573	0.80245	0.13811	0.02522	0.37909	0.421257
ctx-lh-transversetemporal	1243.4	287.07	1247.27	278.296	3.86667	0.31049	52.0469	4.17935	9.50242	0.76304	-91	132	-7.30728	10.5996	0	35.1333	2.8212	38.0451	3.05501	6.94605	0.55777	0	132	0	10.5996	0.98352	0.91221	0.05873	0.01072	0.83858	0.1031	0.01882	0.68706	0.163008
ctx-rh-bankssts	2342.3	440.763	2385.17	421.65	42.8667	1.81352	180.838	7.65053	33.0164	1.39679	-176	890	-7.44585	37.6523	0	87	3.68062	163.626	6.92234	29.8738	1.26384	0	890	0	37.6523	0.91019	0.92406	0.06381	0.01165	0.85884	0.10581	0.01932	0.2044	0.689521
ctx-rh-caudalanteriorcingulate	2184.53	620.54	2160.07	602.891	-24.4667	-1.1263	111.388	5.12767	20.3366	0.93618	-271	356	-12.4753	16.3882	0	73.2667	3.37277	86.4495	3.97963	15.7834	0.72658	0	356	0	16.3882	0.98318	0.9269	0.05329	0.00973	0.86376	0.09345	0.01706	0.23867	0.622196
ctx-rh-caudalmiddlefrontal	6881.47	1460.27	6874.53	1484.04	-6.93333	-0.1008	247.425	3.59734	45.1734	0.65678	-849	590	-12.3437	8.57808	0	152.467	2.21673	192.928	2.805	35.2236	0.51212	0	849	0	12.3437	0.98633	0.9524	0.03603	0.00658	0.90913	0.06543	0.01194	0.87908	0.0559719
ctx-rh-cuneus	3168.7	511.249	3133.4	495.241	-35.3	-1.12026	91.0847	2.89061	16.6297	0.52775	-251	167	-7.9656	5.29982	-5	66.3667	2.10618	70.9159	2.25055	12.9474	0.41089	0	251	0	7.9656	0.98173	0.90771	0.06427	0.01173	0.83101	0.11055	0.02018	0.04244	1.37224
ctx-rh-entorhinal	1556.23	356.15	1618.2	395.834	61.9667	3.90411	194.244	12.238	35.4639	2.23435	-363	582	-22.8702	36.668	1	140.233	8.83517	146.149	9.20787	26.683	1.68112	0	582	0	36.668	0.85846	0.84326	0.14482	0.02644	0.72899	0.19547	0.03569	0.09117	1.04017
ctx-rh-frontalpole	867.367	152.809	875.067	195.207	7.7	0.88382	112.928	12.9622	20.6178	2.36656	-253	305	-29.0399	35.0085	0	77.0333	8.84204	81.7032	9.37806	14.9169	1.71219	0	305	0	35.0085	0.79784	0.89526	0.08001	0.01461	0.81038	0.13143	0.024	0.71152	0.147812
ctx-rh-fusiform	8648.9	1452.95	8617.6	1389.28	-31.3	-0.36255	416.276	4.82178	76.0013	0.88033	-1416	1015	-16.4017	11.7569	0	229.167	2.65447	346.368	4.01203	63.2379	0.73249	0	1416	0	16.4017	0.95828	0.9237	0.05989	0.01093	0.85822	0.10254	0.01872	0.68349	0.165271
ctx-rh-inferiorparietal	14636.7	2455.88	14711.2	2478.34	74.4667	0.50747	348.448	2.3746	63.6175	0.43354	-757	1204	-5.1588	8.20501	0	226.867	1.54605	271.862	1.85268	49.635	0.33825	0	1204	0	8.20501	0.9899	0.95763	0.02945	0.00538	0.91871	0.0548	0.01001	0.25131	0.599782
ctx-rh-inferiortemporal	9278.17	2731.73	9180.87	2745.19	-97.3	-1.05423	567.532	6.14909	103.617	1.12267	-2665	601	-28.8747	6.51172	0	289.1	3.13234	495.404	5.36761	90.448	0.97999	0	2665	0	28.8747	0.97861	0.92868	0.05791	0.01057	0.86686	0.09916	0.0181	0.35547	0.449199
ctx-rh-insula	6087.13	802.214	6069.7	802.81	-17.4333	-0.28681	108.931	1.7921	19.888	0.32719	-352	258	-5.79098	4.24453	0	65.9667	1.08526	87.6283	1.44163	15.9987	0.2632	0	352	0	5.79098	0.99086	0.9466	0.03561	0.0065	0.89862	0.06557	0.01197	0.38792	0.411255
ctx-rh-isthmuscingulate	2315.4	452.965	2301.67	446.533	-13.7333	-0.59489	155.567	6.73876	28.4024	1.23032	-542	465	-23.4781	20.1427	-0.5	76	3.29213	135.724	5.87921	24.7796	1.07339	0	542	0	23.4781	0.94166	0.8898	0.07835	0.01431	0.80148	0.12906	0.02356	0.63235	0.199042
ctx-rh-lateraloccipital	11432.6	1790.27	11438.7	1661.71	6.13333	0.05363	417.819	3.65366	76.2829	0.66706	-884	1525	-7.73022	13.3355	0	247.6	2.16516	333.454	2.91592	60.8801	0.53237	0	1525	0	13.3355	0.9717	0.94075	0.04489	0.0082	0.88813	0.0797	0.01455	0.93647	0.0285071
ctx-rh-lateralorbitofrontal	7471.67	1093.94	7478.53	1026.29	6.86667	0.09186	222.249	2.97319	40.5769	0.54283	-402	651	-5.37785	8.70891	0	148.733	1.98972	162.969	2.18016	29.754	0.39804	0	651	0	8.70891	0.97875	0.94323	0.03798	0.00693	0.89257	0.06939	0.01267	0.86679	0.0620824
ctx-rh-lingual	6366.43	909.72	6319.93	895.561	-46.5	-0.73307	204.079	3.2173	37.2596	0.5874	-465	526	-7.3307	8.29237	-36.5	134.3	2.11723	158.829	2.50393	28.9981	0.45715	0	526	0	8.29237	0.97397	0.92115	0.0522	0.00953	0.85382	0.09271	0.01693	0.22201	0.653622
ctx-rh-medialorbitofrontal	4766.77	787.587	4749.17	783.609	-17.6	-0.36991	203.809	4.28353	37.2103	0.78206	-434	727	-9.12154	15.2796	0	134.533	2.82754	152.103	3.1968	27.77	0.58365	0	727	0	15.2796	0.9672	0.92859	0.04843	0.00884	0.8667	0.0864	0.01577	0.63976	0.193982
ctx-rh-middletemporal	10928	1630.78	10809.8	1601.61	-118.233	-1.08781	398.776	3.66897	72.8063	0.66986	-1795	262	-16.515	2.41055	0	212.567	1.95574	356.007	3.27547	64.9977	0.59802	0	1795	0	16.515	0.96793	0.94175	0.04194	0.00766	0.88991	0.07502	0.0137	0.11521	0.938515
ctx-rh-paracentral	4616.73	789.904	4595.33	756.518	-21.4	-0.46461	139.356	3.02551	25.4428	0.55238	-536	156	-11.6369	3.38686	0	88.4	1.91922	108.673	2.35936	19.8409	0.43076	0	536	0	11.6369	0.98392	0.94794	0.03591	0.00656	0.90103	0.06594	0.01204	0.40717	0.390222
ctx-rh-parahippocampal	2143	333.188	2160.27	359.226	17.2667	0.80249	148.394	6.89679	27.0929	1.25918	-340	439	-15.8019	20.4031	0	94.4667	4.39046	114.444	5.31894	20.8945	0.9711	0	439	0	20.4031	0.91	0.90465	0.06704	0.01224	0.82589	0.11487	0.02097	0.52892	0.276611
ctx-rh-parsopercularis	4246.2	888.446	4242.8	940.154	-3.4	-0.0801	117.256	2.76254	21.4079	0.50437	-291	250	-6.85593	5.88998	0	80.1333	1.88793	84.3694	1.98773	15.4037	0.36291	0	291	0	6.85593	0.99205	0.94234	0.03815	0.00697	0.89097	0.06991	0.01276	0.87491	0.0580348
ctx-rh-parsorbitalis	2735.83	427.832	2751.57	405.656	15.7333	0.57343	133.495	4.86552	24.3728	0.88832	-245	321	-8.92955	11.6995	0	92	3.35314	96.5462	3.51883	17.6269	0.64245	0	321	0	11.6995	0.9497	0.92639	0.05308	0.00969	0.86287	0.09282	0.01695	0.52366	0.280949
ctx-rh-parstriangularis	4257.5	933.62	4243.83	897.265	-13.6667	-0.32152	142.88	3.36136	26.0862	0.6137	-290	286	-6.82246	6.72836	0	101.933	2.39806	99.2937	2.33596	18.1285	0.42649	0	290	0	6.82246	0.98812	0.94308	0.03803	0.00694	0.8923	0.06967	0.01272	0.60433	0.218728
ctx-rh-pericalcarine	2467.03	506.317	2511.17	504.697	44.1333	1.77306	134.859	5.41798	24.6218	0.98918	-269	384	-10.8071	15.4273	11.5	96.0667	3.85949	103.222	4.14697	18.8457	0.75713	0	384	0	15.4273	0.96184	0.90263	0.07006	0.01279	0.82254	0.11888	0.0217	0.0835	1.07831
ctx-rh-postcentral	9779.1	1496.78	9757.07	1456.16	-22.0333	-0.22556	130.093	1.33182	23.7517	0.24316	-325	187	-3.32716	1.9144	0	98.3	1.00634	86.1999	0.88246	15.7379	0.16112	0	325	0	3.32716	0.99614	0.95432	0.03123	0.0057	0.91262	0.05797	0.01058	0.36124	0.442199
ctx-rh-posteriorcingulate	3519.13	609.348	3515.8	627.196	-3.33333	-0.09477	74.0444	2.10505	13.5186	0.38433	-115	248	-3.2694	7.05053	-6	48.7333	1.38547	55.1111	1.56678	10.0619	0.28605	0	248	0	7.05053	0.99305	0.92265	0.05181	0.00946	0.85641	0.09229	0.01685	0.80698	0.0931388
ctx-rh-precentral	14003.2	1838.86	13981	1822.42	-22.2667	-0.15914	234.945	1.67912	42.8948	0.30656	-1090	280	-7.79011	2.00113	0	121.733	0.87001	200.952	1.43618	36.6887	0.26221	0	1090	0	7.79011	0.99196	0.96177	0.02768	0.00505	0.92635	0.05145	0.00939	0.60763	0.216361
ctx-rh-precuneus	10717.5	1713.58	10750.1	1687.11	32.6333	0.30402	219.014	2.04042	39.9864	0.37253	-689	512	-6.41899	4.76999	0	139.7	1.3015	169.941	1.58323	31.0268	0.28906	0	689	0	6.41899	0.9918	0.94677	0.03415	0.00624	0.89893	0.06322	0.01154	0.42109	0.375626
ctx-rh-rostralanteriorcingulate	1796.93	399.433	1802.43	418.867	5.5	0.30561	82.256	4.57058	15.0178	0.83447	-223	187	-12.3911	10.3907	0	53.1667	2.95422	62.2349	3.4581	11.3625	0.63136	0	223	0	12.3911	0.98038	0.91218	0.05809	0.01061	0.83854	0.10166	0.01856	0.71685	0.144572
ctx-rh-rostralmiddlefrontal	16500.5	3240.43	16431	3217.69	-69.5333	-0.42229	307.261	1.86606	56.0979	0.34069	-989	532	-6.00641	3.23095	-5	207.533	1.2604	234.212	1.42242	42.7611	0.2597	0	989	0	6.00641	0.99539	0.95459	0.03028	0.00553	0.91313	0.05639	0.0103	0.2251	0.647629
ctx-rh-superiorfrontal	23658.4	3772.13	23669.6	3718.39	11.2333	0.04747	263.869	1.11506	48.1757	0.20358	-685	525	-2.89469	2.21856	0	180.5	0.76276	189.878	0.80239	34.6668	0.1465	0	685	0	2.89469	0.9976	0.96659	0.02181	0.00398	0.93533	0.04146	0.00757	0.81726	0.0876363
ctx-rh-superiorparietal	14105.1	2188.34	14131.2	2281.76	26.1	0.18487	185.113	1.31117	33.7968	0.23939	-446	490	-3.15905	3.47071	0	117.567	0.83273	143.781	1.01841	26.2507	0.18594	0	490	0	3.47071	0.99662	0.95787	0.02759	0.00504	0.91915	0.05177	0.00945	0.44621	0.350463
ctx-rh-superiortemporal	11390.9	1680.49	11491.4	1743.97	100.5	0.87841	250.56	2.18998	45.7457	0.39983	-237	947	-2.07146	8.27712	0	168.9	1.47625	209.088	1.8275	38.1741	0.33365	0	947	0	8.27712	0.98794	0.95647	0.02874	0.00525	0.91658	0.05381	0.00982	0.03617	1.44168
ctx-rh-supramarginal	10483	1625.84	10458.5	1591.09	-24.5	-0.23398	270.194	2.58046	49.3305	0.47112	-726	634	-6.93358	6.05494	0	183.033	1.74804	197.407	1.88531	36.0414	0.34421	0	726	0	6.93358	0.98624	0.95264	0.03271	0.00597	0.90957	0.06043	0.01103	0.62318	0.205387
ctx-rh-temporalpole	1914.03	430.739	1870.6	487.674	-43.4333	-2.29525	226.645	11.9771	41.3795	2.18671	-552	693	-29.1706	36.6218	0	143.967	7.60796	178.545	9.43527	32.5977	1.72264	0	693	0	36.6218	0.87828	0.87362	0.1146	0.02092	0.7756	0.17235	0.03147	0.30256	0.519195
ctx-rh-transversetemporal	916.467	211.647	909.5	205.205	-6.96667	-0.76307	65.027	7.12248	11.8723	1.30038	-210	139	-23.0015	15.2248	0	42.0333	4.60395	49.5076	5.42261	9.0388	0.99003	0	210	0	23.0015	0.95238	0.9048	0.06605	0.01206	0.82615	0.11334	0.02069	0.56188	0.250358
wm-lh-bankssts	2796.1	565.526	2786.47	536.993	-9.63333	-0.34512	132.543	4.74845	24.1989	0.86694	-301	398	-10.7836	14.2587	0	83.1667	2.97951	102.51	3.67251	18.7157	0.67051	0	398	0	14.2587	0.97191	0.94481	0.04326	0.0079	0.89539	0.07697	0.01405	0.69348	0.158965
wm-lh-caudalanteriorcingulate	2622.3	488.642	2632.33	501.099	10.0333	0.38189	171.964	6.54523	31.3961	1.19499	-252	615	-9.59154	23.4079	0	107.167	4.07894	133.398	5.07734	24.355	0.92699	0	615	0	23.4079	0.94139	0.93472	0.05166	0.00943	0.87744	0.0899	0.01641	0.75158	0.124021
wm-lh-caudalmiddlefrontal	6710.03	882.824	6621.1	870.05	-88.9333	-1.33422	217.679	3.26573	39.7426	0.59624	-582	341	-8.73144	5.11584	-58	156.267	2.34439	174.083	2.61167	31.783	0.47682	0	582	0	8.73144	0.96511	0.94275	0.05404	0.00987	0.8917	0.08922	0.01629	0.03309	1.48036
wm-lh-cuneus	2263.13	306.039	2207.57	271.102	-55.5667	-2.48582	207.147	9.26686	37.8197	1.69189	-721	421	-32.2545	18.8337	0	122.833	5.49504	174.63	7.81219	31.8829	1.4263	0	721	0	32.2545	0.7347	0.91452	0.07435	0.01357	0.8425	0.12047	0.02199	0.15253	0.816647
wm-lh-entorhinal	770.233	232.146	767.8	234.054	-2.43333	-0.31642	87.2471	11.3453	15.9291	2.07135	-210	229	-27.3076	29.7783	0	59.7667	7.77183	62.6334	8.14461	11.4352	1.487	0	229	0	29.7783	0.93216	0.89513	0.10629	0.01941	0.81016	0.15491	0.02828	0.87964	0.0556939
wm-lh-frontalpole	153.767	37.9543	154.633	44.3267	0.86667	0.56204	20.6761	13.4086	3.77491	2.44806	-38	68	-24.6433	44.0986	0	13.2667	8.60355	15.6908	10.1756	2.86474	1.85781	0	68	0	44.0986	0.87819	0.86597	0.09544	0.01743	0.76363	0.15256	0.02785	0.82003	0.0861727
wm-lh-fusiform	6255.23	1117.47	6328	1097.7	72.7667	1.15657	228.266	3.62809	41.6754	0.6624	-364	675	-5.78548	10.7286	0	165.1	2.62413	171.42	2.72458	31.2969	0.49744	0	675	0	10.7286	0.97733	0.93494	0.04858	0.00887	0.87782	0.0863	0.01576	0.09139	1.03909
wm-lh-inferiorparietal	9152.8	1359.13	9052.17	1350.45	-100.633	-1.10556	395.309	4.34287	72.1732	0.7929	-1441	925	-15.8308	10.1621	0	230.967	2.5374	334.006	3.6694	60.9809	0.66994	0	1441	0	15.8308	0.95612	0.95622	0.03049	0.00557	0.9161	0.05644	0.0103	0.17381	0.759928
wm-lh-inferiortemporal	5434.73	804.696	5566.67	1015.24	131.933	2.39848	500.035	9.09039	91.2935	1.65967	-486	2516	-8.83524	45.7396	0	230.4	4.18856	461.657	8.3927	84.2867	1.53229	0	2516	0	45.7396	0.84603	0.92093	0.06447	0.01177	0.85344	0.1084	0.01979	0.15913	0.798238
wm-lh-insula	8954.3	1082.55	8893	1036.09	-61.3	-0.68694	196.351	2.20034	35.8486	0.40173	-463	334	-5.18846	3.74286	0	143.367	1.60659	145.527	1.6308	26.5695	0.29774	0	463	0	5.18846	0.98174	0.94777	0.03746	0.00684	0.90073	0.06807	0.01243	0.09795	1.00899
wm-lh-isthmuscingulate	3102.2	456.029	3129.27	479.054	27.0667	0.86871	133.642	4.28925	24.3995	0.78311	-283	324	-9.08293	10.3988	0	91.4667	2.93564	99.8163	3.20362	18.2239	0.5849	0	324	0	10.3988	0.95887	0.92996	0.0483	0.00882	0.86908	0.0863	0.01576	0.27641	0.558446
wm-lh-lateraloccipital	8404.67	1539.71	8461.07	1637.86	56.4	0.66881	606.276	7.18944	110.69	1.31261	-655	2888	-7.76723	34.2469	0	303.8	3.60257	524.77	6.22292	95.8095	1.13614	0	2888	0	34.2469	0.92899	0.93989	0.04945	0.00903	0.88659	0.08586	0.01568	0.61424	0.211662
wm-lh-lateralorbitofrontal	6749.77	754.179	6748.43	760.847	-1.33333	-0.01976	172.719	2.55914	31.5341	0.46723	-308	389	-4.56357	5.76373	0	116.6	1.72764	125.576	1.86063	22.927	0.3397	0	389	0	5.76373	0.97486	0.96071	0.02585	0.00472	0.92438	0.04865	0.00888	0.96656	0.0147704
wm-lh-lingual	5353.53	803.075	5334.17	748.246	-19.3667	-0.36241	388.574	7.27142	70.9435	1.32757	-1111	1410	-20.7903	26.3855	0	217.433	4.06885	320.109	5.99024	58.4437	1.09366	0	1410	0	26.3855	0.87831	0.92745	0.05733	0.01047	0.86472	0.09767	0.01783	0.7868	0.104135
wm-lh-medialorbitofrontal	3041.87	528.156	3016.67	525.744	-25.2	-0.83188	152.814	5.0446	27.9	0.92101	-334	359	-11.0258	11.8511	0	102.2	3.37375	114.909	3.79331	20.9795	0.69256	0	359	0	11.8511	0.9582	0.94159	0.04025	0.00735	0.88963	0.07277	0.01329	0.37385	0.427307
wm-lh-middletemporal	4764.73	1039.27	4663.3	881.07	-101.433	-2.15174	305.607	6.48293	55.7959	1.18362	-1254	486	-26.6015	10.3097	0	187.633	3.98033	260.036	5.51622	47.4758	1.00712	0	1254	0	26.6015	0.94593	0.90803	0.08006	0.01462	0.83155	0.12784	0.02334	0.07942	1.10008
wm-lh-paracentral	4186.43	693.609	4150.83	722.884	-35.6	-0.854	178.032	4.27076	32.5041	0.77973	-704	230	-16.888	5.5174	0	116.2	2.78748	137.98	3.30997	25.1916	0.60431	0	704	0	16.888	0.96821	0.95418	0.03595	0.00656	0.91238	0.06454	0.01178	0.28242	0.5491
wm-lh-parahippocampal	1607.23	341.281	1628.87	350.267	21.6333	1.337	104.587	6.46377	19.0949	1.18012	-179	326	-11.0627	20.1477	0	71.7667	4.43538	78.0675	4.82479	14.2531	0.88088	0	326	0	20.1477	0.95384	0.92053	0.05591	0.01021	0.85276	0.09762	0.01782	0.26652	0.574268
wm-lh-parsopercularis	3760.97	617.21	3748.63	581.261	-12.3333	-0.32847	147.355	3.92445	26.9032	0.7165	-351	399	-9.34803	10.6264	0	96.7333	2.57626	110.412	2.94057	20.1584	0.53687	0	399	0	10.6264	0.97058	0.94146	0.04287	0.00783	0.8894	0.07673	0.01401	0.65006	0.187046
wm-lh-parsorbitalis	959.733	275.881	966.933	259.427	7.2	0.7474	103.653	10.7598	18.9243	1.96446	-200	414	-20.7613	42.9758	0	52.9333	5.49481	88.8761	9.22589	16.2265	1.68441	0	414	0	42.9758	0.92714	0.92592	0.05498	0.01004	0.86205	0.09479	0.01731	0.70637	0.150965
wm-lh-parstriangularis	2989.4	579.97	2932.9	575.2	-56.5	-1.90804	256.204	8.65216	46.7762	1.57966	-693	528	-23.4031	17.8309	0	154.5	5.21757	210.355	7.10383	38.4054	1.29698	0	693	0	23.4031	0.90019	0.92299	0.06491	0.01185	0.85699	0.10953	0.02	0.23685	0.625523
wm-lh-pericalcarine	3004.77	562.29	2968.77	552.132	-36	-1.20532	250.922	8.40113	45.8119	1.53383	-783	682	-26.2156	22.8341	0	158.067	5.29223	196.102	6.5657	35.8032	1.19873	0	783	0	26.2156	0.89984	0.91802	0.07227	0.01319	0.84846	0.11621	0.02122	0.43835	0.358184
wm-lh-postcentral	6966.5	1053.82	7024.93	999.127	58.4333	0.83527	240.247	3.43419	43.8628	0.627	-440	768	-6.28956	10.9781	0	170.3	2.43435	176.772	2.52686	32.2741	0.46134	0	768	0	10.9781	0.97193	0.94482	0.03842	0.00701	0.89541	0.07007	0.01279	0.19317	0.71405
wm-lh-posteriorcingulate	4602.23	725.511	4611.53	672.745	9.3	0.20187	172.513	3.74469	31.4965	0.68368	-311	401	-6.75077	8.70437	0	125.367	2.72129	116.583	2.53062	21.285	0.46203	0	401	0	8.70437	0.97051	0.95221	0.03266	0.00596	0.90878	0.06048	0.01104	0.76989	0.113572
wm-lh-precentral	13176.7	1831.14	13299.7	1907.49	123.067	0.92963	422.027	3.18795	77.0512	0.58204	-479	1853	-3.61832	13.9974	17	213.2	1.61049	383.083	2.89377	69.9411	0.52833	0	1853	0	13.9974	0.97323	0.96051	0.0302	0.00551	0.92402	0.05498	0.01004	0.12106	0.917
wm-lh-precuneus	9376.1	1302.99	9334.9	1318.3	-41.2	-0.44038	210.992	2.25527	38.5216	0.41175	-537	427	-5.73994	4.56416	0	148.933	1.59193	152.733	1.63255	27.8851	0.29806	0	537	0	5.73994	0.98698	0.96428	0.02371	0.00433	0.93102	0.04484	0.00819	0.29365	0.532167
wm-lh-rostralanteriorcingulate	2149.4	412.895	2188.97	406.2	39.5667	1.82404	94.9638	4.37786	17.3379	0.79928	-243	200	-11.2024	9.22006	13	71.9	3.31461	72.7307	3.3529	13.2787	0.61215	0	243	0	11.2024	0.96941	0.93342	0.04754	0.00868	0.87516	0.08495	0.01551	0.03001	1.52279
wm-lh-rostralmiddlefrontal	11926	2662.47	12017	2641.83	91.0333	0.76042	320.003	2.67304	58.4242	0.48803	-539	995	-4.50237	8.31142	2	213.233	1.78118	252.86	2.11219	46.1657	0.38563	0	995	0	8.31142	0.99238	0.96156	0.02988	0.00546	0.92596	0.05516	0.01007	0.13005	0.8859
wm-lh-superiorfrontal	17983.9	2641.14	18014.5	2709.61	30.6333	0.17019	327.676	1.8205	59.8252	0.33238	-844	877	-4.68909	4.87243	0	198.433	1.10246	260.017	1.4446	47.4724	0.26375	0	877	0	4.87243	0.99268	0.9679	0.02112	0.00386	0.93779	0.0402	0.00734	0.6125	0.212895
wm-lh-superiorparietal	11337	1563.67	11334.1	1647.67	-2.86667	-0.02529	255.008	2.24963	46.5579	0.41072	-733	606	-6.46637	5.34601	7	159.4	1.40619	196.859	1.73664	35.9413	0.31707	0	733	0	6.46637	0.98781	0.96201	0.02673	0.00488	0.9268	0.04994	0.00912	0.95133	0.0216713
wm-lh-superiortemporal	7329.3	1470.65	7265.53	1292.38	-63.7667	-0.87383	384.597	5.27032	70.2175	0.96222	-1639	337	-22.46	4.61807	0	202.767	2.77861	331.042	4.53643	60.4398	0.82824	0	1639	0	22.46	0.96163	0.94414	0.03999	0.0073	0.89419	0.07234	0.01321	0.37129	0.430282
wm-lh-supramarginal	8207.2	1313.26	8224.53	1206.65	17.3333	0.21097	317.43	3.86363	57.9546	0.7054	-551	1148	-6.70654	13.973	0	176.467	2.14788	262.409	3.19393	47.9091	0.58313	0	1148	0	13.973	0.96927	0.95413	0.04061	0.00741	0.91229	0.07092	0.01295	0.76701	0.115201
wm-lh-temporalpole	489.3	141.193	479.5	126.555	-9.8	-2.02312	38.7133	7.992	7.06804	1.45913	-145	66	-29.9339	13.6251	0	24.5333	5.06468	31.2319	6.44754	5.70213	1.17715	0	145	0	29.9339	0.95706	0.86939	0.09679	0.01767	0.76896	0.15233	0.02781	0.17616	0.754105
wm-lh-transversetemporal	718.667	178.013	719.9	181.477	1.23333	0.17147	69.4742	9.65881	12.6842	1.76345	-178	168	-24.7468	23.3566	0	45.5	6.32574	51.8325	7.20612	9.46327	1.31565	0	178	0	24.7468	0.92769	0.89812	0.07093	0.01295	0.81507	0.12025	0.02196	0.92321	0.0347001
wm-rh-bankssts	2880.8	477.479	2888.63	477.489	7.83333	0.27155	162.466	5.63195	29.6621	1.02825	-204	745	-7.07175	25.8258	0	81.9	2.8391	139.713	4.84322	25.508	0.88425	0	745	0	25.8258	0.94386	0.95152	0.04321	0.00789	0.90752	0.07514	0.01372	0.79358	0.100409
wm-rh-caudalanteriorcingulate	2686.47	583.366	2658.27	550.981	-28.2	-1.05524	129.859	4.85932	23.7089	0.88719	-358	249	-13.3964	9.31758	0	91.0667	3.40772	95.43	3.57099	17.4231	0.65197	0	358	0	13.3964	0.97345	0.94296	0.03914	0.00715	0.89207	0.07145	0.01305	0.24392	0.612755
wm-rh-caudalmiddlefrontal	5953.5	1122.31	6004.33	1148.37	50.8333	0.85021	219.678	3.6742	40.1074	0.67081	-525	576	-8.78085	9.63385	15	145.5	2.43355	170.385	2.84977	31.1079	0.52029	0	576	0	9.63385	0.98091	0.95064	0.03638	0.00664	0.90592	0.06623	0.01209	0.21509	0.667389
wm-rh-cuneus	2248.43	370.966	2226.63	331.198	-21.8	-0.97429	109.376	4.88824	19.9692	0.89247	-234	336	-10.4579	15.0165	0	72.4	3.23571	83.8585	3.74781	15.3104	0.68425	0	336	0	15.0165	0.95132	0.93456	0.04818	0.0088	0.87715	0.08492	0.0155	0.28396	0.546742
wm-rh-entorhinal	633.167	173.675	634.233	171.222	1.06667	0.16832	99.658	15.7264	18.195	2.87123	-297	227	-46.8676	35.8214	0	59.8667	9.44716	78.9005	12.4508	14.4052	2.27319	0	297	0	46.8676	0.83812	0.86471	0.1285	0.02346	0.76166	0.18694	0.03413	0.95365	0.0206073
wm-rh-frontalpole	202.267	43.4312	199.833	61.0196	-2.43333	-1.21031	32.178	16.005	5.87488	2.9221	-73	81	-36.3094	40.2885	0	21.2333	10.5612	23.9823	11.9285	4.37855	2.17784	0	81	0	40.2885	0.82006	0.86496	0.10501	0.01917	0.76205	0.16246	0.02966	0.68178	0.166357
wm-rh-fusiform	6094	994.893	6091.9	991.839	-2.1	-0.03447	208.254	3.41795	38.0218	0.62403	-453	508	-7.43482	8.3375	0	138.433	2.27202	153.459	2.51863	28.0176	0.45984	0	508	0	8.3375	0.97875	0.93819	0.04889	0.00893	0.88357	0.08542	0.0156	0.95633	0.0193912
wm-rh-inferiorparietal	10805.7	1492.74	10900.2	1489.93	94.4333	0.87012	276.17	2.54466	50.4216	0.46459	-626	623	-5.76802	5.74037	10.5	204.833	1.88735	205.163	1.89039	37.4574	0.34514	0	626	0	5.76802	0.98143	0.96352	0.0255	0.00466	0.92961	0.04793	0.00875	0.0712	1.14753
wm-rh-inferiortemporal	5250.9	1186.57	5212.7	1190.07	-38.2	-0.73015	266.492	5.0937	48.6546	0.92998	-1111	384	-21.2355	7.33973	0	152	2.90531	220.515	4.2149	40.2604	0.76953	0	1111	0	21.2355	0.97517	0.93367	0.05506	0.01005	0.87559	0.09418	0.01719	0.43875	0.357785
wm-rh-insula	8580.9	1053.85	8557	1027.51	-23.9	-0.27891	243.524	2.84193	44.4612	0.51886	-673	668	-7.85394	7.79559	0	160.567	1.87382	182.275	2.12715	33.2786	0.38836	0	673	0	7.85394	0.97327	0.94976	0.03466	0.00633	0.90432	0.06382	0.01165	0.59499	0.22549
wm-rh-isthmuscingulate	3001	435.781	3013.63	436.131	12.6333	0.42009	137.053	4.55733	25.0224	0.83205	-171	396	-5.68613	13.1679	0	88.5	2.94282	104.146	3.46309	19.0144	0.63227	0	396	0	13.1679	0.95178	0.92781	0.0536	0.00979	0.86535	0.09263	0.01691	0.61746	0.209391
wm-rh-lateraloccipital	8363.9	1359.18	8413.87	1234.06	49.9667	0.59563	376.734	4.49087	68.7819	0.81992	-526	1476	-6.2702	17.5947	0	227.833	2.7159	301.352	3.59228	55.0192	0.65586	0	1476	0	17.5947	0.95854	0.95049	0.03978	0.00726	0.90565	0.07061	0.01289	0.47339	0.324783
wm-rh-lateralorbitofrontal	6528.53	934.131	6524.07	898.301	-4.46667	-0.06844	200.323	3.06948	36.5739	0.56041	-385	555	-5.89921	8.50405	0	132.467	2.02974	148.316	2.27259	27.0787	0.41492	0	555	0	8.50405	0.97688	0.9575	0.02927	0.00534	0.91846	0.0544	0.00993	0.90364	0.0440027
wm-rh-lingual	5339.97	828.405	5318.17	843.038	-21.8	-0.40908	170.458	3.19865	31.1213	0.58399	-370	438	-6.94305	8.21908	0	115.333	2.16423	125.647	2.35777	22.9399	0.43047	0	438	0	8.21908	0.97955	0.93532	0.04807	0.00878	0.8785	0.08493	0.01551	0.48921	0.310508
wm-rh-medialorbitofrontal	3205.2	532.067	3209.27	530.54	4.06667	0.1268	97.7326	3.04725	17.8434	0.55635	-187	211	-5.83057	6.57888	0	67	2.08903	70.1781	2.18812	12.8127	0.39949	0	211	0	6.57888	0.98361	0.95235	0.03222	0.00588	0.90903	0.05961	0.01088	0.82132	0.0854909
wm-rh-middletemporal	5424.9	882.303	5371.93	929.68	-52.9667	-0.98115	216.605	4.01238	39.5465	0.73256	-1006	239	-18.6351	4.42722	0	117.5	2.17656	188.514	3.49203	34.4178	0.63755	0	1006	0	18.6351	0.9707	0.93815	0.04618	0.00843	0.88351	0.08154	0.01489	0.19086	0.719287
wm-rh-paracentral	5176.73	856.205	5210.03	849.333	33.3	0.6412	144.558	2.78351	26.3926	0.5082	-469	282	-9.03072	5.42999	7.5	98.8333	1.90306	109.267	2.10397	19.9494	0.38413	0	469	0	9.03072	0.98535	0.96005	0.03065	0.0056	0.92317	0.05673	0.01036	0.2171	0.663333
wm-rh-parahippocampal	1684.3	369.785	1699.7	332.078	15.4	0.91017	103.426	6.11263	18.8829	1.11601	-183	266	-10.8156	15.721	0	69.2	4.08983	77.385	4.57358	14.1285	0.83502	0	266	0	15.721	0.95717	0.92959	0.07755	0.01416	0.86844	0.11944	0.02181	0.4214	0.375304
wm-rh-parsopercularis	3439.43	730.681	3442.53	765.773	3.1	0.09009	156.74	4.5551	28.6167	0.83164	-378	293	-10.9852	8.51501	0	112.9	3.28104	106.731	3.10175	19.4863	0.5663	0	378	0	10.9852	0.97879	0.93961	0.04318	0.00788	0.88609	0.0777	0.01419	0.91448	0.0388259
wm-rh-parsorbitalis	1131.17	247.693	1162.8	282.762	31.6333	2.75796	109.545	9.55073	20.0001	1.74372	-181	350	-15.7805	30.5148	0	74.3667	6.48367	85.5233	7.45637	15.6143	1.36134	0	350	0	30.5148	0.91102	0.92024	0.05776	0.01054	0.85226	0.10009	0.01827	0.12457	0.90457
wm-rh-parstriangularis	3166	745.11	3132.47	685.044	-33.5333	-1.06481	172.855	5.48879	31.5588	1.00211	-526	535	-16.7025	16.9883	-1	110.133	3.49715	135.994	4.31833	24.8291	0.78842	0	535	0	16.9883	0.97071	0.94224	0.04205	0.00768	0.89079	0.07575	0.01383	0.29675	0.527611
wm-rh-pericalcarine	3351.33	712.81	3409.13	754.539	57.8	1.70994	202.59	5.99337	36.9877	1.09424	-356	782	-10.5318	23.1345	0	130.067	3.84786	164.311	4.86093	29.9989	0.88748	0	782	0	23.1345	0.96011	0.92767	0.05578	0.01018	0.86509	0.09569	0.01747	0.12898	0.889492
wm-rh-postcentral	6866.03	1095.6	6902.5	1090.28	36.4667	0.52971	159.643	2.31895	29.1467	0.42338	-429	395	-6.2316	5.73772	0	107.267	1.55814	122.305	1.77659	22.3298	0.32436	0	429	0	6.2316	0.98913	0.94589	0.03944	0.0072	0.89734	0.07142	0.01304	0.22088	0.655841
wm-rh-posteriorcingulate	4243.5	645.185	4215.87	631.948	-27.6333	-0.65332	131.797	3.11601	24.0628	0.5689	-367	251	-8.67677	5.93425	0	94.4333	2.23263	94.5267	2.23484	17.2581	0.40802	0	367	0	8.67677	0.97848	0.94985	0.03324	0.00607	0.90449	0.06154	0.01124	0.26019	0.584704
wm-rh-precentral	13350.5	1882.86	13346.6	1866.04	-3.9	-0.02922	175.915	1.31786	32.1176	0.24061	-509	241	-3.81315	1.80544	0	116.1	0.86976	130.453	0.97728	23.8173	0.17843	0	509	0	3.81315	0.99574	0.96572	0.02444	0.00446	0.9337	0.04588	0.00838	0.90419	0.0437421
wm-rh-precuneus	9911.5	1389.32	9976.07	1419.5	64.5667	0.64932	293.533	2.95193	53.5916	0.53895	-577	1103	-5.80262	11.0924	8	172.5	1.73475	244.32	2.45701	44.6065	0.44859	0	1103	0	11.0924	0.97784	0.96306	0.02543	0.00464	0.92875	0.04777	0.00872	0.23802	0.623378
wm-rh-rostralanteriorcingulate	1587.53	247.344	1578.87	259.658	-8.66667	-0.54741	87.9386	5.55448	16.0553	1.01411	-293	178	-18.5068	11.2431	0	54.2667	3.42766	69.0252	4.35985	12.6022	0.796	0	293	0	18.5068	0.94125	0.93098	0.04793	0.00875	0.87088	0.08558	0.01562	0.59346	0.226611
wm-rh-rostralmiddlefrontal	12267.4	2750.96	12221.3	2758.5	-46.1333	-0.37677	197.368	1.61191	36.0343	0.29429	-680	301	-5.55359	2.45828	0	125.067	1.02142	158.034	1.29067	28.8529	0.23564	0	680	0	5.55359	0.99738	0.96592	0.02428	0.00443	0.93408	0.04563	0.00833	0.2106	0.676544
wm-rh-superiorfrontal	18107.3	2602.17	18100.8	2619.22	-6.56667	-0.03627	307.211	1.69692	56.0889	0.30981	-579	1167	-3.19818	6.44607	0	190.367	1.05151	238.609	1.31799	43.5639	0.24063	0	1167	0	6.44607	0.9933	0.97178	0.01818	0.00332	0.94512	0.03485	0.00636	0.90761	0.0421005
wm-rh-superiorparietal	11134.7	1847.74	11134.5	1776	-0.26667	-0.00239	226.778	2.0367	41.4038	0.37185	-669	427	-6.0083	3.83489	0	144.933	1.30165	172.332	1.54771	31.4633	0.28257	0	669	0	6.0083	0.99243	0.96234	0.02534	0.00463	0.92742	0.0478	0.00873	0.99491	0.00221924
wm-rh-superiortemporal	6260.13	978.398	6321.1	982.829	60.9667	0.96917	205.552	3.2676	37.5286	0.59658	-389	922	-6.18381	14.6568	6.5	109.567	1.74175	183.516	2.9173	33.5053	0.53262	0	922	0	14.6568	0.97684	0.95063	0.03518	0.00642	0.9059	0.06441	0.01176	0.11508	0.938992
wm-rh-supramarginal	8496.43	1303.5	8454.47	1343.48	-41.9667	-0.49516	229.899	2.71253	41.9736	0.49524	-519	582	-6.12357	6.86689	0	162.1	1.91258	165.81	1.95636	30.2726	0.35718	0	582	0	6.86689	0.98492	0.96201	0.02656	0.00485	0.92679	0.04976	0.00908	0.32566	0.487235
wm-rh-temporalpole	548.467	170.638	554.367	192.241	5.9	1.06997	123.631	22.4207	22.5719	4.09344	-367	410	-66.5558	74.3539	0	69.4333	12.5918	101.654	18.435	18.5594	3.36576	0	410	0	74.3539	0.77505	0.85477	0.12458	0.02274	0.74637	0.18505	0.03378	0.79564	0.0992841
wm-rh-transversetemporal	507.067	143.606	495.033	136.589	-12.0333	-2.40162	48.5212	9.68391	8.85872	1.76803	-145	80	-28.9392	15.9665	0	32.8333	6.55291	37.268	7.43798	6.80417	1.35798	0	145	0	28.9392	0.93843	0.88009	0.09065	0.01655	0.78585	0.14616	0.02669	0.18482	0.733241
Brain Mask Volume	1582745	148440	1582745	148440	0	0	0	0	0	0	0	0	0	0	0	0	0	0	0	0	0	0	0	0	0	1	1	0	0	1	0	0	1	0
Brain Segmentation Volume	1.17334e+06	139781	1.17327e+06	139179	-69.7333	-0.00594	2453.81	0.20914	448.002	0.03818	-7898	6090	-0.67314	0.51905	0	1362.13	0.11609	2026.53	0.17272	369.991	0.03153	0	7898	0	0.67314	0.99985	0.99511	0.00451	0.00082	0.99027	0.00889	0.00162	0.87738	0.0568101
Brain Segmentation Volume Without Ventricles	1.15327e+06	140385	1.1532e+06	139865	-72.6667	-0.0063	2435.11	0.21116	444.588	0.03855	-7845	5771	-0.68026	0.50042	0	1361.07	0.11802	2004.71	0.17383	366.007	0.03174	0	7845	0	0.68026	0.99985	0.99485	0.00486	0.00089	0.98975	0.00957	0.00175	0.8713	0.0598328
Ventricles	17253	10350	17257	10334.3	4.06667	0.02357	90.8249	0.52637	16.5823	0.0961	-376	200	-2.17908	1.15908	0	47.8	0.27702	76.8287	0.44525	14.0269	0.08129	0	376	0	2.17908	0.99996	0.98562	0.01647	0.00301	0.97165	0.0313	0.00572	0.808	0.0925916
Left Medial-inferior Temporal Gyrus	29281.6	4723.76	29348.7	5035.13	67.1333	0.22901	1055.22	3.59958	192.656	0.65719	-2930	3782	-9.99484	12.9012	0	588.4	2.00715	871.782	2.97383	159.165	0.54294	0	3782	0	12.9012	0.97732	0.95381	0.0333	0.00608	0.91169	0.06135	0.0112	0.73001	0.136672
Right Medial-inferior Temporal Gyrus	30882	5812.08	30575.3	5788.5	-306.7	-0.99809	1136.51	3.69854	207.498	0.67526	-4298	1222	-13.987	3.97675	0	573.3	1.86569	1024.19	3.33301	186.99	0.60852	0	4298	0	13.987	0.98005	0.95966	0.03083	0.00563	0.92245	0.05675	0.01036	0.15016	0.823435
Left Superior Temporal Gyrus	19516	3304.22	19265.8	2840.7	-250.2	-1.2903	1026.27	5.29255	187.371	0.96628	-4819	983	-24.8519	5.0694	0	474.133	2.44514	940.977	4.85268	171.798	0.88597	0	4819	0	24.8519	0.94312	0.94976	0.03597	0.00657	0.90433	0.06546	0.01195	0.19216	0.716338
Right Superior Temporal Gyrus	17651.1	2455.41	17812.5	2519.91	161.467	0.91061	397.091	2.23943	72.4985	0.40886	-585	1264	-3.29916	7.12844	0	271.867	1.53322	328.924	1.855	60.0531	0.33867	0	1264	0	7.12844	0.98559	0.96108	0.02615	0.00477	0.92507	0.04915	0.00897	0.03386	1.47032
Left Temporal Lobe	80563.1	10934.6	80636.6	10991.5	73.5	0.09119	1153.69	1.43138	210.635	0.26133	-2276	3028	-2.82383	3.75683	0	828.033	1.02734	792.033	0.98267	144.605	0.17941	0	3028	0	3.75683	0.99462	0.97006	0.02156	0.00394	0.94187	0.04088	0.00746	0.72965	0.136885
Right Temporal Lobe	79173.7	11391.3	79033.1	11469.7	-140.533	-0.17766	1351.7	1.70878	246.786	0.31198	-4507	1879	-5.69761	2.37537	0	822.733	1.04007	1071.12	1.35407	195.558	0.24722	0	4507	0	5.69761	0.99317	0.97174	0.02087	0.00381	0.94502	0.03952	0.00721	0.57343	0.24152
v4.3.1 vs. v5.0.0
Struct	Mean1	sd1	Mean2	sd2	Mean diff	Mean diff %	sd Diff	sd Diff %	se Diff	se Diff %	min Diff	max Diff	min Diff %	max Diff %	median	Mean AbsDiff	Mean AbsDiff %	sd AbsDiff	sd AbsDiff %	se AbsDiff	se AbsDiff %	min AbsDiff	max AbsDiff	min AbsDiff %	max AbsDiff %	ICC(1,1)	SI	sd SI	se SI	OR	sd OR	se OR	p	-log10(p)
3rd-Ventricle	958	447.312	975.767	445.744	17.7667	1.83752	88.0841	9.1101	16.0819	1.66327	-189	281	-19.5473	29.0624	25	63.4333	6.5606	62.6323	6.47775	11.435	1.18267	1	281	0.10343	29.0624	0.9804	0.93807	0.04305	0.00786	0.88336	0.07103	0.01297	0.27834	0.555419
4th-Ventricle	1856.17	748.656	1951.37	750.084	95.2	5.00061	127.63	6.7041	23.302	1.224	-139	375	-7.30131	19.6978	69	119.467	6.27528	104.406	5.4842	19.0619	1.00127	2	375	0.10505	19.6978	0.97799	0.92529	0.02966	0.00542	0.86096	0.04827	0.00881	0.00032	3.49889
5th-Ventricle	6.43333	8.47993	4.76667	6.43098	-1.66667	-29.7619	4.79463	85.6184	0.87538	15.6317	-16	8	-285.714	142.857	0	3.33333	59.5238	3.79049	67.6873	0.69205	12.358	0	16	0	285.714	0.78122	0.56548	0.35558	0.06492	0.39419	0.30554	0.05578	0.06688	1.17468
Brain-Stem	18117	2213.02	18801.8	2427.54	684.833	3.70994	564.157	3.0562	103.001	0.55798	-586	2261	-3.17453	12.2485	668	755.9	4.09493	460.82	2.49639	84.1338	0.45578	78	2261	0.42255	12.2485	0.92952	0.95134	0.00942	0.00172	0.9072	0.01704	0.00311	0	6.52575
CC_Anterior	963.233	172.333	913.867	171.055	-49.3667	-5.25989	59.2967	6.31791	10.8261	1.15349	-242	48	-25.7844	5.11427	-35.5	55.5	5.91338	53.3923	5.68881	9.74806	1.03863	4	242	0.42619	25.7844	0.90293	0.88037	0.06605	0.01206	0.7863	0.10462	0.0191	9e-05	4.06545
CC_Central	484.8	122.549	438.033	89.4016	-46.7667	-10.1355	59.1186	12.8124	10.7935	2.33922	-249	1	-53.9642	0.21672	-27	46.8333	10.1499	59.064	12.8006	10.7836	2.33706	1	249	0.21672	53.9642	0.76854	0.86986	0.06808	0.01243	0.76969	0.10705	0.01954	0.00016	3.79319
CC_Mid_Anterior	512.967	131.976	476.367	119.1	-36.6	-7.39892	47.6869	9.64021	8.7064	1.76005	-244	10	-49.3261	2.02156	-21.5	37.7333	7.62803	46.7642	9.45368	8.53794	1.726	1	244	0.20216	49.3261	0.89025	0.88275	0.06724	0.01228	0.79011	0.10536	0.01924	0.00023	3.63937
CC_Mid_Posterior	470.967	103.335	437.633	98.8163	-33.3333	-7.3373	31.2767	6.88458	5.71031	1.25695	-114	18	-25.0936	3.96214	-28.5	35.1333	7.73351	29.1674	6.42031	5.32522	1.17218	1	114	0.22012	25.0936	0.90198	0.88524	0.06288	0.01148	0.79412	0.09958	0.01818	0	5.60147
CC_Posterior	916.7	163.07	891	170.391	-25.7	-2.84339	31.0519	3.43551	5.66927	0.62724	-144	16	-15.9319	1.77021	-17.5	27.6333	3.05729	29.284	3.23991	5.3465	0.59152	0	144	0	15.9319	0.97153	0.90789	0.06814	0.01244	0.83132	0.10804	0.01973	9e-05	4.03327
CSF	1203.7	287.514	1162.77	266.206	-40.9333	-3.45945	83.0201	7.01638	15.1573	1.28101	-171	292	-14.4519	24.6781	-40.5	67.6667	5.71879	62.3618	5.27045	11.3857	0.96225	6	292	0.50709	24.6781	0.94595	0.90785	0.05525	0.01009	0.83125	0.08187	0.01495	0.01143	1.94178
Left-Accumbens-area	584.6	124.642	535.5	120.199	-49.1	-8.76707	99.7557	17.8119	18.2128	3.252	-242	173	-43.2104	30.8901	-57	86.9667	15.5284	67.9789	12.138	12.4112	2.21609	3	242	0.53567	43.2104	0.61221	0.79469	0.08665	0.01582	0.65933	0.1158	0.02114	0.01156	1.93694
Left-Amygdala	1747.6	350.809	1679.4	295.946	-68.2	-3.98016	143.093	8.35089	26.125	1.52466	-475	243	-27.721	14.1815	-72	125.133	7.30279	95.3353	5.56377	17.4058	1.0158	13	475	0.75868	27.721	0.88504	0.87433	0.04183	0.00764	0.77672	0.06059	0.01106	0.01416	1.84896
Left-Caudate	4001.9	589.949	4074.03	606.87	72.1333	1.78638	141.042	3.49289	25.7506	0.63771	-177	589	-4.38339	14.5866	53	100.133	2.4798	122.078	3.02325	22.2883	0.55197	6	589	0.14859	14.5866	0.966	0.93878	0.02211	0.00404	0.88463	0.03868	0.00706	0.00897	2.04713
Left-Cerebellum-Cortex	47432.4	6455.42	46849	8888.43	-583.333	-1.23743	4481.47	9.50658	818.201	1.73566	-17349	3746	-36.8026	7.94642	1174.5	2949.53	6.25687	3381.69	7.17362	617.41	1.30972	250	17349	0.53033	36.8026	0.83608	0.88246	0.06407	0.0117	0.78964	0.08683	0.01585	0.48158	0.317335
Left-Cerebellum-White-Matter	16168.6	2525.75	14738.3	2825.87	-1430.33	-9.25576	1666.03	10.781	304.174	1.96832	-3634	2571	-23.5158	16.6371	-1677	1933.73	12.5133	1011.82	6.54756	184.733	1.19541	18	3634	0.11648	23.5158	0.69175	0.86787	0.04548	0.0083	0.76659	0.06481	0.01183	6e-05	4.23661
Left-Hippocampus	4083.83	504.176	4041	513.414	-42.8333	-1.05438	158.008	3.88952	28.8482	0.71013	-287	330	-7.06476	8.12324	-36.5	133.167	3.27802	92.3024	2.27211	16.852	0.41483	4	330	0.09846	8.12324	0.94989	0.91537	0.02403	0.00439	0.84395	0.03979	0.00726	0.14839	0.82859
Left-Inf-Lat-Vent	388	308.573	361.167	313.012	-26.8333	-7.16352	58.9319	15.7327	10.7594	2.87238	-170	96	-45.3838	25.6285	-28.5	49.8333	13.3037	40.6058	10.8403	7.41358	1.97915	1	170	0.26696	45.3838	0.97893	0.83737	0.07134	0.01303	0.72024	0.09588	0.01751	0.01858	1.73086
Left-Lateral-Ventricle	8775.97	6487.05	8961.17	6541.15	185.2	2.08827	196.86	2.21975	35.9416	0.40527	-141	940	-1.58988	10.5992	187	203.267	2.29199	177.465	2.00105	32.4005	0.36534	10	940	0.11276	10.5992	0.99915	0.96396	0.02063	0.00377	0.93043	0.03735	0.00682	2e-05	4.78067
Left-Pallidum	1627.9	368.569	1819	232.187	191.1	11.0882	229.311	13.3054	41.8663	2.42922	-117	811	-6.78871	47.0568	130.5	212.767	12.3454	208.642	12.1061	38.0927	2.21026	3	811	0.17407	47.0568	0.5783	0.80608	0.15998	0.02921	0.67515	0.18838	0.03439	8e-05	4.07091
Left-Putamen	6139.03	797.121	6090.2	795.493	-48.8333	-0.79863	262.386	4.29113	47.9049	0.78345	-555	370	-9.07661	6.05107	-35.5	213.9	3.49818	154.862	2.53266	28.2739	0.4624	4	555	0.06542	9.07661	0.94564	0.91861	0.02471	0.00451	0.84948	0.0419	0.00765	0.31645	0.499695
Left-Thalamus-Proper	7270.03	876.051	7396.9	928.604	126.867	1.72997	328.611	4.48098	59.9959	0.81811	-477	868	-6.50443	11.8361	74	261	3.55903	232.734	3.17359	42.4913	0.57942	4	868	0.05454	11.8361	0.92636	0.9388	0.01887	0.00345	0.88465	0.03313	0.00605	0.04318	1.36471
Left-VentralDC	3866.8	416.272	4019.27	434.883	152.467	3.86674	222.169	5.63447	40.5623	1.02871	-299	722	-7.58299	18.3108	129	196.8	4.99108	182.595	4.63083	33.3372	0.84547	2	722	0.05072	18.3108	0.80986	0.88037	0.04937	0.00901	0.78631	0.07525	0.01374	0.00077	3.11528
Left-choroid-plexus	1637.67	334.538	1615.5	328.758	-22.1667	-1.36277	126.539	7.77942	23.1027	1.42032	-306	334	-18.8124	20.5338	-5.5	92.7	5.69906	87.3543	5.37041	15.9486	0.9805	4	334	0.24591	20.5338	0.9274	0.80742	0.04956	0.00905	0.67703	0.0687	0.01254	0.34525	0.461868
Left-vessel	84.3667	48.1259	92.6333	55.2209	8.26667	9.34087	15.407	17.409	2.81291	3.17843	-33	35	-37.2881	39.548	7.5	13.9333	15.7439	10.3555	11.7012	1.89065	2.13633	0	35	0	39.548	0.94481	0.80339	0.09831	0.01795	0.67139	0.1284	0.02344	0.0064	2.19367
Optic-Chiasm	198.867	96.5579	187.7	101.122	-11.1667	-5.77736	62.4069	32.2878	11.3939	5.89492	-167	132	-86.4017	68.2935	-9	46.9667	24.2994	41.7335	21.5919	7.61947	3.94212	6	167	3.10425	86.4017	0.80101	0.74123	0.22811	0.04165	0.58885	0.23129	0.04223	0.33516	0.474745
Right-Accumbens-area	697.433	102.706	636.467	104.594	-60.9667	-9.14112	51.3893	7.70512	9.38236	1.40676	-167	41	-25.0394	6.14739	-59	66.1667	9.92078	44.2377	6.63283	8.07666	1.21098	2	167	0.29987	25.0394	0.73094	0.8153	0.06488	0.01184	0.6882	0.09103	0.01662	0	6.37962
Right-Amygdala	1803.73	331.037	1676.13	303.709	-127.6	-7.33361	105.475	6.06202	19.257	1.10677	-380	115	-21.8399	6.60945	-124.5	141.8	8.14974	84.6618	4.8658	15.4571	0.88837	29	380	1.66673	21.8399	0.87112	0.87915	0.03318	0.00606	0.78436	0.05037	0.0092	0	6.52575
Right-Caudate	4067.87	589.165	4173.8	599.928	105.933	2.57068	174.491	4.23437	31.8576	0.77309	-84	737	-2.03842	17.8847	45.5	128.933	3.12882	157.667	3.82611	28.786	0.69855	0	737	0	17.8847	0.94291	0.93842	0.02179	0.00398	0.88398	0.03797	0.00693	0.0024	2.61889
Right-Cerebellum-Cortex	47507.6	7053.15	48508.3	8814.84	1000.73	2.08452	2959.28	6.16414	540.287	1.12541	-7137	6134	-14.8663	12.777	1227.5	2453.6	5.11082	1888.27	3.93325	344.749	0.71811	188	7137	0.3916	14.8663	0.92593	0.89914	0.02802	0.00512	0.81675	0.04551	0.00831	0.0742	1.12961
Right-Cerebellum-White-Matter	15802.9	2573.71	14949.2	2594.6	-853.667	-5.55193	1572.59	10.2276	287.115	1.86729	-4528	1424	-29.4484	9.26117	-641.5	1402.67	9.12242	1091.61	7.0994	199.299	1.29617	169	4528	1.09911	29.4484	0.77196	0.88052	0.03197	0.00584	0.78654	0.05034	0.00919	0.00588	2.23077
Right-Hippocampus	4191.27	491.988	4138.7	498.85	-52.5667	-1.26211	132.498	3.18123	24.1907	0.58081	-351	292	-8.4274	7.01083	-68.5	112.1	2.69149	86.1071	2.06741	15.7209	0.37746	15	351	0.36015	8.4274	0.95989	0.92357	0.02037	0.00372	0.85799	0.03458	0.00631	0.03809	1.41918
Right-Inf-Lat-Vent	335.6	283.38	328.233	282.407	-7.36667	-2.21943	41.2214	12.4192	7.52597	2.26743	-109	81	-32.8396	24.4037	-7	32.3667	9.75144	25.9156	7.80787	4.73152	1.42552	1	109	0.30128	32.8396	0.9894	0.87381	0.08223	0.01501	0.77591	0.11669	0.0213	0.33576	0.473972
Right-Lateral-Ventricle	7753.4	4230.54	7883.3	4255.58	129.9	1.66148	185.274	2.36973	33.8262	0.43265	-287	478	-3.67085	6.11382	90.5	176.633	2.25921	139.668	1.78641	25.4997	0.32615	10	478	0.1279	6.11382	0.99861	0.9611	0.02166	0.00395	0.92511	0.03855	0.00704	0.00062	3.2102
Right-Pallidum	1450.4	270.97	1567.5	177.899	117.1	7.76036	215.774	14.2996	39.3948	2.61074	-165	861	-10.9348	57.0595	62	146.3	9.69548	196.474	13.0206	35.8711	2.37722	1	861	0.06627	57.0595	0.47173	0.80544	0.17607	0.03215	0.67425	0.20111	0.03672	0.00589	2.22992
Right-Putamen	5816.13	741.211	5750.33	740.393	-65.8	-1.13777	238.442	4.12299	43.5334	0.75275	-404	584	-6.98571	10.0982	-158	207.867	3.5943	128.978	2.2302	23.548	0.40718	5	584	0.08646	10.0982	0.94604	0.91844	0.02636	0.00481	0.84918	0.04431	0.00809	0.14149	0.849285
Right-Thalamus-Proper	7426.07	939.699	7543.8	880.481	117.733	1.57294	308.977	4.12798	56.4112	0.75366	-606	1008	-8.09626	13.4671	48.5	235.267	3.1432	229.231	3.06256	41.8516	0.55914	6	1008	0.08016	13.4671	0.9362	0.94277	0.01661	0.00303	0.89174	0.02953	0.00539	0.04578	1.33931
Right-VentralDC	3869.5	398.532	3934.03	412.153	64.5333	1.65395	206.851	5.30148	37.7657	0.96791	-233	583	-5.97165	14.942	17.5	162.867	4.17418	140.198	3.59319	25.5965	0.65602	9	583	0.23066	14.942	0.86207	0.88251	0.04838	0.00883	0.78973	0.07455	0.01361	0.09817	1.008
Right-choroid-plexus	1763.5	407.956	1734.07	371.785	-29.4333	-1.68307	181.821	10.397	33.1957	1.89822	-326	560	-18.6415	32.0223	-45	140.433	8.03034	116.419	6.65714	21.2551	1.21542	2	560	0.11437	32.0223	0.89222	0.8102	0.05201	0.0095	0.68096	0.07253	0.01324	0.38256	0.417305
Right-vessel	62.0667	45.7218	70.9333	47.6799	8.86667	13.3333	13.9772	21.0183	2.55187	3.8374	-15	40	-22.5564	60.1504	7.5	12.1333	18.2456	11.1533	16.7718	2.0363	3.0621	0	40	0	60.1504	0.93921	0.78997	0.1263	0.02306	0.65286	0.15667	0.0286	0.00163	2.78791
ctx-lh-bankssts	2481.43	484.136	2336.77	429.111	-144.667	-6.00501	325.625	13.5165	59.4508	2.46776	-1024	408	-42.5055	16.9358	-139	273	11.332	224.907	9.33572	41.0622	1.70446	32	1024	1.3283	42.5055	0.7111	0.78616	0.07868	0.01436	0.64766	0.09937	0.01814	0.02135	1.67051
ctx-lh-caudalanteriorcingulate	1960.73	623.027	2011.6	720.603	50.8667	2.56105	205.612	10.3522	37.5395	1.89005	-424	509	-21.3477	25.6273	37.5	148.333	7.46832	148.968	7.50029	27.1978	1.36936	6	509	0.30209	25.6273	0.95214	0.79663	0.07427	0.01356	0.66199	0.09391	0.01715	0.18587	0.730783
ctx-lh-caudalmiddlefrontal	7192.63	1040.67	6945.93	951.958	-246.7	-3.48975	750.984	10.6232	137.11	1.93952	-1349	1561	-19.0826	22.0815	-324.5	632.567	8.9481	461.518	6.52849	84.2612	1.19193	6	1561	0.08487	22.0815	0.69853	0.88458	0.03135	0.00572	0.79305	0.05011	0.00915	0.08239	1.08413
ctx-lh-cuneus	2926.87	399.864	2971.07	452.392	44.2	1.49883	228.298	7.74164	41.6814	1.41342	-362	823	-12.2755	27.9081	52.5	167.933	5.69465	158.01	5.35813	28.8485	0.97826	1	823	0.03391	27.9081	0.85648	0.80692	0.05507	0.01005	0.67633	0.07285	0.0133	0.2977	0.526217
ctx-lh-entorhinal	1688.57	381.591	1776.7	440.333	88.1333	5.08667	309.996	17.8916	56.5973	3.26655	-882	895	-50.9052	51.6555	89	219.733	12.682	232.778	13.4349	42.4992	2.45287	2	895	0.11543	51.6555	0.70548	0.71079	0.07872	0.01437	0.55133	0.09001	0.01643	0.13027	0.885153
ctx-lh-frontalpole	665.133	178.532	775.133	194.179	110	15.275	103.649	14.393	18.9236	2.62779	-88	340	-12.22	47.2135	111	122.2	16.9691	88.3884	12.2739	16.1374	2.2409	9	340	1.24977	47.2135	0.70199	0.76713	0.12285	0.02243	0.62223	0.14181	0.02589	0	5.57151
ctx-lh-fusiform	8931.93	1817.84	9349.93	1654.84	418	4.57284	741.779	8.11492	135.43	1.48157	-832	2340	-9.10192	25.5991	433	661.533	7.23704	527.512	5.77087	96.31	1.05361	78	2340	0.8533	25.5991	0.88456	0.83756	0.04235	0.00773	0.72052	0.06075	0.01109	0.00443	2.35391
ctx-lh-inferiorparietal	12100.2	2234.57	12237.3	2051.77	137.1	1.12666	918.073	7.54451	167.616	1.37743	-2115	1679	-17.3806	13.7976	213	697.433	5.73135	599.264	4.92461	109.41	0.89911	13	2115	0.10683	17.3806	0.90938	0.89131	0.02832	0.00517	0.80393	0.0448	0.00818	0.42006	0.376685
ctx-lh-inferiortemporal	9126.03	2075.51	10064.8	2187.55	938.8	9.78382	1054.43	10.9889	192.512	2.00629	-1357	3958	-14.1421	41.2488	766	1071.2	11.1636	914.617	9.5318	166.985	1.74026	28	3958	0.29181	41.2488	0.79442	0.81074	0.06561	0.01198	0.68171	0.08699	0.01588	4e-05	4.44657
ctx-lh-insula	6351.97	797.986	7073.17	927.539	721.2	10.744	355.774	5.30012	64.9552	0.96767	320	1836	4.76718	27.3517	604	721.2	10.744	355.774	5.30012	64.9552	0.96767	320	1836	4.76718	27.3517	0.63392	0.86543	0.02519	0.0046	0.76278	0.03833	0.007	0	30
ctx-lh-isthmuscingulate	2374.67	405.944	2593.43	448.43	218.767	8.80685	221.174	8.90376	40.3806	1.6256	-249	621	-10.0239	24.9995	223	253.767	10.2158	178.35	7.17982	32.5622	1.31085	5	621	0.20128	24.9995	0.7554	0.80134	0.02954	0.00539	0.66853	0.04044	0.00738	1e-05	5.10087
ctx-lh-lateraloccipital	11708.3	1824.66	11714.7	1628.81	6.4	0.05465	831.657	7.10118	151.839	1.29649	-2144	1995	-18.3067	17.0345	64	590.133	5.03891	575.699	4.91566	105.108	0.89747	35	2144	0.29885	18.3067	0.88802	0.86128	0.04216	0.0077	0.75636	0.06199	0.01132	0.96667	0.0147226
ctx-lh-lateralorbitofrontal	7968.3	1118.88	8229.67	1337.71	261.367	3.22715	381.635	4.71213	69.6767	0.86031	-537	1093	-6.63046	13.4955	250.5	369.967	4.56806	273.346	3.37507	49.906	0.6162	18	1093	0.22225	13.4955	0.93196	0.88807	0.02289	0.00418	0.79868	0.03573	0.00652	0.00078	3.10632
ctx-lh-lingual	6451.77	1065.48	6301.13	1034.42	-150.633	-2.36234	639.261	10.0253	116.713	1.83037	-1572	1817	-24.6532	28.4955	-98.5	444.633	6.97305	477.087	7.48201	87.1038	1.36602	34	1817	0.53321	28.4955	0.81097	0.84261	0.03468	0.00633	0.72803	0.05014	0.00915	0.20703	0.683975
ctx-lh-medialorbitofrontal	4368.63	803.381	5090.83	724.242	722.2	15.2694	596.076	12.6027	108.828	2.30093	-633	1869	-13.3834	39.516	731	793.067	16.7677	494.188	10.4485	90.2259	1.90763	14	1869	0.296	39.516	0.39288	0.7906	0.04395	0.00802	0.65371	0.06029	0.01101	0	6.52575
ctx-lh-middletemporal	9956.07	1694.38	10228	1432.41	271.967	2.69486	714.301	7.07786	130.413	1.29223	-1797	1894	-17.8061	18.7673	316.5	579.367	5.74082	489.389	4.84925	89.3498	0.88535	16	1894	0.15854	18.7673	0.88544	0.82734	0.07024	0.01282	0.70553	0.0918	0.01676	0.04594	1.33781
ctx-lh-paracentral	4048.53	709.831	4023.07	736.478	-25.4667	-0.63102	409.99	10.1588	74.8536	1.85474	-801	635	-19.8474	15.7342	17.5	346.867	8.59474	210.47	5.21507	38.4263	0.95214	12	801	0.29734	19.8474	0.84371	0.86732	0.03009	0.00549	0.76573	0.04591	0.00838	0.73614	0.133037
ctx-lh-parahippocampal	2215.5	365.19	2112.03	333.456	-103.467	-4.78178	296.208	13.6895	54.0799	2.49934	-633	649	-29.2545	29.994	-100	254	11.7388	179.089	8.27674	32.6971	1.51112	12	649	0.55459	29.994	0.61553	0.80854	0.07058	0.01289	0.67862	0.09082	0.01658	0.06564	1.18284
ctx-lh-parsopercularis	5107.7	676.914	5052.73	602.234	-54.9667	-1.08197	327.301	6.44266	59.7567	1.17626	-833	582	-16.3969	11.4562	-25	253.033	4.98076	209.804	4.12983	38.3048	0.754	23	833	0.45274	16.3969	0.87013	0.88354	0.02641	0.00482	0.79137	0.04197	0.00766	0.36524	0.437417
ctx-lh-parsorbitalis	2435.13	614.609	2318.77	403.24	-116.367	-4.89563	342.048	14.3902	62.4491	2.62728	-1145	329	-48.171	13.8413	-36.5	261.7	11.0099	245.268	10.3186	44.7796	1.88391	11	1145	0.46278	48.171	0.76771	0.84519	0.04601	0.0084	0.73188	0.06761	0.01234	0.07256	1.13928
ctx-lh-parstriangularis	3739.3	756.8	3639	619.531	-100.3	-2.71878	411.737	11.1608	75.1725	2.03767	-1427	857	-38.681	23.2303	-53	286.967	7.77867	307.806	8.34356	56.1975	1.52332	0	1427	0	38.681	0.81858	0.85633	0.04629	0.00845	0.74876	0.06727	0.01228	0.1925	0.71557
ctx-lh-pericalcarine	2083.27	409.205	2134.2	386.156	50.9333	2.41535	276.299	13.1026	50.445	2.3922	-986	649	-46.7579	30.7768	107	198.667	9.42114	195.436	9.26794	35.6816	1.69209	4	986	0.18969	46.7579	0.75871	0.80317	0.06324	0.01155	0.67108	0.08424	0.01538	0.321	0.493498
ctx-lh-postcentral	10533.8	1677.92	10478	1652.65	-55.7667	-0.53081	528.926	5.03457	96.5682	0.91918	-1457	1587	-13.8684	15.1058	-86	365.767	3.48154	380.238	3.61929	69.4217	0.66079	13	1587	0.12374	15.1058	0.95066	0.89793	0.02495	0.00455	0.81476	0.04029	0.00736	0.56807	0.245598
ctx-lh-posteriorcingulate	3695.43	680.805	3527	629.165	-168.433	-4.66417	322.487	8.93014	58.8778	1.63041	-1494	188	-41.3711	5.206	-114.5	230.5	6.38289	279.97	7.7528	51.1154	1.41546	13	1494	0.35999	41.3711	0.85214	0.84107	0.03297	0.00602	0.72574	0.04641	0.00847	0.00776	2.11015
ctx-lh-precentral	14402.6	1994.99	14426.1	2094.81	23.4333	0.16257	417.215	2.89444	76.1727	0.52845	-833	934	-5.77896	6.47965	-19.5	309.967	2.1504	274.306	1.90301	50.0812	0.34744	19	934	0.13181	6.47965	0.97982	0.91693	0.02081	0.0038	0.8466	0.0349	0.00637	0.76056	0.118866
ctx-lh-precuneus	10105.2	1513.71	10351.2	1528.77	246.033	2.40544	465.55	4.55163	84.9975	0.83101	-787	1186	-7.6944	11.5954	295	417.833	4.0851	314.248	3.07236	57.3736	0.56093	9	1186	0.08799	11.5954	0.94199	0.8927	0.01899	0.00347	0.8062	0.03045	0.00556	0.00714	2.14626
ctx-lh-rostralanteriorcingulate	2260.87	581.613	2813.2	731.922	552.333	21.7708	342.833	13.5132	62.5925	2.46715	-154	1216	-6.07008	47.93	516.5	562.6	22.1755	325.105	12.8144	59.3558	2.33958	9	1216	0.35475	47.93	0.59135	0.78521	0.05355	0.00978	0.64637	0.07061	0.01289	0	30
ctx-lh-rostralmiddlefrontal	16154.7	3723.09	17001.3	3644.76	846.667	5.10717	803.349	4.84587	146.671	0.88473	-721	2268	-4.34914	13.6808	823	991.667	5.98182	607.963	3.66729	110.998	0.66955	98	2268	0.59114	13.6808	0.95124	0.89517	0.02084	0.0038	0.81023	0.03383	0.00618	0	5.52575
ctx-lh-superiorfrontal	23752.1	2856.17	23690.5	2758.31	-61.6	-0.25968	683.078	2.8796	124.712	0.52574	-1793	808	-7.55862	3.40623	109	547.067	2.30623	401.147	1.69108	73.239	0.30875	13	1793	0.0548	7.55862	0.97114	0.92115	0.01449	0.00265	0.85383	0.02458	0.00449	0.62507	0.204071
ctx-lh-superiorparietal	13995.7	2107.65	14028.7	2006.8	32.9333	0.23503	639.859	4.56644	116.822	0.83371	-1414	1281	-10.0912	9.14203	98.5	515.4	3.67822	368.436	2.62939	67.2669	0.48006	54	1414	0.38538	10.0912	0.95311	0.89663	0.01611	0.00294	0.81263	0.02639	0.00482	0.78001	0.107896
ctx-lh-superiortemporal	12186.7	2002.77	12149.5	1559.42	-37.1333	-0.30517	993.564	8.16531	181.399	1.49078	-4183	1664	-34.3768	13.6751	25.5	637.533	5.23938	753.745	6.19443	137.614	1.13094	10	4183	0.08218	34.3768	0.85131	0.88738	0.02975	0.00543	0.79756	0.04614	0.00842	0.83923	0.0761188
ctx-lh-supramarginal	11146.4	1788.3	11116.9	1691.24	-29.5333	-0.26531	717.515	6.44571	131	1.17682	-1913	1709	-17.1852	15.3526	-103	522	4.68932	483.581	4.34419	88.2894	0.79314	0	1913	0	17.1852	0.9176	0.89108	0.03581	0.00654	0.80356	0.05705	0.01042	0.82321	0.0844876
ctx-lh-temporalpole	2014.1	356.567	2455.67	328.584	441.567	19.7579	334.652	14.974	61.0988	2.73387	-239	1107	-10.6941	49.5328	428.5	463.233	20.7274	302.839	13.5506	55.2907	2.47398	28	1107	1.25286	49.5328	0.08313	0.75589	0.13118	0.02395	0.60758	0.14183	0.0259	0	7.22472
ctx-lh-transversetemporal	1243.4	287.07	1197.4	250.547	-46	-3.76926	132.309	10.8415	24.1563	1.97937	-490	245	-40.1508	20.0754	-23.5	92.3333	7.56583	104.285	8.54514	19.0397	1.56012	0	490	0	40.1508	0.86956	0.84065	0.04421	0.00807	0.72511	0.06218	0.01135	0.06684	1.17497
ctx-rh-bankssts	2342.3	440.763	2302.87	365.455	-39.4333	-1.69782	305.015	13.1326	55.6879	2.39767	-519	479	-22.3458	20.6236	-35.5	258.233	11.1184	160.185	6.89683	29.2456	1.25918	28	519	1.20555	22.3458	0.72027	0.77164	0.08414	0.01536	0.62819	0.10202	0.01863	0.48453	0.314681
ctx-rh-caudalanteriorcingulate	2184.53	620.54	2149.3	534.174	-35.2333	-1.62597	250.559	11.5629	45.7456	2.11109	-964	434	-44.4872	20.0285	-6	168.233	7.76372	186.509	8.60713	34.0518	1.57144	4	964	0.18459	44.4872	0.90757	0.81098	0.06245	0.0114	0.68206	0.08496	0.01551	0.44741	0.349294
ctx-rh-caudalmiddlefrontal	6881.47	1460.27	6675.9	1261.76	-205.567	-3.03255	649.614	9.58318	118.603	1.74964	-1484	1357	-21.8922	20.0186	-232.5	530.167	7.82109	418.262	6.17026	76.3639	1.12653	37	1484	0.54583	21.8922	0.87958	0.88652	0.02836	0.00518	0.79617	0.04558	0.00832	0.09368	1.02837
ctx-rh-cuneus	3168.7	511.249	3280.67	475.224	111.967	3.47218	348.704	10.8136	63.6643	1.97428	-540	777	-16.7458	24.0954	67.5	278.167	8.62617	233.492	7.24077	42.6296	1.32198	14	777	0.43415	24.0954	0.73532	0.80686	0.04355	0.00795	0.67625	0.0612	0.01117	0.08918	1.04974
ctx-rh-entorhinal	1556.23	356.15	1692.2	378.579	135.967	8.37121	278.69	17.1584	50.8815	3.13268	-773	553	-47.5922	34.0472	183	247.433	15.234	182.915	11.2617	33.3956	2.0561	16	773	0.98509	47.5922	0.66357	0.72548	0.11889	0.02171	0.56922	0.12905	0.02356	0.01223	1.91241
ctx-rh-frontalpole	867.367	152.809	1027.83	212.92	160.467	16.934	193.053	20.3728	35.2465	3.71955	-211	733	-22.2668	77.3533	136.5	187.667	19.8044	165.752	17.4917	30.262	3.19354	8	733	0.84424	77.3533	0.23675	0.76418	0.09414	0.01719	0.61835	0.11559	0.0211	9e-05	4.05681
ctx-rh-fusiform	8648.9	1452.95	9161.03	1570.04	512.133	5.7511	578.098	6.49186	105.546	1.18525	-259	2763	-2.90849	31.0276	400.5	534.133	5.99815	557.122	6.25631	101.716	1.14224	18	2763	0.20213	31.0276	0.8755	0.84928	0.03287	0.006	0.73804	0.04903	0.00895	4e-05	4.41718
ctx-rh-inferiorparietal	14636.7	2455.88	14822.5	2419.55	185.767	1.26118	679.938	4.61613	124.139	0.84279	-1141	1817	-7.7463	12.3357	237	562.9	3.82155	412.593	2.80111	75.3287	0.51141	5	1817	0.03395	12.3357	0.95953	0.90353	0.01963	0.00358	0.82404	0.03232	0.0059	0.14534	0.837602
ctx-rh-inferiortemporal	9278.17	2731.73	9779.47	2207.98	501.3	5.26088	832.824	8.74006	152.052	1.59571	-1695	1955	-17.7882	20.5167	624.5	826.833	8.67719	496.323	5.20865	90.6157	0.95096	196	1955	2.05692	20.5167	0.92597	0.83288	0.05857	0.01069	0.71362	0.08289	0.01513	0.00259	2.58711
ctx-rh-insula	6087.13	802.214	6764.4	1088.89	677.267	10.5399	412.933	6.4262	75.3908	1.17326	-89	1792	-1.38505	27.8877	582	683.2	10.6322	402.695	6.26687	73.5216	1.14417	89	1792	1.38505	27.8877	0.69669	0.86259	0.02086	0.00381	0.75839	0.03254	0.00594	0	30
ctx-rh-isthmuscingulate	2315.4	452.965	2502.93	450.258	187.533	7.78416	225.103	9.34362	41.0981	1.7059	-336	824	-13.9467	34.2027	164	235	9.75441	172.985	7.18027	31.5825	1.31093	33	824	1.36977	34.2027	0.80183	0.78417	0.04836	0.00883	0.64497	0.0629	0.01148	9e-05	4.06908
ctx-rh-lateraloccipital	11432.6	1790.27	11421.8	1676.06	-10.7333	-0.09393	522.366	4.57125	95.3705	0.83459	-970	1332	-8.48852	11.6564	14.5	410.733	3.59435	313.793	2.74601	57.2904	0.50135	20	1332	0.17502	11.6564	0.95609	0.86639	0.04039	0.00737	0.76428	0.06051	0.01105	0.91117	0.0404024
ctx-rh-lateralorbitofrontal	7471.67	1093.94	7884.33	1265.84	412.667	5.37466	480.75	6.2614	87.7726	1.14317	-738	1460	-9.61188	19.0154	405	509.933	6.64149	371.871	4.84333	67.8941	0.88427	8	1460	0.10419	19.0154	0.86331	0.87553	0.0267	0.00488	0.77862	0.04096	0.00748	6e-05	4.23571
ctx-rh-lingual	6366.43	909.72	6492.37	740.437	125.933	1.95871	431.273	6.70783	78.7394	1.22468	-689	1115	-10.7164	17.3422	134.5	349.933	5.44271	275.185	4.28011	50.2417	0.78144	8	1115	0.12443	17.3422	0.85829	0.84145	0.02688	0.00491	0.72629	0.03959	0.00723	0.12058	0.918733
ctx-rh-medialorbitofrontal	4766.77	787.587	5189.87	866.904	423.1	8.49886	366.84	7.36875	66.9754	1.34534	-285	1576	-5.72483	31.6573	450.5	472.033	9.48179	298.762	6.00127	54.5463	1.09568	68	1576	1.36592	31.6573	0.78815	0.84865	0.02605	0.00476	0.73709	0.03843	0.00702	0	6.18333
ctx-rh-middletemporal	10928	1630.78	11087.7	1428.7	159.733	1.45108	612.409	5.56338	111.81	1.01573	-705	1794	-6.40451	16.2974	194	486.6	4.42048	395.595	3.59375	72.2254	0.65613	1	1794	0.00908	16.2974	0.91756	0.85763	0.04547	0.0083	0.75075	0.06651	0.01214	0.1638	0.785691
ctx-rh-paracentral	4616.73	789.904	4545.2	799.484	-71.5333	-1.56153	464.755	10.1454	84.8523	1.85228	-858	979	-18.7297	21.371	-124	386.267	8.43199	258.735	5.64805	47.2384	1.03119	1	979	0.02183	21.371	0.83051	0.87078	0.03233	0.0059	0.77114	0.04943	0.00903	0.40611	0.391356
ctx-rh-parahippocampal	2143	333.188	1964.9	312.935	-178.1	-8.6711	206.526	10.0551	37.7063	1.83579	-643	143	-31.3055	6.96219	-121	204.033	9.9337	180.003	8.76376	32.864	1.60004	3	643	0.14606	31.3055	0.67446	0.80617	0.0544	0.00993	0.67528	0.07371	0.01346	5e-05	4.26188
ctx-rh-parsopercularis	4246.2	888.446	4112.83	741.489	-133.367	-3.19096	390.669	9.34722	71.326	1.70656	-1608	433	-38.4734	10.36	-26.5	269.7	6.4529	309.476	7.4046	56.5024	1.35189	8	1608	0.19141	38.4734	0.87713	0.86782	0.03985	0.00728	0.7665	0.05942	0.01085	0.07164	1.14487
ctx-rh-parsorbitalis	2735.83	427.832	2804.33	416.71	68.5	2.47285	241.755	8.72735	44.1382	1.59339	-594	590	-21.4434	21.299	121.5	192.9	6.96369	157.499	5.68572	28.7553	1.03806	17	594	0.6137	21.4434	0.82911	0.85219	0.05038	0.0092	0.74245	0.07387	0.01349	0.13152	0.881001
ctx-rh-parstriangularis	4257.5	933.62	4434.33	811.208	176.833	4.06895	355.164	8.17235	64.8437	1.49206	-477	1001	-10.9758	23.0331	204.5	328.1	7.54962	217.09	4.99525	39.635	0.912	11	1001	0.25311	23.0331	0.90072	0.87144	0.03702	0.00676	0.77217	0.05587	0.0102	0.01073	1.96936
ctx-rh-pericalcarine	2467.03	506.317	2410.9	401.837	-56.1333	-2.30152	263.972	10.8231	48.1945	1.97602	-678	409	-27.7987	16.7694	-48.5	214.2	8.78241	159.616	6.54439	29.1417	1.19484	4	678	0.164	27.7987	0.83142	0.81875	0.04314	0.00788	0.69312	0.0607	0.01108	0.25362	0.595813
ctx-rh-postcentral	9779.1	1496.78	9662.4	1386.21	-116.7	-1.20052	373.439	3.84167	68.1803	0.70139	-916	934	-9.42314	9.60831	-77	277.833	2.85815	271.462	2.79261	49.562	0.50986	24	934	0.24689	9.60831	0.96438	0.89906	0.02199	0.00401	0.81663	0.03564	0.00651	0.09764	1.01037
ctx-rh-posteriorcingulate	3519.13	609.348	3351.47	580.458	-167.667	-4.8807	217.572	6.33341	39.723	1.15632	-745	162	-21.6866	4.71575	-85.5	195.733	5.69771	191.797	5.58314	35.0173	1.01934	2	745	0.05822	21.6866	0.89761	0.83769	0.0321	0.00586	0.72072	0.04703	0.00859	0.00022	3.6597
ctx-rh-precentral	14003.2	1838.86	13883.1	1781.08	-120.133	-0.86159	390.555	2.80105	71.3053	0.5114	-1177	545	-8.44141	3.90872	-85	296.933	2.1296	276.14	1.98047	50.4161	0.36158	10	1177	0.07172	8.44141	0.97532	0.91867	0.017	0.0031	0.84958	0.02849	0.0052	0.10277	0.98815
ctx-rh-precuneus	10717.5	1713.58	11073.1	1775.87	355.6	3.2638	473.938	4.34994	86.5288	0.79419	-1122	1331	-10.298	12.2163	410.5	478.8	4.39457	343.91	3.15651	62.7891	0.5763	3	1331	0.02753	12.2163	0.94413	0.88873	0.02343	0.00428	0.79975	0.03746	0.00684	0.0003	3.52749
ctx-rh-rostralanteriorcingulate	1796.93	399.433	2307.43	563.182	510.5	24.8759	262.012	12.7675	47.8367	2.33102	148	1293	7.21183	63.0061	472	510.5	24.8759	262.012	12.7675	47.8367	2.33102	148	1293	7.21183	63.0061	0.46034	0.74951	0.05	0.00913	0.59937	0.06133	0.0112	0	30
ctx-rh-rostralmiddlefrontal	16500.5	3240.43	17041.9	3111.13	541.4	3.22815	916.186	5.46285	167.272	0.99738	-1219	2120	-7.26841	12.6407	620	863.533	5.14891	609.275	3.63286	111.238	0.66327	14	2120	0.08348	12.6407	0.94562	0.89587	0.0225	0.00411	0.81138	0.03691	0.00674	0.00302	2.5198
ctx-rh-superiorfrontal	23658.4	3772.13	23457.8	3482.67	-200.567	-0.85137	707.107	3.00154	129.1	0.548	-1324	1642	-5.62014	6.97	-264.5	593.567	2.51958	420.885	1.78658	76.8427	0.32618	117	1642	0.49664	6.97	0.98015	0.92341	0.01187	0.00217	0.85771	0.02041	0.00373	0.13113	0.882295
ctx-rh-superiorparietal	14105.1	2188.34	14089.6	2329.88	-15.5	-0.10995	767.844	5.44672	140.188	0.99443	-1619	2020	-11.4844	14.3289	-23	572.7	4.06247	500.537	3.55058	91.3851	0.64824	15	2020	0.1064	14.3289	0.94414	0.89616	0.02942	0.00537	0.81186	0.04576	0.00835	0.91272	0.0396598
ctx-rh-superiortemporal	11390.9	1680.49	11854.4	1586.53	463.467	3.98761	575.366	4.95038	105.047	0.90381	-785	1738	-6.75404	14.9535	448	601.067	5.1715	423.693	3.6454	77.3553	0.66556	36	1738	0.30974	14.9535	0.90174	0.9067	0.02193	0.004	0.82933	0.03618	0.00661	0.00013	3.88786
ctx-rh-supramarginal	10483	1625.84	10380.1	1699.51	-102.967	-0.98707	450.767	4.32119	82.2984	0.78894	-1039	961	-9.96017	9.21244	-87	348.967	3.3453	296.954	2.84669	54.2161	0.51973	4	1039	0.03835	9.96017	0.96259	0.89845	0.03056	0.00558	0.81563	0.04763	0.0087	0.22088	0.655837
ctx-rh-temporalpole	1914.03	430.739	2157.63	260.365	243.6	11.9656	415.92	20.43	75.9363	3.72999	-578	1117	-28.3913	54.867	186.5	386.467	18.9832	282.613	13.8819	51.5979	2.53449	49	1117	2.40688	54.867	0.19117	0.72503	0.15028	0.02744	0.56866	0.15974	0.02916	0.00325	2.48789
ctx-rh-transversetemporal	916.467	211.647	938.233	212.511	21.7667	2.34719	108.947	11.7482	19.8909	2.14492	-269	175	-29.0074	18.871	48	88.5	9.54332	65.2474	7.0359	11.9125	1.28457	1	269	0.10783	29.0074	0.86724	0.81958	0.05309	0.00969	0.69431	0.06875	0.01255	0.28283	0.548479
wm-lh-bankssts	2796.1	565.526	2834.03	618.907	37.9333	1.34751	479.351	17.0281	87.5171	3.10888	-880	1226	-31.2604	43.5514	27.5	376.933	13.3898	290.324	10.3132	53.0056	1.88293	16	1226	0.56837	43.5514	0.68052	0.83585	0.08121	0.01483	0.71799	0.1124	0.02052	0.6679	0.175286
wm-lh-caudalanteriorcingulate	2622.3	488.642	3092.73	666.898	470.433	16.463	360.832	12.6275	65.8786	2.30545	-49	1676	-1.71478	58.6523	434	477.233	16.701	351.473	12.3	64.17	2.24565	5	1676	0.17498	58.6523	0.56166	0.79856	0.07036	0.01285	0.66467	0.09147	0.0167	0	7.22472
wm-lh-caudalmiddlefrontal	6710.03	882.824	6865.2	878.986	155.167	2.28603	520.592	7.66973	95.0466	1.40029	-476	1313	-7.01277	19.344	15.5	387.367	5.70696	375.094	5.52615	68.4825	1.00893	6	1313	0.0884	19.344	0.81657	0.89125	0.03669	0.0067	0.80383	0.05809	0.01061	0.11338	0.945463
wm-lh-cuneus	2263.13	306.039	2331.1	284.601	67.9667	2.95878	163.577	7.12098	29.865	1.30011	-198	565	-8.6195	24.5961	73	134.7	5.86387	112.989	4.91873	20.6289	0.89803	1	565	0.04353	24.5961	0.8273	0.84565	0.05715	0.01043	0.73258	0.07659	0.01398	0.03043	1.51676
wm-lh-entorhinal	770.233	232.146	835.633	210.359	65.4	8.14513	128.353	15.9856	23.434	2.91855	-232	270	-28.8941	33.6267	63	116.333	14.4885	83.061	10.3447	15.1648	1.88867	8	270	0.99635	33.6267	0.79799	0.73576	0.09348	0.01707	0.58198	0.11107	0.02028	0.0092	2.03615
wm-lh-frontalpole	153.767	37.9543	188.667	50.7668	34.9	20.3835	35.302	20.6183	6.44523	3.76437	-21	98	-12.2652	57.2374	32	39.4333	23.0312	29.9605	17.4986	5.47002	3.19479	3	98	1.75217	57.2374	0.47402	0.71333	0.13754	0.02511	0.5544	0.14601	0.02666	1e-05	5.09761
wm-lh-fusiform	6255.23	1117.47	6624.7	1149.44	369.467	5.73709	308.152	4.785	56.2606	0.87362	-374	967	-5.80748	15.0156	391.5	421.133	6.53937	229.568	3.56474	41.9132	0.65083	60	967	0.93168	15.0156	0.91341	0.86127	0.03095	0.00565	0.75634	0.04712	0.0086	0	6.44657
wm-lh-inferiorparietal	9152.8	1359.13	9320.27	1294.53	167.467	1.81309	799.457	8.65538	145.96	1.58025	-1942	1832	-21.0252	19.8343	241.5	620.467	6.71753	519.509	5.62451	94.849	1.02689	6	1942	0.06496	21.0252	0.81685	0.8968	0.0319	0.00583	0.81291	0.05006	0.00914	0.26062	0.583996
wm-lh-inferiortemporal	5434.73	804.696	5839.17	1080.84	404.433	7.17468	722.945	12.8251	131.991	2.34154	-531	3405	-9.41999	60.405	322.5	532.033	9.43832	631.693	11.2063	115.331	2.04598	14	3405	0.24836	60.405	0.64592	0.83837	0.03892	0.00711	0.72171	0.05479	0.01	0.00468	2.32943
wm-lh-insula	8954.3	1082.55	9478.07	1201.73	523.767	5.68312	591.946	6.4229	108.074	1.17266	-642	1795	-6.96601	19.4766	411.5	611.9	6.63941	496.849	5.39105	90.7118	0.98427	4	1795	0.0434	19.4766	0.77686	0.87183	0.02477	0.00452	0.77278	0.03819	0.00697	4e-05	4.41047
wm-lh-isthmuscingulate	3102.2	456.029	3740.63	590.808	638.433	18.6599	310.434	9.07325	56.6772	1.65654	-156	1133	-4.55951	33.1149	616.5	648.833	18.9639	287.263	8.39601	52.4467	1.5329	124	1133	3.62423	33.1149	0.34043	0.80165	0.03145	0.00574	0.66896	0.04283	0.00782	0	30
wm-lh-lateraloccipital	8404.67	1539.71	8528.8	1333.99	124.133	1.46613	671.056	7.9258	122.518	1.44705	-1635	1402	-19.3109	16.5589	55.5	513.4	6.06373	439.987	5.19666	80.3303	0.94878	37	1635	0.437	19.3109	0.89141	0.87798	0.03543	0.00647	0.7825	0.05508	0.01006	0.31935	0.495734
wm-lh-lateralorbitofrontal	6749.77	754.179	6880.2	902.767	130.433	1.91392	337.357	4.95023	61.5927	0.90378	-681	1036	-9.99269	15.2018	142.5	274.567	4.02887	231.134	3.39156	42.1991	0.61921	18	1036	0.26412	15.2018	0.90864	0.91579	0.0271	0.00495	0.84466	0.04389	0.00801	0.0429	1.36757
wm-lh-lingual	5353.53	803.075	5200.6	737.784	-152.933	-2.89807	471.797	8.94051	86.1379	1.63231	-1322	1146	-25.0518	21.7166	-103.5	351.467	6.66027	344.962	6.53701	62.9812	1.19349	33	1322	0.62535	25.0518	0.80074	0.86215	0.02871	0.00524	0.75769	0.0439	0.00802	0.08632	1.06388
wm-lh-medialorbitofrontal	3041.87	528.156	3438.73	557.616	396.867	12.2478	563.288	17.3838	102.842	3.17384	-964	1193	-29.7503	36.8176	468.5	590.8	18.2329	345.177	10.6526	63.0205	1.9449	80	1193	2.46891	36.8176	0.30019	0.78988	0.07875	0.01438	0.65272	0.1059	0.01933	0.00059	3.23217
wm-lh-middletemporal	4764.73	1039.27	5040.63	805.763	275.9	5.62753	601.792	12.2747	109.872	2.24105	-1643	1197	-33.5123	24.4152	359.5	526.833	10.7458	392.142	7.99851	71.5949	1.46032	1	1643	0.0204	33.5123	0.75803	0.80178	0.07566	0.01381	0.66914	0.09332	0.01704	0.01786	1.74811
wm-lh-paracentral	4186.43	693.609	4177.33	745.374	-9.1	-0.21761	453.562	10.8459	82.8087	1.98018	-798	642	-19.0823	15.3519	39.5	379.433	9.07326	238.475	5.70256	43.5393	1.04114	1	798	0.02391	19.0823	0.80746	0.87735	0.03532	0.00645	0.7815	0.05545	0.01012	0.91325	0.0394079
wm-lh-parahippocampal	1607.23	341.281	1452.2	243.723	-155.033	-10.1348	237.418	15.5204	43.3464	2.83362	-909	388	-59.4228	25.3642	-130	197.567	12.9153	202.121	13.213	36.9021	2.41235	4	909	0.26149	59.4228	0.57998	0.83726	0.05064	0.00925	0.72007	0.07376	0.01347	0.00125	2.90461
wm-lh-parsopercularis	3760.97	617.21	3717.57	571.209	-43.4	-1.16066	218.413	5.84107	39.8766	1.06643	-524	530	-14.0134	14.1739	-47	176.733	4.72642	131.685	3.52169	24.0423	0.64297	1	530	0.02674	14.1739	0.93215	0.89223	0.02476	0.00452	0.80544	0.03974	0.00725	0.2854	0.544549
wm-lh-parsorbitalis	959.733	275.881	914.033	188.05	-45.7	-4.87788	173.34	18.5018	31.6474	3.37795	-605	224	-64.5758	23.9091	-6.5	123.9	13.2247	127.776	13.6384	23.3286	2.49003	3	605	0.32021	64.5758	0.72206	0.82333	0.05666	0.01034	0.69972	0.07962	0.01454	0.15945	0.797382
wm-lh-parstriangularis	2989.4	579.97	2996.1	535.103	6.7	0.22387	285.785	9.54925	52.177	1.74345	-776	583	-25.9293	19.4804	59.5	225.167	7.52374	171.089	5.71678	31.2364	1.04374	39	776	1.30315	25.9293	0.87287	0.86608	0.04602	0.0084	0.7638	0.06659	0.01216	0.89871	0.0463783
wm-lh-pericalcarine	3004.77	562.29	3201.77	637.958	197	6.34815	278.798	8.98401	50.9013	1.64025	-716	667	-23.0725	21.4935	189.5	267	8.60384	210.067	6.76923	38.3528	1.23589	5	716	0.16112	23.0725	0.84628	0.86161	0.04321	0.00789	0.75686	0.06337	0.01157	0.00057	3.24535
wm-lh-postcentral	6966.5	1053.82	7030.07	1062.61	63.5667	0.90832	556.444	7.95115	101.592	1.45168	-1162	1742	-16.6041	24.8918	-18	401.567	5.73807	383.398	5.47846	69.9985	1.00022	14	1742	0.20005	24.8918	0.86437	0.8823	0.03009	0.00549	0.78939	0.04732	0.00864	0.5364	0.270509
wm-lh-posteriorcingulate	4602.23	725.511	4683.77	658.869	81.5333	1.75605	352.757	7.59761	64.4043	1.38713	-984	571	-21.1932	12.2981	145.5	276.8	5.96166	228.154	4.91393	41.655	0.89716	32	984	0.68921	21.1932	0.86801	0.86573	0.03243	0.00592	0.76324	0.04936	0.00901	0.2156	0.666347
wm-lh-precentral	13176.7	1831.14	13266.2	1959.81	89.5	0.67693	350.154	2.64838	63.929	0.48353	-694	822	-5.24906	6.21719	84	277.233	2.09685	226.684	1.71452	41.3866	0.31303	11	822	0.0832	6.21719	0.98242	0.92461	0.01654	0.00302	0.8598	0.02842	0.00519	0.17212	0.764159
wm-lh-precuneus	9376.1	1302.99	9451.1	1355.68	75	0.79672	396.379	4.2107	72.3685	0.76877	-748	734	-7.94595	7.79723	144	333.8	3.54593	218.335	2.31936	39.8624	0.42346	40	748	0.42492	7.94595	0.95546	0.92197	0.01826	0.00333	0.85524	0.03105	0.00567	0.3086	0.510609
wm-lh-rostralanteriorcingulate	2149.4	412.895	2981.43	622.525	832.033	32.4327	394.393	15.3734	72.0059	2.80679	289	1619	11.2652	63.1087	755	832.033	32.4327	394.393	15.3734	72.0059	2.80679	289	1619	11.2652	63.1087	0.06536	0.77391	0.06804	0.01242	0.6312	0.08964	0.01637	0	30
wm-lh-rostralmiddlefrontal	11926	2662.47	12656.9	2417.85	730.933	5.94669	702.117	5.71225	128.189	1.04291	-1209	1955	-9.83612	15.9054	707	862.133	7.0141	526.072	4.27999	96.0471	0.78141	5	1955	0.04068	15.9054	0.92339	0.91529	0.02024	0.0037	0.84381	0.0338	0.00617	0	5.43939
wm-lh-superiorfrontal	17983.9	2641.14	17752.1	2549.19	-231.8	-1.29729	600.305	3.35966	109.6	0.61339	-1600	559	-8.95456	3.1285	-229	514.467	2.87926	377.024	2.11005	68.8348	0.38524	30	1600	0.1679	8.95456	0.9702	0.92039	0.01769	0.00323	0.85253	0.02961	0.00541	0.04315	1.36506
wm-lh-superiorparietal	11337	1563.67	11654.2	1409.48	317.233	2.7596	542.716	4.72107	99.0859	0.86195	-679	1204	-5.9066	10.4736	294	516.967	4.49708	349.539	3.04063	63.8168	0.55514	67	1204	0.58283	10.4736	0.91393	0.90722	0.01988	0.00363	0.83019	0.03305	0.00603	0.0033	2.48084
wm-lh-superiortemporal	7329.3	1470.65	7256.97	1143.84	-72.3333	-0.9918	704.453	9.65913	128.615	1.76351	-2632	805	-36.0887	11.0378	80.5	512.333	7.02487	479.719	6.57767	87.5842	1.20091	0	2632	0	36.0887	0.86007	0.87965	0.02968	0.00542	0.78516	0.04595	0.00839	0.57816	0.23795
wm-lh-supramarginal	8207.2	1313.26	8284.97	1221.32	77.7667	0.94307	552.21	6.69663	100.819	1.22263	-989	879	-11.9936	10.6596	59.5	455.5	5.52383	310.736	3.76829	56.7325	0.68799	4	989	0.04851	11.9936	0.90641	0.90021	0.03595	0.00656	0.81853	0.05779	0.01055	0.44674	0.349946
wm-lh-temporalpole	489.3	141.193	590.867	91.3152	101.567	18.8057	118.696	21.9774	21.6708	4.0125	-152	374	-28.1438	69.2486	105	131.967	24.4345	82.125	15.206	14.9939	2.77622	2	374	0.37031	69.2486	0.279	0.69767	0.12933	0.02361	0.53571	0.1328	0.02425	6e-05	4.21782
wm-lh-transversetemporal	718.667	178.013	733.333	149.523	14.6667	2.0202	106.45	14.6625	19.435	2.677	-232	333	-31.9559	45.8678	9.5	77	10.6061	73.6253	10.1412	13.4421	1.85153	2	333	0.27548	45.8678	0.79303	0.80533	0.05464	0.00998	0.6741	0.07117	0.01299	0.45654	0.340517
wm-rh-bankssts	2880.8	477.479	2825.97	520.899	-54.8333	-1.9217	368.088	12.9001	67.2033	2.35522	-648	766	-22.7099	26.8453	-34	288.233	10.1015	229.468	8.04198	41.895	1.46826	23	766	0.80606	26.8453	0.73127	0.8203	0.07717	0.01409	0.69535	0.10457	0.01909	0.42119	0.375521
wm-rh-caudalanteriorcingulate	2686.47	583.366	3059.47	579.363	373	12.9831	272.288	9.47758	49.7127	1.73036	-422	1097	-14.6887	38.1835	368	401.133	13.9623	227.18	7.9075	41.4772	1.44371	15	1097	0.52211	38.1835	0.71679	0.81963	0.05343	0.00975	0.69438	0.07354	0.01343	0	30
wm-rh-caudalmiddlefrontal	5953.5	1122.31	6055.5	1089.12	102	1.69873	554.618	9.23671	101.259	1.68638	-962	1368	-16.0213	22.7829	187	465.333	7.74974	307.184	5.1159	56.0839	0.93403	63	1368	1.04921	22.7829	0.87417	0.88982	0.02688	0.00491	0.8015	0.04324	0.00789	0.32211	0.491991
wm-rh-cuneus	2248.43	370.966	2409.83	345.101	161.4	6.92962	296.104	12.713	54.0609	2.32107	-335	842	-14.383	36.1508	100.5	240.133	10.31	234.464	10.0666	42.807	1.83789	24	842	1.03043	36.1508	0.58697	0.84186	0.05782	0.01056	0.7269	0.08136	0.01485	0.0057	2.24403
wm-rh-entorhinal	633.167	173.675	700.867	167.449	67.7	10.1497	105.301	15.7868	19.2252	2.88227	-111	252	-16.6413	37.7802	78.5	103.9	15.5768	68.28	10.2366	12.4662	1.86894	0	252	0	37.7802	0.74627	0.74706	0.11934	0.02179	0.59624	0.13002	0.02374	0.00144	2.84135
wm-rh-frontalpole	202.267	43.4312	273.067	68.1388	70.8	29.7896	55.9559	23.5438	10.2161	4.2985	-35	209	-14.7265	87.9383	59.5	75.0667	31.5848	49.8722	20.9841	9.10538	3.83115	11	209	4.62833	87.9383	0.10508	0.6913	0.1245	0.02273	0.52824	0.13643	0.02491	0	6.92369
wm-rh-fusiform	6094	994.893	6447.47	1108.86	353.467	5.63677	285.491	4.55275	52.1233	0.83121	-326	927	-5.19875	14.783	366	383.6	6.11731	241.927	3.85804	44.1697	0.70438	32	927	0.51031	14.783	0.91067	0.86619	0.02774	0.00506	0.76397	0.04252	0.00776	0	6.7476
wm-rh-inferiorparietal	10805.7	1492.74	11094.1	1500.89	288.333	2.63321	589.764	5.38602	107.676	0.98335	-641	1972	-5.85393	18.0093	226.5	476.533	4.35194	445.993	4.07303	81.4269	0.74363	63	1972	0.57535	18.0093	0.90715	0.90151	0.02764	0.00505	0.82068	0.04496	0.00821	0.01207	1.91818
wm-rh-inferiortemporal	5250.9	1186.57	5452.53	1024.52	201.633	3.76764	482.164	9.00952	88.0307	1.64491	-612	1188	-11.4356	22.1985	248	425.7	7.95446	295.077	5.51369	53.8735	1.00666	8	1188	0.14948	22.1985	0.89273	0.83934	0.04169	0.00761	0.72315	0.0607	0.01108	0.02945	1.53088
wm-rh-insula	8580.9	1053.85	9284.2	1388.84	703.3	7.87345	603.001	6.75061	110.093	1.23249	-486	2039	-5.44078	22.8266	646	735.7	8.23617	561.587	6.28697	102.531	1.14784	14	2039	0.15673	22.8266	0.74209	0.85998	0.02559	0.00467	0.75436	0.03906	0.00713	0	6.27048
wm-rh-isthmuscingulate	3001	435.781	3514.67	539.538	513.667	15.7671	276.96	8.50135	50.5657	1.55213	120	1104	3.68343	33.8875	454.5	513.667	15.7671	276.96	8.50135	50.5657	1.55213	120	1104	3.68343	33.8875	0.44739	0.79342	0.04301	0.00785	0.65758	0.05661	0.01033	0	30
wm-rh-lateraloccipital	8363.9	1359.18	8567.53	1286.42	203.633	2.40539	538.2	6.3574	98.2613	1.1607	-1049	1534	-12.3911	18.1201	97	424.3	5.01198	382.514	4.51839	69.8371	0.82494	10	1534	0.11812	18.1201	0.90863	0.87696	0.03559	0.0065	0.78089	0.05442	0.00994	0.04723	1.32582
wm-rh-lateralorbitofrontal	6528.53	934.131	6951.83	1138.22	423.3	6.28024	492.136	7.30152	89.8514	1.33307	-334	1681	-4.95535	24.94	331	502.7	7.45825	407.601	6.04732	74.4174	1.10409	101	1681	1.49848	24.94	0.81661	0.90142	0.02638	0.00482	0.82054	0.04258	0.00777	6e-05	4.24745
wm-rh-lingual	5339.97	828.405	5510.97	833.538	171	3.1518	424.093	7.81671	77.4284	1.42713	-526	1182	-9.69502	21.7861	152.5	356.6	6.57271	280.278	5.16596	51.1715	0.94317	22	1182	0.4055	21.7861	0.85416	0.85422	0.02974	0.00543	0.74554	0.04485	0.00819	0.03527	1.45261
wm-rh-medialorbitofrontal	3205.2	532.067	3491.93	569.171	286.733	8.56287	240.77	7.19025	43.9585	1.31275	-250	648	-7.46588	19.3516	266.5	316.667	9.45678	198.207	5.91914	36.1874	1.08068	8	648	0.23891	19.3516	0.78638	0.8734	0.02522	0.0046	0.77525	0.0397	0.00725	0	6.44657
wm-rh-middletemporal	5424.9	882.303	5669.03	928.831	244.133	4.4012	531.823	9.58764	97.0972	1.75046	-623	1498	-11.2314	27.0057	160.5	446.067	8.04163	372.365	6.71294	67.9842	1.22561	0	1498	0	27.0057	0.80015	0.84378	0.04038	0.00737	0.72977	0.05917	0.0108	0.01773	1.75134
wm-rh-paracentral	5176.73	856.205	5095.13	994.129	-81.6	-1.58881	442.989	8.62528	80.8783	1.57475	-827	835	-16.1022	16.258	-145.5	380.333	7.40534	231.27	4.50298	42.2239	0.82213	19	835	0.36994	16.258	0.88593	0.89929	0.03425	0.00625	0.81701	0.05533	0.0101	0.32136	0.493015
wm-rh-parahippocampal	1684.3	369.785	1477.13	288.046	-207.167	-13.1059	244.755	15.4838	44.6859	2.82694	-702	484	-44.4102	30.619	-186.5	250.633	15.8557	198.292	12.5444	36.203	2.29029	12	702	0.75915	44.4102	0.58019	0.82414	0.06624	0.01209	0.70088	0.08825	0.01611	7e-05	4.15691
wm-rh-parsopercularis	3439.43	730.681	3326.43	672.929	-113	-3.3403	320.664	9.47886	58.5449	1.7306	-1167	349	-34.4967	10.3165	-58	251.933	7.44719	224.445	6.63461	40.9778	1.21131	6	1167	0.17736	34.4967	0.88686	0.8705	0.03428	0.00626	0.77069	0.05204	0.0095	0.06342	1.19776
wm-rh-parsorbitalis	1131.17	247.693	1188.77	261.54	57.6	4.96566	107.401	9.25899	19.6087	1.69045	-242	270	-20.8627	23.2765	69	99.2667	8.55772	69.0906	5.95626	12.6142	1.08746	17	270	1.46556	23.2765	0.88974	0.83836	0.04891	0.00893	0.7217	0.07108	0.01298	0.00642	2.19222
wm-rh-parstriangularis	3166	745.11	3317.2	636.548	151.2	4.66436	285.967	8.82177	52.2101	1.61063	-607	606	-18.7253	18.6945	224.5	267.2	8.24284	177.676	5.48113	32.4391	1.00071	4	607	0.1234	18.7253	0.89498	0.87724	0.03152	0.00575	0.78133	0.04892	0.00893	0.00712	2.14775
wm-rh-pericalcarine	3351.33	712.81	3390.6	688.895	39.2667	1.16485	239.761	7.11253	43.7742	1.29856	-433	595	-12.845	17.6507	40	180.933	5.3674	158.791	4.71056	28.9912	0.86003	17	595	0.50431	17.6507	0.94187	0.86451	0.0403	0.00736	0.76135	0.06043	0.01103	0.37709	0.423554
wm-rh-postcentral	6866.03	1095.6	6838.13	1022.45	-27.9	-0.40718	278.834	4.06933	50.9079	0.74296	-715	545	-10.4348	7.95379	-79.5	226.233	3.30167	160.023	2.33539	29.2161	0.42638	14	715	0.20432	10.4348	0.96617	0.8857	0.0263	0.0048	0.79484	0.04107	0.0075	0.58785	0.230732
wm-rh-posteriorcingulate	4243.5	645.185	4300.6	583.15	57.1	1.33659	298.724	6.99252	54.5393	1.27665	-534	614	-12.4999	14.3725	80.5	239.7	5.61089	182.13	4.2633	33.2523	0.77837	10	614	0.23408	14.3725	0.88166	0.85847	0.03441	0.00628	0.75204	0.05109	0.00933	0.30377	0.517458
wm-rh-precentral	13350.5	1882.86	13373.2	1913.97	22.6667	0.16964	363.32	2.71909	66.3329	0.49644	-832	1016	-6.22669	7.60375	-14.5	264.267	1.97777	245.536	1.83759	44.8286	0.3355	9	1016	0.06736	7.60375	0.98222	0.92838	0.01482	0.00271	0.86633	0.0253	0.00462	0.73503	0.133693
wm-rh-precuneus	9911.5	1389.32	10138.9	1593.94	227.367	2.26796	511.676	5.1039	93.4188	0.93184	-766	1714	-7.64076	17.0969	277.5	440.567	4.3946	338.376	3.37526	61.7787	0.61624	4	1714	0.0399	17.0969	0.93216	0.92032	0.02425	0.00443	0.8524	0.04039	0.00737	0.02133	1.67097
wm-rh-rostralanteriorcingulate	1587.53	247.344	2226.7	336.805	639.167	33.5148	230.224	12.0718	42.0329	2.204	214	1171	11.2211	61.4016	627	639.167	33.5148	230.224	12.0718	42.0329	2.204	214	1171	11.2211	61.4016	0	0.7471	0.04537	0.00828	0.59629	0.05828	0.01064	0	30
wm-rh-rostralmiddlefrontal	12267.4	2750.96	12876	2648.56	608.567	4.84077	740.144	5.88739	135.131	1.07488	-601	1960	-4.78058	15.5906	606.5	757.367	6.02439	580.993	4.62144	106.074	0.84376	7	1960	0.05568	15.5906	0.93903	0.91703	0.02071	0.00378	0.84678	0.0351	0.00641	0.0001	3.99761
wm-rh-superiorfrontal	18107.3	2602.17	17899	2413.31	-208.3	-1.15702	729.151	4.05012	133.124	0.73945	-1949	1677	-10.8259	9.31502	-228	585.567	3.25257	470.992	2.61616	85.9911	0.47764	32	1949	0.17775	10.8259	0.9558	0.92403	0.01183	0.00216	0.85879	0.02033	0.00371	0.1285	0.891098
wm-rh-superiorparietal	11134.7	1847.74	11260.7	1778.06	125.933	1.12464	857.381	7.65676	156.536	1.39793	-1379	2659	-12.315	23.746	174	636.333	5.68271	576.737	5.15049	105.297	0.94035	19	2659	0.16968	23.746	0.88945	0.90108	0.03271	0.00597	0.81997	0.05215	0.00952	0.42765	0.368907
wm-rh-superiortemporal	6260.13	978.398	6374.03	999.547	113.9	1.80305	438.94	6.94846	80.1392	1.26861	-580	1291	-9.18145	20.4367	169.5	337.9	5.34899	296.607	4.69531	54.1527	0.85724	3	1291	0.04749	20.4367	0.89834	0.89378	0.02184	0.00399	0.80795	0.03528	0.00644	0.1659	0.780149
wm-rh-supramarginal	8496.43	1303.5	8561.27	1497.13	64.8333	0.76017	439.767	5.15623	80.29	0.94139	-660	1613	-7.73844	18.9123	-22	285.433	3.34668	336.84	3.94942	61.4984	0.72106	0	1613	0	18.9123	0.95148	0.91183	0.02241	0.00409	0.83796	0.03701	0.00676	0.42596	0.370631
wm-rh-temporalpole	548.467	170.638	584.4	136.241	35.9333	6.34379	142.627	25.1798	26.0399	4.59717	-328	326	-57.9062	57.5531	48	108.267	19.1137	97.7354	17.2545	17.844	3.15023	0	328	0	57.9062	0.56329	0.70476	0.11867	0.02167	0.54412	0.1328	0.02425	0.17815	0.749201
wm-rh-transversetemporal	507.067	143.606	517.6	106.778	10.5333	2.05595	93.9445	18.3366	17.1518	3.34779	-219	225	-42.7456	43.9167	5.5	71.4	13.9362	60.5524	11.8189	11.0553	2.15783	14	225	2.7326	43.9167	0.72936	0.77053	0.07499	0.01369	0.62671	0.09248	0.01688	0.54392	0.264464
Brain Mask Volume	1582745	148440	1.52126e+06	165789	-61484.6	-3.96163	58786	3.78775	10732.8	0.69155	-180978	73307	-11.6609	4.72338	-73310.5	74802.7	4.81976	39725.4	2.55962	7252.84	0.46732	4615	180978	0.29736	11.6609	0.86133	0.97145	0.01176	0.00215	0.94448	0.02215	0.00404	0	5.47653
Brain Segmentation Volume	1.17334e+06	139781	1.18443e+06	145753	11087.3	0.94049	18669.2	1.58363	3408.51	0.28913	-25274	57656	-2.14389	4.89072	6313.5	15341	1.30131	15239.6	1.29271	2782.35	0.23602	272	57656	0.02307	4.89072	0.98874	0.97317	0.00656	0.0012	0.94774	0.01235	0.00226	0.0029	2.53785
Brain Segmentation Volume Without Ventricles	1.15327e+06	140385	1.16396e+06	146513	10695.1	0.9231	18679.7	1.61224	3410.43	0.29435	-25894	56889	-2.23491	4.91008	5606	15127.3	1.30564	15183.4	1.31048	2772.09	0.23926	738	56889	0.0637	4.91008	0.98904	0.97217	0.00702	0.00128	0.94585	0.01318	0.00241	0.00391	2.40832
Ventricles	17253	10350	17533.9	10423.6	280.9	1.61498	298.913	1.71854	54.5739	0.31376	-305	1378	-1.75354	7.92254	251	307.5	1.76791	270.477	1.55506	49.3822	0.28391	4	1378	0.023	7.92254	0.99923	0.95954	0.02007	0.00366	0.92222	0.03605	0.00658	2e-05	4.77294
Left Medial-inferior Temporal Gyrus	29281.6	4723.76	31172.7	4870.91	1891.1	6.2563	1838.69	6.08292	335.697	1.11058	-2839	5054	-9.39223	16.7201	1801.5	2251.97	7.45015	1354.3	4.48042	247.26	0.81801	9	5054	0.02977	16.7201	0.85673	0.89786	0.03161	0.00577	0.81465	0.04927	0.00899	0	5.3614
Right Medial-inferior Temporal Gyrus	30882	5812.08	31988.8	4964.16	1106.8	3.52088	1701.42	5.41244	310.636	0.98817	-2187	4103	-6.95713	13.0522	1361	1684.33	5.35808	1107.83	3.52414	202.26	0.64342	0	4103	0	13.0522	0.93179	0.90545	0.02875	0.00525	0.82724	0.04629	0.00845	0.00129	2.889
Left Superior Temporal Gyrus	19516	3304.22	19406.5	2490	-109.467	-0.56249	1648.13	8.46881	300.907	1.54619	-6815	2177	-35.0183	11.1863	-60.5	1110.2	5.70467	1205.69	6.19537	220.129	1.13111	74	6815	0.38024	35.0183	0.84555	0.9011	0.02607	0.00476	0.81999	0.0416	0.00759	0.71865	0.143478
Right Superior Temporal Gyrus	17651.1	2455.41	18228.4	2359.52	577.367	3.21837	934.964	5.21169	170.7	0.95152	-1051	3029	-5.8585	16.8843	614	864.367	4.81816	667.916	3.72311	121.944	0.67974	91	3029	0.50725	16.8843	0.8997	0.91822	0.01696	0.0031	0.84881	0.02882	0.00526	0.00207	2.68325
Left Temporal Lobe	80563.1	10934.6	83428	10381	2864.9	3.49397	2478.92	3.02324	452.587	0.55197	-1823	8372	-2.22329	10.2103	3004.5	3053.9	3.72447	2233.35	2.72374	407.751	0.49728	36	8372	0.0439	10.2103	0.93884	0.93222	0.02041	0.00373	0.87305	0.03454	0.00631	0	6.18333
Right Temporal Lobe	79173.7	11391.3	81673.5	10521.5	2499.83	3.10833	2453.39	3.05058	447.925	0.55696	-1453	9491	-1.80668	11.8013	1755.5	2678.97	3.33107	2249.32	2.79684	410.667	0.51063	127	9491	0.15791	11.8013	0.95044	0.93268	0.01871	0.00342	0.87385	0.03217	0.00587	1e-05	5.2953
v4.5.0 vs. v5.0.0
Struct	Mean1	sd1	Mean2	sd2	Mean diff	Mean diff %	sd Diff	sd Diff %	se Diff	se Diff %	min Diff	max Diff	min Diff %	max Diff %	median	Mean AbsDiff	Mean AbsDiff %	sd AbsDiff	sd AbsDiff %	se AbsDiff	se AbsDiff %	min AbsDiff	max AbsDiff	min AbsDiff %	max AbsDiff %	ICC(1,1)	SI	sd SI	se SI	OR	sd OR	se OR	p	-log10(p)
3rd-Ventricle	960.133	446.474	975.767	445.744	15.6333	1.6151	85.4435	8.82726	15.5998	1.61163	-189	281	-19.5258	29.0304	20	61.2333	6.32608	60.6185	6.26256	11.0674	1.14338	0	281	0	29.0304	0.98166	0.94085	0.04426	0.00808	0.88831	0.07328	0.01338	0.32456	0.488707
4th-Ventricle	1852.53	754.19	1951.37	750.084	98.8333	5.19642	131.257	6.90118	23.9642	1.25998	-139	484	-7.30829	25.4476	70.5	117.9	6.1989	113.814	5.98405	20.7794	1.09253	4	484	0.21031	25.4476	0.97674	0.92156	0.03083	0.00563	0.85454	0.05025	0.00918	0.00029	3.54475
5th-Ventricle	6.8	9.17418	4.76667	6.43098	-2.03333	-35.1585	5.59238	96.6982	1.02102	17.6546	-15	7	-259.366	121.037	0	3.7	63.977	4.6249	79.9694	0.84439	14.6003	0	15	0	259.366	0.72954	0.53602	0.34545	0.06307	0.36614	0.29452	0.05377	0.05592	1.25241
Brain-Stem	18088.1	2250.03	18801.8	2427.54	713.767	3.86971	570.115	3.0909	104.088	0.56432	-477	2292	-2.58607	12.4262	679	785.9	4.26079	461.654	2.50287	84.2861	0.45696	130	2292	0.7048	12.4262	0.92649	0.95047	0.00956	0.00175	0.90562	0.01727	0.00315	0	6.7476
CC_Anterior	963.6	171.144	913.867	171.055	-49.7333	-5.29792	54.5337	5.80929	9.95645	1.06063	-199	64	-21.1988	6.8177	-35.5	56.3333	6.00099	47.4315	5.05271	8.65977	0.92249	4	199	0.42611	21.1988	0.91047	0.88229	0.05911	0.01079	0.78937	0.09449	0.01725	3e-05	4.59024
CC_Central	485.167	124.237	438.033	89.4016	-47.1333	-10.2109	62.2984	13.4962	11.3741	2.46405	-283	26	-61.3085	5.63258	-26.5	49.2667	10.673	60.5668	13.1211	11.0579	2.39557	1	283	0.21664	61.3085	0.75593	0.87016	0.06695	0.01222	0.77016	0.1044	0.01906	0.00027	3.56814
CC_Mid_Anterior	513.4	132.905	476.367	119.1	-37.0333	-7.48325	50.8551	10.2762	9.28483	1.87616	-265	10	-53.548	2.02068	-23.5	38.2333	7.72573	49.928	10.0888	9.11556	1.84196	0	265	0	53.548	0.88084	0.87873	0.06886	0.01257	0.78368	0.10615	0.01938	0.00041	3.38443
CC_Mid_Posterior	471.3	102.502	437.633	98.8163	-33.6667	-7.40795	31.6809	6.971	5.78411	1.27272	-113	19	-24.8643	4.18072	-29	35.8	7.87737	29.1611	6.41656	5.32407	1.1715	4	113	0.88015	24.8643	0.89897	0.88829	0.06363	0.01162	0.79904	0.10006	0.01827	0	5.58127
CC_Posterior	915.5	164.828	891	170.391	-24.5	-2.71243	26.1939	2.89996	4.78233	0.52946	-110	15	-12.1783	1.66067	-19.5	26.3667	2.91909	24.2465	2.68437	4.42679	0.4901	0	110	0	12.1783	0.97763	0.90953	0.06536	0.01193	0.83407	0.10455	0.01909	2e-05	4.74471
CSF	1218.3	307.772	1162.77	266.206	-55.5333	-4.66458	96.5365	8.10868	17.6251	1.48043	-322	292	-27.0467	24.5268	-43.5	80.5333	6.76448	76.1599	6.39712	13.9048	1.16795	7	322	0.58797	27.0467	0.92758	0.90332	0.05585	0.0102	0.82369	0.08343	0.01523	0.00376	2.42465
Left-Accumbens-area	593.133	129.953	535.5	120.199	-57.6333	-10.2129	100.685	17.8419	18.3825	3.25748	-256	144	-45.3646	25.5176	-61.5	90.5667	16.0489	71.3334	12.6407	13.0236	2.30786	4	256	0.70882	45.3646	0.6003	0.78815	0.0942	0.0172	0.65037	0.12566	0.02294	0.00391	2.40746
Left-Amygdala	1775	345.385	1679.4	295.946	-95.6	-5.53497	143.282	8.29562	26.1596	1.51457	-472	198	-27.3275	11.4636	-100.5	140.933	8.15964	97.1447	5.62441	17.7361	1.02687	16	472	0.92635	27.3275	0.8627	0.87813	0.03076	0.00562	0.78273	0.04719	0.00862	0.00101	2.99432
Left-Caudate	3991.17	585.172	4074.03	606.87	82.8667	2.05492	167.612	4.15642	30.6016	0.75886	-168	773	-4.16605	19.1688	58.5	116.933	2.8997	145.095	3.59805	26.4906	0.65691	9	773	0.22318	19.1688	0.95233	0.93807	0.02513	0.00459	0.88337	0.04345	0.00793	0.01124	1.94942
Left-Cerebellum-Cortex	47494.2	6544.57	46849	8888.43	-645.133	-1.36763	4552.3	9.65052	831.133	1.76194	-18350	3751	-38.9005	7.95182	748	2875.93	6.09675	3549.34	7.52432	648.018	1.37375	62	18350	0.13144	38.9005	0.83197	0.88332	0.06018	0.01099	0.79103	0.08308	0.01517	0.44391	0.352704
Left-Cerebellum-White-Matter	16032.5	2649.78	14738.3	2825.87	-1294.27	-8.4123	1671.06	10.8613	305.092	1.983	-3626	2716	-23.5678	17.6531	-1486.5	1826.67	11.8727	1036.12	6.73446	189.169	1.22954	18	3626	0.11699	23.5678	0.7231	0.86953	0.03764	0.00687	0.76918	0.056	0.01022	0.00021	3.68501
Left-Hippocampus	4080.83	501.961	4041	513.414	-39.8333	-0.9809	157.024	3.86672	28.6686	0.70596	-300	306	-7.38749	7.53524	-34	130.7	3.21849	92.8789	2.28714	16.9573	0.41757	3	306	0.07387	7.53524	0.95073	0.91555	0.02348	0.00429	0.84425	0.039	0.00712	0.17528	0.75628
Left-Inf-Lat-Vent	391.9	321.501	361.167	313.012	-30.7333	-8.16218	55.2823	14.6819	10.0931	2.68054	-143	96	-37.9781	25.4958	-31.5	51.8	13.7571	35.4609	9.41773	6.47425	1.71944	8	143	2.12465	37.9781	0.98068	0.83932	0.0765	0.01397	0.72313	0.10327	0.01885	0.00491	2.30858
Left-Lateral-Ventricle	8775.13	6462.74	8961.17	6541.15	186.033	2.09777	210.053	2.36862	38.3503	0.43245	-141	964	-1.58996	10.8704	155	201.833	2.27594	194.378	2.19186	35.4883	0.40018	3	964	0.03383	10.8704	0.99909	0.96332	0.02022	0.00369	0.92924	0.03652	0.00667	4e-05	4.41583
Left-Pallidum	1759.83	249.104	1819	232.187	59.1667	3.30648	107.676	6.01739	19.6589	1.09862	-144	247	-8.04732	13.8034	51.5	96.5	5.39282	74.7141	4.17533	13.6409	0.76231	6	247	0.3353	13.8034	0.87484	0.87511	0.04673	0.00853	0.77795	0.07228	0.0132	0.00537	2.27018
Left-Putamen	6174.5	758.079	6090.2	795.493	-84.3	-1.37468	220.883	3.60193	40.3276	0.65762	-563	393	-9.18082	6.40864	-53.5	171.633	2.79882	160.21	2.61253	29.2502	0.47698	1	563	0.01631	9.18082	0.95516	0.92402	0.01988	0.00363	0.85877	0.03418	0.00624	0.04546	1.34237
Left-Thalamus-Proper	7209.3	866.832	7396.9	928.604	187.6	2.56877	339.913	4.65437	62.0594	0.84977	-296	1041	-4.05307	14.2542	112.5	286	3.91615	259.484	3.55306	47.3751	0.6487	2	1041	0.02739	14.2542	0.90985	0.93905	0.01913	0.00349	0.88511	0.03355	0.00613	0.00519	2.28456
Left-VentralDC	3887.03	432.978	4019.27	434.883	132.233	3.34501	208.773	5.28119	38.1166	0.96421	-302	575	-7.63948	14.5454	127.5	189.967	4.80545	156.023	3.9468	28.4857	0.72058	1	575	0.0253	14.5454	0.84499	0.88045	0.04814	0.00879	0.78642	0.07359	0.01344	0.00165	2.78176
Left-choroid-plexus	1628.87	342.898	1615.5	328.758	-13.3667	-0.82399	136.149	8.39292	24.8572	1.53233	-306	303	-18.8635	18.6785	-3.5	102.433	6.31453	88.6954	5.46766	16.1935	0.99825	0	306	0	18.8635	0.91973	0.8062	0.05207	0.00951	0.67532	0.07135	0.01303	0.59486	0.225586
Left-vessel	86.2333	51.2477	92.6333	55.2209	6.4	7.15617	17.8066	19.9105	3.25103	3.63514	-39	44	-43.6079	49.1987	6.5	14.0667	15.7287	12.44	13.9098	2.27123	2.53957	0	44	0	49.1987	0.93894	0.81476	0.08614	0.01573	0.68742	0.11285	0.0206	0.05862	1.23194
Optic-Chiasm	195.333	102.19	187.7	101.122	-7.63333	-3.98573	60.118	31.3905	10.976	5.73109	-167	89	-87.1987	46.4712	-2.5	47.0333	24.5584	37.2295	19.4393	6.79714	3.54911	1	167	0.52215	87.1987	0.82789	0.74545	0.22337	0.04078	0.5942	0.22989	0.04197	0.4923	0.307767
Right-Accumbens-area	696.267	109.803	636.467	104.594	-59.8	-8.97404	53.8461	8.08056	9.83092	1.4753	-172	36	-25.8116	5.40243	-58	64.5333	9.68436	47.8602	7.18227	8.73804	1.3113	1	172	0.15007	25.8116	0.74213	0.81482	0.06774	0.01237	0.6875	0.09361	0.01709	0	5.9025
Right-Amygdala	1809.6	336.748	1676.13	303.709	-133.467	-7.65788	113.237	6.49718	20.6742	1.18622	-417	115	-23.9261	6.59832	-131.5	144.933	8.3158	97.5719	5.59836	17.8141	1.02212	8	417	0.45901	23.9261	0.85906	0.88192	0.03046	0.00556	0.78878	0.04636	0.00846	0	6.32163
Right-Caudate	4060.37	581.373	4173.8	599.928	113.433	2.75519	205.508	4.9916	37.5205	0.91134	-83	963	-2.01599	23.3904	48.5	140.633	3.41585	187.309	4.54956	34.1979	0.83063	0	963	0	23.3904	0.92369	0.9376	0.0265	0.00484	0.88253	0.04525	0.00826	0.00519	2.28491
Right-Cerebellum-Cortex	47503.1	6987.75	48508.3	8814.84	1005.17	2.09385	2994.7	6.23822	546.756	1.13894	-6432	6291	-13.3984	13.1047	1212.5	2488.1	5.18292	1899.83	3.9575	346.859	0.72254	127	6432	0.26455	13.3984	0.92371	0.89889	0.02736	0.00499	0.81635	0.04452	0.00813	0.07626	1.11768
Right-Cerebellum-White-Matter	15827.2	2525.14	14949.2	2594.6	-878	-5.70567	1558.56	10.1282	284.552	1.84916	-4475	1361	-29.0807	8.84444	-647.5	1408.6	9.15377	1083.51	7.04116	197.82	1.28553	136	4475	0.88379	29.0807	0.76816	0.88058	0.0321	0.00586	0.78664	0.0506	0.00924	0.00444	2.35291
Right-Hippocampus	4184.33	489.937	4138.7	498.85	-45.6333	-1.09656	126.026	3.02837	23.0091	0.5529	-311	245	-7.47324	5.88728	-61	107.3	2.57839	78.2719	1.88085	14.2904	0.34339	7	311	0.16821	7.47324	0.96439	0.9243	0.02157	0.00394	0.85926	0.03629	0.00663	0.05688	1.24506
Right-Inf-Lat-Vent	337.867	291.237	328.233	282.407	-9.63333	-2.89246	41.4383	12.4421	7.56557	2.2716	-114	81	-34.2291	24.3207	-16	33.7	10.1186	25.2643	7.58575	4.61261	1.38496	0	114	0	34.2291	0.98935	0.87434	0.07616	0.01391	0.77674	0.10729	0.01959	0.21302	0.67158
Right-Lateral-Ventricle	7752.13	4219.73	7883.3	4255.58	131.167	1.67781	192.856	2.4669	35.2104	0.45039	-303	504	-3.87581	6.4469	110.5	184.3	2.35747	140.902	1.80235	25.7251	0.32906	7	504	0.08954	6.4469	0.99852	0.95984	0.02285	0.00417	0.92278	0.04036	0.00737	0.00084	3.07624
Right-Pallidum	1545.17	179.775	1567.5	177.899	22.3333	1.435	91.5993	5.88559	16.7237	1.07456	-164	238	-10.5376	15.2924	18	71.4667	4.59199	60.1898	3.86741	10.9891	0.70609	1	238	0.06425	15.2924	0.86564	0.87931	0.05008	0.00914	0.78462	0.076	0.01388	0.19212	0.716421
Right-Putamen	5869.53	709.09	5750.33	740.393	-119.2	-2.05166	175.143	3.01454	31.9765	0.55038	-366	333	-6.29956	5.73156	-196	184.4	3.17387	100.983	1.73811	18.4369	0.31733	5	366	0.08606	6.29956	0.95853	0.92617	0.0173	0.00316	0.86249	0.02983	0.00545	0.00083	3.07915
Right-Thalamus-Proper	7380.47	936.406	7543.8	880.481	163.333	2.18883	342.511	4.58998	62.5336	0.83801	-606	1070	-8.121	14.3391	109	277.667	3.72101	255.252	3.42064	46.6025	0.62452	29	1070	0.38863	14.3391	0.91579	0.94239	0.01684	0.00307	0.89106	0.02989	0.00546	0.01411	1.8504
Right-VentralDC	3878.17	425.3	3934.03	412.153	55.8667	1.43024	196.693	5.03553	35.9111	0.91936	-287	512	-7.34748	13.1077	11.5	151.867	3.88794	134.38	3.44027	24.5344	0.6281	1	512	0.0256	13.1077	0.88478	0.88396	0.04806	0.00878	0.79205	0.07415	0.01354	0.13063	0.883963
Right-choroid-plexus	1756.63	405.125	1734.07	371.785	-22.5667	-1.29296	181.24	10.3842	33.0897	1.89588	-326	622	-18.6782	35.6375	-53.5	128.7	7.37388	127.436	7.30144	23.2665	1.33306	2	622	0.11459	35.6375	0.89319	0.80633	0.0591	0.01079	0.67551	0.08095	0.01478	0.50066	0.300458
Right-vessel	64.4333	42.7839	70.9333	47.6799	6.5	9.60355	11.1965	16.5425	2.0442	3.02023	-17	34	-25.117	50.2339	6.5	10.0333	14.8239	8.05791	11.9053	1.47117	2.1736	1	34	1.47747	50.2339	0.96036	0.80867	0.10856	0.01982	0.67879	0.13674	0.02497	0.00349	2.45661
ctx-lh-bankssts	2453.13	438.782	2336.77	429.111	-116.367	-4.85883	306.51	12.7982	55.9608	2.33662	-838	499	-34.9903	20.8355	-120.5	250.233	10.4484	207.8	8.67657	37.9388	1.58412	1	838	0.04175	34.9903	0.72672	0.78444	0.0784	0.01431	0.64534	0.10351	0.0189	0.04653	1.3323
ctx-lh-caudalanteriorcingulate	1941.17	628.535	2011.6	720.603	70.4333	3.56375	245.353	12.4142	44.7951	2.26652	-361	845	-18.2657	42.7549	43	172.167	8.7112	186.189	9.42071	33.9934	1.71998	5	845	0.25299	42.7549	0.93104	0.79767	0.06944	0.01268	0.66344	0.09037	0.0165	0.12672	0.897161
ctx-lh-caudalmiddlefrontal	7031.4	1139.4	6945.93	951.958	-85.4667	-1.22293	671.107	9.60279	122.527	1.75322	-1285	1200	-18.3869	17.1707	-200	560.133	8.01488	365.202	5.22564	66.6765	0.95407	15	1285	0.21463	18.3869	0.79884	0.88574	0.04133	0.00755	0.79492	0.06305	0.01151	0.49102	0.308896
ctx-lh-cuneus	2861.8	399.197	2971.07	452.392	109.267	3.74659	353.493	12.1207	64.5386	2.21293	-328	1057	-11.2466	36.2429	34	243.867	8.36181	275.293	9.43937	50.2614	1.72339	1	1057	0.03429	36.2429	0.63922	0.79398	0.05187	0.00947	0.65835	0.06962	0.01271	0.10116	0.994973
ctx-lh-entorhinal	1644.27	313.505	1776.7	440.333	132.433	7.74245	326.025	19.0604	59.5237	3.47994	-483	945	-28.2376	55.2475	71.5	248.767	14.5436	245.798	14.3701	44.8764	2.62361	2	945	0.11693	55.2475	0.59794	0.70573	0.08194	0.01496	0.54527	0.09011	0.01645	0.03403	1.46814
ctx-lh-frontalpole	686.167	213.086	775.133	194.179	88.9667	12.1764	100.555	13.7624	18.3587	2.51266	-88	306	-12.0441	41.8805	83.5	106.9	14.6308	80.4836	11.0153	14.6942	2.01112	6	306	0.82119	41.8805	0.79644	0.78496	0.11165	0.02039	0.64604	0.12557	0.02293	4e-05	4.40981
ctx-lh-fusiform	9072.07	1737.55	9349.93	1654.84	277.867	3.01668	609.457	6.61662	111.271	1.20802	-539	2340	-5.8517	25.4044	165	460.533	4.99982	481.566	5.22816	87.9215	0.95453	5	2340	0.05428	25.4044	0.92465	0.83822	0.04219	0.0077	0.72149	0.06044	0.01103	0.01844	1.73414
ctx-lh-inferiorparietal	12006.6	2254.16	12237.3	2051.77	230.7	1.90316	841.745	6.94397	153.681	1.26779	-1585	2364	-13.0755	19.5018	147	642.367	5.2992	580.283	4.78704	105.945	0.87399	7	2364	0.05775	19.5018	0.92068	0.88866	0.03519	0.00642	0.79963	0.054	0.00986	0.14412	0.841263
ctx-lh-inferiortemporal	9243.4	2267.22	10064.8	2187.55	821.433	8.50863	838.813	8.68866	153.146	1.58632	-684	2404	-7.08506	24.9013	707.5	928.233	9.6149	714.352	7.39946	130.422	1.35095	14	2404	0.14502	24.9013	0.86783	0.81741	0.07299	0.01333	0.69121	0.09586	0.0175	1e-05	5.03439
ctx-lh-insula	6343.27	752.207	7073.17	927.539	729.9	10.8807	391.504	5.83619	71.4786	1.06554	61	2033	0.90933	30.3061	660	729.9	10.8807	391.504	5.83619	71.4786	1.06554	61	2033	0.90933	30.3061	0.59708	0.86638	0.02568	0.00469	0.76425	0.03905	0.00713	0	30
ctx-lh-isthmuscingulate	2427.47	428.457	2593.43	448.43	165.967	6.61103	223.626	8.90779	40.8283	1.62633	-361	521	-14.3799	20.7533	264.5	230.7	9.18959	153.119	6.09927	27.9556	1.11357	4	521	0.15933	20.7533	0.80914	0.80195	0.02889	0.00527	0.66939	0.03962	0.00723	0.00034	3.47467
ctx-lh-lateraloccipital	11740	2010.49	11714.7	1628.81	-25.2667	-0.21545	1106.98	9.43926	202.105	1.72337	-3766	1496	-32.1129	12.7565	148	750.533	6.39985	802.081	6.8394	146.439	1.2487	7	3766	0.05969	32.1129	0.82244	0.85921	0.0437	0.00798	0.75317	0.06455	0.01179	0.90137	0.0450971
ctx-lh-lateralorbitofrontal	7947.07	1134.64	8229.67	1337.71	282.6	3.49391	363.408	4.49297	66.3489	0.8203	-537	1060	-6.63916	13.1052	304.5	366.867	4.53573	274.681	3.39601	50.1497	0.62002	10	1060	0.12363	13.1052	0.93337	0.88891	0.02158	0.00394	0.80004	0.03396	0.0062	0.0002	3.70542
ctx-lh-lingual	6464.17	999.591	6301.13	1034.42	-163.033	-2.55432	387.627	6.07314	70.7707	1.1088	-1445	549	-22.6395	8.60144	-110	291.967	4.57438	299.278	4.68892	54.6404	0.85608	3	1445	0.047	22.6395	0.91739	0.84255	0.03738	0.00683	0.72794	0.05404	0.00987	0.0286	1.5436
ctx-lh-medialorbitofrontal	4303.77	727.513	5090.83	724.242	787.067	16.7557	667.513	14.2106	121.871	2.59448	-463	2192	-9.85673	46.6651	675	841.533	17.9153	594.82	12.663	108.599	2.31194	41	2192	0.87284	46.6651	0.22558	0.78306	0.05619	0.01026	0.64347	0.07318	0.01336	0	6.32163
ctx-lh-middletemporal	9875.33	1654.45	10228	1432.41	352.7	3.50887	669.636	6.66193	122.258	1.2163	-1310	2115	-13.0326	21.0413	345	584.967	5.81959	472.349	4.6992	86.2387	0.85795	35	2115	0.3482	21.0413	0.88483	0.83791	0.06524	0.01191	0.72104	0.08528	0.01557	0.00731	2.13588
ctx-lh-paracentral	4021.1	751.191	4023.07	736.478	1.96667	0.0489	418.143	10.3962	76.3421	1.89807	-769	733	-19.1194	18.2244	86.5	350.433	8.71273	218.654	5.43634	39.9206	0.99253	30	769	0.74588	19.1194	0.84687	0.86614	0.0343	0.00626	0.76389	0.05208	0.00951	0.97962	0.00894212
ctx-lh-parahippocampal	2298.23	420.122	2112.03	333.456	-186.2	-8.44393	303.027	13.7419	55.3249	2.50891	-801	335	-36.3243	15.1918	-118	283	12.8337	211.756	9.60285	38.6611	1.75323	12	801	0.54418	36.3243	0.5933	0.80594	0.06981	0.01275	0.67495	0.09182	0.01676	0.00217	2.66434
ctx-lh-parsopercularis	5088.63	677.923	5052.73	602.234	-35.9	-0.70799	318.908	6.28924	58.2243	1.14825	-670	531	-13.2132	10.472	-2	247.3	4.87705	199.422	3.93285	36.4093	0.71804	19	670	0.3747	13.2132	0.87872	0.88195	0.02957	0.0054	0.78883	0.04692	0.00857	0.54232	0.265745
ctx-lh-parsorbitalis	2451.23	578.358	2318.77	403.24	-132.467	-5.55416	295.261	12.3799	53.9071	2.26025	-943	279	-39.5388	11.6981	-76.5	235.533	9.87561	218.958	9.18064	39.9761	1.67615	11	943	0.46122	39.5388	0.79814	0.84204	0.04475	0.00817	0.72718	0.06585	0.01202	0.02022	1.69428
ctx-lh-parstriangularis	3683.77	861.132	3639	619.531	-44.7667	-1.22267	452.96	12.3713	82.6989	2.25868	-1427	857	-38.9743	23.4064	1	326.033	8.90465	311.902	8.5187	56.9453	1.5553	0	1427	0	38.9743	0.8216	0.85341	0.04771	0.00871	0.7443	0.06832	0.01247	0.59242	0.227371
ctx-lh-pericalcarine	2037.83	403.649	2134.2	386.156	96.3667	4.61965	293.554	14.0725	53.5955	2.56927	-526	1144	-25.2155	54.8414	81	199.167	9.5477	233.978	11.2165	42.7184	2.04784	11	1144	0.52732	54.8414	0.70631	0.79344	0.07455	0.01361	0.65761	0.09711	0.01773	0.08259	1.08307
ctx-lh-postcentral	10591.7	1651.09	10478	1652.65	-113.667	-1.07896	511.722	4.85743	93.4272	0.88684	-1457	1587	-13.8303	15.0643	-119	359.867	3.41597	375.84	3.56759	68.6186	0.65135	13	1587	0.1234	15.0643	0.95127	0.89797	0.02476	0.00452	0.81484	0.03992	0.00729	0.23355	0.631616
ctx-lh-posteriorcingulate	3693.9	700.3	3527	629.165	-166.9	-4.62269	339.666	9.40785	62.0142	1.71763	-1494	168	-41.3799	4.65316	-49.5	238.567	6.60767	292.083	8.08993	53.3268	1.47701	1	1494	0.0277	41.3799	0.84483	0.83796	0.03373	0.00616	0.72111	0.04806	0.00877	0.01169	1.93218
ctx-lh-precentral	14498	2008.66	14426.1	2094.81	-71.9333	-0.49739	467.383	3.23179	85.332	0.59004	-1092	1193	-7.55081	8.24919	-76	348.933	2.41275	312.804	2.16293	57.11	0.3949	16	1193	0.11063	8.24919	0.97431	0.91526	0.02208	0.00403	0.84375	0.03673	0.00671	0.40614	0.391325
ctx-lh-precuneus	10069.2	1499.36	10351.2	1528.77	282	2.76193	408.881	4.00462	74.6511	0.73114	-482	1186	-4.72075	11.6158	371.5	390.467	3.82427	302.866	2.9663	55.2956	0.54157	9	1186	0.08815	11.6158	0.94783	0.89155	0.01812	0.00331	0.80432	0.02888	0.00527	0.00073	3.13712
ctx-lh-rostralanteriorcingulate	2269.23	586.489	2813.2	731.922	543.967	21.4058	334.387	13.1585	61.0505	2.40241	-154	1072	-6.06009	42.1845	524	554.233	21.8098	316.467	12.4534	57.7787	2.27366	8	1072	0.31481	42.1845	0.60616	0.7851	0.05688	0.01038	0.64622	0.07364	0.01344	0	30
ctx-lh-rostralmiddlefrontal	16286.9	3675.45	17001.3	3644.76	714.467	4.29261	689.725	4.14396	125.926	0.75658	-548	2078	-3.29246	12.4849	604.5	796.267	4.78408	589.815	3.54369	107.685	0.64699	11	2078	0.06609	12.4849	0.96412	0.89797	0.0222	0.00405	0.81484	0.03634	0.00664	0	5.40518
ctx-lh-superiorfrontal	23751.3	2850.39	23690.5	2758.31	-60.8667	-0.2566	666.535	2.80991	121.692	0.51302	-1793	1068	-7.55874	4.50236	-22.5	523.067	2.20509	406.286	1.71277	74.1773	0.31271	14	1793	0.05902	7.55874	0.97246	0.92133	0.01323	0.00242	0.85413	0.02243	0.00409	0.62073	0.207098
ctx-lh-superiorparietal	13938.6	2102.53	14028.7	2006.8	90.1	0.64433	623.147	4.45627	113.771	0.8136	-1414	1197	-10.1118	8.56002	145	507.033	3.62591	361.611	2.58597	66.0209	0.47213	2	1414	0.0143	10.1118	0.95459	0.89753	0.01439	0.00263	0.81411	0.02363	0.00431	0.43482	0.361685
ctx-lh-superiortemporal	12000.2	1775.51	12149.5	1559.42	149.3	1.23645	625.001	5.17604	114.109	0.94501	-1003	2039	-8.3065	16.8863	143	473.767	3.92357	426.017	3.52812	77.7797	0.64414	3	2039	0.02484	16.8863	0.92845	0.89119	0.028	0.00511	0.80374	0.04385	0.00801	0.20101	0.696773
ctx-lh-supramarginal	11158.1	1634.38	11116.9	1691.24	-41.2333	-0.37022	774.076	6.95017	141.326	1.26892	-1798	1574	-16.1436	14.1324	-141	573.033	5.14507	511.138	4.58934	93.3206	0.83789	5	1798	0.04489	16.1436	0.89481	0.88928	0.03455	0.00631	0.80063	0.05494	0.01003	0.77255	0.112074
ctx-lh-temporalpole	1980.43	387.344	2455.67	328.584	475.233	21.4257	328.321	14.8023	59.943	2.70251	-239	1305	-10.7752	58.8355	443	491.167	22.1441	303.094	13.6649	55.3371	2.49485	36	1305	1.62305	58.8355	0.10587	0.74678	0.1429	0.02609	0.59589	0.14969	0.02733	0	30
ctx-lh-transversetemporal	1247.27	278.296	1197.4	250.547	-49.8667	-4.07963	121.651	9.9524	22.2104	1.81705	-481	164	-39.351	13.417	-28.5	88.4667	7.23752	96.3083	7.87906	17.5834	1.43851	0	481	0	39.351	0.88109	0.84001	0.05053	0.00923	0.72415	0.07171	0.01309	0.03255	1.48747
ctx-rh-bankssts	2385.17	421.65	2302.87	365.455	-82.3	-3.51107	313.536	13.376	57.2437	2.44212	-565	476	-24.1039	20.307	-104	279.567	11.9268	156.395	6.67209	28.5537	1.21815	22	565	0.93856	24.1039	0.67485	0.77872	0.07619	0.01391	0.63763	0.09552	0.01744	0.16122	0.792583
ctx-rh-caudalanteriorcingulate	2160.07	602.891	2149.3	534.174	-10.7667	-0.49969	253.096	11.7463	46.2088	2.14457	-826	656	-38.3351	30.4453	24.5	176.5	8.19146	178.748	8.2958	32.6348	1.5146	4	826	0.18564	38.3351	0.90423	0.80802	0.06521	0.01191	0.67788	0.0886	0.01618	0.8174	0.0875668
ctx-rh-caudalmiddlefrontal	6874.53	1484.04	6675.9	1261.76	-198.633	-2.93176	662.591	9.77963	120.972	1.78551	-1484	1357	-21.9034	20.0289	-255.5	563.767	8.32101	388.652	5.73637	70.9577	1.04731	47	1484	0.6937	21.9034	0.87815	0.88454	0.03217	0.00587	0.79298	0.05183	0.00946	0.1114	0.953129
ctx-rh-cuneus	3133.4	495.241	3280.67	475.224	147.267	4.59199	335.28	10.4545	61.2135	1.90873	-540	727	-16.838	22.6689	128	298	9.29208	207.321	6.46456	37.8514	1.18026	37	727	1.15371	22.6689	0.72847	0.80417	0.04153	0.00758	0.67248	0.05792	0.01057	0.02274	1.64324
ctx-rh-entorhinal	1618.2	395.834	1692.2	378.579	74	4.47076	355.774	21.4943	64.9552	3.92431	-1081	553	-65.3093	33.4099	136	280.267	16.9325	225.792	13.6414	41.2238	2.49056	19	1081	1.1479	65.3093	0.57479	0.70489	0.13119	0.02395	0.54427	0.13377	0.02442	0.26392	0.578524
ctx-rh-frontalpole	875.067	195.207	1027.83	212.92	152.767	16.0562	180.468	18.9676	32.9487	3.463	-177	512	-18.6032	53.8126	120.5	181.5	19.0761	150.442	15.8118	27.4668	2.88684	1	512	0.1051	53.8126	0.4203	0.77727	0.08486	0.01549	0.63568	0.1047	0.01912	7e-05	4.15728
ctx-rh-fusiform	8617.6	1389.28	9161.03	1570.04	543.433	6.11333	625.749	7.03934	114.246	1.2852	-276	2780	-3.10485	31.2735	518	595.767	6.70205	574.358	6.46122	104.863	1.17965	3	2780	0.03375	31.2735	0.85146	0.84278	0.03803	0.00694	0.72828	0.05626	0.01027	5e-05	4.302
ctx-rh-inferiorparietal	14711.2	2478.34	14822.5	2419.55	111.3	0.75372	717.802	4.8609	131.052	0.88747	-1304	1393	-8.83059	9.43329	186	591.9	4.0083	406.974	2.756	74.3029	0.50317	5	1393	0.03386	9.43329	0.95744	0.90397	0.02069	0.00378	0.82477	0.03377	0.00616	0.40268	0.395039
ctx-rh-inferiortemporal	9180.87	2745.19	9779.47	2207.98	598.6	6.31423	905.215	9.54852	165.269	1.74331	-1893	2206	-19.968	23.2696	763	931.933	9.83035	540.041	5.69654	98.5976	1.04004	158	2206	1.66664	23.2696	0.90853	0.83159	0.05796	0.01058	0.71173	0.08232	0.01503	0.0011	2.9568
ctx-rh-insula	6069.7	802.81	6764.4	1088.89	694.7	10.8259	426.07	6.63966	77.7894	1.21223	-77	1693	-1.19993	26.3828	528	699.833	10.9058	417.289	6.50282	76.1862	1.18725	77	1693	1.19993	26.3828	0.68185	0.86125	0.02291	0.00418	0.75632	0.03553	0.00649	0	30
ctx-rh-isthmuscingulate	2301.67	446.533	2502.93	450.258	201.267	8.37808	268.102	11.1602	48.9484	2.03757	-407	809	-16.9421	33.6761	205.5	270.467	11.2586	195.215	8.12617	35.6412	1.48363	29	809	1.20718	33.6761	0.73885	0.78325	0.04337	0.00792	0.64372	0.05722	0.01045	0.0003	3.53011
ctx-rh-lateraloccipital	11438.7	1661.71	11421.8	1676.06	-16.8667	-0.14756	577.801	5.05501	105.491	0.92291	-1089	1246	-9.52734	10.9009	-12	437.733	3.8296	368.687	3.22553	67.3127	0.5889	4	1246	0.03499	10.9009	0.94196	0.86852	0.03893	0.00711	0.76759	0.05815	0.01062	0.87408	0.0584474
ctx-rh-lateralorbitofrontal	7478.53	1026.29	7884.33	1265.84	405.8	5.28287	502.271	6.53876	91.7016	1.19381	-820	1347	-10.6751	17.5358	387.5	518.533	6.75048	380.104	4.94835	69.3972	0.90344	8	1347	0.10415	17.5358	0.85056	0.87427	0.02443	0.00446	0.77662	0.03743	0.00683	0.00012	3.90374
ctx-rh-lingual	6319.93	895.561	6492.37	740.437	172.433	2.69168	434.417	6.78125	79.3133	1.23808	-615	1047	-9.60015	16.3437	161	368.7	5.75541	280.801	4.3833	51.267	0.80028	20	1047	0.3122	16.3437	0.84423	0.83987	0.02747	0.00502	0.72394	0.04015	0.00733	0.038	1.42018
ctx-rh-medialorbitofrontal	4749.17	783.609	5189.87	866.904	440.7	8.86807	291.477	5.8653	53.2162	1.07085	-45	1350	-0.90552	27.1656	425	443.7	8.92843	286.73	5.76978	52.3496	1.05341	0	1350	0	27.1656	0.81089	0.85057	0.02185	0.00399	0.74	0.03284	0.006	0	30
ctx-rh-middletemporal	10809.8	1601.61	11087.7	1428.7	277.967	2.5388	639.244	5.83851	116.709	1.06596	-705	1640	-6.43909	14.9789	309.5	554.1	5.06085	413.459	3.77631	75.4869	0.68946	38	1640	0.34707	14.9789	0.89818	0.86194	0.04042	0.00738	0.75738	0.05956	0.01087	0.02401	1.61954
ctx-rh-paracentral	4595.33	756.518	4545.2	799.484	-50.1333	-1.09695	471.508	10.3169	86.0852	1.88359	-944	885	-20.6552	19.3643	-31	372.8	8.15707	284.864	6.23299	52.0089	1.13798	5	944	0.1094	20.6552	0.82017	0.87053	0.03452	0.0063	0.77073	0.05248	0.00958	0.56482	0.248091
ctx-rh-parahippocampal	2160.27	359.226	1964.9	312.935	-195.367	-9.47194	212.451	10.3002	38.788	1.88055	-603	230	-29.2352	11.1511	-179	234.767	11.3822	166.143	8.05511	30.3335	1.47066	3	603	0.14545	29.2352	0.66654	0.80499	0.04694	0.00857	0.67363	0.06393	0.01167	2e-05	4.64039
ctx-rh-parsopercularis	4242.8	940.154	4112.83	741.489	-129.967	-3.11088	414.59	9.9236	75.6934	1.81179	-1624	642	-38.872	15.3669	-70	289.1	6.91988	320.777	7.67809	58.5655	1.40182	12	1624	0.28723	38.872	0.87282	0.86452	0.04024	0.00735	0.76137	0.06028	0.01101	0.09664	1.01484
ctx-rh-parsorbitalis	2751.57	405.656	2804.33	416.71	52.7667	1.89948	224.465	8.08023	40.9815	1.47524	-410	666	-14.7591	23.9745	29	169.033	6.08482	153.971	5.54263	28.1112	1.01194	10	666	0.35998	23.9745	0.84801	0.85437	0.059	0.01077	0.74577	0.08139	0.01486	0.20808	0.681782
ctx-rh-parstriangularis	4243.83	897.265	4434.33	811.208	190.5	4.39033	329.317	7.58956	60.1248	1.38566	-343	824	-7.9049	18.9902	247.5	320.767	7.3925	198.877	4.58339	36.3099	0.83681	11	824	0.25351	18.9902	0.90461	0.87304	0.03578	0.00653	0.77469	0.0544	0.00993	0.0036	2.44408
ctx-rh-pericalcarine	2511.17	504.697	2410.9	401.837	-100.267	-4.07417	266.061	10.8109	48.5758	1.9738	-678	354	-27.5494	14.3842	-99.5	220.4	8.95559	175.889	7.14697	32.1129	1.30485	6	678	0.2438	27.5494	0.81316	0.81084	0.04902	0.00895	0.68186	0.06839	0.01249	0.04805	1.31827
ctx-rh-postcentral	9757.07	1456.16	9662.4	1386.21	-94.6667	-0.97497	312.242	3.21576	57.0073	0.58712	-831	747	-8.55842	7.69331	-38.5	230.733	2.37631	227.359	2.34156	41.5099	0.42751	13	831	0.13389	8.55842	0.97448	0.90047	0.02379	0.00434	0.81896	0.03798	0.00693	0.10757	0.968316
ctx-rh-posteriorcingulate	3515.8	627.196	3351.47	580.458	-164.333	-4.78599	218.493	6.3633	39.8911	1.16178	-745	259	-21.6971	7.54303	-176	211.133	6.14898	171.934	5.00734	31.3907	0.91421	18	745	0.52423	21.6971	0.90155	0.8372	0.03025	0.00552	0.71998	0.04409	0.00805	0.00029	3.53925
ctx-rh-precentral	13981	1822.42	13883.1	1781.08	-97.8667	-0.70246	418.177	3.00155	76.3483	0.54801	-1177	545	-8.44816	3.91185	-115.5	317	2.27533	284.299	2.04062	51.9057	0.37256	6	1177	0.04307	8.44816	0.9725	0.91721	0.01907	0.00348	0.84709	0.03182	0.00581	0.21005	0.677673
ctx-rh-precuneus	10750.1	1687.11	11073.1	1775.87	322.967	2.95985	494.543	4.53228	90.2908	0.82748	-1046	1331	-9.58614	12.1981	428.5	492.167	4.5105	319.213	2.92545	58.28	0.53411	3	1331	0.02749	12.1981	0.94366	0.88854	0.02206	0.00403	0.79944	0.03508	0.00641	0.00124	2.90501
ctx-rh-rostralanteriorcingulate	1802.43	418.867	2307.43	563.182	505	24.575	270.948	13.1852	49.4681	2.40728	112	1293	5.4503	62.9218	453.5	505	24.575	270.948	13.1852	49.4681	2.40728	112	1293	5.4503	62.9218	0.47328	0.75107	0.05564	0.01016	0.60137	0.06899	0.0126	0	30
ctx-rh-rostralmiddlefrontal	16431	3217.69	17041.9	3111.13	610.933	3.65032	983.132	5.8742	179.495	1.07248	-1751	2130	-10.4622	12.7267	790	939.267	5.61211	663.337	3.96343	121.108	0.72362	7	2130	0.04182	12.7267	0.93528	0.89688	0.02284	0.00417	0.81304	0.03748	0.00684	0.00196	2.70734
ctx-rh-superiorfrontal	23669.6	3718.39	23457.8	3482.67	-211.8	-0.89884	754.932	3.20379	137.831	0.58493	-1437	2173	-6.09835	9.2218	-297	606.067	2.57203	486.153	2.06314	88.7591	0.37668	7	2173	0.02971	9.2218	0.97706	0.92447	0.01051	0.00192	0.85955	0.01807	0.0033	0.13522	0.868971
ctx-rh-superiorparietal	14131.2	2281.76	14089.6	2329.88	-41.6	-0.29482	708.788	5.02316	129.406	0.9171	-1619	1530	-11.4738	10.8431	-11.5	528.733	3.74712	463.651	3.28588	84.6507	0.59992	19	1619	0.13465	11.4738	0.95414	0.89651	0.02809	0.00513	0.81243	0.04419	0.00807	0.75016	0.124847
ctx-rh-superiortemporal	11491.4	1743.97	11854.4	1586.53	362.967	3.10948	588.99	5.04578	107.534	0.92123	-785	1457	-6.72497	12.4819	425.5	567.7	4.86339	387.04	3.31571	70.6636	0.60536	6	1457	0.0514	12.4819	0.91687	0.90752	0.01982	0.00362	0.8307	0.0328	0.00599	0.00211	2.67537
ctx-rh-supramarginal	10458.5	1591.09	10380.1	1699.51	-78.4667	-0.75309	489.106	4.69423	89.2981	0.85704	-1039	961	-9.97188	9.22327	-134.5	409.133	3.92669	269.131	2.58301	49.1364	0.47159	21	1039	0.20155	9.97188	0.95619	0.8978	0.03094	0.00565	0.81456	0.04789	0.00874	0.38678	0.412532
ctx-rh-temporalpole	1870.6	487.674	2157.63	260.365	287.033	14.2511	427.153	21.2079	77.987	3.87202	-578	1062	-28.6974	52.7278	231.5	398.633	19.792	321.404	15.9575	58.68	2.91344	11	1062	0.54615	52.7278	0.24727	0.72573	0.14432	0.02635	0.56952	0.15212	0.02777	0.00095	3.02442
ctx-rh-transversetemporal	909.5	205.205	938.233	212.511	28.7333	3.11012	113.973	12.3365	20.8085	2.25233	-379	207	-41.0232	22.4058	36.5	86.9333	9.40973	77.6268	8.40239	14.1727	1.53406	1	379	0.10824	41.0232	0.847	0.82241	0.04871	0.00889	0.69839	0.06439	0.01176	0.17788	0.749879
wm-lh-bankssts	2786.47	536.993	2834.03	618.907	47.5667	1.69261	461.797	16.4326	84.3122	3.00017	-797	1080	-28.3605	38.4307	-52.5	377.967	13.4496	260.408	9.26636	47.5438	1.6918	16	1080	0.56934	38.4307	0.68847	0.83531	0.07931	0.01448	0.7172	0.11273	0.02058	0.57697	0.238845
wm-lh-caudalanteriorcingulate	2632.33	501.099	3092.73	666.898	460.4	16.0837	357.944	12.5045	65.3514	2.28299	-138	1436	-4.8209	50.1653	450.5	474.8	16.5867	337.925	11.8051	61.6963	2.1553	8	1436	0.27947	50.1653	0.58007	0.80261	0.05145	0.00939	0.6703	0.06917	0.01263	0	6.92369
wm-lh-caudalmiddlefrontal	6621.1	870.05	6865.2	878.986	244.1	3.61997	482.69	7.15822	88.1267	1.30691	-476	1217	-7.05902	18.0479	193.5	415.7	6.16477	340.387	5.0479	62.146	0.92162	13	1217	0.19279	18.0479	0.8169	0.88837	0.04356	0.00795	0.79916	0.06582	0.01202	0.00968	2.01414
wm-lh-cuneus	2207.57	271.102	2331.1	284.601	123.533	5.4436	198.146	8.73147	36.1764	1.59414	-281	561	-12.3825	24.7209	98.5	176.733	7.7879	150.788	6.64458	27.5299	1.21313	13	561	0.57286	24.7209	0.67044	0.83236	0.05302	0.00968	0.71286	0.07459	0.01362	0.00191	2.71992
wm-lh-entorhinal	767.8	234.054	835.633	210.359	67.8333	8.46101	136.59	17.0372	24.9379	3.11056	-219	312	-27.3164	38.9165	77.5	126.1	15.7287	83.471	10.4115	15.2396	1.90088	3	312	0.3742	38.9165	0.77593	0.73035	0.09166	0.01674	0.57524	0.10481	0.01913	0.01091	1.96209
wm-lh-frontalpole	154.633	44.3267	188.667	50.7668	34.0333	19.8272	33.173	19.3259	6.05653	3.52842	-21	94	-12.2342	54.7626	31.5	38.1	22.1963	28.231	16.4468	5.15425	3.00277	1	94	0.58258	54.7626	0.56456	0.73094	0.12693	0.02317	0.57598	0.13653	0.02493	0	5.34391
wm-lh-fusiform	6328	1097.7	6624.7	1149.44	296.7	4.58128	326.528	5.04184	59.6155	0.92051	-309	870	-4.77121	13.4335	306.5	374.5	5.78258	229.347	3.54131	41.8729	0.64655	39	870	0.60219	13.4335	0.9256	0.86191	0.02877	0.00525	0.75732	0.04448	0.00812	3e-05	4.56767
wm-lh-inferiorparietal	9052.17	1350.45	9320.27	1294.53	268.1	2.9185	726.072	7.90393	132.562	1.44305	-1170	2109	-12.7365	22.9583	167	563.433	6.13346	522.621	5.68919	95.4171	1.0387	5	2109	0.05443	22.9583	0.83512	0.89329	0.03583	0.00654	0.80717	0.05598	0.01022	0.05244	1.28035
wm-lh-inferiortemporal	5566.67	1015.24	5839.17	1080.84	272.5	4.77826	492.351	8.63333	89.8907	1.57622	-909	1125	-15.9392	19.7267	285	463.367	8.12508	311.632	5.46443	56.8959	0.99766	26	1125	0.45591	19.7267	0.86175	0.85003	0.03626	0.00662	0.73917	0.05278	0.00964	0.00508	2.29386
wm-lh-insula	8893	1036.09	9478.07	1201.73	585.067	6.36944	647.473	7.04883	118.212	1.28693	-431	2096	-4.69216	22.8185	455.5	662.733	7.21497	564.771	6.14849	103.113	1.12256	7	2096	0.07621	22.8185	0.72125	0.87216	0.02542	0.00464	0.7733	0.03918	0.00715	3e-05	4.53453
wm-lh-isthmuscingulate	3129.27	479.054	3740.63	590.808	611.367	17.7984	298.949	8.70316	54.5804	1.58897	-38	1113	-1.10628	32.4022	619	613.9	17.8722	293.53	8.54538	53.5909	1.56017	38	1113	1.10628	32.4022	0.39765	0.80294	0.02609	0.00476	0.67076	0.03635	0.00664	0	30
wm-lh-lateraloccipital	8461.07	1637.86	8528.8	1333.99	67.7333	0.79734	974.001	11.4657	177.827	2.09333	-3599	1455	-42.3664	17.1279	250.5	630.933	7.42717	735.948	8.66338	134.365	1.58171	14	3599	0.1648	42.3664	0.79282	0.87287	0.04547	0.0083	0.77442	0.06664	0.01217	0.70606	0.151161
wm-lh-lateralorbitofrontal	6748.43	760.847	6880.2	902.767	131.767	1.93367	298.209	4.37621	54.4453	0.79898	-533	802	-7.82177	11.7693	163.5	270.167	3.96469	177.152	2.59971	32.3434	0.47464	47	802	0.68972	11.7693	0.92625	0.91558	0.02608	0.00476	0.84431	0.04207	0.00768	0.02201	1.65743
wm-lh-lingual	5334.17	748.246	5200.6	737.784	-133.567	-2.53573	377.526	7.16723	68.9264	1.30855	-1103	658	-20.9402	12.492	-172	312.767	5.9378	244.509	4.64194	44.641	0.8475	4	1103	0.07594	20.9402	0.8599	0.86003	0.03476	0.00635	0.75443	0.05205	0.0095	0.06244	1.20455
wm-lh-medialorbitofrontal	3016.67	525.744	3438.73	557.616	422.067	13.0764	578.158	17.9124	105.557	3.27034	-965	1193	-29.8974	36.9613	481	607.867	18.8328	369.196	11.4384	67.4057	2.08835	63	1193	1.95185	36.9613	0.25278	0.78652	0.07812	0.01426	0.64816	0.10519	0.0192	0.0004	3.39606
wm-lh-middletemporal	4663.3	881.07	5040.63	805.763	377.333	7.77692	430.539	8.87349	78.6053	1.62007	-582	1314	-11.9951	27.0818	376.5	479.933	9.89152	307.205	6.33156	56.0878	1.15598	43	1314	0.88624	27.0818	0.78471	0.81584	0.06111	0.01116	0.68896	0.07849	0.01433	4e-05	4.3549
wm-lh-paracentral	4150.83	722.884	4177.33	745.374	26.5	0.63639	450.035	10.8075	82.1647	1.97318	-798	766	-19.1639	18.3954	81.5	374.567	8.99518	241.08	5.7895	44.0149	1.05701	7	798	0.1681	19.1639	0.81725	0.87577	0.03774	0.00689	0.779	0.05914	0.0108	0.74937	0.125303
wm-lh-parahippocampal	1628.87	350.267	1452.2	243.723	-176.667	-11.4679	232.27	15.0772	42.4064	2.75271	-820	306	-53.2283	19.8633	-132.5	208.933	13.5624	202.677	13.1563	37.0037	2.402	2	820	0.12983	53.2283	0.5764	0.83421	0.05599	0.01022	0.71558	0.07918	0.01446	0.00025	3.59439
wm-lh-parsopercularis	3748.63	581.261	3717.57	571.209	-31.0667	-0.83219	202.446	5.42299	36.9613	0.9901	-411	300	-11.0096	8.03622	7.5	167.867	4.49671	113.277	3.0344	20.6815	0.554	1	411	0.02679	11.0096	0.93888	0.89017	0.02986	0.00545	0.80208	0.04716	0.00861	0.40749	0.389879
wm-lh-parsorbitalis	966.933	259.427	914.033	188.05	-52.9	-5.62477	153.109	16.2799	27.9538	2.97228	-550	210	-58.4806	22.3289	-11	111.833	11.891	115.756	12.3081	21.1341	2.24715	3	550	0.31898	58.4806	0.75443	0.81873	0.05887	0.01075	0.69309	0.08285	0.01513	0.06846	1.16457
wm-lh-parstriangularis	2932.9	575.2	2996.1	535.103	63.2	2.13189	261.525	8.82189	47.7477	1.61065	-776	471	-26.1764	15.888	93.5	207.733	7.00736	166.991	5.63304	30.4883	1.02845	18	776	0.60719	26.1764	0.88656	0.86715	0.04253	0.00776	0.76546	0.06129	0.01119	0.19597	0.707813
wm-lh-pericalcarine	2968.77	552.132	3201.77	637.958	233	7.55202	360.093	11.6714	65.7437	2.13089	-482	1383	-15.6226	44.8259	203.5	316.4	10.2552	286.822	9.29652	52.3664	1.6973	5	1383	0.16206	44.8259	0.75621	0.85227	0.05723	0.01045	0.74256	0.08218	0.015	0.00136	2.86728
wm-lh-postcentral	7024.93	999.127	7030.07	1062.61	5.13333	0.07305	568.918	8.0956	103.87	1.47805	-1162	1742	-16.535	24.7883	18.5	397.6	5.65777	400.198	5.69474	73.0657	1.03971	14	1742	0.19922	24.7883	0.85254	0.88148	0.02929	0.00535	0.78808	0.04594	0.00839	0.96092	0.017311
wm-lh-posteriorcingulate	4611.53	672.745	4683.77	658.869	72.2333	1.55419	344.099	7.40372	62.8236	1.35173	-984	684	-21.172	14.7171	126	273.3	5.88039	215.715	4.64138	39.384	0.8474	0	984	0	21.172	0.86513	0.86668	0.0285	0.0052	0.76473	0.04341	0.00793	0.25963	0.585646
wm-lh-precentral	13299.7	1907.49	13266.2	1959.81	-33.5667	-0.2527	432.402	3.25531	78.9454	0.59434	-1395	619	-10.5022	4.66011	56.5	316.033	2.37924	291.231	2.19252	53.1713	0.4003	11	1395	0.08281	10.5022	0.97568	0.92163	0.01696	0.0031	0.85465	0.02878	0.00525	0.67384	0.171446
wm-lh-precuneus	9334.9	1318.3	9451.1	1355.68	116.2	1.23709	350.435	3.73081	63.9805	0.68115	-649	702	-6.9094	7.47365	151.5	306.333	3.26129	199.241	2.12117	36.3763	0.38727	20	702	0.21292	7.47365	0.96307	0.9213	0.01784	0.00326	0.85408	0.03024	0.00552	0.07969	1.09857
wm-lh-rostralanteriorcingulate	2188.97	406.2	2981.43	622.525	792.467	30.654	382.856	14.8095	69.8997	2.70384	257	1662	9.9412	64.289	720	792.467	30.654	382.856	14.8095	69.8997	2.70384	257	1662	9.9412	64.289	0.10924	0.77851	0.06032	0.01101	0.63734	0.08056	0.01471	0	30
wm-lh-rostralmiddlefrontal	12017	2641.83	12656.9	2417.85	639.9	5.18686	699.452	5.66957	127.702	1.03512	-1050	1931	-8.51102	15.6522	667.5	789.167	6.39677	518.233	4.20065	94.6159	0.76693	5	1931	0.04053	15.6522	0.93224	0.91696	0.0201	0.00367	0.84666	0.03371	0.00615	2e-05	4.60877
wm-lh-superiorfrontal	18014.5	2709.61	17752.1	2549.19	-262.433	-1.46748	715.41	4.00043	130.615	0.73038	-1641	978	-9.17615	5.46878	-109.5	591.3	3.30643	470.495	2.63092	85.9003	0.48034	12	1641	0.0671	9.17615	0.95935	0.91878	0.01491	0.00272	0.84976	0.02493	0.00455	0.0539	1.26838
wm-lh-superiorparietal	11334.1	1647.67	11654.2	1409.48	320.1	2.78489	553.355	4.81422	101.028	0.87895	-668	1389	-5.81164	12.0844	351.5	530.7	4.61712	347.627	3.02437	63.4677	0.55217	25	1389	0.2175	12.0844	0.91607	0.90843	0.01609	0.00294	0.83222	0.02695	0.00492	0.0036	2.44409
wm-lh-superiortemporal	7265.53	1292.38	7256.97	1143.84	-8.56667	-0.11798	466.496	6.42445	85.1701	1.17294	-1045	619	-14.3915	8.5247	42.5	363.433	5.00511	284.703	3.92085	51.9794	0.71585	1	1045	0.01377	14.3915	0.92927	0.88426	0.02272	0.00415	0.79253	0.03591	0.00656	0.92057	0.0359422
wm-lh-supramarginal	8224.53	1206.65	8284.97	1221.32	60.4333	0.7321	555.219	6.72605	101.369	1.228	-989	959	-11.981	11.6175	82.5	458.967	5.56003	306.809	3.71676	56.0155	0.67858	24	989	0.29074	11.981	0.89755	0.89855	0.03384	0.00618	0.81578	0.05448	0.00995	0.55568	0.25517
wm-lh-temporalpole	479.5	126.555	590.867	91.3152	111.367	20.8091	105.528	19.7181	19.2667	3.60002	-136	342	-25.4119	63.9033	109.5	130.3	24.3468	80.0177	14.9515	14.6092	2.72975	1	342	0.18685	63.9033	0.23717	0.69521	0.133	0.02428	0.53282	0.13255	0.0242	0	5.53452
wm-lh-transversetemporal	719.9	181.477	733.333	149.523	13.4333	1.84875	105.371	14.5016	19.2381	2.64762	-223	333	-30.6902	45.8288	23	78.7	10.831	69.8748	9.61647	12.7573	1.75572	2	333	0.27525	45.8288	0.80228	0.80272	0.06608	0.01206	0.67045	0.08622	0.01574	0.49057	0.3093
wm-rh-bankssts	2888.63	477.489	2825.97	520.899	-62.6667	-2.19321	349.475	12.2309	63.805	2.23305	-648	852	-22.6788	29.8184	-73.5	259.733	9.09017	237.502	8.31212	43.3618	1.51758	6	852	0.20999	29.8184	0.75566	0.82495	0.07224	0.01319	0.70206	0.10083	0.01841	0.33415	0.476065
wm-rh-caudalanteriorcingulate	2658.27	550.981	3059.47	579.363	401.2	14.0335	251.905	8.81135	45.9913	1.60873	-246	1153	-8.60481	40.3307	398	417.6	14.6072	222.631	7.78739	40.6467	1.42178	13	1153	0.45473	40.3307	0.69067	0.81967	0.05448	0.00995	0.69444	0.0746	0.01362	0	30
wm-rh-caudalmiddlefrontal	6004.33	1148.37	6055.5	1089.12	51.1667	0.84855	575.14	9.53811	105.006	1.74141	-1102	1368	-18.2755	22.6869	146	464.1	7.69662	332.684	5.51722	60.7394	1.0073	36	1368	0.59702	22.6869	0.87109	0.88982	0.03118	0.00569	0.80152	0.0505	0.00922	0.62973	0.200848
wm-rh-cuneus	2226.63	331.198	2409.83	345.101	183.2	7.90257	265.367	11.447	48.4492	2.08992	-335	952	-14.4507	41.0658	164.5	235.733	10.1687	218.296	9.41646	39.8551	1.7192	6	952	0.25882	41.0658	0.58414	0.84129	0.05023	0.00917	0.72605	0.07152	0.01306	0.00072	3.14143
wm-rh-entorhinal	634.233	171.222	700.867	167.449	66.6333	9.98177	134.627	20.1673	24.5794	3.68203	-169	368	-25.3165	55.127	85.5	124.833	18.7002	81.2205	12.1669	14.8288	2.22137	12	368	1.79762	55.127	0.62951	0.73258	0.11181	0.02041	0.57801	0.12711	0.02321	0.01115	1.95257
wm-rh-frontalpole	199.833	61.0196	273.067	68.1388	73.2333	30.972	62.7896	26.5551	11.4637	4.84828	-66	220	-27.9129	93.0429	60	81.2333	34.3554	51.6157	21.8295	9.4237	3.98549	10	220	4.22922	93.0429	0.16462	0.70501	0.12241	0.02235	0.54442	0.13742	0.02509	0	6.27048
wm-rh-fusiform	6091.9	991.839	6447.47	1108.86	355.567	5.67121	321.029	5.12034	58.6116	0.93484	-345	914	-5.50267	14.5781	344	406.233	6.47933	251.259	4.00752	45.8734	0.73167	27	914	0.43064	14.5781	0.90063	0.86356	0.03119	0.00569	0.75989	0.04752	0.00868	0	5.8823
wm-rh-inferiorparietal	10900.2	1489.93	11094.1	1500.89	193.9	1.76319	659.095	5.99335	120.334	1.09423	-828	2222	-7.52925	20.2053	131.5	499.167	4.53907	464.264	4.22169	84.7626	0.77077	34	2222	0.30917	20.2053	0.89797	0.90286	0.02782	0.00508	0.82292	0.04492	0.0082	0.11794	0.928357
wm-rh-inferiortemporal	5212.7	1190.07	5452.53	1024.52	239.833	4.49748	459.905	8.62438	83.9668	1.57459	-686	968	-12.8642	18.1524	258	443.5	8.31674	259.887	4.87355	47.4487	0.88978	118	968	2.2128	18.1524	0.89483	0.84079	0.03824	0.00698	0.72532	0.05665	0.01034	0.00784	2.10543
wm-rh-insula	8557	1027.51	9284.2	1388.84	727.2	8.15192	643.022	7.20828	117.399	1.31605	-381	2275	-4.27101	25.5028	648	752.6	8.43665	612.041	6.86098	111.743	1.25264	4	2275	0.04484	25.5028	0.71361	0.85921	0.02791	0.0051	0.75316	0.04246	0.00775	0	6.0206
wm-rh-isthmuscingulate	3013.63	436.131	3514.67	539.538	501.033	15.3496	246.091	7.53922	44.9299	1.37647	15	1121	0.45954	34.3428	456	501.033	15.3496	246.091	7.53922	44.9299	1.37647	15	1121	0.45954	34.3428	0.48899	0.79607	0.04223	0.00771	0.66123	0.0559	0.01021	0	30
wm-rh-lateraloccipital	8413.87	1234.06	8567.53	1286.42	153.667	1.80982	604.865	7.12385	110.433	1.30063	-1395	1620	-16.4297	19.0797	82	474.333	5.5865	396.912	4.67466	72.4658	0.85347	11	1620	0.12955	19.0797	0.88149	0.8766	0.03883	0.00709	0.78031	0.05905	0.01078	0.17466	0.757813
wm-rh-lateralorbitofrontal	6524.07	898.301	6951.83	1138.22	427.767	6.34862	563.024	8.35601	102.794	1.52559	-518	1761	-7.6878	26.1355	327	554.833	8.23445	433.399	6.43221	79.1275	1.17436	60	1761	0.89048	26.1355	0.77639	0.90029	0.02702	0.00493	0.81867	0.04367	0.00797	0.00026	3.58894
wm-rh-lingual	5318.17	843.038	5510.97	833.538	192.8	3.56077	395.745	7.3089	72.2528	1.33442	-577	1046	-10.6564	19.3183	169	341	6.29783	273.454	5.05034	49.9257	0.92206	23	1046	0.42478	19.3183	0.86734	0.854	0.03383	0.00618	0.74521	0.05067	0.00925	0.01235	1.90847
wm-rh-medialorbitofrontal	3209.27	530.54	3491.93	569.171	282.667	8.4363	260.82	7.78428	47.619	1.42121	-294	792	-8.77455	23.6376	257.5	310.867	9.27794	225.194	6.721	41.1146	1.22708	10	792	0.29845	23.6376	0.77391	0.8763	0.02596	0.00474	0.77984	0.04105	0.00749	0	5.71957
wm-rh-middletemporal	5371.93	929.68	5669.03	928.831	297.1	5.38178	504.505	9.13878	92.1096	1.66851	-611	1402	-11.0679	25.3963	240	452.833	8.20278	365.662	6.62372	66.7604	1.20932	65	1402	1.17743	25.3963	0.8108	0.84551	0.03696	0.00675	0.73236	0.05481	0.01001	0.00311	2.5074
wm-rh-paracentral	5210.03	849.333	5095.13	994.129	-114.9	-2.22995	430.131	8.34787	78.5308	1.5241	-851	715	-16.516	13.8765	-170.5	378.367	7.34324	224.882	4.36444	41.0576	0.79683	17	851	0.32993	16.516	0.8879	0.90044	0.03179	0.0058	0.81891	0.05165	0.00943	0.15419	0.811944
wm-rh-parahippocampal	1699.7	332.078	1477.13	288.046	-222.567	-14.0119	220.083	13.8555	40.1815	2.52966	-718	228	-45.2022	14.3539	-167	252.3	15.8837	183.93	11.5795	33.5809	2.11411	15	718	0.94434	45.2022	0.55638	0.8255	0.04898	0.00894	0.70285	0.06974	0.01273	1e-05	5.247
wm-rh-parsopercularis	3442.53	765.773	3326.43	672.929	-116.1	-3.43036	312.689	9.23891	57.089	1.68679	-981	271	-28.9852	8.00713	-32	258.433	7.63583	206.465	6.10034	37.6952	1.11376	26	981	0.76821	28.9852	0.89659	0.8707	0.0329	0.00601	0.77101	0.05089	0.00929	0.05123	1.29052
wm-rh-parsorbitalis	1162.8	282.762	1188.77	261.54	25.9667	2.20846	120.183	10.2215	21.9423	1.86619	-289	238	-24.5794	20.2418	46	98.6333	8.38873	71.2565	6.06034	13.0096	1.10646	2	289	0.1701	24.5794	0.90141	0.8361	0.05866	0.01071	0.71835	0.08103	0.01479	0.24626	0.608607
wm-rh-parstriangularis	3132.47	685.044	3317.2	636.548	184.733	5.72846	234.576	7.27404	42.8274	1.32805	-257	606	-7.9694	18.7917	196	252.333	7.82469	156.401	4.84989	28.5547	0.88546	11	606	0.3411	18.7917	0.90196	0.87663	0.02579	0.00471	0.78036	0.04094	0.00747	0.00017	3.77003
wm-rh-pericalcarine	3409.13	754.539	3390.6	688.895	-18.5333	-0.54512	299.19	8.80006	54.6244	1.60666	-863	544	-25.3834	16.0006	-5	222.867	6.55516	196.183	5.77032	35.818	1.05351	7	863	0.20589	25.3834	0.91667	0.85455	0.05263	0.00961	0.74604	0.07696	0.01405	0.73684	0.132629
wm-rh-postcentral	6902.5	1090.28	6838.13	1022.45	-64.3667	-0.93688	310.152	4.51437	56.6257	0.82421	-715	579	-10.4071	8.42756	-32	237.367	3.45496	205.412	2.98985	37.503	0.54587	3	715	0.04367	10.4071	0.95653	0.88513	0.03139	0.00573	0.79393	0.04775	0.00872	0.26497	0.576808
wm-rh-posteriorcingulate	4215.87	631.948	4300.6	583.15	84.7333	1.98987	308.911	7.25444	56.3992	1.32447	-487	742	-11.4367	17.4251	36	235.467	5.52968	213.3	5.00912	38.9431	0.91454	6	742	0.1409	17.4251	0.8659	0.85928	0.03772	0.00689	0.75327	0.05576	0.01018	0.14381	0.842214
wm-rh-precentral	13346.6	1866.04	13373.2	1913.97	26.5667	0.19885	393.529	2.94561	71.8483	0.53779	-844	777	-6.31742	5.81592	-9	298.1	2.23131	252.325	1.88867	46.068	0.34482	9	844	0.06737	6.31742	0.97894	0.92783	0.01642	0.003	0.86537	0.02797	0.00511	0.71425	0.146153
wm-rh-precuneus	9976.07	1419.5	10138.9	1593.94	162.8	1.6187	544.242	5.41132	99.3645	0.98797	-1149	1714	-11.4244	17.0421	278	434	4.3152	358.839	3.56789	65.5148	0.6514	4	1714	0.03977	17.0421	0.93146	0.91922	0.02506	0.00458	0.85052	0.0419	0.00765	0.11214	0.950232
wm-rh-rostralanteriorcingulate	1578.87	259.658	2226.7	336.805	647.833	34.0466	238.863	12.5533	43.6101	2.29191	188	1171	9.88026	61.5414	609.5	647.833	34.0466	238.863	12.5533	43.6101	2.29191	188	1171	9.88026	61.5414	0	0.74675	0.05071	0.00926	0.59585	0.06465	0.0118	0	30
wm-rh-rostralmiddlefrontal	12221.3	2758.5	12876	2648.56	654.7	5.21731	777.945	6.19945	142.033	1.13186	-666	2104	-5.30736	16.7668	700.5	809.7	6.4525	608.597	4.84991	111.114	0.88547	39	2104	0.31079	16.7668	0.93164	0.9189	0.02025	0.0037	0.84997	0.0345	0.0063	7e-05	4.12504
wm-rh-superiorfrontal	18100.8	2619.22	17899	2413.31	-201.733	-1.12075	759.833	4.22132	138.726	0.7707	-1847	1979	-10.2612	10.9945	-245.5	588.267	3.26817	511.327	2.84072	93.3551	0.51864	10	1979	0.05556	10.9945	0.95283	0.92587	0.00954	0.00174	0.86197	0.01655	0.00302	0.15663	0.805117
wm-rh-superiorparietal	11134.5	1776	11260.7	1778.06	126.2	1.12703	851.844	7.6074	155.525	1.38891	-1692	2310	-15.1104	20.6295	177	618.333	5.52203	588.721	5.25758	107.485	0.9599	66	2310	0.58941	20.6295	0.88634	0.90061	0.03219	0.00588	0.81919	0.05127	0.00936	0.42372	0.37292
wm-rh-superiortemporal	6321.1	982.829	6374.03	999.547	52.9333	0.83392	437.902	6.89874	79.9496	1.25953	-751	1065	-11.8313	16.7781	69	335.267	5.28181	279.959	4.41049	51.1132	0.80524	14	1065	0.22056	16.7781	0.90416	0.89309	0.02105	0.00384	0.80684	0.034	0.00621	0.51314	0.289761
wm-rh-supramarginal	8454.47	1343.48	8561.27	1497.13	106.8	1.25531	414.089	4.86713	75.602	0.88861	-660	1349	-7.75753	15.8559	4.5	298.467	3.50813	301.853	3.54793	55.1106	0.64776	0	1349	0	15.8559	0.95625	0.91244	0.02163	0.00395	0.83898	0.0358	0.00654	0.1684	0.773661
wm-rh-temporalpole	554.367	192.241	584.4	136.241	30.0333	5.27471	150.791	26.4832	27.5305	4.83515	-351	369	-61.6456	64.807	48	114.5	20.1095	100.542	17.658	18.3563	3.2239	1	369	0.17563	64.807	0.58838	0.70105	0.11115	0.02029	0.53971	0.12105	0.0221	0.28429	0.546234
wm-rh-transversetemporal	495.033	136.589	517.6	106.778	22.5667	4.45703	89.0942	17.5965	16.2663	3.21267	-299	225	-59.054	44.4386	36.5	66.1667	13.0682	62.7343	12.3903	11.4537	2.26215	2	299	0.39501	59.054	0.72888	0.77705	0.06835	0.01248	0.63539	0.08559	0.01563	0.17591	0.754704
Brain Mask Volume	1582745	148440	1.52126e+06	165789	-61484.6	-3.96163	58786	3.78775	10732.8	0.69155	-180978	73307	-11.6609	4.72338	-73310.5	74802.7	4.81976	39725.4	2.55962	7252.84	0.46732	4615	180978	0.29736	11.6609	0.86133	0.97145	0.01176	0.00215	0.94448	0.02215	0.00404	0	5.47653
Brain Segmentation Volume	1.17327e+06	139179	1.18443e+06	145753	11157.1	0.94644	19046.2	1.61566	3477.35	0.29498	-24728	55426	-2.09764	4.7017	6498	15861.9	1.34554	15207.2	1.29	2776.43	0.23552	682	55426	0.05785	4.7017	0.98832	0.97309	0.0066	0.0012	0.94759	0.01241	0.00227	0.00325	2.48849
Brain Segmentation Volume Without Ventricles	1.1532e+06	139865	1.16396e+06	146513	10767.8	0.9294	19029.8	1.64251	3474.35	0.29988	-25194	54748	-2.17456	4.72544	6123	15587.1	1.34537	15190.1	1.3111	2773.33	0.23937	266	54748	0.02296	4.72544	0.98866	0.97209	0.0071	0.0013	0.9457	0.0133	0.00243	0.00429	2.3679
Ventricles	17257	10334.3	17533.9	10423.6	276.833	1.59141	312.405	1.7959	57.037	0.32788	-343	1416	-1.97178	8.14006	213	306.233	1.76042	282.601	1.62457	51.5957	0.2966	4	1416	0.02299	8.14006	0.99921	0.9587	0.02037	0.00372	0.92067	0.03643	0.00665	4e-05	4.41922
Left Medial-inferior Temporal Gyrus	29348.7	5035.13	31172.7	4870.91	1823.97	6.02751	1695.62	5.60336	309.576	1.02303	-2152	4948	-7.11154	16.3513	1737.5	2061.1	6.81115	1386.39	4.58148	253.118	0.83646	9	4948	0.02974	16.3513	0.87955	0.90085	0.03542	0.00647	0.81959	0.05412	0.00988	0	5.66842
Right Medial-inferior Temporal Gyrus	30575.3	5788.5	31988.8	4964.16	1413.5	4.51857	1797.68	5.7467	328.21	1.0492	-2180	5024	-6.96886	16.0603	1478	1896.43	6.06238	1256.21	4.01576	229.352	0.73317	0	5024	0	16.0603	0.91333	0.90607	0.0282	0.00515	0.82827	0.04528	0.00827	0.00017	3.76187
Left Superior Temporal Gyrus	19265.8	2840.7	19406.5	2490	140.733	0.72783	1008.71	5.2167	184.164	0.95244	-1996	2620	-10.3226	13.5498	261.5	794.267	4.10768	620.781	3.21047	113.339	0.58615	135	2620	0.69817	13.5498	0.92965	0.9054	0.02053	0.00375	0.82715	0.03389	0.00619	0.45094	0.345885
Right Superior Temporal Gyrus	17812.5	2519.91	18228.4	2359.52	415.9	2.30793	925.512	5.13589	168.975	0.93768	-1182	2362	-6.5592	13.1073	627	829.233	4.60162	569.361	3.15952	103.951	0.57685	51	2362	0.28301	13.1073	0.91651	0.9189	0.01486	0.00271	0.84997	0.02538	0.00463	0.02003	1.69827
Left Temporal Lobe	80636.6	10991.5	83428	10381	2791.4	3.4028	2202.01	2.68432	402.03	0.49009	-986	7471	-1.20197	9.10738	2752.5	2954.2	3.60126	1970.08	2.40158	359.685	0.43847	117	7471	0.14263	9.10738	0.9463	0.93118	0.02152	0.00393	0.87122	0.03626	0.00662	0	6.92369
Right Temporal Lobe	79033.1	11469.7	81673.5	10521.5	2640.37	3.28595	2425.07	3.01801	442.756	0.55101	-618	8463	-0.7691	10.5322	1837	2740.23	3.41023	2307.62	2.87184	421.312	0.52432	127	8463	0.15805	10.5322	0.94848	0.93286	0.01753	0.0032	0.87418	0.03008	0.00549	0	5.7476

## Sheet: Between-version HP
v4.3.1 vs. v4.5.0
Struct	Mean1	sd1	Mean2	sd2	Mean diff	Mean diff %	sd Diff	sd Diff %	se Diff	se Diff %	min Diff	max Diff	min Diff %	max Diff %	median	Mean AbsDiff	Mean AbsDiff %	sd AbsDiff	sd AbsDiff %	se AbsDiff	se AbsDiff %	min AbsDiff	max AbsDiff	min AbsDiff %	max AbsDiff %	ICC	SI	sd SI	se SI	OR	sd OR	se OR	p	-log10(p)
3rd-Ventricle	983.034	454.326	977.069	448.799	-5.96552	-0.60869	23.847	2.43323	4.42827	0.45184	-103	35	-10.5097	3.57124	-5	13.3448	1.36165	20.5205	2.09382	3.81056	0.38881	0	103	0	10.5097	0.99857	0.98243	0.01469	0.00273	0.96546	0.02813	0.00522	0.18874	0.724147
4th-Ventricle	1864.52	799.353	1858.93	801.742	-5.58621	-0.30006	41.6023	2.23461	7.72535	0.41496	-166	68	-8.91647	3.65253	0	22.7586	1.22245	35.0231	1.88122	6.50363	0.34933	0	166	0	8.91647	0.99867	0.97776	0.01887	0.0035	0.95648	0.03565	0.00662	0.47562	0.322746
5th-Ventricle	7.86207	8.69205	7.24138	7.72591	-0.62069	-8.21918	2.79558	37.0191	0.51913	6.87428	-9	7	-119.178	92.6941	0	1.31034	17.3516	2.53692	33.5939	0.47109	6.23823	0	9	0	119.178	0.94138	0.90868	0.46297	0.08597	0.83264	0.45923	0.08528	0.24186	0.616429
Brain-Stem	18086.7	2261.76	18086.6	2268.58	-0.13793	-0.00076	84.1176	0.46508	15.6202	0.08636	-158	315	-0.87357	1.74162	0	49.931	0.27607	67.0346	0.37063	12.448	0.06882	0	315	0	1.74162	0.99933	0.98816	0.00972	0.0018	0.9766	0.01884	0.0035	0.99302	0.0030444
CC_Anterior	950.414	157.426	959.379	163.976	8.96552	0.9389	35.5673	3.72473	6.60469	0.69167	-22	185	-2.30391	19.3738	0	12.7586	1.33613	34.3466	3.59689	6.37801	0.66793	0	185	0	19.3738	0.97482	0.95696	0.08611	0.01599	0.91746	0.13808	0.02564	0.18548	0.731704
CC_Central	477.448	116.851	482.759	123.547	5.31034	1.10608	20.4888	4.26759	3.80468	0.79247	-22	100	-4.58235	20.8288	0	7.93103	1.65194	19.5922	4.08082	3.63817	0.75779	0	100	0	20.8288	0.98501	0.96258	0.07824	0.01453	0.92786	0.12831	0.02383	0.17376	0.760041
CC_Mid_Anterior	507.069	130.917	502.276	126.55	-4.7931	-0.94975	30.01	5.94643	5.57271	1.10422	-156	31	-30.9111	6.1426	0	8.93103	1.76967	29.0135	5.74897	5.38766	1.06756	0	156	0	30.9111	0.97308	0.95385	0.08699	0.01615	0.91176	0.13747	0.02553	0.39704	0.401166
CC_Mid_Posterior	465.379	99.5298	465.379	98.3178	0	0	12.145	2.60969	2.25526	0.48461	-31	38	-6.66123	8.16538	0	6.34483	1.36337	10.2862	2.21028	1.91009	0.41044	0	38	0	8.16538	0.99272	0.96191	0.07741	0.01438	0.92662	0.12739	0.02366	1	0
CC_Posterior	912.552	157.748	906.966	163.138	-5.58621	-0.61403	25.1133	2.76044	4.66343	0.5126	-130	13	-14.2895	1.42895	0	9.58621	1.05371	23.829	2.61927	4.42494	0.48639	0	130	0	14.2895	0.98757	0.96081	0.08087	0.01502	0.92457	0.13083	0.02429	0.24101	0.617971
CSF	1210.97	278.703	1211.97	276.956	1	0.08254	25.6404	2.11648	4.7613	0.39302	-60	70	-4.95268	5.77813	0	16.0345	1.32356	19.8035	1.63467	3.67741	0.30355	0	70	0	5.77813	0.99588	0.97092	0.02053	0.00381	0.94349	0.0387	0.00719	0.83517	0.0782251
Left-Accumbens-area	576.207	115.038	587.034	130.224	10.8276	1.86162	41.6748	7.16529	7.73882	1.33056	-66	181	-11.3476	31.1199	0	22.6897	3.90111	36.4006	6.25849	6.75943	1.16217	0	181	0	31.1199	0.94063	0.94196	0.05242	0.00973	0.89028	0.08895	0.01652	0.17276	0.762569
Left-Amygdala	1763.59	326.062	1772.62	342.56	9.03448	0.51097	55.8835	3.16065	10.3773	0.58692	-90	142	-5.0902	8.0312	0	38.069	2.1531	41.3098	2.33639	7.67103	0.43386	0	142	0	8.0312	0.98615	0.95468	0.04414	0.0082	0.91328	0.07662	0.01423	0.39138	0.407407
Left-Caudate	3972.62	573.496	3990.1	576.556	17.4828	0.43912	76.9901	1.93376	14.2967	0.35909	-62	395	-1.55726	9.92123	0	30.1034	0.75611	72.8385	1.82949	13.5258	0.33973	0	395	0	9.92123	0.99088	0.98142	0.01733	0.00322	0.96351	0.03251	0.00604	0.23158	0.635303
Left-Cerebellum-Cortex	47553.6	6609.24	47617.7	6644.31	64.1034	0.13471	308.002	0.64726	57.1946	0.12019	-349	1101	-0.73342	2.31372	0	157.483	0.33095	270.988	0.56948	50.3213	0.10575	0	1101	0	2.31372	0.99891	0.97888	0.01945	0.00361	0.95863	0.03657	0.00679	0.2719	0.565599
Left-Cerebellum-White-Matter	16179.3	2357.94	16041.1	2369.29	-138.172	-0.85767	455.43	2.82696	84.5713	0.52495	-1959	392	-12.16	2.43324	3	195.828	1.21555	432.981	2.68761	80.4025	0.49908	0	1959	0	12.16	0.98038	0.98022	0.01965	0.00365	0.9612	0.03702	0.00687	0.1135	0.945016
Left-Cerebral-Cortex	260671	33655	261291	34206.6	620	0.23756	1870.33	0.71665	347.312	0.13308	-483	9696	-0.18507	3.71521	25	769.931	0.29501	1811.72	0.69419	336.427	0.12891	0	9696	0	3.71521	0.99837	0.98516	0.01297	0.00241	0.97076	0.02481	0.00461	0.08508	1.07018
Left-Cerebral-White-Matter	207827	30086.9	207405	30039.3	-422	-0.20326	1636.62	0.78829	303.912	0.14638	-8271	2520	-3.98379	1.21378	-160	625.586	0.30132	1567.68	0.75509	291.111	0.14022	0	8271	0	3.98379	0.99847	0.99129	0.00766	0.00142	0.98273	0.01487	0.00276	0.17591	0.7547
Left-Hippocampus	4087.41	526.822	4094.97	538.153	7.55172	0.18459	73.0868	1.78644	13.5719	0.33173	-159	206	-3.8864	5.03521	0	44.1724	1.0797	58.1366	1.42102	10.7957	0.26388	0	206	0	5.03521	0.9908	0.96567	0.0268	0.00498	0.93363	0.04978	0.00924	0.58234	0.234823
Left-Inf-Lat-Vent	385.621	313.148	392.345	329.652	6.72414	1.72865	38.4855	9.89389	7.14658	1.83725	-73	157	-18.7669	40.3617	0	20.7241	5.32778	32.911	8.46079	6.11142	1.57113	0	157	0	40.3617	0.99286	0.92106	0.0758	0.01408	0.85367	0.12208	0.02267	0.35481	0.450007
Left-Lateral-Ventricle	8890.21	6583.74	8877.41	6543.81	-12.7931	-0.144	71.415	0.80388	13.2614	0.14928	-262	113	-2.94918	1.27198	0	41.8276	0.47083	58.8012	0.66189	10.9191	0.12291	0	262	0	2.94918	0.99994	0.98768	0.01492	0.00277	0.97566	0.0284	0.00527	0.34296	0.464756
Left-Pallidum	1615.17	381.981	1747.62	254.271	132.448	7.87728	190.61	11.3364	35.3954	2.10512	-18	669	-1.07054	39.7884	82	136.586	8.12338	187.561	11.1551	34.8292	2.07145	0	669	0	39.7884	0.7594	0.88871	0.13451	0.02498	0.79971	0.18474	0.03431	0.00084	3.078
Left-Putamen	6154.48	775.033	6209.24	771.675	54.7586	0.88579	89.8688	1.45375	16.6882	0.26995	-35	379	-0.56617	6.13084	18	59.8621	0.96835	86.4323	1.39816	16.0501	0.25963	0	379	0	6.13084	0.99098	0.97425	0.01788	0.00332	0.94979	0.03381	0.00628	0.00277	2.55756
Left-Thalamus-Proper	7232.45	929.599	7175.38	940.648	-57.069	-0.79219	100.426	1.39405	18.6486	0.25887	-360	170	-4.99728	2.35983	-39	75.4138	1.04684	86.9953	1.20761	16.1546	0.22425	0	360	0	4.99728	0.99258	0.98084	0.01366	0.00254	0.9624	0.02628	0.00488	0.00484	2.31541
Left-VentralDC	3891	415.462	3902.59	423.749	11.5862	0.29733	60.9447	1.56397	11.3171	0.29042	-108	165	-2.77151	4.23425	0	41.1724	1.05657	45.7993	1.17531	8.50472	0.21825	0	165	0	4.23425	0.98944	0.96529	0.02467	0.00458	0.9329	0.04576	0.0085	0.31471	0.502097
Left-choroid-plexus	1641.14	324.717	1615.69	335.218	-25.4483	-1.56276	41.5646	2.55246	7.71835	0.47398	-124	35	-7.61477	2.14933	-11	31.7241	1.94816	36.8238	2.26133	6.83801	0.41992	0	124	0	7.61477	0.98938	0.93342	0.05299	0.00984	0.87516	0.09118	0.01693	0.00266	2.57512
Left-vessel	85.6552	50.4064	88.6552	54.0227	3	3.44214	11.361	13.0353	2.10968	2.4206	-22	31	-25.2423	35.5687	3	8.10345	9.29773	8.38938	9.6258	1.55787	1.78747	0	31	0	35.5687	0.97553	0.89773	0.09573	0.01778	0.81443	0.1483	0.02754	0.16607	0.779719
Optic-Chiasm	202.724	88.5216	190.655	96.6704	-12.069	-6.13604	35.5035	18.0505	6.59283	3.35189	-141	33	-71.6865	16.7777	-2	17.7241	9.01122	32.9544	16.7545	6.11948	3.11124	0	141	0	71.6865	0.92092	0.91269	0.17459	0.03242	0.83941	0.20276	0.03765	0.07782	1.10891
Right-Accumbens-area	681.897	117.354	693.448	117.555	11.5517	1.67983	17.365	2.52518	3.22459	0.46891	-22	45	-3.1992	6.54381	8	14.5862	2.1211	14.812	2.15393	2.75051	0.39997	0	45	0	6.54381	0.98465	0.9552	0.03444	0.0064	0.91423	0.06295	0.01169	0.00127	2.89565
Right-Amygdala	1798.66	354.123	1810.9	354.458	12.2414	0.67828	48.8091	2.70444	9.06363	0.5022	-93	179	-5.15299	9.91813	1	32.0345	1.77498	38.4015	2.12777	7.13098	0.39512	0	179	0	9.91813	0.99024	0.96157	0.02928	0.00544	0.92598	0.0538	0.00999	0.18764	0.726679
Right-Caudate	4026.76	578.17	4033.52	582.401	6.75862	0.1677	51.5535	1.2792	9.57324	0.23754	-182	147	-4.51597	3.64752	0	28.1379	0.69819	43.4172	1.07731	8.06237	0.20005	0	182	0	4.51597	0.99612	0.98346	0.01464	0.00272	0.96746	0.02789	0.00518	0.48603	0.313339
Right-Cerebellum-Cortex	47596.9	7218.79	47575	7166.38	-21.8621	-0.04594	327.665	0.68858	60.8459	0.12787	-876	715	-1.84088	1.50254	0	207.586	0.43623	251.453	0.52842	46.6936	0.09812	0	876	0	1.84088	0.99899	0.98089	0.01792	0.00333	0.96249	0.03375	0.00627	0.72206	0.141424
Right-Cerebellum-White-Matter	16142.3	2675.75	16107	2647.02	-35.3103	-0.21898	218.335	1.35405	40.5438	0.25144	-1134	114	-7.03272	0.70699	1	73.7241	0.45721	208.164	1.29097	38.6551	0.23973	0	1134	0	7.03272	0.99666	0.98329	0.01407	0.00261	0.96714	0.02693	0.005	0.39121	0.407594
Right-Cerebral-Cortex	259658	34825.4	259900	34946.7	241.724	0.09305	582.7	0.22431	108.205	0.04165	-385	2308	-0.1482	0.88845	0	360.828	0.1389	514.986	0.19824	95.6305	0.03681	0	2308	0	0.88845	0.99984	0.98658	0.01095	0.00203	0.97352	0.02116	0.00393	0.03365	1.47299
Right-Cerebral-White-Matter	210648	30741.6	210503	30734.5	-145.655	-0.06917	502.966	0.23885	93.3984	0.04435	-1925	824	-0.91416	0.39131	-19	286	0.13582	436.154	0.20712	80.9918	0.03846	0	1925	0	0.91416	0.99986	0.99228	0.00578	0.00107	0.98468	0.01135	0.00211	0.13011	0.885691
Right-Hippocampus	4168.41	498.994	4177.1	500.406	8.68966	0.20825	63.1371	1.51308	11.7243	0.28097	-126	279	-3.01959	6.68622	0	33.5862	0.80489	53.8162	1.2897	9.99341	0.23949	0	279	0	6.68622	0.99214	0.97261	0.0196	0.00364	0.94667	0.03704	0.00688	0.46476	0.332769
Right-Inf-Lat-Vent	326.483	265.976	323.207	267.604	-3.27586	-1.00844	15.4802	4.7654	2.87459	0.88491	-53	14	-16.3155	4.30975	0	9.89655	3.04655	12.2193	3.76157	2.26906	0.69851	0	53	0	16.3155	0.9983	0.95366	0.0423	0.00786	0.91143	0.07401	0.01374	0.26411	0.578211
Right-Lateral-Ventricle	7803.1	4334.82	7815.86	4342.24	12.7586	0.16337	43.3603	0.55523	8.05181	0.1031	-40	143	-0.5122	1.83111	0	27.0345	0.34618	35.9409	0.46022	6.67406	0.08546	0	143	0	1.83111	0.99995	0.98791	0.0165	0.00306	0.9761	0.03086	0.00573	0.1243	0.905543
Right-Pallidum	1419.97	318.911	1541.41	191.627	121.448	8.20214	216.566	14.626	40.2153	2.71598	-74	910	-4.99767	61.4579	29	129.31	8.73312	211.799	14.3041	39.3301	2.6562	0	910	0	61.4579	0.58595	0.87911	0.16557	0.03075	0.7843	0.22057	0.04096	0.00535	2.27193
Right-Putamen	5827.93	734.48	5868.21	711.778	40.2759	0.6887	95.9657	1.64098	17.8204	0.30472	-91	305	-1.55607	5.2154	4	66.8276	1.14273	79.1459	1.35337	14.697	0.25131	0	305	0	5.2154	0.98996	0.97613	0.01673	0.00311	0.95338	0.03197	0.00594	0.03178	1.4978
Right-Thalamus-Proper	7363.34	985.447	7338.1	973.507	-25.2414	-0.34339	83.3532	1.13395	15.4783	0.21057	-310	111	-4.21727	1.51006	-11	53.2414	0.7243	68.3503	0.92984	12.6923	0.17267	0	310	0	4.21727	0.99617	0.98477	0.01066	0.00198	0.96999	0.02068	0.00384	0.11414	0.942562
Right-VentralDC	3846.83	397.893	3845.66	426.248	-1.17241	-0.03048	69.4859	1.80659	12.9032	0.33548	-141	185	-3.66592	4.80989	0	48.7586	1.2677	48.656	1.26503	9.03519	0.23491	0	185	0	4.80989	0.98628	0.96896	0.02102	0.0039	0.93979	0.03962	0.00736	0.92825	0.0323376
Right-choroid-plexus	1802.55	406.389	1791.86	423.177	-10.6897	-0.59479	55.3212	3.07818	10.2729	0.5716	-140	88	-7.78987	4.89649	0	39.8621	2.218	39.1542	2.17861	7.27075	0.40456	0	140	0	7.78987	0.99108	0.93958	0.04954	0.0092	0.88605	0.0856	0.0159	0.30698	0.512893
Right-vessel	62.5862	45.2986	63.4138	46.0989	0.82759	1.31363	6.05374	9.60911	1.12415	1.78437	-13	13	-20.6349	20.6349	0	4.27586	6.78708	4.29199	6.81268	0.797	1.26508	0	13	0	20.6349	0.99136	0.91899	0.07853	0.01458	0.85013	0.12848	0.02386	0.46774	0.329994
ctx-lh-bankssts	2497.28	507.209	2499.17	524.004	1.89655	0.07592	157.787	6.31596	29.3003	1.17284	-387	286	-15.491	11.4481	0	113.621	4.54806	107.376	4.29811	19.9393	0.79814	0	387	0	15.491	0.95476	0.91088	0.06978	0.01296	0.83635	0.10709	0.01989	0.94885	0.0228005
ctx-lh-caudalanteriorcingulate	2033.76	638.051	2031.07	655.987	-2.68966	-0.13234	106.139	5.2223	19.7095	0.96976	-203	199	-9.98812	9.79131	0	76.8276	3.78012	71.8307	3.53426	13.3386	0.65629	0	203	0	9.98812	0.987	0.91422	0.05176	0.00961	0.84199	0.08944	0.01661	0.89243	0.0494271
ctx-lh-caudalmiddlefrontal	7229.34	1132.02	7131.41	1153.29	-97.931	-1.36387	235.619	3.28143	43.7534	0.60935	-857	493	-11.9353	6.86593	-9	163.034	2.27056	194.73	2.71198	36.1605	0.5036	0	857	0	11.9353	0.97584	0.94386	0.05594	0.01039	0.89368	0.08768	0.01628	0.03334	1.47706
ctx-lh-cuneus	2898.07	404.041	2887.07	426.253	-11	-0.38028	179.549	6.20726	33.3415	1.15266	-387	353	-13.3791	12.2037	0	130.034	4.49547	121.862	4.21294	22.6292	0.78232	0	387	0	13.3791	0.90928	0.87688	0.07211	0.01339	0.78076	0.11654	0.02164	0.74392	0.128477
ctx-lh-entorhinal	1771.31	506.523	1736.76	477.989	-34.5517	-1.96984	198.454	11.3141	36.8519	2.10098	-797	204	-45.4381	11.6303	0	125.379	7.14805	156.009	8.89431	28.9702	1.65163	0	797	0	45.4381	0.91913	0.86423	0.08752	0.01625	0.76093	0.13681	0.02541	0.35648	0.44797
ctx-lh-frontalpole	675.655	178.795	700.966	197.005	25.3103	3.67717	78.5267	11.4086	14.582	2.11853	-110	230	-15.9812	33.4152	3	58.069	8.43645	57.7711	8.39317	10.7278	1.55857	0	230	0	33.4152	0.90711	0.88177	0.06543	0.01215	0.78854	0.10925	0.02029	0.09361	1.02869
ctx-lh-fusiform	8804.1	1679.14	8855.52	1696.64	51.4138	0.58228	578.918	6.5564	107.502	1.21749	-2103	1461	-23.817	16.5462	0	322.172	3.64869	479.981	5.43591	89.1302	1.00942	0	2103	0	23.817	0.9427	0.91395	0.05519	0.01025	0.84154	0.09376	0.01741	0.63618	0.196418
ctx-lh-inferiorparietal	11971.1	2641.92	12091.3	2566.11	120.241	0.99941	551.798	4.58639	102.466	0.85167	-631	1868	-5.2447	15.5263	0	299.621	2.49037	475.895	3.95551	88.3715	0.73452	0	1868	0	15.5263	0.97726	0.9465	0.03319	0.00616	0.89843	0.05962	0.01107	0.25049	0.601207
ctx-lh-inferiortemporal	9156.41	2161.23	9235.76	1986.66	79.3448	0.86281	581.862	6.32728	108.049	1.17495	-945	1332	-10.2761	14.4844	0	435.69	4.73777	385.33	4.19015	71.5539	0.77809	0	1332	0	14.4844	0.96133	0.91093	0.05793	0.01076	0.83642	0.09746	0.0181	0.46885	0.328969
ctx-lh-insula	6368.62	837.784	6384.1	793.605	15.4828	0.24281	166.686	2.61413	30.9528	0.48543	-425	514	-6.66524	8.06102	0	107.897	1.69213	126.393	1.98221	23.4705	0.36809	0	514	0	8.06102	0.97967	0.94089	0.03093	0.00574	0.88839	0.05684	0.01055	0.62084	0.207019
ctx-lh-isthmuscingulate	2455.41	390.256	2424.9	406.979	-30.5172	-1.25063	221.734	9.08686	41.1749	1.68739	-1050	360	-43.0301	14.7532	0	99.4828	4.0769	199.7	8.1839	37.0833	1.51971	0	1050	0	43.0301	0.84758	0.88876	0.06989	0.01298	0.7998	0.11109	0.02063	0.46477	0.332765
ctx-lh-lateraloccipital	11759.5	1702.89	11574.8	1633.52	-184.759	-1.58358	692.633	5.93661	128.619	1.1024	-2547	1119	-21.8305	9.59104	0	407.862	3.49582	585.493	5.01831	108.723	0.93188	0	2547	0	21.8305	0.91082	0.92539	0.04741	0.0088	0.86114	0.0819	0.01521	0.16194	0.790633
ctx-lh-lateralorbitofrontal	7986.66	1210.72	7899.17	1181.99	-87.4828	-1.10139	210.564	2.65097	39.1008	0.49227	-748	272	-9.4172	3.42444	-13	150.31	1.89238	169.893	2.13893	31.5484	0.39719	0	748	0	9.4172	0.98239	0.9402	0.03164	0.00588	0.88715	0.05778	0.01073	0.0334	1.47622
ctx-lh-lingual	6434	1005.34	6487.86	969.013	53.8621	0.83366	328.133	5.07873	60.9328	0.9431	-667	999	-10.3236	15.4622	0	202.759	3.13823	260.954	4.03895	48.4579	0.75001	0	999	0	15.4622	0.94518	0.90679	0.05512	0.01023	0.82947	0.09252	0.01718	0.38425	0.41539
ctx-lh-medialorbitofrontal	4367.79	671.928	4377.38	683.864	9.58621	0.21923	260.095	5.94831	48.2984	1.10457	-522	743	-11.938	16.9922	0	164	3.75064	199.72	4.56754	37.087	0.84817	0	743	0	16.9922	0.92875	0.91351	0.04491	0.00834	0.84079	0.07934	0.01473	0.8441	0.0736042
ctx-lh-middletemporal	9824.59	1762.59	9906.97	1656.96	82.3793	0.835	513.733	5.20723	95.3979	0.96696	-1505	1149	-15.2548	11.6463	0	347.966	3.527	381.506	3.86696	70.8438	0.71808	0	1505	0	15.2548	0.95529	0.91929	0.05506	0.01022	0.85064	0.09288	0.01725	0.39518	0.403203
ctx-lh-paracentral	4018.62	723.09	3967.83	687.357	-50.7931	-1.27198	420.668	10.5345	78.1161	1.95622	-1941	860	-48.6073	21.5365	0	175.966	4.4066	384.141	9.61981	71.3331	1.78635	0	1941	0	48.6073	0.82544	0.9258	0.0545	0.01012	0.86185	0.09024	0.01676	0.52085	0.28329
ctx-lh-parahippocampal	2307.31	351.377	2342.14	401.914	34.8276	1.49814	134.018	5.76491	24.8865	1.07052	-317	438	-13.636	18.8409	3	94.8276	4.07909	99.5174	4.28083	18.4799	0.79493	0	438	0	18.8409	0.93496	0.88346	0.0718	0.01333	0.79124	0.11546	0.02144	0.17266	0.762812
ctx-lh-parsopercularis	5141.21	701.462	5128.76	706.715	-12.4483	-0.24242	259.663	5.05675	48.2183	0.93902	-770	474	-14.9952	9.2308	0	169.276	3.29652	194.7	3.79163	36.1548	0.70409	0	770	0	14.9952	0.93411	0.93303	0.03663	0.0068	0.87447	0.06583	0.01223	0.79817	0.0979073
ctx-lh-parsorbitalis	2393.69	541.112	2473.97	561.926	80.2759	3.29834	200.51	8.23848	37.2338	1.52985	-191	704	-7.84772	28.9256	0	128.759	5.29038	172.36	7.08184	32.0064	1.31506	0	704	0	28.9256	0.92593	0.91862	0.05299	0.00984	0.84949	0.08937	0.0166	0.03982	1.39985
ctx-lh-parstriangularis	3633.34	691.564	3641.31	675.438	7.96552	0.21899	195.365	5.37112	36.2784	0.99739	-517	557	-14.2137	15.3134	0	125.414	3.44797	148.132	4.07254	27.5073	0.75625	0	557	0	15.3134	0.96047	0.92386	0.04374	0.00812	0.85849	0.07702	0.0143	0.8278	0.082073
ctx-lh-pericalcarine	2023.45	417.406	2040.48	427.11	17.0345	0.83833	266.154	13.0984	49.4236	2.4323	-811	923	-39.9121	45.424	0	139.724	6.8763	225.651	11.1051	41.9024	2.06216	0	923	0	45.424	0.80683	0.86302	0.09421	0.0175	0.75904	0.14255	0.02647	0.73292	0.13494
ctx-lh-postcentral	10557.1	1619.08	10476	1695.42	-81.1034	-0.7712	416.352	3.95902	77.3147	0.73517	-1989	681	-18.913	6.47551	0	193.448	1.83946	376.036	3.57566	69.8281	0.66398	0	1989	0	18.913	0.96835	0.94501	0.03592	0.00667	0.89575	0.06319	0.01173	0.30315	0.518348
ctx-lh-posteriorcingulate	3685.83	681.936	3705.72	677.384	19.8966	0.53836	110.831	2.99886	20.5808	0.55687	-283	259	-7.65739	7.008	19	77.4138	2.09466	80.5395	2.17923	14.9558	0.40467	0	283	0	7.65739	0.98673	0.91357	0.04401	0.00817	0.84089	0.07843	0.01456	0.34194	0.466046
ctx-lh-precentral	14496.1	2117.72	14452.1	2008.84	-44.0345	-0.30423	310.369	2.1443	57.634	0.39819	-1298	371	-8.96773	2.5632	0	179.966	1.24336	254.544	1.75862	47.2677	0.32657	0	1298	0	8.96773	0.98886	0.95769	0.02409	0.00447	0.91881	0.04479	0.00832	0.45124	0.345594
ctx-lh-precuneus	9987.31	1531.23	10047.8	1545.47	60.5172	0.60411	353.862	3.53241	65.7105	0.65595	-714	1123	-7.12748	11.2103	6	233.552	2.33142	269.29	2.68817	50.0059	0.49918	0	1123	0	11.2103	0.97368	0.93536	0.03377	0.00627	0.87858	0.06143	0.01141	0.36493	0.437786
ctx-lh-rostralanteriorcingulate	2288.48	617.399	2306.17	599.09	17.6897	0.77001	103.145	4.48979	19.1536	0.83373	-164	363	-7.13873	15.801	0	70.0345	3.04852	76.7009	3.3387	14.243	0.61998	0	363	0	15.801	0.9857	0.90957	0.05162	0.00959	0.83414	0.08946	0.01661	0.3636	0.439376
ctx-lh-rostralmiddlefrontal	16018	3465.69	16229.8	3719.16	211.759	1.31332	979.535	6.07504	181.895	1.12811	-905	5062	-5.61278	31.3944	0	362.31	2.24704	932.724	5.78472	173.203	1.0742	0	5062	0	31.3944	0.96243	0.94595	0.03593	0.00667	0.89744	0.06263	0.01163	0.25417	0.594866
ctx-lh-superiorfrontal	24006.5	3198.75	23965.6	2943.97	-40.8965	-0.1705	912.403	3.80389	169.429	0.70637	-3821	2404	-15.9301	10.0225	0	435.517	1.81571	798.6	3.32944	148.296	0.61826	0	3821	0	15.9301	0.95735	0.95955	0.02344	0.00435	0.92224	0.04351	0.00808	0.81102	0.0909673
ctx-lh-superiorparietal	13871.1	2144.24	14013.4	2125.22	142.379	1.02121	570.174	4.08954	105.879	0.75941	-1114	2506	-7.9901	17.9741	59	317.69	2.27861	491.49	3.52518	91.2674	0.65461	0	2506	0	17.9741	0.96335	0.94522	0.03286	0.0061	0.89614	0.05902	0.01096	0.1895	0.722388
ctx-lh-superiortemporal	12114.9	1967.83	11973.5	1864.77	-141.345	-1.17355	319.444	2.65227	59.3193	0.49251	-1066	425	-8.85074	3.52867	-73	238.862	1.98321	252.277	2.09459	46.8466	0.38896	0	1066	0	8.85074	0.98389	0.94288	0.03361	0.00624	0.89194	0.06027	0.01119	0.02421	1.61602
ctx-lh-supramarginal	11134.6	1736.29	11052.4	1786.69	-82.1724	-0.74072	373.839	3.36988	69.4202	0.62577	-1637	489	-14.7563	4.40797	-4	213.345	1.92315	315.606	2.84496	58.6067	0.5283	0	1637	0	14.7563	0.97718	0.94906	0.0338	0.00628	0.90305	0.06021	0.01118	0.24649	0.608208
ctx-lh-temporalpole	1978.03	385.259	2056.07	367.921	78.0345	3.86874	207.156	10.2702	38.4679	1.90713	-405	661	-20.0788	32.7706	9	142.448	7.0622	167.941	8.32606	31.1859	1.54611	0	661	0	32.7706	0.83389	0.8879	0.07827	0.01453	0.79839	0.1233	0.0229	0.05211	1.28308
ctx-lh-transversetemporal	1229.41	282.026	1247.97	297.815	18.5517	1.49769	81.9157	6.61309	15.2114	1.22802	-138	329	-11.1408	26.5603	0	47.5172	3.83609	68.7613	5.55113	12.7686	1.03082	0	329	0	26.5603	0.95946	0.90552	0.05119	0.00951	0.82735	0.08916	0.01656	0.23279	0.633032
ctx-rh-bankssts	2360.48	439.216	2385.76	417.102	25.2759	1.06509	194.335	8.18899	36.087	1.52066	-249	859	-10.4925	36.1971	0	104.31	4.39549	164.798	6.94436	30.6022	1.28953	0	859	0	36.1971	0.89878	0.91085	0.05885	0.01093	0.83629	0.09581	0.01779	0.48945	0.310295
ctx-rh-caudalanteriorcingulate	2230.62	660.293	2232.69	676.804	2.06897	0.09271	81.3186	3.64387	15.1005	0.67665	-134	283	-6.00451	12.6812	0	53.5862	2.40119	60.3582	2.70464	11.2082	0.50224	0	283	0	12.6812	0.99285	0.92027	0.04557	0.00846	0.85231	0.08007	0.01487	0.892	0.0496355
ctx-rh-caudalmiddlefrontal	6880.21	1539.57	6881.24	1542.26	1.03448	0.01503	204.924	2.97823	38.0534	0.55304	-333	573	-4.83961	8.32761	0	156.759	2.27823	128.623	1.86933	23.8848	0.34713	0	573	0	8.32761	0.99146	0.94902	0.02729	0.00507	0.90299	0.05032	0.00934	0.9785	0.00943722
ctx-rh-cuneus	3126	487.018	3106.9	548.452	-19.1034	-0.61299	191.835	6.15557	35.6229	1.14306	-678	409	-21.7555	13.1239	0	122.414	3.92799	147.168	4.72229	27.3284	0.87691	0	678	0	21.7555	0.93322	0.89419	0.05623	0.01044	0.80863	0.09668	0.01795	0.59601	0.224747
ctx-rh-entorhinal	1619.83	405.226	1538.55	345.935	-81.2759	-5.14668	214.798	13.6018	39.8871	2.52579	-722	218	-45.7197	13.8046	-4	151.207	9.57497	171.172	10.8392	31.7859	2.0128	0	722	0	45.7197	0.82138	0.82502	0.13664	0.02537	0.70216	0.18808	0.03493	0.05113	1.29129
ctx-rh-frontalpole	894.345	164.107	886.69	183.166	-7.65517	-0.85963	95.714	10.7481	17.7736	1.99588	-250	166	-28.0736	18.6409	0	67.8621	7.62052	66.7242	7.49275	12.3904	1.39137	0	250	0	28.0736	0.85247	0.86742	0.0938	0.01742	0.76587	0.14337	0.02662	0.66998	0.173939
ctx-rh-fusiform	8647.14	1541.18	8773.76	1505.47	126.621	1.45366	387.924	4.45355	72.0357	0.827	-415	1259	-4.76439	14.4539	0	256.207	2.94137	314.808	3.61414	58.4584	0.67113	0	1259	0	14.4539	0.96528	0.91278	0.05097	0.00947	0.83956	0.08825	0.01639	0.08972	1.04711
ctx-rh-inferiorparietal	14773.4	2630.6	14727.5	2490.16	-45.8965	-0.31115	667.684	4.52654	123.986	0.84056	-1515	1788	-10.2709	12.1217	0	436.31	2.95795	500.818	3.39528	92.9995	0.63049	0	1788	0	12.1217	0.96702	0.94824	0.02944	0.00547	0.90157	0.05395	0.01002	0.71404	0.146279
ctx-rh-inferiortemporal	9132.86	2724.13	9221.31	2771.34	88.4483	0.96379	560.901	6.11198	104.157	1.13497	-834	1552	-9.08785	16.9117	0	382.241	4.16517	413.988	4.51111	76.8757	0.83769	0	1552	0	16.9117	0.97936	0.91546	0.05258	0.00976	0.8441	0.0903	0.01677	0.40298	0.394717
ctx-rh-insula	6120.59	813.181	6115.76	815.006	-4.82759	-0.07891	110.407	1.80458	20.5021	0.3351	-275	358	-4.49481	5.85142	0	70	1.14413	84.4918	1.381	15.6897	0.25644	0	358	0	5.85142	0.9911	0.93798	0.03251	0.00604	0.8832	0.05941	0.01103	0.81556	0.088544
ctx-rh-isthmuscingulate	2323.9	426.13	2372.34	457.407	48.4483	2.06328	109.146	4.64822	20.2679	0.86315	-104	442	-4.42907	18.8236	32	77.5517	3.30271	90.0823	3.83636	16.7279	0.71239	0	442	0	18.8236	0.96465	0.88752	0.06014	0.01117	0.79778	0.10199	0.01894	0.0238	1.62345
ctx-rh-lateraloccipital	11549.2	1698.92	11533.4	1794.55	-15.7931	-0.13684	458.742	3.9748	85.1863	0.7381	-1468	1027	-12.7196	8.8985	0	276.552	2.3962	362.616	3.14191	67.3361	0.58344	0	1468	0	12.7196	0.96667	0.93077	0.03989	0.00741	0.87051	0.07096	0.01318	0.85426	0.0684101
ctx-rh-lateralorbitofrontal	7457.31	1133.57	7427.55	1107.71	-29.7586	-0.39985	202.152	2.71621	37.5386	0.50439	-437	326	-5.87174	4.38029	0	145.345	1.95292	141.078	1.89559	26.1975	0.352	0	437	0	5.87174	0.98394	0.93797	0.03109	0.00577	0.88319	0.05724	0.01063	0.43459	0.361919
ctx-rh-lingual	6289.72	916.885	6409.83	905.125	120.103	1.89146	268.161	4.22315	49.7962	0.78422	-262	952	-4.12613	14.9927	36	181.69	2.86136	229.478	3.61395	42.6129	0.67109	0	952	0	14.9927	0.94966	0.90565	0.05125	0.00952	0.82757	0.08864	0.01646	0.02267	1.6445
[truncated: 472 more rows]

## Sheet: OSX10.6 vs. OSX10.5
v4.3.1
[truncated: 568 more rows]
