# Supplementary material for: The Effects of FreeSurfer Version, Workstation Type, and Macintosh Operating System Version on Anatomical Volume and Cortical Thickness Measurements
Source: PLoS One. 2012 Jun 1;7(6):e38234. doi: 10.1371/journal.pone.0038234 (PMC3365894; doi:10.1371/journal.pone.0038234)
Supplement: Table S3 — Detailed statistics of the cortical thickness measurements. (XLS) [file pone.0038234.s005.xls]

## Sheet: Legend
Table S3. Detailed results for the cortical thickness measurements
This EXCEL file consists of four sheets and each sheet contains three blocks.
- Sheet 1 is named “HP vs. Mac” and refers to the comparison between the HP and Macintosh workstations for the Freesurfer versions v4.3.1, v4.5.0, and v5.0.0.
- Sheet 2 is named “Between-version Mac” and shows the results for the comparisons v4.3.1 vs. v4.5.0, v4.3.1 vs. v5.0.0, and v4.5.0 vs. v5.0.0 for the Macintosch (OSX 10.5.8)
- Sheet 3 is named “Between-version HP” and shows the results for the comparisons v4.3.1 vs. v4.5.0, v4.3.1 vs. v5.0.0, and v4.5.0 vs. v5.0.0 for the HP (CentOS 5.3)
- Sheet 4 is named “OSX10.6 vs. OSX10.5” and refers to the comparison between the Mac OSX 10.6.4/5 and OSX 10.5.8 for the Freesurfer versions v4.3.1, v4.5.0, and v5.0.0.
For all comparisons N = 30 pairs were considered.
The columns contain the following statistics as shown in the header row of each block:
- Mean1 and Mean2 are the mean values for measurements 1 and 2, respectively (e.g., for sheet 1, measurement 1 refers to HP and measurement 2 refers to Mac).
- sd1 and sd2 are the corresponding standard deviations.
- Mean diff is the mean value of the differences between the measurements.
- Mean diff % is the percentage mean value of the differences between the measurements taken relative to the mean value of the two measurements.
- sd Diff is the standard deviation of the differences between the measurements.
- sd Diff % is percentage standard deviation of the differences between the measurements taken relative to the mean value of the two measurements.
- se Diff is the standard error of the differences between the measurements.
- se Diff % is percentage standard error of the differences between the measurements taken relative to the mean value of the two measurements.
- min Diff is the minimum of the differences between the measurements.
- min Diff % is the percentage minimum of the differences between the measurements taken relative to the mean value of the two measurements.
- max Diff is the maximum of the differences between the measurements.
- max Diff % is the percentage maximum of the differences between the measurements taken relative to the mean value of the two measurements.
- median is the median value of the differences between the measurements.
- then follow 10 columns referring to the absolute differences AbsDiff.
- ICC is the intra-class correlation coefficient (one-way random effects model, Shrout and Fleiss, 1979)
- p is the p-value derived from the Student t test.
- -log10(p) is the negative value of the 10-based logarithm of the p-value.

## Sheet: HP vs Mac
v4.3.1
Struct	Mean1	sd1	Mean2	sd2	Mean diff	Mean diff %	sd Diff	sd Diff %	se Diff	se Diff %	min Diff	max Diff	min Diff %	max Diff %	median	Mean AbsDiff	Mean AbsDiff %	sd AbsDiff	sd AbsDiff %	se AbsDiff	se AbsDiff %	min AbsDiff	max AbsDiff	min AbsDiff %	max AbsDiff %	ICC	p	-log10(p)
ctx-lh-bankssts	2.38903	0.15735	2.39766	0.1305	0.00862	0.36019	0.0651	2.71984	0.01209	0.50506	-0.122	0.183	-5.09747	7.64621	-0.006	0.04876	2.03726	0.04304	1.79813	0.00799	0.3339	0.005	0.183	0.20891	7.64621	0.90023	0.48164	0.31727
ctx-lh-caudalanteriorcingulate	2.72041	0.21361	2.73441	0.21685	0.014	0.51331	0.0857	3.14207	0.01591	0.58347	-0.214	0.143	-7.84626	5.24307	0.01	0.0669	2.45275	0.05396	1.97855	0.01002	0.36741	0.002	0.214	0.07333	7.84626	0.92133	0.38648	0.41287
ctx-lh-caudalmiddlefrontal	2.68252	0.14857	2.68607	0.14369	0.00355	0.13231	0.02955	1.10084	0.00549	0.20442	-0.086	0.04	-3.20382	1.49015	0.006	0.02252	0.83885	0.019	0.70793	0.00353	0.13146	0.002	0.086	0.0745	3.20382	0.97997	0.52273	0.28172
ctx-lh-cuneus	1.91752	0.11529	1.9259	0.11677	0.00838	0.43604	0.04415	2.29749	0.0082	0.42663	-0.068	0.128	-3.53852	6.66075	0.002	0.03445	1.79259	0.02816	1.46535	0.00523	0.27211	0.002	0.128	0.10407	6.66075	0.9275	0.31551	0.50098
ctx-lh-entorhinal	3.24455	0.41961	3.22969	0.40177	-0.01486	-0.45911	0.14195	4.38521	0.02636	0.81431	-0.289	0.28	-8.92768	8.64966	-0.022	0.11397	3.52058	0.08323	2.57122	0.01546	0.47746	0	0.289	0	8.92768	0.94165	0.57737	0.23854
ctx-lh-frontalpole	2.88914	0.2748	2.89686	0.2689	0.00772	0.26699	0.11579	4.00249	0.0215	0.74324	-0.312	0.239	-10.7846	8.26132	-0.009	0.08138	2.81297	0.0813	2.81039	0.0151	0.52188	0.001	0.312	0.03456	10.7846	0.9119	0.72212	0.14139
ctx-lh-fusiform	2.49741	0.20079	2.51755	0.20366	0.02014	0.80311	0.03669	1.46305	0.00681	0.27168	-0.05	0.113	-1.99404	4.50652	0.022	0.03255	1.29818	0.02585	1.03105	0.0048	0.19146	0.002	0.113	0.07976	4.50652	0.9792	0.00626	2.20341
ctx-lh-inferiorparietal	2.52262	0.14018	2.52969	0.13753	0.00707	0.27983	0.03056	1.20961	0.00567	0.22462	-0.095	0.061	-3.76066	2.41474	0.004	0.02107	0.83403	0.02293	0.90764	0.00426	0.16854	0	0.095	0	3.76066	0.97533	0.22316	0.65138
ctx-lh-inferiortemporal	2.53045	0.19013	2.53848	0.1997	0.00803	0.31701	0.06332	2.49844	0.01176	0.46395	-0.208	0.133	-8.20687	5.24765	0.023	0.04686	1.84899	0.04245	1.67493	0.00788	0.31103	0.005	0.208	0.19728	8.20687	0.9482	0.50004	0.30099
ctx-lh-insula	3.03766	0.1766	3.03807	0.15738	0.00041	0.01362	0.05683	1.87073	0.01055	0.34739	-0.126	0.112	-4.14766	3.6868	0.012	0.04283	1.40979	0.03647	1.20056	0.00677	0.22294	0.002	0.126	0.06583	4.14766	0.94421	0.969	0.01368
ctx-lh-isthmuscingulate	2.66607	0.20225	2.72041	0.19834	0.05434	2.01782	0.06935	2.57514	0.01288	0.47819	-0.037	0.258	-1.37382	9.57953	0.05	0.06441	2.39168	0.05976	2.219	0.0111	0.41206	0.001	0.258	0.03713	9.57953	0.90694	0.00023	3.63354
ctx-lh-lateraloccipital	2.19955	0.09979	2.20131	0.10173	0.00176	0.07992	0.03345	1.52035	0.00621	0.28232	-0.065	0.101	-2.95397	4.59	0	0.02445	1.11107	0.02243	1.01957	0.00417	0.18933	0	0.101	0	4.59	0.94659	0.77919	0.10836
ctx-lh-lateralorbitofrontal	2.68779	0.14858	2.69962	0.14021	0.01183	0.43908	0.04486	1.66528	0.00833	0.30923	-0.098	0.1	-3.63811	3.71235	0.009	0.03645	1.35309	0.02795	1.03759	0.00519	0.19268	0.001	0.1	0.03712	3.71235	0.95014	0.16668	0.77813
ctx-lh-lingual	1.97045	0.09597	1.97128	0.10351	0.00083	0.04199	0.03543	1.79754	0.00658	0.3338	-0.076	0.087	-3.85619	4.41431	0.002	0.02648	1.34372	0.02301	1.16745	0.00427	0.21679	0.002	0.087	0.10148	4.41431	0.93908	0.90079	0.04538
ctx-lh-medialorbitofrontal	2.54469	0.14442	2.55259	0.15512	0.0079	0.30983	0.04964	1.94761	0.00922	0.36166	-0.092	0.106	-3.60976	4.15909	0.011	0.04134	1.62223	0.02753	1.08027	0.00511	0.2006	0.005	0.106	0.19619	4.15909	0.94564	0.39889	0.39915
ctx-lh-middletemporal	2.71207	0.17132	2.71797	0.15481	0.0059	0.21718	0.04081	1.50306	0.00758	0.27911	-0.072	0.09	-2.65192	3.31489	-0.004	0.03245	1.19514	0.02471	0.9103	0.00459	0.16904	0.004	0.09	0.14734	3.31489	0.96918	0.44302	0.35357
ctx-lh-paracentral	2.48079	0.1282	2.48069	0.12399	-0.0001	-0.00417	0.04166	1.67925	0.00774	0.31183	-0.11	0.093	-4.43416	3.74889	-0.002	0.03079	1.24129	0.02745	1.10638	0.0051	0.20545	0.001	0.11	0.04032	4.43416	0.94727	0.98943	0.00462
ctx-lh-parahippocampal	2.60286	0.30568	2.60052	0.3095	-0.00234	-0.09013	0.12018	4.61917	0.02232	0.85776	-0.418	0.238	-16.0665	9.14791	0.03	0.08324	3.19951	0.08527	3.2776	0.01583	0.60863	0	0.418	0	16.0665	0.92618	0.91707	0.0376
ctx-lh-parsopercularis	2.63807	0.14683	2.64931	0.14651	0.01124	0.42522	0.03533	1.33642	0.00656	0.24817	-0.066	0.076	-2.49651	2.87477	0.01	0.02952	1.11652	0.02183	0.82592	0.00405	0.15337	0.004	0.076	0.1513	2.87477	0.96908	0.09769	1.01017
ctx-lh-parsorbitalis	2.79838	0.21739	2.785	0.23027	-0.01338	-0.47926	0.05342	1.91346	0.00992	0.35532	-0.163	0.06	-5.83875	2.14923	-0.008	0.04034	1.44518	0.03678	1.3176	0.00683	0.24467	0	0.163	0	5.83875	0.97075	0.18821	0.72536
ctx-lh-parstriangularis	2.57972	0.19899	2.57755	0.18092	-0.00217	-0.08425	0.05254	2.03743	0.00976	0.37834	-0.138	0.11	-5.35166	4.26582	0.005	0.0361	1.4001	0.03762	1.45882	0.00699	0.2709	0.002	0.138	0.07755	5.35166	0.96307	0.82541	0.08333
ctx-lh-pericalcarine	1.68803	0.14913	1.70276	0.13018	0.01472	0.86848	0.06342	3.7409	0.01178	0.69467	-0.138	0.221	-8.13969	13.0353	0.01	0.04348	2.56475	0.04784	2.82182	0.00888	0.524	0	0.221	0	13.0353	0.89546	0.22157	0.65448
ctx-lh-postcentral	2.2469	0.13788	2.24272	0.12915	-0.00417	-0.18587	0.03545	1.57921	0.00658	0.29325	-0.13	0.048	-5.79114	2.13826	0	0.01907	0.84947	0.02997	1.33503	0.00557	0.24791	0	0.13	0	5.79114	0.9655	0.53134	0.27463
ctx-lh-posteriorcingulate	2.69693	0.15091	2.73155	0.14085	0.03462	1.27552	0.0473	1.74284	0.00878	0.32364	-0.051	0.135	-1.87898	4.97377	0.041	0.04855	1.78878	0.03221	1.18682	0.00598	0.22039	0.001	0.135	0.03684	4.97377	0.92219	0.00049	3.30816
ctx-lh-precentral	2.62428	0.13278	2.63021	0.12646	0.00593	0.22575	0.02895	1.10175	0.00538	0.20459	-0.044	0.069	-1.67477	2.62633	0.002	0.02159	0.82163	0.01979	0.7533	0.00368	0.13988	0.001	0.069	0.03806	2.62633	0.9749	0.27923	0.55403
ctx-lh-precuneus	2.46486	0.17112	2.47393	0.16764	0.00907	0.36725	0.0228	0.9235	0.00423	0.17149	-0.043	0.066	-1.74132	2.67272	0.01	0.01928	0.78059	0.01485	0.60122	0.00276	0.11164	0.001	0.066	0.0405	2.67272	0.98982	0.04107	1.38643
ctx-lh-rostralanteriorcingulate	2.87424	0.21721	2.89262	0.21243	0.01838	0.63741	0.07189	2.49331	0.01335	0.463	-0.161	0.146	-5.58363	5.06341	0.034	0.06093	2.11314	0.04091	1.41865	0.0076	0.26344	0.001	0.161	0.03468	5.58363	0.94233	0.17951	0.74591
ctx-lh-rostralmiddlefrontal	2.48979	0.13279	2.49669	0.12476	0.0069	0.27661	0.02947	1.18207	0.00547	0.21951	-0.103	0.075	-4.13117	3.00813	0.012	0.0211	0.84643	0.02137	0.85704	0.00397	0.15915	0.003	0.103	0.12033	4.13117	0.97331	0.21802	0.66151
ctx-lh-superiorfrontal	2.88945	0.15263	2.8919	0.14761	0.00245	0.0847	0.02547	0.88118	0.00473	0.16363	-0.074	0.042	-2.55995	1.45294	0.003	0.01721	0.59526	0.01867	0.6457	0.00347	0.1199	0	0.074	0	2.55995	0.98597	0.6088	0.21552
ctx-lh-superiorparietal	2.38814	0.15585	2.38724	0.15028	-0.0009	-0.03755	0.02313	0.96855	0.00429	0.17986	-0.052	0.049	-2.17784	2.05219	0.001	0.0169	0.70765	0.01549	0.64876	0.00288	0.12047	0.001	0.052	0.04188	2.17784	0.98896	0.83614	0.07772
ctx-lh-superiortemporal	2.79966	0.17447	2.79724	0.17108	-0.00241	-0.08625	0.03928	1.40366	0.00729	0.26065	-0.122	0.069	-4.35956	2.46565	-0.002	0.02697	0.96359	0.02821	1.00811	0.00524	0.1872	0	0.122	0	4.35956	0.97494	0.74317	0.12891
ctx-lh-supramarginal	2.57786	0.14694	2.58766	0.14778	0.00979	0.37917	0.03158	1.22291	0.00587	0.22709	-0.081	0.081	-3.13619	3.13618	0.008	0.02393	0.92657	0.02245	0.86903	0.00417	0.16138	0.001	0.081	0.03872	3.13619	0.97563	0.10612	0.9742
ctx-lh-temporalpole	3.59272	0.33436	3.59307	0.34056	0.00034	0.0096	0.14528	4.04367	0.02698	0.75089	-0.359	0.328	-9.99194	9.12913	0.013	0.10959	3.05008	0.09311	2.59154	0.01729	0.48124	0.002	0.359	0.05566	9.99194	0.91038	0.98989	0.00441
ctx-lh-transversetemporal	2.34886	0.16896	2.33572	0.17916	-0.01314	-0.5609	0.05675	2.42278	0.01054	0.4499	-0.161	0.111	-6.87361	4.73894	-0.02	0.04486	1.91531	0.03626	1.548	0.00673	0.28746	0.007	0.161	0.29885	6.87361	0.94591	0.22283	0.65203
ctx-rh-bankssts	2.54069	0.18004	2.53624	0.17559	-0.00445	-0.17523	0.04145	1.63302	0.0077	0.30324	-0.098	0.077	-3.8606	3.03333	-0.001	0.03245	1.27826	0.02546	1.00311	0.00473	0.18627	0.001	0.098	0.0394	3.8606	0.97345	0.56797	0.24567
ctx-rh-caudalanteriorcingulate	2.63814	0.21005	2.65486	0.21497	0.01672	0.63193	0.06115	2.31072	0.01136	0.42909	-0.155	0.115	-5.85679	4.34536	0.018	0.05155	1.94792	0.03573	1.35023	0.00664	0.25073	0.001	0.155	0.03779	5.85679	0.95697	0.15198	0.81822
ctx-rh-caudalmiddlefrontal	2.67466	0.14724	2.67848	0.15069	0.00383	0.143	0.02551	0.95311	0.00474	0.17699	-0.066	0.047	-2.46584	1.75599	0.01	0.02031	0.75882	0.01545	0.57725	0.00287	0.10719	0	0.066	0	2.46584	0.98551	0.42591	0.37068
ctx-rh-cuneus	1.92593	0.11758	1.92197	0.12362	-0.00397	-0.20611	0.03361	1.74718	0.00624	0.32444	-0.052	0.108	-2.70277	5.61346	-0.004	0.02307	1.19904	0.02439	1.26791	0.00453	0.23545	0	0.108	0	5.61346	0.96196	0.5304	0.27539
ctx-rh-entorhinal	3.39155	0.53351	3.4091	0.47066	0.01755	0.51618	0.1792	5.27004	0.03328	0.97862	-0.412	0.416	-12.1165	12.2341	-0.001	0.13452	3.95601	0.117	3.44099	0.02173	0.63897	0.001	0.416	0.02941	12.2341	0.93809	0.60203	0.22038
ctx-rh-frontalpole	2.85852	0.26751	2.86872	0.28526	0.01021	0.35643	0.06536	2.28226	0.01214	0.4238	-0.114	0.129	-3.98098	4.50478	0.015	0.05662	1.97724	0.03254	1.1363	0.00604	0.21101	0.005	0.129	0.17461	4.50478	0.97235	0.40746	0.38992
ctx-rh-fusiform	2.57076	0.22632	2.57769	0.22093	0.00693	0.26925	0.05769	2.24087	0.01071	0.41612	-0.108	0.163	-4.19544	6.332	0.005	0.04452	1.72935	0.0364	1.41391	0.00676	0.26256	0.002	0.163	0.07769	6.332	0.96739	0.52287	0.2816
ctx-rh-inferiorparietal	2.57193	0.14964	2.57631	0.14729	0.00438	0.17013	0.02393	0.92954	0.00444	0.17261	-0.038	0.058	-1.47624	2.25319	-0.004	0.01962	0.76223	0.01392	0.54064	0.00258	0.10039	0.001	0.058	0.03885	2.25319	0.98703	0.33277	0.47786
ctx-rh-inferiortemporal	2.58834	0.22991	2.60045	0.23045	0.0121	0.46652	0.06755	2.60384	0.01254	0.48352	-0.135	0.133	-5.20352	5.12643	0.01	0.05507	2.12261	0.03968	1.52938	0.00737	0.284	0.001	0.135	0.03854	5.20352	0.95704	0.34288	0.46485
ctx-rh-insula	3.02531	0.15319	3.03031	0.15786	0.005	0.16514	0.05908	1.95118	0.01097	0.36232	-0.067	0.171	-2.21282	5.64765	-0.01	0.04534	1.49761	0.03724	1.2298	0.00691	0.22837	0.004	0.171	0.13211	5.64765	0.92977	0.65207	0.1857
ctx-rh-isthmuscingulate	2.6119	0.23284	2.63738	0.22474	0.02548	0.97091	0.07053	2.68719	0.0131	0.499	-0.192	0.218	-7.31529	8.30591	0.022	0.05314	2.02458	0.05218	1.98796	0.00969	0.36915	0	0.218	0	8.30591	0.94806	0.06179	1.20907
ctx-rh-lateraloccipital	2.26366	0.14134	2.26717	0.12223	0.00352	0.15526	0.0347	1.53179	0.00644	0.28445	-0.106	0.076	-4.67905	3.35479	0.001	0.02572	1.13552	0.02306	1.01779	0.00428	0.189	0	0.106	0	4.67905	0.96633	0.58951	0.22951
ctx-rh-lateralorbitofrontal	2.62748	0.15718	2.64659	0.16361	0.0191	0.72443	0.05128	1.94478	0.00952	0.36114	-0.065	0.127	-2.46488	4.81602	0.018	0.04476	1.69731	0.03055	1.15843	0.00567	0.21511	0.002	0.127	0.07584	4.81602	0.94373	0.05461	1.26275
ctx-rh-lingual	1.97441	0.11225	1.96414	0.10592	-0.01028	-0.52181	0.03816	1.93778	0.00709	0.35984	-0.099	0.088	-5.02723	4.46864	-0.001	0.02876	1.46037	0.02663	1.3521	0.00494	0.25108	0.001	0.099	0.05078	5.02723	0.93661	0.15813	0.80097
ctx-rh-medialorbitofrontal	2.48307	0.16939	2.48855	0.15285	0.00548	0.22056	0.04403	1.77114	0.00818	0.32889	-0.11	0.147	-4.42511	5.91356	0.007	0.02948	1.18604	0.0327	1.31545	0.00607	0.24427	0.002	0.147	0.08046	5.91356	0.96346	0.50796	0.29417
ctx-rh-middletemporal	2.74772	0.18316	2.74279	0.17366	-0.00493	-0.17962	0.05283	1.92443	0.00981	0.35736	-0.115	0.101	-4.18904	3.67907	0.004	0.04059	1.47841	0.03332	1.21371	0.00619	0.22538	0.003	0.115	0.10928	4.18904	0.95729	0.61915	0.2082
ctx-rh-paracentral	2.53586	0.17222	2.52817	0.17296	-0.00769	-0.3037	0.02781	1.09821	0.00516	0.20393	-0.061	0.043	-2.40914	1.69825	-0.008	0.02383	0.94105	0.0157	0.61999	0.00292	0.11513	0.001	0.061	0.03949	2.40914	0.98648	0.14761	0.83087
ctx-rh-parahippocampal	2.55431	0.29012	2.57772	0.32179	0.02341	0.91246	0.08881	3.46094	0.01649	0.64268	-0.154	0.194	-6.00152	7.56035	0.041	0.07652	2.98195	0.04889	1.90547	0.00908	0.35384	0.006	0.194	0.23382	7.56035	0.95655	0.16671	0.77803
ctx-rh-parsopercularis	2.69855	0.17394	2.699	0.17044	0.00045	0.01661	0.03829	1.41865	0.00711	0.26344	-0.076	0.093	-2.8161	3.446	-0.001	0.02797	1.03623	0.02561	0.94907	0.00476	0.17624	0.001	0.093	0.03705	3.446	0.97612	0.95017	0.0222
ctx-rh-parsorbitalis	2.8079	0.17936	2.8039	0.18403	-0.004	-0.14256	0.05875	2.09381	0.01091	0.38881	-0.128	0.098	-4.56181	3.49265	-0.008	0.0469	1.67136	0.0345	1.22958	0.00641	0.22833	0.003	0.128	0.10692	4.56181	0.94925	0.71664	0.1447
ctx-rh-parstriangularis	2.60521	0.15463	2.61248	0.16397	0.00728	0.27889	0.03793	1.45406	0.00704	0.27001	-0.053	0.102	-2.03155	3.90978	0.002	0.02859	1.09574	0.02545	0.97535	0.00473	0.18112	0.001	0.102	0.03833	3.90978	0.97161	0.31049	0.50795
ctx-rh-pericalcarine	1.67121	0.12584	1.67959	0.12065	0.00838	0.50014	0.04084	2.43783	0.00758	0.45269	-0.045	0.117	-2.68594	6.98342	-0.001	0.02928	1.7474	0.02921	1.74345	0.00542	0.32375	0	0.117	0	6.98342	0.94471	0.27865	0.55495
ctx-rh-postcentral	2.23038	0.12991	2.22828	0.1253	-0.0021	-0.09435	0.02274	1.01989	0.00422	0.18939	-0.052	0.043	-2.33254	1.92883	-0.003	0.01734	0.77803	0.01449	0.64995	0.00269	0.12069	0.001	0.052	0.04485	2.33254	0.98454	0.62223	0.20605
ctx-rh-posteriorcingulate	2.67476	0.16829	2.72652	0.16112	0.05176	1.91653	0.04347	1.60958	0.00807	0.29889	-0.047	0.143	-1.74033	5.29505	0.05	0.05528	2.04677	0.03873	1.43393	0.00719	0.26627	0	0.143	0	5.29505	0.91899	0	6.22472
ctx-rh-precentral	2.61831	0.14874	2.6229	0.13955	0.00459	0.17501	0.02336	0.89145	0.00434	0.16554	-0.05	0.05	-1.90796	1.90796	0.006	0.01886	0.71976	0.01411	0.53837	0.00262	0.09997	0.002	0.05	0.07632	1.90796	0.98683	0.29946	0.52366
ctx-rh-precuneus	2.49183	0.17411	2.49859	0.17123	0.00676	0.27086	0.02924	1.1718	0.00543	0.2176	-0.051	0.063	-2.04392	2.52484	0.002	0.02421	0.97013	0.01718	0.68871	0.00319	0.12789	0.002	0.063	0.08016	2.52484	0.98539	0.22352	0.65068
ctx-rh-rostralanteriorcingulate	2.90493	0.24704	2.91976	0.25577	0.01483	0.50913	0.11462	3.93559	0.02128	0.73082	-0.199	0.387	-6.83298	13.2883	0.01	0.07972	2.73745	0.08235	2.82773	0.01529	0.5251	0.006	0.387	0.20602	13.2883	0.89785	0.49176	0.30824
ctx-rh-rostralmiddlefrontal	2.47352	0.1219	2.47659	0.11761	0.00307	0.124	0.02539	1.02588	0.00472	0.1905	-0.05	0.063	-2.02016	2.5454	0.001	0.0199	0.80388	0.01563	0.6317	0.0029	0.1173	0.001	0.063	0.0404	2.5454	0.97797	0.52042	0.28365
ctx-rh-superiorfrontal	2.84345	0.15454	2.84248	0.15586	-0.00097	-0.03396	0.02726	0.95881	0.00506	0.17805	-0.052	0.072	-1.82908	2.53257	0	0.02159	0.75928	0.01617	0.56869	0.003	0.1056	0	0.072	0	2.53257	0.98508	0.8501	0.07053
ctx-rh-superiorparietal	2.39931	0.1654	2.40183	0.16809	0.00252	0.10486	0.01684	0.70145	0.00313	0.13026	-0.031	0.042	-1.29137	1.74959	-0.001	0.01279	0.53292	0.01098	0.45747	0.00204	0.08495	0.001	0.042	0.04165	1.74959	0.99496	0.42759	0.36898
ctx-rh-superiortemporal	2.8289	0.19187	2.83097	0.18484	0.00207	0.07311	0.03852	1.36103	0.00715	0.25274	-0.105	0.06	-3.71034	2.1202	0.006	0.02752	0.97237	0.02653	0.93738	0.00493	0.17407	0	0.105	0	3.71034	0.97975	0.77451	0.11098
ctx-rh-supramarginal	2.65659	0.15908	2.65897	0.15508	0.00238	0.08952	0.03035	1.14201	0.00564	0.21207	-0.05	0.069	-1.88127	2.59616	0.005	0.02362	0.88874	0.01869	0.70315	0.00347	0.13057	0.002	0.069	0.07525	2.59616	0.98186	0.67614	0.16996
ctx-rh-temporalpole	3.59779	0.50774	3.64883	0.47102	0.05103	1.4085	0.18428	5.08592	0.03422	0.94443	-0.236	0.625	-6.51338	17.2494	0.045	0.13855	3.8239	0.12951	3.57448	0.02405	0.66376	0.003	0.625	0.0828	17.2494	0.92632	0.14704	0.83255
ctx-rh-transversetemporal	2.33124	0.2301	2.34066	0.23129	0.00941	0.403	0.07729	3.30858	0.01435	0.61439	-0.129	0.224	-5.52239	9.58925	-0.005	0.05472	2.3427	0.05444	2.33039	0.01011	0.43274	0.004	0.224	0.17123	9.58925	0.94495	0.51722	0.28632
v4.5.0
Struct	Mean1	sd1	Mean2	sd2	Mean diff	Mean diff %	sd Diff	sd Diff %	se Diff	se Diff %	min Diff	max Diff	min Diff %	max Diff %	median	Mean AbsDiff	Mean AbsDiff %	sd AbsDiff	sd AbsDiff %	se AbsDiff	se AbsDiff %	min AbsDiff	max AbsDiff	min AbsDiff %	max AbsDiff %	ICC(1,1)	p	-log10(p)
ctx-lh-bankssts	2.39141	0.15835	2.39497	0.14789	0.00355	0.14841	0.07277	3.04067	0.01351	0.56464	-0.122	0.246	-5.0978	10.2792	-0.006	0.05114	2.13681	0.05099	2.1306	0.00947	0.39564	0.001	0.246	0.04178	10.2792	0.89063	0.7946	0.09985
ctx-lh-caudalanteriorcingulate	2.71186	0.20656	2.72662	0.22176	0.01476	0.54275	0.06991	2.57096	0.01298	0.47741	-0.135	0.143	-4.96462	5.25882	0.023	0.05731	2.10759	0.04137	1.5213	0.00768	0.2825	0.001	0.143	0.03678	5.25882	0.94626	0.26524	0.57636
ctx-lh-caudalmiddlefrontal	2.68469	0.14766	2.68676	0.14693	0.00207	0.07704	0.03039	1.13155	0.00564	0.21012	-0.057	0.068	-2.12234	2.53191	0.003	0.024	0.89361	0.01821	0.67785	0.00338	0.12587	0.003	0.068	0.1117	2.53191	0.97934	0.71666	0.14469
ctx-lh-cuneus	1.91655	0.11591	1.92866	0.12197	0.0121	0.62953	0.04498	2.33935	0.00835	0.43441	-0.097	0.147	-5.04524	7.64588	0.003	0.03224	1.67696	0.03314	1.72348	0.00615	0.32004	0.002	0.147	0.10402	7.64588	0.92594	0.1584	0.80026
ctx-lh-entorhinal	3.23897	0.41611	3.24355	0.40977	0.00459	0.1415	0.1414	4.36239	0.02626	0.81007	-0.293	0.28	-9.0397	8.63862	-0.011	0.11307	3.48843	0.0823	2.53918	0.01528	0.47151	0.011	0.293	0.33938	9.0397	0.94328	0.8626	0.06419
ctx-lh-frontalpole	2.90528	0.27162	2.91283	0.30314	0.00755	0.25959	0.11067	3.80436	0.02055	0.70645	-0.301	0.242	-10.347	8.31886	0.034	0.0819	2.81523	0.07322	2.51682	0.0136	0.46736	0.005	0.301	0.17187	10.347	0.9282	0.71604	0.14506
ctx-lh-fusiform	2.50531	0.19937	2.5101	0.19894	0.00479	0.19113	0.04452	1.7752	0.00827	0.32965	-0.108	0.095	-4.30673	3.78832	-0.002	0.03603	1.43695	0.0257	1.02499	0.00477	0.19034	0.002	0.108	0.07975	4.30673	0.97558	0.56667	0.24667
ctx-lh-inferiorparietal	2.52631	0.13965	2.52559	0.13836	-0.00072	-0.02867	0.0359	1.42107	0.00667	0.26389	-0.095	0.065	-3.76096	2.57329	-0.005	0.02679	1.06072	0.02336	0.92466	0.00434	0.17171	0.003	0.095	0.11877	3.76096	0.96778	0.91427	0.03893
ctx-lh-inferiortemporal	2.53959	0.17296	2.53283	0.1889	-0.00676	-0.26649	0.06866	2.70733	0.01275	0.50274	-0.208	0.157	-8.20123	6.19035	-0.006	0.04607	1.81645	0.05063	1.99647	0.0094	0.37073	0.001	0.208	0.03943	8.20123	0.92985	0.60024	0.22167
ctx-lh-insula	3.042	0.17245	3.04317	0.17727	0.00117	0.03853	0.0466	1.53167	0.00865	0.28442	-0.126	0.098	-4.14122	3.22094	0.003	0.0351	1.15374	0.02995	0.98433	0.00556	0.18279	0.003	0.126	0.0986	4.14122	0.96567	0.8932	0.04905
ctx-lh-isthmuscingulate	2.65055	0.21403	2.71066	0.20147	0.0601	2.24216	0.07974	2.97457	0.01481	0.55236	-0.047	0.317	-1.75333	11.8257	0.033	0.065	2.42483	0.07565	2.82225	0.01405	0.52408	0.001	0.317	0.0373	11.8257	0.88931	0.00036	3.44556
ctx-lh-lateraloccipital	2.19931	0.10591	2.1941	0.09926	-0.00521	-0.23703	0.03403	1.54913	0.00632	0.28767	-0.108	0.056	-4.91645	2.54927	-0.001	0.0241	1.09725	0.02417	1.10047	0.00449	0.20435	0	0.108	0	4.91645	0.94563	0.41691	0.37995
ctx-lh-lateralorbitofrontal	2.69248	0.15229	2.69493	0.142	0.00245	0.09089	0.04464	1.65727	0.00829	0.30775	-0.098	0.1	-3.63811	3.71235	0.009	0.03417	1.2686	0.0281	1.0432	0.00522	0.19372	0.002	0.1	0.07425	3.71235	0.95545	0.76992	0.11356
ctx-lh-lingual	1.96693	0.10188	1.96983	0.10304	0.0029	0.14715	0.0374	1.89993	0.00694	0.35281	-0.094	0.063	-4.77551	3.2006	0.005	0.02917	1.48205	0.02293	1.165	0.00426	0.21634	0.004	0.094	0.20321	4.77551	0.93523	0.67979	0.16763
ctx-lh-medialorbitofrontal	2.54059	0.15491	2.54669	0.16	0.0061	0.23995	0.05742	2.25748	0.01066	0.4192	-0.124	0.107	-4.87491	4.20657	0.006	0.04328	1.70134	0.03737	1.46899	0.00694	0.27279	0.003	0.124	0.11793	4.87491	0.93501	0.57162	0.24289
ctx-lh-middletemporal	2.7181	0.17965	2.71928	0.16692	0.00117	0.04312	0.06514	2.39613	0.0121	0.44495	-0.123	0.164	-4.52423	6.03232	-0.005	0.05007	1.84166	0.0406	1.49349	0.00754	0.27733	0.002	0.164	0.07357	6.03232	0.93176	0.92348	0.03457
ctx-lh-paracentral	2.48166	0.12621	2.47738	0.12525	-0.00428	-0.17245	0.04684	1.88917	0.0087	0.35081	-0.142	0.102	-5.72692	4.1137	-0.001	0.03414	1.3768	0.03172	1.27926	0.00589	0.23755	0.001	0.142	0.04033	5.72692	0.93235	0.62686	0.20283
ctx-lh-parahippocampal	2.58831	0.30805	2.60631	0.3184	0.018	0.69303	0.08677	3.34061	0.01611	0.62034	-0.145	0.251	-5.5827	9.66384	0.007	0.0631	2.42957	0.06115	2.35447	0.01136	0.43721	0.001	0.251	0.0385	9.66384	0.96132	0.27341	0.56318
ctx-lh-parsopercularis	2.64331	0.15479	2.65293	0.15534	0.00962	0.3633	0.02671	1.00861	0.00496	0.18729	-0.066	0.076	-2.49233	2.86996	0.009	0.02134	0.80604	0.01837	0.69362	0.00341	0.1288	0.002	0.076	0.07553	2.86996	0.98376	0.06255	1.2038
ctx-lh-parsorbitalis	2.7901	0.2214	2.79231	0.23075	0.00221	0.07907	0.05628	2.01647	0.01045	0.37445	-0.118	0.144	-4.22756	5.15906	0.016	0.04448	1.59368	0.03352	1.20089	0.00622	0.223	0	0.144	0	5.15906	0.97003	0.8343	0.07868
ctx-lh-parstriangularis	2.57303	0.19348	2.59148	0.18453	0.01845	0.71443	0.06204	2.40266	0.01152	0.44616	-0.138	0.148	-5.34416	5.73142	0.016	0.04576	1.77204	0.04509	1.74618	0.00837	0.32426	0.001	0.148	0.03872	5.73142	0.94333	0.12054	0.91886
ctx-lh-pericalcarine	1.7061	0.14205	1.69921	0.13361	-0.0069	-0.40505	0.0473	2.77789	0.00878	0.51584	-0.138	0.077	-8.10499	4.52235	0	0.036	2.11434	0.03073	1.80458	0.00571	0.3351	0	0.138	0	8.10499	0.94193	0.43892	0.35761
ctx-lh-postcentral	2.24548	0.13724	2.244	0.13297	-0.00148	-0.06606	0.0231	1.02894	0.00429	0.19107	-0.092	0.03	-4.09847	1.33646	0.004	0.01445	0.64365	0.01788	0.79634	0.00332	0.14788	0.001	0.092	0.04455	4.09847	0.98583	0.73214	0.13541
ctx-lh-posteriorcingulate	2.69034	0.15695	2.72679	0.15496	0.03645	1.34567	0.05442	2.0093	0.01011	0.37312	-0.051	0.153	-1.88292	5.64873	0.043	0.05479	2.02295	0.03505	1.29394	0.00651	0.24028	0.002	0.153	0.07384	5.64873	0.91498	0.00119	2.92313
ctx-lh-precentral	2.62897	0.12895	2.62721	0.13129	-0.00176	-0.06692	0.02158	0.82112	0.00401	0.15248	-0.044	0.033	-1.67422	1.25567	0.003	0.01734	0.65998	0.01254	0.47724	0.00233	0.08862	0.001	0.044	0.03805	1.67422	0.98663	0.66414	0.17774
ctx-lh-precuneus	2.46803	0.17393	2.47083	0.16778	0.00279	0.11311	0.02203	0.89204	0.00409	0.16565	-0.043	0.052	-1.74129	2.10575	0.004	0.01817	0.7359	0.0123	0.49809	0.00228	0.09249	0.001	0.052	0.04049	2.10575	0.99184	0.50033	0.30074
ctx-lh-rostralanteriorcingulate	2.88407	0.2235	2.88293	0.21598	-0.00114	-0.03946	0.078	2.70492	0.01448	0.50229	-0.164	0.146	-5.68753	5.06329	-0.001	0.06066	2.10353	0.04769	1.65388	0.00886	0.30712	0.001	0.164	0.03468	5.68753	0.93912	0.93794	0.02783
ctx-lh-rostralmiddlefrontal	2.496	0.13164	2.49469	0.13233	-0.00131	-0.05251	0.03188	1.27778	0.00592	0.23728	-0.103	0.054	-4.12769	2.16403	0.01	0.02414	0.96732	0.02037	0.81636	0.00378	0.15159	0.004	0.103	0.16031	4.12769	0.97176	0.82646	0.08278
ctx-lh-superiorfrontal	2.89117	0.15455	2.88869	0.16093	-0.00248	-0.08591	0.0294	1.01739	0.00546	0.18892	-0.074	0.065	-2.56061	2.24919	0.003	0.02048	0.70876	0.02089	0.7228	0.00388	0.13422	0	0.074	0	2.56061	0.98311	0.65281	0.18521
ctx-lh-superiorparietal	2.38969	0.15363	2.38862	0.15488	-0.00107	-0.04474	0.01925	0.80588	0.00358	0.14965	-0.051	0.043	-2.13465	1.7998	0.003	0.01452	0.60763	0.01239	0.51877	0.0023	0.09633	0.001	0.051	0.04185	2.13465	0.99245	0.76716	0.11511
ctx-lh-superiortemporal	2.80183	0.17029	2.79993	0.17227	-0.0019	-0.06771	0.0383	1.36732	0.00711	0.25391	-0.122	0.071	-4.35577	2.53492	0	0.02576	0.91966	0.02799	0.99917	0.0052	0.18554	0	0.122	0	4.35577	0.97579	0.79167	0.10146
ctx-lh-supramarginal	2.57807	0.14758	2.5831	0.15014	0.00503	0.19509	0.02913	1.12875	0.00541	0.2096	-0.081	0.056	-3.13883	2.17005	0.007	0.02214	0.85786	0.01916	0.74249	0.00356	0.13788	0.001	0.081	0.03875	3.13883	0.98094	0.35993	0.44378
ctx-lh-temporalpole	3.61666	0.33301	3.54948	0.34708	-0.06717	-1.87472	0.15195	4.24067	0.02822	0.78747	-0.473	0.164	-13.201	4.57708	-0.019	0.10724	2.993	0.12589	3.5136	0.02338	0.65246	0	0.473	0	13.201	0.88507	0.02432	1.61397
ctx-lh-transversetemporal	2.35255	0.18515	2.33824	0.15665	-0.01431	-0.61015	0.06525	2.78219	0.01212	0.51664	-0.161	0.164	-6.86451	6.99242	-0.018	0.04928	2.10096	0.04422	1.88533	0.00821	0.3501	0	0.164	0	6.99242	0.92666	0.24754	0.60635
ctx-rh-bankssts	2.53924	0.17811	2.54307	0.16967	0.00383	0.15062	0.04006	1.57627	0.00744	0.29271	-0.069	0.091	-2.7153	3.58105	0.007	0.03203	1.26063	0.0236	0.92854	0.00438	0.17242	0.001	0.091	0.03936	3.58105	0.97415	0.61088	0.21405
ctx-rh-caudalanteriorcingulate	2.62045	0.20374	2.66203	0.22152	0.04159	1.57449	0.07662	2.90094	0.01423	0.53869	-0.104	0.234	-3.93755	8.85947	0.046	0.07	2.65027	0.05086	1.92568	0.00944	0.35759	0.011	0.234	0.41647	8.85947	0.91901	0.00679	2.16793
ctx-rh-caudalmiddlefrontal	2.66972	0.14512	2.67152	0.15554	0.00179	0.06714	0.0243	0.91004	0.00451	0.16899	-0.062	0.052	-2.32156	1.94711	-0.003	0.01821	0.68175	0.01583	0.59284	0.00294	0.11009	0.001	0.062	0.03744	2.32156	0.98732	0.69415	0.15855
ctx-rh-cuneus	1.9221	0.12114	1.92279	0.12302	0.00069	0.03587	0.02286	1.18919	0.00425	0.22083	-0.039	0.049	-2.02866	2.54883	0.002	0.0189	0.98294	0.01238	0.64407	0.0023	0.1196	0.002	0.049	0.10404	2.54883	0.98305	0.87212	0.05943
ctx-rh-entorhinal	3.37383	0.52527	3.40093	0.52377	0.0271	0.80013	0.15624	4.61238	0.02901	0.8565	-0.198	0.455	-5.84523	13.4322	-0.021	0.11497	3.39394	0.10716	3.16338	0.0199	0.58742	0.009	0.455	0.26569	13.4322	0.95583	0.35819	0.44588
ctx-rh-frontalpole	2.86259	0.29687	2.89862	0.29015	0.03603	1.25094	0.08938	3.10294	0.0166	0.5762	-0.202	0.228	-7.01242	7.91501	0.034	0.07555	2.62277	0.0585	2.03085	0.01086	0.37712	0.01	0.228	0.34715	7.91501	0.94785	0.03856	1.41384
ctx-rh-fusiform	2.58314	0.2172	2.58172	0.2248	-0.00141	-0.05475	0.05539	2.145	0.01029	0.39832	-0.114	0.132	-4.41445	5.11146	-0.011	0.04479	1.73453	0.0315	1.21986	0.00585	0.22652	0.004	0.132	0.15489	5.11146	0.96964	0.89166	0.0498
ctx-rh-inferiorparietal	2.57059	0.14521	2.57569	0.15208	0.0051	0.19834	0.02733	1.06225	0.00508	0.19725	-0.054	0.052	-2.0986	2.02088	0.005	0.02145	0.83355	0.01725	0.67045	0.0032	0.1245	0.001	0.054	0.03886	2.0986	0.9831	0.32328	0.49043
ctx-rh-inferiortemporal	2.59362	0.22365	2.59714	0.23511	0.00352	0.13552	0.05774	2.22477	0.01072	0.41313	-0.083	0.145	-3.198	5.58685	-0.002	0.04517	1.74049	0.03512	1.35319	0.00652	0.25128	0.001	0.145	0.03853	5.58685	0.9693	0.74533	0.12765
ctx-rh-insula	3.01552	0.14906	3.02921	0.15895	0.01369	0.45295	0.0485	1.60457	0.00901	0.29796	-0.074	0.118	-2.44841	3.90423	0.013	0.03859	1.27669	0.03168	1.04833	0.00588	0.19467	0.003	0.118	0.09926	3.90423	0.94829	0.13969	0.85484
ctx-rh-isthmuscingulate	2.60483	0.20203	2.65683	0.21861	0.052	1.97656	0.06535	2.4841	0.01214	0.46129	-0.045	0.201	-1.71049	7.64018	0.051	0.06593	2.5061	0.05069	1.92672	0.00941	0.35778	0.003	0.201	0.11403	7.64018	0.92404	0.00019	3.71017
ctx-rh-lateraloccipital	2.26697	0.13351	2.26555	0.12973	-0.00141	-0.06238	0.03813	1.68271	0.00708	0.31247	-0.106	0.089	-4.67731	3.92718	0.002	0.02583	1.13966	0.02767	1.2208	0.00514	0.2267	0	0.106	0	4.67731	0.9594	0.8432	0.07407
ctx-rh-lateralorbitofrontal	2.63662	0.15267	2.64848	0.1642	0.01186	0.44889	0.04634	1.75344	0.0086	0.32561	-0.071	0.078	-2.6868	2.95169	0.002	0.03931	1.48759	0.02631	0.99563	0.00489	0.18488	0.002	0.078	0.07569	2.95169	0.95599	0.17893	0.74732
ctx-rh-lingual	1.97552	0.11816	1.96614	0.10987	-0.00938	-0.47591	0.03273	1.66066	0.00608	0.30838	-0.099	0.047	-5.02327	2.38479	-0.002	0.02614	1.32624	0.02132	1.08196	0.00396	0.20091	0.001	0.099	0.05074	5.02327	0.95694	0.134	0.87291
ctx-rh-medialorbitofrontal	2.47576	0.15173	2.49317	0.15342	0.01741	0.70091	0.05279	2.12493	0.0098	0.39459	-0.151	0.112	-6.07777	4.50802	0.013	0.03976	1.60029	0.03826	1.54005	0.00711	0.28598	0	0.151	0	6.07777	0.93583	0.08655	1.06272
ctx-rh-middletemporal	2.73879	0.17394	2.74214	0.17435	0.00334	0.12205	0.04753	1.73424	0.00883	0.32204	-0.106	0.101	-3.86795	3.68551	0.009	0.03741	1.36523	0.02865	1.04526	0.00532	0.1941	0.006	0.106	0.21893	3.86795	0.96384	0.70755	0.15025
ctx-rh-paracentral	2.52886	0.17152	2.52452	0.17962	-0.00434	-0.17196	0.03208	1.26967	0.00596	0.23577	-0.062	0.066	-2.4538	2.61211	-0.004	0.02497	0.98807	0.02008	0.79469	0.00373	0.14757	0.001	0.066	0.03957	2.61211	0.98358	0.47185	0.3262
ctx-rh-parahippocampal	2.55145	0.29955	2.56245	0.31047	0.011	0.4302	0.08259	3.22995	0.01534	0.59979	-0.158	0.223	-6.17924	8.72134	0.024	0.06376	2.49354	0.0523	2.04558	0.00971	0.37986	0.006	0.223	0.23466	8.72134	0.96395	0.47916	0.31952
ctx-rh-parsopercularis	2.70279	0.17115	2.69669	0.16595	-0.0061	-0.22607	0.03275	1.21298	0.00608	0.22524	-0.09	0.046	-3.33366	1.70387	0	0.02555	0.94645	0.02085	0.77233	0.00387	0.14342	0	0.09	0	3.33366	0.98113	0.32412	0.48929
ctx-rh-parsorbitalis	2.79021	0.18019	2.80103	0.17464	0.01083	0.38731	0.06572	2.35081	0.0122	0.43653	-0.101	0.249	-3.61279	8.90678	0.003	0.04483	1.60349	0.04857	1.73742	0.00902	0.32263	0.001	0.249	0.03578	8.90678	0.93189	0.38251	0.41735
ctx-rh-parstriangularis	2.60186	0.15362	2.61072	0.16183	0.00886	0.34003	0.04225	1.6212	0.00785	0.30105	-0.096	0.113	-3.68339	4.33567	0.006	0.03107	1.19207	0.02944	1.12971	0.00547	0.20978	0.002	0.113	0.07674	4.33567	0.96381	0.26828	0.57141
ctx-rh-pericalcarine	1.66941	0.12683	1.66645	0.12772	-0.00297	-0.1778	0.02912	1.74572	0.00541	0.32417	-0.078	0.073	-4.67646	4.37668	-0.003	0.02138	1.28179	0.01958	1.17414	0.00364	0.21803	0.002	0.078	0.11991	4.67646	0.97445	0.58772	0.23083
ctx-rh-postcentral	2.228	0.13123	2.227	0.12723	-0.001	-0.0449	0.03075	1.38027	0.00571	0.25631	-0.052	0.113	-2.33446	5.07295	-0.002	0.0199	0.89322	0.02316	1.03966	0.0043	0.19306	0	0.113	0	5.07295	0.97264	0.86221	0.06438
ctx-rh-posteriorcingulate	2.67507	0.16817	2.72662	0.16129	0.05155	1.90873	0.03826	1.41649	0.0071	0.26304	-0.047	0.146	-1.74019	5.40571	0.043	0.05479	2.02874	0.03327	1.23167	0.00618	0.22872	0.01	0.146	0.37025	5.40571	0.92678	0	7.22472
ctx-rh-precentral	2.61969	0.14469	2.61224	0.14721	-0.00745	-0.28472	0.02365	0.90413	0.00439	0.16789	-0.076	0.033	-2.90525	1.26148	-0.006	0.01814	0.69336	0.01662	0.63521	0.00309	0.11796	0	0.076	0	2.90525	0.98603	0.101	0.99566
ctx-rh-precuneus	2.49483	0.1731	2.49528	0.17114	0.00045	0.01797	0.03711	1.48725	0.00689	0.27617	-0.041	0.167	-1.64326	6.69325	-0.004	0.02148	0.86101	0.02999	1.20184	0.00557	0.22318	0.001	0.167	0.04008	6.69325	0.97755	0.94859	0.02292
ctx-rh-rostralanteriorcingulate	2.90959	0.24758	2.91497	0.25297	0.00538	0.18471	0.09551	3.27965	0.01774	0.60901	-0.149	0.289	-5.11628	9.92351	-0.013	0.07331	2.51729	0.05989	2.0563	0.01112	0.38185	0.007	0.289	0.24036	9.92351	0.92939	0.76391	0.11696
ctx-rh-rostralmiddlefrontal	2.47276	0.11693	2.47134	0.12413	-0.00141	-0.05719	0.02888	1.1682	0.00536	0.21693	-0.049	0.067	-1.98216	2.71031	-0.007	0.02321	0.93877	0.01668	0.67477	0.0031	0.1253	0.001	0.067	0.04045	2.71031	0.97223	0.79399	0.10019
ctx-rh-superiorfrontal	2.84079	0.15291	2.84528	0.15872	0.00448	0.15767	0.02984	1.04957	0.00554	0.1949	-0.056	0.086	-1.96973	3.02494	0	0.02131	0.74956	0.021	0.73853	0.0039	0.13714	0	0.086	0	3.02494	0.98188	0.42533	0.37127
ctx-rh-superiorparietal	2.40159	0.16697	2.3989	0.16889	-0.00269	-0.11206	0.02218	0.92406	0.00412	0.17159	-0.055	0.064	-2.29144	2.66639	-0.003	0.016	0.6666	0.01531	0.6377	0.00284	0.11842	0	0.064	0	2.66639	0.99145	0.51905	0.28479
ctx-rh-superiortemporal	2.82559	0.18492	2.83234	0.18363	0.00676	0.23891	0.03783	1.33721	0.00702	0.24831	-0.08	0.082	-2.82789	2.89858	0.006	0.02959	1.04583	0.02391	0.84523	0.00444	0.15696	0.004	0.082	0.1414	2.89858	0.97898	0.34423	0.46316
ctx-rh-supramarginal	2.66179	0.15399	2.66369	0.1592	0.0019	0.07123	0.023	0.86373	0.00427	0.16039	-0.049	0.047	-1.84021	1.7651	0.002	0.01721	0.64621	0.01503	0.56461	0.00279	0.10485	0	0.049	0	1.84021	0.98951	0.6604	0.18019
ctx-rh-temporalpole	3.64141	0.46523	3.61962	0.50213	-0.02179	-0.60028	0.20479	5.64086	0.03803	1.04748	-0.649	0.487	-17.8762	13.4141	0.002	0.13669	3.76502	0.15192	4.1846	0.02821	0.77706	0.002	0.649	0.05508	17.8762	0.91248	0.57117	0.24323
ctx-rh-transversetemporal	2.35666	0.22725	2.3361	0.22139	-0.02055	-0.87589	0.06073	2.58831	0.01128	0.48064	-0.154	0.104	-6.56331	4.43235	-0.019	0.04972	2.11919	0.03956	1.686	0.00735	0.31308	0.003	0.154	0.12786	6.56331	0.96048	0.0791	1.10183
v5.0.0
Struct	Mean1	sd1	Mean2	sd2	Mean diff	Mean diff %	sd Diff	sd Diff %	se Diff	se Diff %	min Diff	max Diff	min Diff %	max Diff %	median	Mean AbsDiff	Mean AbsDiff %	sd AbsDiff	sd AbsDiff %	se AbsDiff	se AbsDiff %	min AbsDiff	max AbsDiff	min AbsDiff %	max AbsDiff %	ICC(1,1)	p	-log10(p)
ctx-lh-bankssts	2.37059	0.13939	2.37086	0.15078	0.00028	0.01164	0.05456	2.30148	0.01013	0.42737	-0.156	0.111	-6.58026	4.68212	0.008	0.04186	1.76579	0.03409	1.43791	0.00633	0.26701	0	0.156	0	6.58026	0.93175	0.97847	0.00945
ctx-lh-caudalanteriorcingulate	2.70462	0.2079	2.69079	0.18907	-0.01383	-0.51257	0.06133	2.27328	0.01139	0.42214	-0.173	0.093	-6.41285	3.44737	0	0.04438	1.64508	0.04381	1.62388	0.00813	0.30155	0	0.173	0	6.41285	0.95161	0.2348	0.62929
ctx-lh-caudalmiddlefrontal	2.65138	0.13746	2.6511	0.14334	-0.00028	-0.0104	0.02588	0.97599	0.00481	0.18124	-0.049	0.045	-1.84819	1.69732	-0.004	0.02117	0.79859	0.01433	0.54052	0.00266	0.10037	0.001	0.049	0.03772	1.84819	0.9836	0.95463	0.02016
ctx-lh-cuneus	1.90462	0.10428	1.90634	0.11035	0.00172	0.09048	0.02185	1.14643	0.00406	0.21289	-0.042	0.036	-2.20417	1.88929	0.006	0.018	0.94464	0.01203	0.63132	0.00223	0.11723	0.002	0.042	0.10496	2.20417	0.97988	0.67406	0.1713
ctx-lh-entorhinal	3.21434	0.41461	3.23152	0.42466	0.01717	0.53282	0.10046	3.11702	0.01865	0.57882	-0.172	0.216	-5.33675	6.70197	0.004	0.08338	2.58706	0.05654	1.75439	0.0105	0.32578	0.003	0.216	0.09308	6.70197	0.9715	0.36516	0.43752
ctx-lh-frontalpole	2.87138	0.31658	2.8789	0.3379	0.00752	0.26146	0.10544	3.66716	0.01958	0.68098	-0.282	0.193	-9.80822	6.71272	-0.002	0.07766	2.70092	0.07021	2.44201	0.01304	0.45347	0.002	0.282	0.06957	9.80822	0.94963	0.70392	0.15248
ctx-lh-fusiform	2.50048	0.16636	2.49397	0.17808	-0.00652	-0.26098	0.05034	2.01572	0.00935	0.37431	-0.107	0.089	-4.28475	3.56396	0	0.03624	1.45127	0.03489	1.39724	0.00648	0.25946	0	0.107	0	4.28475	0.95807	0.49141	0.30856
ctx-lh-inferiorparietal	2.49766	0.12387	2.50421	0.12912	0.00655	0.26197	0.02793	1.11681	0.00519	0.20739	-0.037	0.073	-1.47946	2.91891	0.009	0.0229	0.91552	0.01678	0.67098	0.00312	0.1246	0	0.073	0	2.91891	0.97514	0.21693	0.66368
ctx-lh-inferiortemporal	2.58821	0.17026	2.58472	0.18354	-0.00348	-0.13465	0.05515	2.13209	0.01024	0.39592	-0.117	0.112	-4.52355	4.33023	0.005	0.04079	1.57718	0.03647	1.41005	0.00677	0.26184	0.001	0.117	0.03866	4.52355	0.95292	0.73632	0.13294
ctx-lh-insula	2.97338	0.1686	2.97555	0.18014	0.00217	0.07304	0.05588	1.87881	0.01038	0.34889	-0.102	0.128	-3.42919	4.30329	0.005	0.04169	1.40158	0.03644	1.22509	0.00677	0.22749	0.004	0.128	0.13448	4.30329	0.95035	0.8357	0.07795
ctx-lh-isthmuscingulate	2.52848	0.21645	2.53562	0.24083	0.00714	0.2819	0.06759	2.66921	0.01255	0.49566	-0.173	0.2	-6.83241	7.89873	0	0.04452	1.75815	0.05068	2.00138	0.00941	0.37165	0	0.2	0	7.89873	0.95743	0.57406	0.24104
ctx-lh-lateraloccipital	2.18741	0.08645	2.195	0.09059	0.00759	0.34621	0.03427	1.56419	0.00636	0.29046	-0.056	0.126	-2.55567	5.75025	0.006	0.02524	1.15194	0.02397	1.09384	0.00445	0.20312	0.001	0.126	0.04564	5.75025	0.92404	0.24329	0.61387
ctx-lh-lateralorbitofrontal	2.65531	0.14972	2.65828	0.15635	0.00297	0.11162	0.04261	1.60397	0.00791	0.29785	-0.084	0.096	-3.16171	3.61339	-0.003	0.0329	1.23821	0.02654	0.99886	0.00493	0.18548	0.002	0.096	0.07528	3.61339	0.96238	0.71066	0.14834
ctx-lh-lingual	1.93724	0.09377	1.94755	0.09686	0.01031	0.5308	0.03568	1.83702	0.00663	0.34113	-0.045	0.156	-2.31673	8.03131	0.007	0.02245	1.1557	0.02935	1.511	0.00545	0.28059	0.001	0.156	0.05149	8.03131	0.92664	0.13093	0.88296
ctx-lh-medialorbitofrontal	2.48269	0.12405	2.50293	0.14161	0.02024	0.81199	0.06042	2.42371	0.01122	0.45007	-0.081	0.171	-3.24935	6.85973	0.021	0.04879	1.95735	0.04011	1.6091	0.00745	0.2988	0.005	0.171	0.20058	6.85973	0.88944	0.08198	1.0863
ctx-lh-middletemporal	2.72631	0.14986	2.72803	0.1543	0.00172	0.06322	0.05065	1.85708	0.0094	0.34485	-0.071	0.114	-2.60343	4.18015	-0.003	0.0409	1.4996	0.02891	1.06009	0.00537	0.19685	0.001	0.114	0.03667	4.18015	0.94636	0.85586	0.0676
ctx-lh-paracentral	2.47228	0.12506	2.48162	0.13589	0.00934	0.37727	0.03516	1.41945	0.00653	0.26359	-0.051	0.095	-2.05899	3.83537	0.006	0.02872	1.15966	0.02173	0.87717	0.00403	0.16289	0.003	0.095	0.12112	3.83537	0.96247	0.16341	0.78672
ctx-lh-parahippocampal	2.59862	0.30651	2.59624	0.30437	-0.00238	-0.0916	0.07381	2.84178	0.01371	0.5277	-0.175	0.162	-6.73742	6.23694	0.008	0.0521	2.00596	0.05141	1.97909	0.00955	0.36751	0.001	0.175	0.0385	6.73742	0.97176	0.86344	0.06377
ctx-lh-parsopercularis	2.63138	0.14624	2.63655	0.14878	0.00517	0.19637	0.03512	1.33348	0.00652	0.24762	-0.083	0.091	-3.15115	3.45486	0.007	0.02738	1.03947	0.02202	0.83607	0.00409	0.15525	0.002	0.091	0.07593	3.45486	0.97201	0.43442	0.36209
ctx-lh-parsorbitalis	2.76134	0.21676	2.76093	0.21465	-0.00041	-0.01499	0.05662	2.05058	0.01051	0.38078	-0.083	0.17	-3.00601	6.15688	-0.004	0.04193	1.51861	0.03721	1.3478	0.00691	0.25028	0.001	0.17	0.03622	6.15688	0.96672	0.96889	0.01373
ctx-lh-parstriangularis	2.572	0.1899	2.57234	0.18801	0.00034	0.01341	0.04124	1.60325	0.00766	0.29772	-0.093	0.081	-3.61562	3.14909	-0.005	0.03241	1.26017	0.02475	0.9622	0.0046	0.17868	0	0.093	0	3.61562	0.977	0.9644	0.01574
ctx-lh-pericalcarine	1.67738	0.1134	1.68776	0.11314	0.01038	0.61687	0.03662	2.17626	0.0068	0.40412	-0.067	0.084	-3.982	4.99237	0.018	0.0321	1.908	0.01962	1.16609	0.00364	0.21654	0.007	0.084	0.41603	4.99237	0.94541	0.13812	0.85976
ctx-lh-postcentral	2.21059	0.14029	2.212	0.13381	0.00141	0.06393	0.01541	0.69687	0.00286	0.12941	-0.029	0.038	-1.31145	1.71845	0.002	0.0121	0.54735	0.00937	0.42377	0.00174	0.07869	0.002	0.038	0.09044	1.71845	0.99385	0.62512	0.20404
ctx-lh-posteriorcingulate	2.69	0.15416	2.69769	0.1584	0.00769	0.28545	0.03972	1.47433	0.00738	0.27378	-0.061	0.087	-2.26442	3.22959	-0.005	0.03286	1.2199	0.02281	0.8466	0.00424	0.15721	0	0.087	0	3.22959	0.96762	0.30603	0.51424
ctx-lh-precentral	2.61234	0.14952	2.60883	0.15601	-0.00352	-0.13473	0.02089	0.80034	0.00388	0.14862	-0.053	0.043	-2.03019	1.64714	-0.003	0.01593	0.61025	0.01366	0.52311	0.00254	0.09714	0	0.053	0	2.03019	0.99071	0.37238	0.42901
ctx-lh-precuneus	2.44193	0.17149	2.44476	0.17671	0.00283	0.11573	0.02361	0.96642	0.00438	0.17946	-0.032	0.062	-1.30967	2.5375	-0.005	0.01841	0.75363	0.01465	0.59967	0.00272	0.11136	0	0.062	0	2.5375	0.99099	0.52426	0.28045
ctx-lh-rostralanteriorcingulate	2.83669	0.22252	2.81169	0.19783	-0.025	-0.88521	0.07169	2.53835	0.01331	0.47136	-0.2	0.11	-7.08167	3.89492	-0.026	0.05955	2.10863	0.04597	1.62778	0.00854	0.30227	0.005	0.2	0.17704	7.08167	0.93714	0.07083	1.14976
ctx-lh-rostralmiddlefrontal	2.47031	0.12828	2.46838	0.12516	-0.00193	-0.0782	0.02558	1.03591	0.00475	0.19236	-0.06	0.042	-2.42979	1.70086	0	0.02007	0.81272	0.01553	0.62876	0.00288	0.11676	0	0.06	0	2.42979	0.98021	0.68745	0.16276
ctx-lh-superiorfrontal	2.86803	0.15917	2.86541	0.15875	-0.00262	-0.09142	0.02459	0.85773	0.00457	0.15928	-0.043	0.063	-1.49997	2.19763	-0.002	0.01876	0.65436	0.01572	0.54852	0.00292	0.10186	0.001	0.063	0.03489	2.19763	0.98831	0.57058	0.24368
ctx-lh-superiorparietal	2.35186	0.15719	2.35338	0.15298	0.00152	0.06449	0.02532	1.07632	0.0047	0.19987	-0.057	0.068	-2.42283	2.8904	0.003	0.01869	0.79442	0.01679	0.71353	0.00312	0.1325	0	0.068	0	2.8904	0.98708	0.74934	0.12532
ctx-lh-superiortemporal	2.80552	0.15327	2.79634	0.15083	-0.00917	-0.32748	0.03506	1.25173	0.00651	0.23244	-0.075	0.085	-2.67768	3.03471	-0.013	0.02848	1.0169	0.02182	0.77903	0.00405	0.14466	0.004	0.085	0.14281	3.03471	0.97253	0.16989	0.76984
ctx-lh-supramarginal	2.57193	0.14387	2.56914	0.14729	-0.00279	-0.10866	0.0287	1.11649	0.00533	0.20733	-0.066	0.064	-2.56756	2.48975	-0.002	0.0221	0.85988	0.01805	0.70212	0.00335	0.13038	0.001	0.066	0.0389	2.56756	0.98105	0.60434	0.21872
ctx-lh-temporalpole	3.59821	0.3018	3.61245	0.27802	0.01424	0.39501	0.12409	3.44193	0.02304	0.63915	-0.223	0.31	-6.18529	8.59838	0.031	0.09797	2.71724	0.07529	2.08839	0.01398	0.38781	0	0.31	0	8.59838	0.91041	0.54156	0.26636
ctx-lh-transversetemporal	2.34741	0.16773	2.35928	0.18909	0.01186	0.50405	0.09509	4.04052	0.01766	0.75031	-0.281	0.259	-11.9405	11.0056	0.006	0.06234	2.6492	0.07184	3.05288	0.01334	0.56691	0.002	0.281	0.08499	11.9405	0.86097	0.50722	0.2948
ctx-rh-bankssts	2.54497	0.18461	2.54724	0.17809	0.00228	0.08939	0.03369	1.3231	0.00626	0.24569	-0.087	0.06	-3.41698	2.35655	0.002	0.02579	1.01304	0.02124	0.83425	0.00394	0.15492	0.002	0.087	0.07855	3.41698	0.98326	0.71873	0.14343
ctx-rh-caudalanteriorcingulate	2.60276	0.20316	2.59734	0.19476	-0.00541	-0.20822	0.05946	2.28675	0.01104	0.42464	-0.141	0.138	-5.42297	5.30758	-0.013	0.04624	1.77848	0.03675	1.41357	0.00682	0.26249	0.009	0.141	0.34615	5.42297	0.95651	0.62771	0.20224
ctx-rh-caudalmiddlefrontal	2.64631	0.14695	2.64614	0.14464	-0.00017	-0.00651	0.02545	0.96176	0.00473	0.17859	-0.046	0.049	-1.73833	1.8517	0	0.021	0.79358	0.01382	0.52226	0.00257	0.09698	0	0.049	0	1.8517	0.98529	0.97116	0.01271
ctx-rh-cuneus	1.89983	0.1104	1.896	0.10586	-0.00383	-0.20167	0.03053	1.60867	0.00567	0.29872	-0.069	0.061	-3.63558	3.21405	0	0.02397	1.26273	0.01877	0.98919	0.00349	0.18369	0	0.069	0	3.63558	0.96089	0.50513	0.29659
ctx-rh-entorhinal	3.40097	0.42646	3.43131	0.47773	0.03034	0.88828	0.18598	5.44411	0.03454	1.01095	-0.38	0.457	-11.1237	13.3777	0.012	0.14145	4.14059	0.12174	3.56354	0.02261	0.66173	0.002	0.457	0.05854	13.3777	0.91629	0.38706	0.41222
ctx-rh-frontalpole	2.84366	0.26494	2.82517	0.27547	-0.01848	-0.65208	0.08494	2.9966	0.01577	0.55645	-0.258	0.104	-9.10241	3.66919	-0.011	0.06221	2.1947	0.05967	2.10505	0.01108	0.3909	0.001	0.258	0.03528	9.10241	0.94999	0.25113	0.6001
ctx-rh-fusiform	2.54717	0.17967	2.55269	0.18807	0.00552	0.21637	0.04844	1.89962	0.00899	0.35275	-0.11	0.119	-4.31384	4.66679	0.006	0.03724	1.46049	0.03068	1.20326	0.0057	0.22344	0.003	0.119	0.11765	4.66679	0.96605	0.54458	0.26394
ctx-rh-inferiorparietal	2.55159	0.13678	2.55166	0.13223	7e-05	0.0027	0.02431	0.95257	0.00451	0.17689	-0.066	0.034	-2.58659	1.33248	-0.001	0.01972	0.773	0.01371	0.53714	0.00255	0.09974	0	0.066	0	2.58659	0.98424	0.98792	0.00528
ctx-rh-inferiortemporal	2.60428	0.19614	2.6261	0.1855	0.02183	0.83465	0.05239	2.00345	0.00973	0.37203	-0.066	0.121	-2.52372	4.62681	0.01	0.04397	1.68116	0.03517	1.34466	0.00653	0.2497	0.001	0.121	0.03824	4.62681	0.95721	0.03296	1.48202
ctx-rh-insula	2.92607	0.15561	2.9261	0.14781	3e-05	0.00118	0.09641	3.29479	0.0179	0.61183	-0.296	0.193	-10.1159	6.59584	-0.013	0.07397	2.5278	0.06024	2.05857	0.01119	0.38227	0.004	0.296	0.13671	10.1159	0.8045	0.99848	0.00066
ctx-rh-isthmuscingulate	2.48476	0.23755	2.48179	0.23703	-0.00297	-0.11942	0.07082	2.8519	0.01315	0.52958	-0.136	0.187	-5.47664	7.53038	-0.015	0.05662	2.28008	0.04128	1.66242	0.00767	0.3087	0.005	0.187	0.20134	7.53038	0.95689	0.82323	0.08448
ctx-rh-lateraloccipital	2.26107	0.10966	2.2591	0.10951	-0.00197	-0.08697	0.02548	1.12741	0.00473	0.20935	-0.041	0.047	-1.8141	2.07956	-0.011	0.02224	0.98409	0.01187	0.52522	0.0022	0.09753	0.001	0.047	0.04424	2.07956	0.97373	0.68101	0.16685
ctx-rh-lateralorbitofrontal	2.56745	0.14833	2.57097	0.14894	0.00352	0.1369	0.04599	1.78994	0.00854	0.33238	-0.094	0.074	-3.65871	2.88027	0.011	0.03828	1.48979	0.0247	0.96153	0.00459	0.17855	0.006	0.094	0.23353	3.65871	0.95348	0.68357	0.16522
ctx-rh-lingual	1.95379	0.08737	1.95879	0.0867	0.005	0.25559	0.03011	1.53934	0.00559	0.28585	-0.045	0.076	-2.30027	3.8849	0	0.02307	1.17922	0.01953	0.99851	0.00363	0.18542	0	0.076	0	3.8849	0.94054	0.37888	0.4215
ctx-rh-medialorbitofrontal	2.45879	0.1481	2.45228	0.15073	-0.00652	-0.26541	0.04746	1.93288	0.00881	0.35893	-0.128	0.06	-5.21272	2.44346	0	0.03521	1.43378	0.03183	1.29609	0.00591	0.24068	0	0.128	0	5.21272	0.95032	0.46578	0.33182
ctx-rh-middletemporal	2.74607	0.15652	2.74224	0.1536	-0.00383	-0.13948	0.03533	1.28732	0.00656	0.23905	-0.077	0.089	-2.80596	3.24326	0	0.02762	1.00653	0.02175	0.79251	0.00404	0.14716	0	0.089	0	3.24326	0.97463	0.56424	0.24854
ctx-rh-paracentral	2.51441	0.1634	2.52241	0.16608	0.008	0.31766	0.04168	1.65501	0.00774	0.30733	-0.115	0.095	-4.56637	3.77221	0.004	0.02966	1.17753	0.02988	1.18636	0.00555	0.2203	0.001	0.115	0.0397	4.56637	0.96792	0.31016	0.50842
ctx-rh-parahippocampal	2.54579	0.28854	2.55152	0.28569	0.00572	0.22459	0.09244	3.62699	0.01717	0.67352	-0.196	0.199	-7.69033	7.80804	0.015	0.07648	3.00091	0.0502	1.96984	0.00932	0.36579	0.015	0.199	0.58854	7.80804	0.94972	0.74127	0.13003
ctx-rh-parsopercularis	2.66424	0.17999	2.66369	0.17541	-0.00055	-0.02071	0.0329	1.23503	0.00611	0.22934	-0.068	0.052	-2.55259	1.95198	0.004	0.02766	1.03812	0.01705	0.63998	0.00317	0.11884	0.001	0.068	0.03754	2.55259	0.98344	0.92869	0.03213
ctx-rh-parsorbitalis	2.77603	0.18991	2.75879	0.2031	-0.01724	-0.62302	0.04423	1.5984	0.00821	0.29682	-0.081	0.097	-2.92692	3.50507	-0.027	0.03834	1.38558	0.02723	0.98412	0.00506	0.18275	0.005	0.097	0.18068	3.50507	0.97176	0.04496	1.34719
ctx-rh-parstriangularis	2.56703	0.14608	2.56752	0.15075	0.00048	0.01881	0.03338	1.30031	0.0062	0.24146	-0.063	0.068	-2.45396	2.64872	-0.004	0.02724	1.0611	0.0186	0.72459	0.00345	0.13455	0.002	0.068	0.0779	2.64872	0.97557	0.93847	0.02758
ctx-rh-pericalcarine	1.649	0.07873	1.65766	0.09003	0.00866	0.5235	0.04354	2.63333	0.00808	0.489	-0.08	0.145	-4.83873	8.77019	0.01	0.03224	1.95009	0.02994	1.81097	0.00556	0.33629	0	0.145	0	8.77019	0.86686	0.29351	0.53238
ctx-rh-postcentral	2.19952	0.11338	2.19997	0.11537	0.00045	0.02038	0.01936	0.87996	0.00359	0.1634	-0.056	0.035	-2.54575	1.5911	0.002	0.01521	0.6913	0.01164	0.52895	0.00216	0.09822	0	0.056	0	2.54575	0.98616	0.90164	0.04497
ctx-rh-posteriorcingulate	2.62707	0.16657	2.631	0.1719	0.00393	0.14952	0.04312	1.64019	0.00801	0.30457	-0.093	0.068	-3.53743	2.5865	0.006	0.03497	1.32998	0.02468	0.93881	0.00458	0.17433	0.001	0.093	0.03803	3.53743	0.96838	0.62731	0.20252
ctx-rh-precentral	2.5999	0.14579	2.60193	0.14516	0.00203	0.07822	0.01902	0.73113	0.00353	0.13577	-0.048	0.035	-1.84551	1.34568	0	0.01507	0.57937	0.01143	0.43957	0.00212	0.08163	0	0.048	0	1.84551	0.99165	0.56912	0.2448
ctx-rh-precuneus	2.47431	0.16483	2.47738	0.16725	0.00307	0.12396	0.02167	0.87537	0.00402	0.16255	-0.039	0.036	-1.57522	1.45405	0.002	0.01741	0.70335	0.01286	0.51944	0.00239	0.09646	0.001	0.039	0.04039	1.57522	0.9916	0.4521	0.34476
ctx-rh-rostralanteriorcingulate	2.79772	0.22856	2.80234	0.24134	0.00462	0.16502	0.08103	2.89395	0.01505	0.53739	-0.149	0.186	-5.32136	6.64278	0.005	0.0629	2.24628	0.04991	1.78246	0.00927	0.33099	0.001	0.186	0.03571	6.64278	0.94237	0.76105	0.11858
ctx-rh-rostralmiddlefrontal	2.43793	0.10705	2.43614	0.11016	-0.00179	-0.07358	0.02542	1.04289	0.00472	0.19366	-0.056	0.043	-2.29787	1.76444	-0.002	0.02	0.82067	0.01533	0.62903	0.00285	0.11681	0	0.056	0	2.29787	0.97342	0.70686	0.15067
ctx-rh-superiorfrontal	2.81679	0.15685	2.80759	0.1554	-0.00921	-0.32739	0.03349	1.19105	0.00622	0.22117	-0.1	0.066	-3.55594	2.34693	-0.016	0.02776	0.98708	0.02029	0.72144	0.00377	0.13397	0.002	0.1	0.07112	3.55594	0.97605	0.14997	0.82399
ctx-rh-superiorparietal	2.37079	0.16103	2.37031	0.15515	-0.00048	-0.02036	0.01834	0.77355	0.00341	0.14364	-0.034	0.046	-1.43426	1.94048	-0.002	0.01372	0.57894	0.01189	0.50166	0.00221	0.09316	0.001	0.046	0.04218	1.94048	0.9935	0.88828	0.05145
ctx-rh-superiortemporal	2.83331	0.18762	2.82869	0.1819	-0.00462	-0.16322	0.02981	1.05284	0.00553	0.19551	-0.062	0.072	-2.19004	2.54327	-0.004	0.02352	0.83071	0.01838	0.64911	0.00341	0.12054	0	0.072	0	2.54327	0.98713	0.41087	0.38629
ctx-rh-supramarginal	2.64024	0.1544	2.64166	0.15418	0.00141	0.05353	0.02831	1.07207	0.00526	0.19908	-0.041	0.066	-1.55248	2.4991	-0.005	0.02238	0.8474	0.01688	0.63919	0.00313	0.11869	0	0.066	0	2.4991	0.9837	0.78997	0.10239
ctx-rh-temporalpole	3.69769	0.30875	3.70072	0.32282	0.00303	0.08203	0.13363	3.61243	0.02481	0.67081	-0.304	0.395	-8.21798	10.678	0.028	0.08793	2.37702	0.09929	2.68414	0.01844	0.49843	0.001	0.395	0.02703	10.678	0.91342	0.90355	0.04405
ctx-rh-transversetemporal	2.38545	0.25319	2.40762	0.24812	0.02217	0.92519	0.09235	3.85343	0.01715	0.71556	-0.102	0.339	-4.25615	14.1454	-0.001	0.06507	2.71513	0.06821	2.84609	0.01267	0.52851	0.001	0.339	0.04172	14.1454	0.93062	0.2066	0.68488

## Sheet: Between-version Mac
v4.3.1 vs. v4.5.0
Struct	Mean1	sd1	Mean2	sd2	Mean diff	Mean diff %	sd Diff	sd Diff %	se Diff	se Diff %	min Diff	max Diff	min Diff %	max Diff %	median	Mean AbsDiff	Mean AbsDiff %	sd AbsDiff	sd AbsDiff %	se AbsDiff	se AbsDiff %	min AbsDiff	max AbsDiff	min AbsDiff %	max AbsDiff %	ICC	p	-log10(p)
ctx-lh-bankssts	2.39793	0.12824	2.39533	0.14534	-0.0026	-0.10849	0.0513	2.14059	0.00937	0.39082	-0.096	0.102	-4.00562	4.25597	0	0.0346	1.44369	0.03742	1.56147	0.00683	0.28508	0	0.102	0	4.25597	0.93203	0.7833	0.106072
ctx-lh-caudalanteriorcingulate	2.73047	0.21417	2.72293	0.21883	-0.00753	-0.27628	0.06008	2.20322	0.01097	0.40225	-0.178	0.114	-6.52804	4.18088	0	0.0418	1.53299	0.04313	1.58178	0.00787	0.28879	0	0.178	0	6.52804	0.96217	0.49764	0.303085
ctx-lh-caudalmiddlefrontal	2.68317	0.14208	2.68383	0.14526	0.00067	0.02484	0.02149	0.80094	0.00392	0.14623	-0.049	0.053	-1.82597	1.97503	0	0.01433	0.53413	0.01581	0.58907	0.00289	0.10755	0	0.053	0	1.97503	0.98917	0.86627	0.062343
ctx-lh-cuneus	1.923	0.11583	1.92567	0.12096	0.00267	0.13858	0.04561	2.37038	0.00833	0.43277	-0.089	0.173	-4.62498	8.99012	0	0.02633	1.36844	0.03702	1.9239	0.00676	0.35125	0	0.173	0	8.99012	0.92796	0.75111	0.124299
ctx-lh-entorhinal	3.22487	0.39566	3.23827	0.40368	0.0134	0.41466	0.13273	4.10727	0.02423	0.74988	-0.317	0.335	-9.80948	10.3665	0.0095	0.09327	2.88611	0.09383	2.90356	0.01713	0.53011	0	0.335	0	10.3665	0.9461	0.58452	0.233199
ctx-lh-frontalpole	2.88957	0.26723	2.905	0.30094	0.01543	0.53268	0.07895	2.72505	0.01441	0.49752	-0.198	0.203	-6.83399	7.00657	0	0.05197	1.79363	0.06071	2.09556	0.01108	0.3826	0	0.203	0	7.00657	0.96133	0.29315	0.53291
ctx-lh-fusiform	2.5186	0.2002	2.5114	0.19561	-0.0072	-0.28628	0.04331	1.72187	0.00791	0.31437	-0.082	0.09	-3.26044	3.57853	0	0.03093	1.22995	0.03064	1.21848	0.00559	0.22246	0	0.09	0	3.57853	0.9762	0.36999	0.431815
ctx-lh-inferiorparietal	2.52543	0.13714	2.52147	0.13781	-0.00397	-0.15719	0.02028	0.80366	0.0037	0.14673	-0.059	0.044	-2.33807	1.74364	0	0.01217	0.48214	0.01657	0.65647	0.00302	0.11985	0	0.059	0	2.33807	0.98907	0.29286	0.533344
ctx-lh-inferiortemporal	2.53933	0.19628	2.53387	0.1857	-0.00547	-0.21551	0.05471	2.15686	0.00999	0.39379	-0.166	0.144	-6.54419	5.67689	0	0.0326	1.28518	0.04387	1.72958	0.00801	0.31578	0	0.166	0	6.54419	0.95994	0.58837	0.230345
ctx-lh-insula	3.0332	0.15692	3.03813	0.17636	0.00493	0.16251	0.04726	1.55692	0.00863	0.28425	-0.106	0.119	-3.49182	3.92007	0	0.03153	1.03876	0.03508	1.15546	0.0064	0.21096	0	0.119	0	3.92007	0.9608	0.57192	0.242666
ctx-lh-isthmuscingulate	2.71	0.20307	2.70057	0.20554	-0.00943	-0.3487	0.04549	1.68136	0.0083	0.30697	-0.126	0.11	-4.65755	4.06612	0	0.03077	1.13728	0.03438	1.27073	0.00628	0.232	0	0.126	0	4.65755	0.97498	0.26529	0.576283
ctx-lh-lateraloccipital	2.20197	0.10003	2.195	0.09766	-0.00697	-0.31689	0.03425	1.55803	0.00625	0.28446	-0.1	0.076	-4.54859	3.45693	0	0.02123	0.96582	0.02752	1.25155	0.00502	0.2285	0	0.1	0	4.54859	0.9395	0.27443	0.561573
ctx-lh-lateralorbitofrontal	2.6841	0.16189	2.67957	0.16294	-0.00453	-0.16904	0.03219	1.20041	0.00588	0.21916	-0.1	0.078	-3.7288	2.90846	0	0.02087	0.77807	0.02464	0.91885	0.0045	0.16776	0	0.1	0	3.7288	0.98062	0.44678	0.349911
ctx-lh-lingual	1.96853	0.10281	1.96713	0.10232	-0.0014	-0.07114	0.02899	1.47341	0.00529	0.26901	-0.087	0.072	-4.42111	3.65885	0	0.01867	0.94859	0.02196	1.11594	0.00401	0.20374	0	0.087	0	4.42111	0.96126	0.79329	0.10057
ctx-lh-medialorbitofrontal	2.54003	0.16721	2.53433	0.17117	-0.0057	-0.22466	0.04042	1.59315	0.00738	0.29087	-0.113	0.101	-4.45375	3.9808	0	0.02703	1.06549	0.03019	1.18993	0.00551	0.21725	0	0.113	0	4.45375	0.97184	0.44614	0.350523
ctx-lh-middletemporal	2.71963	0.1524	2.7209	0.16426	0.00127	0.04656	0.04747	1.74496	0.00867	0.31858	-0.114	0.145	-4.19076	5.33036	0	0.02993	1.10038	0.03644	1.3396	0.00665	0.24458	0	0.145	0	5.33036	0.95655	0.88481	0.0531533
ctx-lh-paracentral	2.4721	0.1306	2.4689	0.13154	-0.0032	-0.12953	0.03198	1.29456	0.00584	0.23635	-0.111	0.066	-4.49302	2.67152	0	0.01927	0.77987	0.02548	1.03154	0.00465	0.18833	0	0.111	0	4.49302	0.97091	0.58787	0.230719
ctx-lh-parahippocampal	2.60533	0.30526	2.61093	0.31388	0.0056	0.21471	0.10709	4.10612	0.01955	0.74967	-0.248	0.23	-9.50871	8.81857	0	0.06987	2.6788	0.08032	3.07969	0.01466	0.56227	0	0.248	0	9.50871	0.94195	0.7766	0.109803
ctx-lh-parsopercularis	2.64603	0.14508	2.64953	0.15376	0.0035	0.13219	0.02568	0.97005	0.00469	0.17711	-0.05	0.079	-1.88837	2.98363	0	0.01603	0.60554	0.02016	0.76141	0.00368	0.13901	0	0.079	0	2.98363	0.98545	0.46146	0.33587
ctx-lh-parsorbitalis	2.7631	0.25609	2.77017	0.25714	0.00707	0.25542	0.05078	1.83532	0.00927	0.33508	-0.125	0.123	-4.51813	4.44584	0	0.032	1.15664	0.03963	1.43247	0.00724	0.26153	0	0.125	0	4.51813	0.98069	0.45205	0.344812
ctx-lh-parstriangularis	2.56437	0.19189	2.57783	0.19613	0.01347	0.52377	0.03915	1.52281	0.00715	0.27803	-0.1	0.093	-3.88938	3.61714	0.0005	0.02833	1.10199	0.02983	1.16038	0.00545	0.21185	0	0.1	0	3.88938	0.97793	0.06964	1.15714
ctx-lh-pericalcarine	1.69817	0.13036	1.69473	0.13356	-0.00343	-0.20238	0.03193	1.88195	0.00583	0.34359	-0.077	0.048	-4.53889	2.82944	0	0.02203	1.29879	0.02301	1.35612	0.0042	0.24759	0	0.077	0	4.53889	0.97136	0.56041	0.251496
ctx-lh-postcentral	2.23627	0.13174	2.2375	0.13542	0.00123	0.05514	0.01431	0.63967	0.00261	0.11679	-0.053	0.034	-2.36937	1.51997	0	0.00837	0.37403	0.01157	0.5173	0.00211	0.09444	0	0.053	0	2.36937	0.99441	0.64038	0.193561
ctx-lh-posteriorcingulate	2.72483	0.14321	2.72023	0.15645	-0.0046	-0.16896	0.03371	1.23831	0.00616	0.22608	-0.106	0.07	-3.89343	2.57114	0	0.02093	0.76889	0.02656	0.97538	0.00485	0.17808	0	0.106	0	3.89343	0.9751	0.46088	0.336413
ctx-lh-precentral	2.62877	0.12451	2.62587	0.12921	-0.0029	-0.11038	0.01848	0.70355	0.00337	0.12845	-0.053	0.032	-2.01727	1.21798	0	0.0119	0.45293	0.01428	0.54348	0.00261	0.09922	0	0.053	0	2.01727	0.98948	0.39722	0.400967
ctx-lh-precuneus	2.46613	0.17017	2.46313	0.17016	-0.003	-0.12172	0.02383	0.96687	0.00435	0.17653	-0.071	0.038	-2.88075	1.54182	0	0.01607	0.65189	0.01761	0.71453	0.00322	0.13046	0	0.071	0	2.88075	0.99037	0.49597	0.304545
ctx-lh-rostralanteriorcingulate	2.90243	0.21554	2.89307	0.21936	-0.00937	-0.32324	0.06286	2.16935	0.01148	0.39607	-0.151	0.106	-5.21094	3.65801	0	0.0439	1.51497	0.04526	1.56202	0.00826	0.28518	0	0.151	0	5.21094	0.95867	0.42108	0.37563
ctx-lh-rostralmiddlefrontal	2.49107	0.1264	2.48913	0.13354	-0.00193	-0.07764	0.02518	1.01117	0.0046	0.18461	-0.059	0.05	-2.36938	2.00795	0	0.01633	0.65593	0.01902	0.76396	0.00347	0.13948	0	0.059	0	2.36938	0.98176	0.67718	0.169297
ctx-lh-superiorfrontal	2.88453	0.15054	2.88143	0.16305	-0.0031	-0.10753	0.02602	0.90246	0.00475	0.16477	-0.058	0.069	-2.0118	2.39335	0	0.01863	0.64632	0.0181	0.6279	0.0033	0.11464	0	0.069	0	2.39335	0.98652	0.51915	0.284706
ctx-lh-superiorparietal	2.384	0.14873	2.38533	0.15325	0.00133	0.05591	0.01936	0.81182	0.00353	0.14822	-0.04	0.041	-1.67739	1.71932	0	0.01307	0.54795	0.01414	0.59304	0.00258	0.10827	0	0.041	0	1.71932	0.99202	0.70874	0.14951
ctx-lh-superiortemporal	2.793	0.16971	2.7956	0.17093	0.0026	0.09305	0.02839	1.01607	0.00518	0.18551	-0.051	0.098	-1.82515	3.50714	0	0.018	0.64417	0.02186	0.78237	0.00399	0.14284	0	0.098	0	3.50714	0.98645	0.61975	0.20778
ctx-lh-supramarginal	2.5849	0.14599	2.5805	0.14821	-0.0044	-0.17036	0.02021	0.78266	0.00369	0.14289	-0.046	0.035	-1.78108	1.35517	0	0.0152	0.58853	0.01377	0.53316	0.00251	0.09734	0	0.046	0	1.78108	0.99043	0.24283	0.6147
ctx-lh-temporalpole	3.592	0.33469	3.54987	0.34105	-0.04213	-1.1799	0.09882	2.76742	0.01804	0.50526	-0.294	0.156	-8.23315	4.36861	-0.0035	0.06293	1.76238	0.08663	2.42604	0.01582	0.44293	0	0.294	0	8.23315	0.95104	0.02666	1.57417
ctx-lh-transversetemporal	2.32333	0.18867	2.32577	0.16841	0.00243	0.10468	0.04573	1.96722	0.00835	0.35916	-0.084	0.151	-3.6136	6.49588	0	0.0291	1.25186	0.03495	1.50337	0.00638	0.27448	0	0.151	0	6.49588	0.96829	0.77278	0.111944
ctx-rh-bankssts	2.5256	0.18212	2.5322	0.17703	0.0066	0.26098	0.04182	1.65363	0.00764	0.30191	-0.109	0.077	-4.31017	3.0448	0	0.0294	1.16256	0.02999	1.18609	0.00548	0.21655	0	0.109	0	4.31017	0.97311	0.39444	0.404015
ctx-rh-caudalanteriorcingulate	2.64137	0.22379	2.6483	0.2303	0.00693	0.26215	0.04473	1.69127	0.00817	0.30878	-0.099	0.109	-3.74315	4.12124	0	0.03113	1.17714	0.03237	1.22395	0.00591	0.22346	0	0.109	0	4.12124	0.98078	0.40285	0.394852
ctx-rh-caudalmiddlefrontal	2.6802	0.14837	2.67347	0.1532	-0.00673	-0.25154	0.019	0.70989	0.00347	0.12961	-0.044	0.04	-1.64373	1.49431	-0.0005	0.01373	0.51304	0.01459	0.54508	0.00266	0.09952	0	0.044	0	1.64373	0.99133	0.06206	1.20719
ctx-rh-cuneus	1.92373	0.12186	1.92453	0.12126	0.0008	0.04158	0.03201	1.66372	0.00584	0.30375	-0.091	0.06	-4.72941	3.11828	0	0.02267	1.17802	0.02223	1.15507	0.00406	0.21089	0	0.091	0	4.72941	0.96644	0.89207	0.0496008
ctx-rh-entorhinal	3.40353	0.46348	3.39563	0.51548	-0.0079	-0.23238	0.12504	3.67808	0.02283	0.67152	-0.319	0.271	-9.3835	7.97156	0	0.08257	2.42873	0.09299	2.73533	0.01698	0.4994	0	0.319	0	9.3835	0.9684	0.7318	0.135604
ctx-rh-frontalpole	2.85553	0.28946	2.88443	0.2955	0.0289	1.00698	0.07429	2.58861	0.01356	0.47261	-0.101	0.228	-3.51918	7.9443	0.0065	0.05037	1.75495	0.06131	2.13631	0.01119	0.39004	0	0.228	0	7.9443	0.96401	0.04172	1.37961
ctx-rh-fusiform	2.5799	0.21743	2.5838	0.22118	0.0039	0.15105	0.06184	2.39524	0.01129	0.43731	-0.107	0.203	-4.14431	7.86258	0	0.03797	1.47052	0.04847	1.87717	0.00885	0.34272	0	0.203	0	7.86258	0.96139	0.73227	0.135326
ctx-rh-inferiorparietal	2.5673	0.15291	2.5667	0.15734	-0.0006	-0.02337	0.02296	0.89424	0.00419	0.16326	-0.064	0.034	-2.49318	1.3245	0.003	0.0152	0.59213	0.01698	0.66145	0.0031	0.12076	0	0.064	0	2.49318	0.98941	0.88715	0.0520024
ctx-rh-inferiortemporal	2.60563	0.22822	2.60243	0.23284	-0.0032	-0.12289	0.04581	1.75917	0.00836	0.32118	-0.072	0.148	-2.76494	5.68349	0	0.03027	1.1623	0.03408	1.30874	0.00622	0.23894	0	0.148	0	5.68349	0.98081	0.7048	0.151934
ctx-rh-insula	3.02187	0.16186	3.0208	0.16283	-0.00107	-0.0353	0.03448	1.14126	0.0063	0.20836	-0.098	0.076	-3.2436	2.51544	0	0.02213	0.73257	0.02614	0.86522	0.00477	0.15797	0	0.098	0	3.2436	0.97817	0.86663	0.0621649
ctx-rh-isthmuscingulate	2.6382	0.22088	2.657	0.21481	0.0188	0.71008	0.07025	2.65337	0.01283	0.48444	-0.094	0.275	-3.55038	10.3868	0	0.0428	1.61656	0.05836	2.20422	0.01065	0.40243	0	0.275	0	10.3868	0.94608	0.15347	0.813985
ctx-rh-lateraloccipital	2.26463	0.12091	2.26307	0.1282	-0.00157	-0.0692	0.03263	1.44127	0.00596	0.26314	-0.093	0.072	-4.10804	3.18042	0	0.02243	0.99094	0.02338	1.03266	0.00427	0.18854	0	0.093	0	4.10804	0.96676	0.79442	0.0999529
ctx-rh-lateralorbitofrontal	2.64047	0.16422	2.6423	0.16486	0.00183	0.06941	0.03729	1.4118	0.00681	0.25776	-0.079	0.082	-2.99087	3.10443	0	0.02423	0.91745	0.02805	1.06181	0.00512	0.19386	0	0.082	0	3.10443	0.9751	0.78962	0.10258
ctx-rh-lingual	1.9641	0.10408	1.96603	0.10796	0.00193	0.09839	0.02202	1.12075	0.00402	0.20462	-0.039	0.051	-1.98467	2.59533	0	0.0164	0.83458	0.01451	0.73861	0.00265	0.13485	0	0.051	0	2.59533	0.97898	0.63425	0.197739
ctx-rh-medialorbitofrontal	2.48083	0.15602	2.4853	0.1568	0.00447	0.17989	0.04419	1.77955	0.00807	0.3249	-0.063	0.139	-2.53719	5.59791	0	0.03127	1.2592	0.03101	1.24901	0.00566	0.22804	0	0.139	0	5.59791	0.961	0.58405	0.233546
ctx-rh-middletemporal	2.74257	0.17064	2.74193	0.17133	-0.00063	-0.0231	0.03486	1.27132	0.00637	0.23211	-0.082	0.069	-2.99025	2.51618	0	0.0225	0.82049	0.02631	0.95937	0.0048	0.17516	0	0.082	0	2.99025	0.97989	0.92143	0.0355383
ctx-rh-paracentral	2.5127	0.18991	2.50917	0.1955	-0.00353	-0.14072	0.02405	0.95775	0.00439	0.17486	-0.063	0.04	-2.50904	1.59303	0	0.01627	0.64783	0.01782	0.70965	0.00325	0.12956	0	0.063	0	2.50904	0.99231	0.42751	0.36905
ctx-rh-parahippocampal	2.58243	0.31725	2.56767	0.3064	-0.01477	-0.57345	0.04583	1.77986	0.00837	0.32496	-0.144	0.069	-5.59212	2.67956	-0.002	0.03257	1.2647	0.03506	1.36142	0.0064	0.24856	0	0.144	0	5.59212	0.98844	0.08814	1.05481
ctx-rh-parsopercularis	2.69387	0.16982	2.69163	0.1654	-0.00223	-0.08294	0.02495	0.92643	0.00455	0.16914	-0.064	0.055	-2.37676	2.04252	0	0.01783	0.66227	0.01728	0.64161	0.00315	0.11714	0	0.064	0	2.37676	0.9892	0.62758	0.202333
ctx-rh-parsorbitalis	2.78883	0.19876	2.78607	0.19018	-0.00277	-0.09926	0.0527	1.89055	0.00962	0.34516	-0.105	0.164	-3.76688	5.88351	0	0.03337	1.19703	0.04041	1.44985	0.00738	0.2647	0	0.164	0	5.88351	0.9644	0.77573	0.110289
ctx-rh-parstriangularis	2.60363	0.16825	2.60193	0.16614	-0.0017	-0.06531	0.03834	1.4731	0.007	0.26895	-0.135	0.099	-5.18675	3.80362	0	0.02257	0.86702	0.03076	1.18186	0.00562	0.21578	0	0.135	0	5.18675	0.97452	0.80983	0.0916057
ctx-rh-pericalcarine	1.6773	0.11921	1.6646	0.1259	-0.0127	-0.76005	0.02459	1.47157	0.00449	0.26867	-0.056	0.027	-3.35139	1.61585	0	0.01923	1.15104	0.01972	1.18006	0.0036	0.21545	0	0.056	0	3.35139	0.97525	0.00839	2.07638
ctx-rh-postcentral	2.22073	0.12986	2.2195	0.13159	-0.00123	-0.05555	0.01595	0.71822	0.00291	0.13113	-0.037	0.029	-1.66658	1.30624	0	0.0109	0.49096	0.01153	0.5193	0.0021	0.09481	0	0.037	0	1.66658	0.99276	0.67495	0.17073
ctx-rh-posteriorcingulate	2.72237	0.15994	2.72247	0.16011	0.0001	0.00367	0.0242	0.889	0.00442	0.16231	-0.048	0.052	-1.76314	1.91007	0	0.0167	0.61343	0.01724	0.6333	0.00315	0.11562	0	0.052	0	1.91007	0.98894	0.98211	0.00784336
ctx-rh-precentral	2.62107	0.13749	2.61077	0.14487	-0.0103	-0.39374	0.02826	1.0805	0.00516	0.19727	-0.119	0.024	-4.54908	0.91747	0	0.01703	0.65114	0.02467	0.943	0.0045	0.17217	0	0.119	0	4.54908	0.978	0.05541	1.25644
ctx-rh-precuneus	2.4928	0.17121	2.4896	0.17101	-0.0032	-0.12845	0.02255	0.90519	0.00412	0.16526	-0.042	0.058	-1.68594	2.3282	0	0.01533	0.6155	0.01661	0.66674	0.00303	0.12173	0	0.058	0	2.3282	0.99143	0.44331	0.353294
ctx-rh-rostralanteriorcingulate	2.9221	0.25164	2.91747	0.24895	-0.00463	-0.15869	0.07712	2.64117	0.01408	0.48221	-0.265	0.18	-9.07601	6.16484	0	0.04583	1.56975	0.06161	2.11015	0.01125	0.38526	0	0.265	0	9.07601	0.95392	0.74446	0.12816
ctx-rh-rostralmiddlefrontal	2.47173	0.11858	2.46667	0.12464	-0.00507	-0.20519	0.02507	1.01545	0.00458	0.1854	-0.094	0.042	-3.8069	1.70096	0	0.0152	0.61558	0.0204	0.82625	0.00372	0.15085	0	0.094	0	3.8069	0.9786	0.27748	0.556766
ctx-rh-superiorfrontal	2.84037	0.15358	2.84307	0.15643	0.0027	0.09501	0.02061	0.72532	0.00376	0.13242	-0.047	0.043	-1.65393	1.51317	0.001	0.0145	0.51025	0.01466	0.51584	0.00268	0.09418	0	0.047	0	1.65393	0.9913	0.47881	0.319836
ctx-rh-superiorparietal	2.39553	0.16873	2.3927	0.16939	-0.00283	-0.11835	0.01666	0.69583	0.00304	0.12704	-0.05	0.052	-2.08846	2.17198	0	0.00977	0.40794	0.01368	0.57141	0.0025	0.10433	0	0.052	0	2.17198	0.99517	0.35926	0.444596
ctx-rh-superiortemporal	2.82023	0.1909	2.82157	0.18985	0.00133	0.04727	0.02469	0.87521	0.00451	0.15979	-0.071	0.055	-2.51693	1.94973	0.0005	0.015	0.53175	0.01946	0.68979	0.00355	0.12594	0	0.071	0	2.51693	0.99185	0.76949	0.113794
ctx-rh-supramarginal	2.64917	0.16156	2.65373	0.16567	0.00457	0.17223	0.02326	0.87736	0.00425	0.16018	-0.059	0.058	-2.2252	2.18749	0	0.01523	0.57453	0.01796	0.67748	0.00328	0.12369	0	0.059	0	2.2252	0.98984	0.29114	0.535902
ctx-rh-temporalpole	3.6282	0.47642	3.59997	0.505	-0.02823	-0.7812	0.13949	3.85967	0.02547	0.70468	-0.52	0.161	-14.3882	4.4548	0	0.07757	2.14623	0.11857	3.28074	0.02165	0.59898	0	0.52	0	14.3882	0.95933	0.27671	0.557969
ctx-rh-transversetemporal	2.33107	0.23325	2.32667	0.2236	-0.0044	-0.18893	0.0578	2.48185	0.01055	0.45312	-0.19	0.112	-8.15848	4.80921	0	0.0364	1.56299	0.04461	1.91555	0.00814	0.34973	0	0.19	0	8.15848	0.96887	0.67978	0.167633
v4.3.1 vs. v5.0.0
Struct	Mean1	sd1	Mean2	sd2	Mean diff	Mean diff %	sd Diff	sd Diff %	se Diff	se Diff %	min Diff	max Diff	min Diff %	max Diff %	median	Mean AbsDiff	Mean AbsDiff %	sd AbsDiff	sd AbsDiff %	se AbsDiff	se AbsDiff %	min AbsDiff	max AbsDiff	min AbsDiff %	max AbsDiff %	ICC(1,1)	p	-log10(p)
ctx-lh-bankssts	2.39793	0.12824	2.36507	0.15152	-0.03287	-1.38008	0.08372	3.51541	0.01529	0.64182	-0.209	0.107	-8.77598	4.49296	-0.0375	0.07413	3.11288	0.04941	2.07466	0.00902	0.37878	0.001	0.209	0.04199	8.77598	0.80277	0.04001	1.39787
ctx-lh-caudalanteriorcingulate	2.73047	0.21417	2.68307	0.19054	-0.0474	-1.75117	0.10617	3.92236	0.01938	0.71612	-0.219	0.169	-8.09083	6.24361	-0.0715	0.10047	3.71168	0.05617	2.07499	0.01025	0.37884	0	0.219	0	8.09083	0.84186	0.02078	1.68238
ctx-lh-caudalmiddlefrontal	2.68317	0.14208	2.64973	0.14105	-0.03343	-1.25385	0.04602	1.72597	0.0084	0.31512	-0.137	0.045	-5.13791	1.68764	-0.033	0.04637	1.73889	0.03241	1.21546	0.00592	0.22191	0.006	0.137	0.22502	5.13791	0.92205	0.00042	3.3731
ctx-lh-cuneus	1.923	0.11583	1.9006	0.11291	-0.0224	-1.17167	0.06156	3.21997	0.01124	0.58788	-0.198	0.129	-10.3567	6.74757	-0.0215	0.049	2.56303	0.04272	2.23444	0.0078	0.40795	0.004	0.198	0.20922	10.3567	0.84195	0.05574	1.25381
ctx-lh-entorhinal	3.22487	0.39566	3.22213	0.42043	-0.00273	-0.08479	0.165	5.11862	0.03012	0.93453	-0.313	0.389	-9.70994	12.0676	0.0045	0.1272	3.94602	0.10244	3.17801	0.0187	0.58022	0.004	0.389	0.12409	12.0676	0.92091	0.92833	0.0322985
ctx-lh-frontalpole	2.88957	0.26723	2.87793	0.33206	-0.01163	-0.40341	0.17137	5.94253	0.03129	1.08495	-0.371	0.341	-12.8652	11.8249	-0.0165	0.1345	4.66407	0.10389	3.60256	0.01897	0.65773	0.011	0.371	0.38144	12.8652	0.84263	0.71273	0.147074
ctx-lh-fusiform	2.5186	0.2002	2.49307	0.17505	-0.02553	-1.01896	0.08174	3.26207	0.01492	0.59557	-0.164	0.178	-6.54473	7.10342	-0.0365	0.06967	2.78018	0.04833	1.92854	0.00882	0.3521	0.001	0.178	0.0399	7.10342	0.89976	0.09778	1.00975
ctx-lh-inferiorparietal	2.52543	0.13714	2.49807	0.13126	-0.02737	-1.08955	0.0472	1.87928	0.00862	0.34311	-0.132	0.042	-5.2553	1.67214	-0.0215	0.04283	1.70532	0.03324	1.32338	0.00607	0.24162	0.003	0.132	0.11944	5.2553	0.92019	0.00353	2.45194
ctx-lh-inferiortemporal	2.53933	0.19628	2.5828	0.18065	0.04347	1.69721	0.08962	3.49918	0.01636	0.63886	-0.151	0.219	-5.89598	8.55113	0.0345	0.07747	3.02478	0.06146	2.39986	0.01122	0.43815	0	0.219	0	8.55113	0.86588	0.0127	1.89631
ctx-lh-insula	3.0332	0.15692	2.97513	0.17702	-0.05807	-1.93287	0.07374	2.45457	0.01346	0.44814	-0.196	0.071	-6.52427	2.36339	-0.0575	0.076	2.52982	0.05432	1.80806	0.00992	0.3301	0.005	0.196	0.16643	6.52427	0.8501	0.00017	3.76957
ctx-lh-isthmuscingulate	2.71	0.20307	2.52947	0.23903	-0.18053	-6.89129	0.11568	4.41586	0.02112	0.80622	-0.469	0.072	-17.9026	2.74837	-0.182	0.18533	7.07451	0.10755	4.10521	0.01964	0.7495	0.037	0.469	1.41236	17.9026	0.60218	0	30
ctx-lh-lateraloccipital	2.20197	0.10003	2.19437	0.08909	-0.0076	-0.34574	0.04732	2.15288	0.00864	0.39306	-0.118	0.087	-5.3681	3.95784	-0.0095	0.0396	1.8015	0.02602	1.18374	0.00475	0.21612	0.001	0.118	0.04549	5.3681	0.87606	0.3863	0.413079
ctx-lh-lateralorbitofrontal	2.6841	0.16189	2.64567	0.16844	-0.03843	-1.44221	0.07925	2.97404	0.01447	0.54298	-0.22	0.092	-8.25552	3.45231	-0.0275	0.0667	2.50292	0.05663	2.12508	0.01034	0.38798	0	0.22	0	8.25552	0.86328	0.01271	1.89577
ctx-lh-lingual	1.96853	0.10281	1.94517	0.09607	-0.02337	-1.1941	0.0652	3.332	0.0119	0.60834	-0.138	0.134	-7.05215	6.84774	-0.015	0.05383	2.75102	0.04264	2.17904	0.00779	0.39784	0.002	0.138	0.1022	7.05215	0.76724	0.05932	1.22683
ctx-lh-medialorbitofrontal	2.54003	0.16721	2.4922	0.15105	-0.04783	-1.90108	0.09174	3.64594	0.01675	0.66565	-0.232	0.174	-9.22055	6.91542	-0.05	0.08157	3.24177	0.06245	2.48197	0.0114	0.45314	0	0.232	0	9.22055	0.7987	0.00785	2.10507
ctx-lh-middletemporal	2.71963	0.1524	2.72833	0.15163	0.0087	0.31939	0.08518	3.12715	0.01555	0.57094	-0.145	0.247	-5.32309	9.0676	-0.0025	0.0619	2.27241	0.05806	2.13136	0.0106	0.38913	0.001	0.247	0.03672	9.0676	0.84631	0.58018	0.236439
ctx-lh-paracentral	2.4721	0.1306	2.47137	0.14486	-0.00073	-0.02967	0.05034	2.03675	0.00919	0.37186	-0.084	0.103	-3.39843	4.16711	-0.005	0.04013	1.62369	0.02947	1.19246	0.00538	0.21771	0.001	0.103	0.04045	4.16711	0.93551	0.93696	0.0282813
ctx-lh-parahippocampal	2.60533	0.30526	2.6009	0.30017	-0.00443	-0.17031	0.15223	5.84817	0.02779	1.06772	-0.253	0.375	-9.71912	14.4058	-0.0185	0.11277	4.33199	0.1002	3.84939	0.01829	0.7028	0.001	0.375	0.03842	14.4058	0.87741	0.87438	0.058304
ctx-lh-parsopercularis	2.64603	0.14508	2.63333	0.14725	-0.0127	-0.48112	0.06938	2.62822	0.01267	0.47984	-0.161	0.132	-6.09922	5.0006	-0.0115	0.05657	2.14293	0.04086	1.54805	0.00746	0.28263	0.001	0.161	0.03789	6.09922	0.88734	0.32432	0.489029
ctx-lh-parsorbitalis	2.7631	0.25609	2.7422	0.23454	-0.0209	-0.75927	0.08135	2.9553	0.01485	0.53956	-0.173	0.154	-6.28486	5.59461	-0.0225	0.06843	2.48609	0.04717	1.7136	0.00861	0.31286	0.006	0.173	0.21797	6.28486	0.94338	0.17	0.769557
ctx-lh-parstriangularis	2.56437	0.19189	2.5596	0.19749	-0.00477	-0.18605	0.06293	2.4563	0.01149	0.44846	-0.156	0.131	-6.08903	5.11323	0.005	0.04837	1.88786	0.03954	1.54347	0.00722	0.2818	0.002	0.156	0.07806	6.08903	0.94918	0.68129	0.166669
ctx-lh-pericalcarine	1.69817	0.13036	1.68373	0.11333	-0.01443	-0.85356	0.06344	3.75198	0.01158	0.68501	-0.134	0.113	-7.92454	6.68263	-0.0305	0.05263	3.11265	0.03708	2.1928	0.00677	0.40035	0	0.134	0	7.92454	0.86279	0.22272	0.652245
ctx-lh-postcentral	2.23627	0.13174	2.20743	0.13384	-0.02883	-1.29772	0.03376	1.51959	0.00616	0.27744	-0.106	0.036	-4.7708	1.62027	-0.034	0.0365	1.64277	0.02494	1.12228	0.00455	0.2049	0.001	0.106	0.045	4.7708	0.94579	6e-05	4.20685
ctx-lh-posteriorcingulate	2.72483	0.14321	2.69103	0.15986	-0.0338	-1.24818	0.07212	2.66316	0.01317	0.48622	-0.188	0.1	-6.94256	3.69286	-0.041	0.06627	2.44713	0.04289	1.58403	0.00783	0.2892	0.003	0.188	0.11079	6.94256	0.86745	0.01568	1.80469
ctx-lh-precentral	2.62877	0.12451	2.60743	0.15348	-0.02133	-0.81484	0.05058	1.932	0.00923	0.35273	-0.142	0.075	-5.42379	2.86467	-0.018	0.04087	1.56093	0.03608	1.37803	0.00659	0.25159	0.001	0.142	0.03819	5.42379	0.92538	0.0282	1.54978
ctx-lh-precuneus	2.46613	0.17017	2.43713	0.17859	-0.029	-1.18288	0.03561	1.45258	0.0065	0.2652	-0.113	0.04	-4.60917	1.63156	-0.0235	0.036	1.46841	0.02824	1.1519	0.00516	0.21031	0.003	0.113	0.12237	4.60917	0.96626	0.00011	3.94574
ctx-lh-rostralanteriorcingulate	2.90243	0.21554	2.81553	0.19552	-0.0869	-3.03954	0.09565	3.3455	0.01746	0.6108	-0.278	0.089	-9.72373	3.11299	-0.0645	0.1001	3.50124	0.08121	2.84049	0.01483	0.5186	0.001	0.278	0.03498	9.72373	0.81435	3e-05	4.56671
ctx-lh-rostralmiddlefrontal	2.49107	0.1264	2.46357	0.12578	-0.0275	-1.11007	0.0519	2.09483	0.00947	0.38246	-0.125	0.065	-5.04578	2.62381	-0.0285	0.04743	1.91471	0.03388	1.36768	0.00619	0.2497	0.002	0.125	0.08074	5.04578	0.89544	0.007	2.15464
ctx-lh-superiorfrontal	2.88453	0.15054	2.86	0.15878	-0.02453	-0.85414	0.04147	1.4437	0.00757	0.26358	-0.097	0.05	-3.37712	1.74078	-0.023	0.03867	1.34621	0.0282	0.98195	0.00515	0.17928	0	0.097	0	3.37712	0.95298	0.00299	2.52412
ctx-lh-superiorparietal	2.384	0.14873	2.35013	0.15136	-0.03387	-1.43074	0.03862	1.63159	0.00705	0.29789	-0.102	0.037	-4.30913	1.56312	-0.0335	0.04107	1.73492	0.03055	1.29072	0.00558	0.23565	0.002	0.102	0.0845	4.30913	0.9432	4e-05	4.35784
ctx-lh-superiortemporal	2.793	0.16971	2.79083	0.15125	-0.00217	-0.0776	0.06456	2.31245	0.01179	0.42219	-0.166	0.134	-5.94574	4.79957	-0.007	0.05043	1.80641	0.03927	1.40643	0.00717	0.25678	0.001	0.166	0.03582	5.94574	0.92184	0.85544	0.0678107
ctx-lh-supramarginal	2.5849	0.14599	2.56753	0.145	-0.01737	-0.67412	0.04813	1.86825	0.00879	0.34109	-0.093	0.1	-3.60994	3.88166	-0.011	0.0409	1.5876	0.02997	1.16322	0.00547	0.21237	0.003	0.1	0.11645	3.88166	0.94014	0.0577	1.23884
ctx-lh-temporalpole	3.592	0.33469	3.60767	0.27443	0.01567	0.4352	0.15769	4.38037	0.02879	0.79974	-0.267	0.449	-7.41702	12.4728	-0.019	0.12287	3.41312	0.09748	2.70785	0.0178	0.49438	0.012	0.449	0.33335	12.4728	0.87018	0.59048	0.228799
ctx-lh-transversetemporal	2.32333	0.18867	2.34703	0.19753	0.0237	1.01491	0.10725	4.59295	0.01958	0.83855	-0.269	0.29	-11.5194	12.4187	0.0405	0.07923	3.39302	0.07477	3.20175	0.01365	0.58456	0.004	0.29	0.17129	12.4187	0.84363	0.23593	0.627212
ctx-rh-bankssts	2.5256	0.18212	2.53723	0.18338	0.01163	0.45956	0.09523	3.762	0.01739	0.68684	-0.134	0.291	-5.29348	11.4955	-0.008	0.06203	2.45054	0.07231	2.85639	0.0132	0.5215	0	0.291	0	11.4955	0.86656	0.50873	0.293509
ctx-rh-caudalanteriorcingulate	2.64137	0.22379	2.58223	0.20851	-0.05913	-2.26408	0.11109	4.2532	0.02028	0.77653	-0.288	0.166	-11.0269	6.35577	-0.0575	0.10093	3.86451	0.07361	2.81836	0.01344	0.51456	0.013	0.288	0.49773	11.0269	0.8378	0.00678	2.1688
ctx-rh-caudalmiddlefrontal	2.6802	0.14837	2.6471	0.14222	-0.0331	-1.24266	0.04513	1.69441	0.00824	0.30935	-0.13	0.059	-4.88053	2.21501	-0.022	0.04237	1.59055	0.03624	1.36065	0.00662	0.24842	0.005	0.13	0.18771	4.88053	0.92832	0.00038	3.41786
ctx-rh-cuneus	1.92373	0.12186	1.89557	0.10405	-0.02817	-1.47497	0.05814	3.04479	0.01062	0.5559	-0.167	0.088	-8.74506	4.60817	-0.027	0.04937	2.58512	0.04099	2.14664	0.00748	0.39192	0.003	0.167	0.15709	8.74506	0.84388	0.0128	1.89287
ctx-rh-entorhinal	3.40353	0.46348	3.4285	0.46968	0.02497	0.73087	0.23034	6.74295	0.04205	1.23109	-0.519	0.38	-15.1931	11.1241	0.0775	0.19337	5.66059	0.12256	3.58787	0.02238	0.65505	0.026	0.519	0.76112	15.1931	0.88062	0.55733	0.253889
ctx-rh-frontalpole	2.85553	0.28946	2.81307	0.27868	-0.04247	-1.49831	0.15083	5.32156	0.02754	0.97158	-0.315	0.28	-11.1139	9.87898	-0.0705	0.12847	4.53257	0.08685	3.0641	0.01586	0.55943	0.011	0.315	0.38811	11.1139	0.8531	0.13388	0.873279
ctx-rh-fusiform	2.5799	0.21743	2.55403	0.18494	-0.02587	-1.00768	0.07869	3.06554	0.01437	0.55969	-0.169	0.109	-6.58365	4.24626	-0.034	0.0706	2.75033	0.04157	1.61951	0.00759	0.29568	0.01	0.169	0.38956	6.58365	0.91855	0.0822	1.08511
ctx-rh-inferiorparietal	2.5673	0.15291	2.54283	0.13863	-0.02447	-0.95757	0.03928	1.53725	0.00717	0.28066	-0.11	0.051	-4.30517	1.99604	-0.025	0.03847	1.50551	0.02513	0.98336	0.00459	0.17954	0	0.11	0	4.30517	0.95125	0.00192	2.71662
ctx-rh-inferiortemporal	2.60563	0.22822	2.63107	0.18429	0.02543	0.97135	0.08324	3.17922	0.0152	0.58044	-0.13	0.249	-4.96496	9.50981	0.02	0.06223	2.37682	0.05993	2.28899	0.01094	0.41791	0.001	0.249	0.03819	9.50981	0.91484	0.10499	0.978843
ctx-rh-insula	3.02187	0.16186	2.91657	0.15435	-0.1053	-3.54639	0.09695	3.26523	0.0177	0.59615	-0.306	0.044	-10.3057	1.48187	-0.11	0.1151	3.87644	0.08465	2.85085	0.01545	0.52049	0.002	0.306	0.06736	10.3057	0.63591	0	5.73336
ctx-rh-isthmuscingulate	2.6382	0.22088	2.48157	0.23291	-0.15663	-6.11877	0.16591	6.48113	0.03029	1.18329	-0.376	0.439	-14.6882	17.1492	-0.172	0.19677	7.68655	0.11337	4.42889	0.0207	0.8086	0.003	0.439	0.11719	17.1492	0.55468	2e-05	4.80147
ctx-rh-lateraloccipital	2.26463	0.12091	2.25637	0.10864	-0.00827	-0.3657	0.05907	2.61297	0.01078	0.47706	-0.14	0.161	-6.19332	7.12232	-0.0075	0.04187	1.8521	0.04179	1.84863	0.00763	0.33751	0.001	0.161	0.04423	7.12232	0.86965	0.44953	0.34724
ctx-rh-lateralorbitofrontal	2.64047	0.16422	2.56533	0.14957	-0.07513	-2.88652	0.09681	3.71923	0.01767	0.67904	-0.253	0.147	-9.71993	5.64755	-0.079	0.10327	3.96737	0.06465	2.4838	0.0118	0.45348	0.002	0.253	0.07684	9.71993	0.71725	0.0002	3.69542
ctx-rh-lingual	1.9641	0.10408	1.95903	0.0852	-0.00507	-0.2583	0.05275	2.68924	0.00963	0.49099	-0.096	0.092	-4.89405	4.69013	-0.0165	0.045	2.29409	0.02673	1.36261	0.00488	0.24878	0.001	0.096	0.05098	4.89405	0.84962	0.60283	0.219801
ctx-rh-medialorbitofrontal	2.48083	0.15602	2.4457	0.15243	-0.03513	-1.42629	0.08331	3.38216	0.01521	0.61749	-0.208	0.2	-8.44407	8.1193	-0.038	0.06933	2.81469	0.05696	2.31252	0.0104	0.42221	0.002	0.208	0.08119	8.44407	0.83478	0.02822	1.54951
ctx-rh-middletemporal	2.74257	0.17064	2.73853	0.15228	-0.00403	-0.14717	0.07737	2.8233	0.01413	0.51546	-0.128	0.192	-4.6706	7.0059	-0.014	0.06077	2.21732	0.04673	1.70511	0.00853	0.31131	0.001	0.192	0.03649	7.0059	0.88886	0.77728	0.109425
ctx-rh-paracentral	2.5127	0.18991	2.50887	0.17927	-0.00383	-0.15268	0.06231	2.4817	0.01138	0.4531	-0.149	0.102	-5.93441	4.06248	0.003	0.04843	1.92901	0.03835	1.5276	0.007	0.2789	0.001	0.149	0.03983	5.93441	0.94471	0.73857	0.131609
ctx-rh-parahippocampal	2.58243	0.31725	2.55337	0.28091	-0.02907	-1.13192	0.12008	4.67622	0.02192	0.85376	-0.233	0.212	-9.07356	8.25577	-0.0265	0.10007	3.89683	0.07025	2.73561	0.01283	0.49945	0.003	0.233	0.11683	9.07356	0.91775	0.19525	0.709407
ctx-rh-parsopercularis	2.69387	0.16982	2.6566	0.17668	-0.03727	-1.39302	0.06038	2.25712	0.01102	0.41209	-0.168	0.078	-6.27983	2.91563	-0.038	0.059	2.20542	0.03849	1.43891	0.00703	0.26271	0.007	0.168	0.26166	6.27983	0.91904	0.00208	2.68104
ctx-rh-parsorbitalis	2.78883	0.19876	2.7476	0.20877	-0.04123	-1.48953	0.08478	3.06275	0.01548	0.55918	-0.252	0.074	-9.10334	2.6732	-0.024	0.06597	2.383	0.06667	2.40855	0.01217	0.43974	0.001	0.252	0.03613	9.10334	0.89682	0.01248	1.90369
ctx-rh-parstriangularis	2.60363	0.16825	2.55837	0.15638	-0.04527	-1.75384	0.05354	2.07435	0.00977	0.37872	-0.128	0.066	-4.95932	2.55715	-0.049	0.0592	2.29368	0.03689	1.42917	0.00673	0.26093	0.005	0.128	0.19373	4.95932	0.91031	7e-05	4.15063
ctx-rh-pericalcarine	1.6773	0.11921	1.65723	0.08849	-0.02007	-1.20357	0.06601	3.95907	0.01205	0.72282	-0.168	0.081	-10.0764	4.85825	-0.019	0.05607	3.36279	0.03901	2.33976	0.00712	0.42718	0	0.168	0	10.0764	0.79187	0.10666	0.971981
ctx-rh-postcentral	2.22073	0.12986	2.1937	0.11845	-0.02703	-1.22477	0.04372	1.98076	0.00798	0.36164	-0.117	0.048	-5.30079	2.17469	-0.017	0.03763	1.70501	0.03467	1.57095	0.00633	0.28682	0.001	0.117	0.0453	5.30079	0.91743	0.00205	2.68824
ctx-rh-posteriorcingulate	2.72237	0.15994	2.62853	0.16945	-0.09383	-3.5072	0.08432	3.15153	0.01539	0.57539	-0.247	0.074	-9.2321	2.76589	-0.098	0.10497	3.92333	0.06942	2.59489	0.01268	0.47376	0.006	0.247	0.22426	9.2321	0.73237	0	5.9025
ctx-rh-precentral	2.62107	0.13749	2.60153	0.14266	-0.01953	-0.74803	0.04632	1.77398	0.00846	0.32388	-0.129	0.076	-4.94008	2.91043	-0.021	0.0404	1.54712	0.02919	1.11792	0.00533	0.2041	0.001	0.129	0.03829	4.94008	0.93768	0.02823	1.54929
ctx-rh-precuneus	2.4928	0.17121	2.47303	0.16606	-0.01977	-0.79611	0.0418	1.68356	0.00763	0.30737	-0.11	0.069	-4.43027	2.77899	-0.0115	0.0365	1.47004	0.02781	1.12003	0.00508	0.20449	0.003	0.11	0.12083	4.43027	0.96355	0.01486	1.82802
ctx-rh-rostralanteriorcingulate	2.9221	0.25164	2.80213	0.23715	-0.11997	-4.19154	0.13682	4.78046	0.02498	0.87279	-0.392	0.142	-13.6962	4.96136	-0.1165	0.14877	5.19778	0.10351	3.6165	0.0189	0.66028	0.004	0.392	0.13975	13.6962	0.74307	4e-05	4.35725
ctx-rh-rostralmiddlefrontal	2.47173	0.11858	2.43233	0.11023	-0.0394	-1.60683	0.05064	2.06522	0.00925	0.37706	-0.135	0.08	-5.50563	3.2626	-0.046	0.0526	2.14516	0.03617	1.47501	0.0066	0.2693	0.001	0.135	0.04078	5.50563	0.85039	0.0002	3.70805
ctx-rh-superiorfrontal	2.84037	0.15358	2.80707	0.15273	-0.0333	-1.1793	0.04041	1.43119	0.00738	0.2613	-0.109	0.085	-3.86016	3.01022	-0.0315	0.0417	1.47678	0.03133	1.10947	0.00572	0.20256	0.007	0.109	0.2479	3.86016	0.94335	0.0001	4.00935
ctx-rh-superiorparietal	2.39553	0.16873	2.365	0.1552	-0.03053	-1.28277	0.04047	1.70042	0.00739	0.31045	-0.168	0.029	-7.05803	1.21835	-0.0195	0.03513	1.47602	0.03641	1.52967	0.00665	0.27928	0.001	0.168	0.04201	7.05803	0.95253	0.00028	3.55392
ctx-rh-superiortemporal	2.82023	0.1909	2.81667	0.19048	-0.00357	-0.12655	0.05507	1.95399	0.01005	0.35675	-0.089	0.13	-3.15776	4.61246	-0.0155	0.04497	1.59544	0.03089	1.0961	0.00564	0.20012	0.003	0.13	0.10644	4.61246	0.95949	0.72536	0.139443
ctx-rh-supramarginal	2.64917	0.16156	2.63213	0.16023	-0.01703	-0.64504	0.03578	1.35502	0.00653	0.24739	-0.118	0.056	-4.4686	2.12069	-0.022	0.0321	1.21561	0.02268	0.85898	0.00414	0.15683	0.002	0.118	0.07573	4.4686	0.97056	0.01427	1.84573
ctx-rh-temporalpole	3.6282	0.47642	3.68257	0.33243	0.05437	1.4873	0.27662	7.56736	0.0505	1.38161	-0.408	0.857	-11.1616	23.4449	0.013	0.19817	5.42123	0.19736	5.39909	0.03603	0.98574	0.003	0.857	0.08207	23.4449	0.77221	0.29058	0.53674
ctx-rh-transversetemporal	2.33107	0.23325	2.3983	0.2491	0.06723	2.84323	0.11848	5.01041	0.02163	0.91477	-0.181	0.296	-7.6543	12.5175	0.063	0.10857	4.59117	0.08075	3.41484	0.01474	0.62346	0.002	0.296	0.08458	12.5175	0.84732	0.00419	2.37767
v4.5.0 vs. v5.0.0
Struct	Mean1	sd1	Mean2	sd2	Mean diff	Mean diff %	sd Diff	sd Diff %	se Diff	se Diff %	min Diff	max Diff	min Diff %	max Diff %	median	Mean AbsDiff	Mean AbsDiff %	sd AbsDiff	sd AbsDiff %	se AbsDiff	se AbsDiff %	min AbsDiff	max AbsDiff	min AbsDiff %	max AbsDiff %	ICC(1,1)	p	-log10(p)
ctx-lh-bankssts	2.39533	0.14534	2.36507	0.15152	-0.03027	-1.2716	0.0848	3.56286	0.01548	0.65049	-0.209	0.106	-8.78077	4.45341	-0.035	0.07473	3.13979	0.0486	2.04168	0.00887	0.37276	0.005	0.209	0.21006	8.78077	0.82287	0.0603	1.21967
ctx-lh-caudalanteriorcingulate	2.72293	0.21883	2.68307	0.19054	-0.03987	-1.4749	0.09979	3.692	0.01822	0.67406	-0.223	0.214	-8.25009	7.91713	-0.053	0.08713	3.22358	0.06123	2.26527	0.01118	0.41358	0	0.223	0	8.25009	0.86777	0.03687	1.43334
ctx-lh-caudalmiddlefrontal	2.68383	0.14526	2.64973	0.14105	-0.0341	-1.27869	0.04266	1.5995	0.00779	0.29203	-0.137	0.028	-5.13727	1.04996	-0.0295	0.0421	1.57868	0.03448	1.29293	0.0063	0.23606	0.001	0.137	0.0375	5.13727	0.92968	0.00014	3.84796
ctx-lh-cuneus	1.92567	0.12096	1.9006	0.11291	-0.02507	-1.31024	0.06475	3.38449	0.01182	0.61792	-0.191	0.106	-9.98361	5.54065	-0.03	0.05547	2.89926	0.04074	2.1296	0.00744	0.38881	0.002	0.191	0.10453	9.98361	0.83054	0.04265	1.3701
ctx-lh-entorhinal	3.23827	0.40368	3.22213	0.42043	-0.01613	-0.49945	0.17343	5.36907	0.03166	0.98025	-0.478	0.345	-14.7979	10.6805	0.012	0.13627	4.21852	0.10554	3.26732	0.01927	0.59653	0.005	0.478	0.15479	14.7979	0.91355	0.61425	0.211658
ctx-lh-frontalpole	2.905	0.30094	2.87793	0.33206	-0.02707	-0.93609	0.13895	4.80537	0.02537	0.87734	-0.325	0.334	-11.24	11.5512	-0.034	0.10973	3.79508	0.08722	3.01643	0.01592	0.55072	0.005	0.334	0.17293	11.5512	0.90345	0.29479	0.530486
ctx-lh-fusiform	2.5114	0.19561	2.49307	0.17505	-0.01833	-0.73268	0.07486	2.99189	0.01367	0.54624	-0.157	0.138	-6.2744	5.51507	-0.0195	0.06073	2.42716	0.04622	1.84729	0.00844	0.33727	0.001	0.157	0.03996	6.2744	0.91658	0.19023	0.720716
ctx-lh-inferiorparietal	2.52147	0.13781	2.49807	0.13126	-0.0234	-0.93236	0.04079	1.62539	0.00745	0.29675	-0.098	0.046	-3.90474	1.83284	-0.026	0.03847	1.53268	0.02645	1.05407	0.00483	0.19245	0.001	0.098	0.03984	3.90474	0.94087	0.00385	2.41476
ctx-lh-inferiortemporal	2.53387	0.1857	2.5828	0.18065	0.04893	1.9127	0.07708	3.01275	0.01407	0.55005	-0.08	0.196	-3.12704	7.66124	0.0235	0.07007	2.73876	0.05779	2.25872	0.01055	0.41238	0.003	0.196	0.11726	7.66124	0.88072	0.00162	2.79102
ctx-lh-insula	3.03813	0.17636	2.97513	0.17702	-0.063	-2.09537	0.07894	2.62543	0.01441	0.47933	-0.244	0.071	-8.11539	2.36145	-0.057	0.07967	2.6497	0.06141	2.0425	0.01121	0.37291	0.011	0.244	0.36586	8.11539	0.84465	0.00014	3.83929
ctx-lh-isthmuscingulate	2.70057	0.20554	2.52947	0.23903	-0.1711	-6.54298	0.11753	4.49437	0.02146	0.82056	-0.471	0.072	-18.0114	2.75333	-0.16	0.1759	6.72654	0.10995	4.20472	0.02007	0.76767	0	0.471	0	18.0114	0.62537	0	30
ctx-lh-lateraloccipital	2.195	0.09766	2.19437	0.08909	-0.00063	-0.02886	0.03726	1.69791	0.0068	0.30999	-0.069	0.089	-3.14396	4.05525	-0.009	0.03077	1.40187	0.02024	0.92236	0.0037	0.1684	0.006	0.089	0.27339	4.05525	0.92306	0.92647	0.0331671
ctx-lh-lateralorbitofrontal	2.67957	0.16294	2.64567	0.16844	-0.0339	-1.27318	0.07783	2.92324	0.01421	0.53371	-0.194	0.084	-7.28607	3.1548	-0.0335	0.06823	2.56264	0.0493	1.85166	0.009	0.33806	0.007	0.194	0.2629	7.28607	0.87354	0.02381	1.62331
ctx-lh-lingual	1.96713	0.10232	1.94517	0.09607	-0.02197	-1.12295	0.05799	2.96451	0.01059	0.54124	-0.122	0.134	-6.23674	6.85019	-0.015	0.04883	2.4964	0.03735	1.90942	0.00682	0.34861	0.006	0.134	0.30672	6.85019	0.81224	0.04699	1.32802
ctx-lh-medialorbitofrontal	2.53433	0.17117	2.4922	0.15105	-0.04213	-1.67644	0.09771	3.88792	0.01784	0.70983	-0.207	0.166	-8.23629	6.60495	-0.034	0.08593	3.41919	0.0612	2.43501	0.01117	0.44457	0	0.207	0	8.23629	0.79175	0.02512	1.6
ctx-lh-middletemporal	2.7209	0.16426	2.72833	0.15163	0.00743	0.27282	0.08053	2.95566	0.0147	0.53963	-0.155	0.204	-5.68887	7.48729	-0.0025	0.06143	2.25475	0.05136	1.88513	0.00938	0.34418	0.001	0.204	0.03671	7.48729	0.87324	0.61698	0.209729
ctx-lh-paracentral	2.4689	0.13154	2.47137	0.14486	0.00247	0.09986	0.05889	2.38421	0.01075	0.43529	-0.076	0.103	-3.07676	4.16981	-0.0055	0.04867	1.9702	0.03201	1.29584	0.00584	0.23659	0.001	0.103	0.04048	4.16981	0.91214	0.82016	0.0860989
ctx-lh-parahippocampal	2.61093	0.31388	2.6009	0.30017	-0.01003	-0.38502	0.13818	5.30243	0.02523	0.96809	-0.271	0.275	-10.3994	10.5529	-0.007	0.10917	4.18918	0.08288	3.18036	0.01513	0.58065	0.001	0.275	0.03838	10.5529	0.90148	0.69375	0.158795
ctx-lh-parsopercularis	2.64953	0.15376	2.63333	0.14725	-0.0162	-0.6133	0.07075	2.6785	0.01292	0.48903	-0.161	0.129	-6.09518	4.88371	-0.007	0.05893	2.23111	0.04104	1.5537	0.00749	0.28366	0.001	0.161	0.03786	6.09518	0.88757	0.21981	0.657956
ctx-lh-parsorbitalis	2.77017	0.25714	2.7422	0.23454	-0.02797	-1.01469	0.08585	3.11494	0.01567	0.56871	-0.253	0.145	-9.17936	5.26091	-0.0195	0.06943	2.51918	0.0565	2.05007	0.01032	0.37429	0.001	0.253	0.03628	9.17936	0.93487	0.08486	1.07131
ctx-lh-parstriangularis	2.57783	0.19613	2.5596	0.19749	-0.01823	-0.70982	0.07533	2.93277	0.01375	0.53545	-0.192	0.16	-7.47455	6.22879	-0.022	0.0573	2.23069	0.05121	1.99369	0.00935	0.364	0.002	0.192	0.07785	7.47455	0.92496	0.1953	0.709298
ctx-lh-pericalcarine	1.69473	0.13356	1.68373	0.11333	-0.011	-0.65118	0.05908	3.49729	0.01079	0.63851	-0.125	0.113	-7.39981	6.68942	-0.0085	0.0472	2.79417	0.0362	2.14315	0.00661	0.39128	0.002	0.125	0.1184	7.39981	0.8861	0.31624	0.499986
ctx-lh-postcentral	2.2375	0.13542	2.20743	0.13384	-0.03007	-1.35285	0.03732	1.67932	0.00681	0.3066	-0.14	0.036	-6.2993	1.61982	-0.034	0.03813	1.71581	0.0287	1.29148	0.00524	0.23579	0	0.14	0	6.2993	0.93864	0.00013	3.88846
ctx-lh-posteriorcingulate	2.72023	0.15645	2.69103	0.15986	-0.0292	-1.07923	0.07974	2.94716	0.01456	0.53808	-0.194	0.126	-7.17023	4.65695	-0.031	0.06953	2.56995	0.04732	1.7488	0.00864	0.31929	0.009	0.194	0.33263	7.17023	0.86099	0.0543	1.26524
ctx-lh-precentral	2.62587	0.12921	2.60743	0.15348	-0.01843	-0.70446	0.05068	1.93691	0.00925	0.35363	-0.165	0.043	-6.30578	1.64333	-0.0145	0.03643	1.39237	0.03933	1.50315	0.00718	0.27444	0	0.165	0	6.30578	0.93009	0.05585	1.25297
ctx-lh-precuneus	2.46313	0.17016	2.43713	0.17859	-0.026	-1.06117	0.03105	1.2673	0.00567	0.23138	-0.098	0.018	-3.99978	0.73465	-0.0235	0.03167	1.29245	0.02502	1.02124	0.00457	0.18645	0.003	0.098	0.12244	3.99978	0.97371	8e-05	4.09697
ctx-lh-rostralanteriorcingulate	2.89307	0.21936	2.81553	0.19552	-0.07753	-2.71637	0.10283	3.60252	0.01877	0.65773	-0.304	0.161	-10.6506	5.64061	-0.0825	0.10413	3.6483	0.07466	2.61577	0.01363	0.47757	0.006	0.304	0.21021	10.6506	0.81798	0.00028	3.55161
ctx-lh-rostralmiddlefrontal	2.48913	0.13354	2.46357	0.12578	-0.02557	-1.03243	0.05455	2.20269	0.00996	0.40215	-0.127	0.064	-5.12852	2.58444	-0.026	0.0493	1.99083	0.03372	1.36177	0.00616	0.24862	0.003	0.127	0.12115	5.12852	0.89597	0.01567	1.80486
ctx-lh-superiorfrontal	2.88143	0.16305	2.86	0.15878	-0.02143	-0.74662	0.04083	1.42229	0.00745	0.25967	-0.082	0.047	-2.85643	1.63722	-0.025	0.0395	1.37596	0.02298	0.80063	0.0042	0.14617	0.003	0.082	0.1045	2.85643	0.96017	0.00749	2.12558
ctx-lh-superiorparietal	2.38533	0.15325	2.35013	0.15136	-0.0352	-1.48665	0.03877	1.63744	0.00708	0.29895	-0.131	0.02	-5.53272	0.84469	-0.0325	0.04053	1.7119	0.03294	1.39136	0.00601	0.25403	0.004	0.131	0.16894	5.53272	0.94271	3e-05	4.56291
ctx-lh-superiortemporal	2.7956	0.17093	2.79083	0.15125	-0.00477	-0.17065	0.05572	1.99484	0.01017	0.36421	-0.115	0.143	-4.11712	5.11955	-0.012	0.04257	1.52393	0.03541	1.2677	0.00646	0.23145	0.001	0.143	0.0358	5.11955	0.94191	0.64289	0.191863
ctx-lh-supramarginal	2.5805	0.14821	2.56753	0.145	-0.01297	-0.50375	0.04568	1.77468	0.00834	0.32401	-0.093	0.079	-3.61303	3.06913	-0.02	0.03943	1.53198	0.02554	0.99204	0.00466	0.18112	0.001	0.093	0.03885	3.61303	0.94923	0.13086	0.883207
ctx-lh-temporalpole	3.54987	0.34105	3.60767	0.27443	0.0578	1.61508	0.1665	4.65245	0.0304	0.84942	-0.172	0.459	-4.80613	12.8256	0.0275	0.1358	3.7946	0.11	3.07379	0.02008	0.5612	0.004	0.459	0.11177	12.8256	0.8437	0.06723	1.17245
ctx-lh-transversetemporal	2.32577	0.16841	2.34703	0.19753	0.02127	0.91023	0.10818	4.63033	0.01975	0.84538	-0.269	0.244	-11.5134	10.4434	0.031	0.08293	3.54962	0.07111	3.04348	0.01298	0.55566	0.004	0.269	0.1712	11.5134	0.82546	0.29048	0.536879
ctx-rh-bankssts	2.5322	0.17703	2.53723	0.18338	0.00503	0.19858	0.09417	3.7153	0.01719	0.67832	-0.174	0.214	-6.86467	8.44276	-0.015	0.07263	2.86554	0.05863	2.31296	0.0107	0.42229	0.008	0.214	0.31562	8.44276	0.86738	0.7718	0.112495
ctx-rh-caudalanteriorcingulate	2.6483	0.2303	2.58223	0.20851	-0.06607	-2.52619	0.10192	3.89721	0.01861	0.71153	-0.294	0.183	-11.2417	6.99738	-0.068	0.10047	3.84155	0.0668	2.55414	0.0122	0.46632	0.018	0.294	0.68827	11.2417	0.85377	0.00134	2.87449
ctx-rh-caudalmiddlefrontal	2.67347	0.1532	2.6471	0.14222	-0.02637	-0.99112	0.04929	1.85285	0.009	0.33828	-0.129	0.059	-4.84911	2.21781	-0.013	0.0423	1.59006	0.03603	1.35418	0.00658	0.24724	0.004	0.129	0.15036	4.84911	0.93083	0.00655	2.18404
ctx-rh-cuneus	1.92453	0.12126	1.89557	0.10405	-0.02897	-1.51654	0.05859	3.06746	0.0107	0.56004	-0.189	0.097	-9.89502	5.0784	-0.027	0.04997	2.61599	0.04145	2.17006	0.00757	0.3962	0.003	0.189	0.15706	9.89502	0.83943	0.01124	1.94942
ctx-rh-entorhinal	3.39563	0.51548	3.4285	0.46968	0.03287	0.96325	0.22719	6.6585	0.04148	1.21567	-0.357	0.482	-10.4629	14.1263	0.0215	0.1814	5.31643	0.13672	4.00705	0.02496	0.73158	0.006	0.482	0.17585	14.1263	0.89511	0.43459	0.361924
ctx-rh-frontalpole	2.88443	0.2955	2.81307	0.27868	-0.07137	-2.50519	0.12637	4.43614	0.02307	0.80992	-0.358	0.245	-12.5669	8.60027	-0.079	0.11437	4.01463	0.0878	3.082	0.01603	0.56269	0.011	0.358	0.38614	12.5669	0.87725	0.00435	2.36119
ctx-rh-fusiform	2.5838	0.22118	2.55403	0.18494	-0.02977	-1.15872	0.07671	2.98627	0.01401	0.54522	-0.187	0.109	-7.27933	4.24303	-0.029	0.0669	2.60421	0.0466	1.8141	0.00851	0.33121	0.003	0.187	0.11678	7.27933	0.92123	0.04221	1.37461
ctx-rh-inferiorparietal	2.5667	0.15734	2.54283	0.13863	-0.02387	-0.9342	0.04555	1.7828	0.00832	0.32549	-0.118	0.055	-4.61881	2.15284	-0.0155	0.04073	1.59441	0.03078	1.20474	0.00562	0.21995	0.002	0.118	0.07829	4.61881	0.94178	0.00758	2.12014
ctx-rh-inferiortemporal	2.60243	0.23284	2.63107	0.18429	0.02863	1.09423	0.08919	3.40858	0.01628	0.62232	-0.137	0.273	-5.23551	10.4328	0.0145	0.07017	2.68144	0.06091	2.32786	0.01112	0.42501	0.001	0.273	0.03821	10.4328	0.90379	0.08924	1.04942
ctx-rh-insula	3.0208	0.16283	2.91657	0.15435	-0.10423	-3.5111	0.09598	3.23316	0.01752	0.59029	-0.292	0.037	-9.83601	1.24634	-0.1015	0.11277	3.79854	0.08542	2.87746	0.0156	0.52535	0	0.292	0	9.83601	0.64454	0	5.73336
ctx-rh-isthmuscingulate	2.657	0.21481	2.48157	0.23291	-0.17543	-6.8281	0.12976	5.05025	0.02369	0.92205	-0.397	0.164	-15.4518	6.38309	-0.1755	0.1889	7.35224	0.10845	4.22093	0.0198	0.77063	0.021	0.397	0.81734	15.4518	0.59263	0	7.22472
ctx-rh-lateraloccipital	2.26307	0.1282	2.25637	0.10864	-0.0067	-0.2965	0.0637	2.8191	0.01163	0.51469	-0.147	0.142	-6.50524	6.28397	-0.007	0.05043	2.23184	0.03838	1.69864	0.00701	0.31013	0	0.147	0	6.50524	0.85926	0.56901	0.244877
ctx-rh-lateralorbitofrontal	2.6423	0.16486	2.56533	0.14957	-0.07697	-2.95592	0.09755	3.74661	0.01781	0.68403	-0.289	0.078	-11.0991	2.99561	-0.065	0.09777	3.75474	0.07588	2.91403	0.01385	0.53203	0.001	0.289	0.0384	11.0991	0.71112	0.00017	3.77943
ctx-rh-lingual	1.96603	0.10796	1.95903	0.0852	-0.007	-0.35668	0.05485	2.79468	0.01001	0.51024	-0.107	0.083	-5.45214	4.22923	0.0015	0.04353	2.21822	0.03314	1.68869	0.00605	0.30831	0	0.107	0	5.45214	0.84346	0.49009	0.309726
ctx-rh-medialorbitofrontal	2.4853	0.1568	2.4457	0.15243	-0.0396	-1.60617	0.09515	3.8591	0.01737	0.70457	-0.276	0.2	-11.1945	8.11195	-0.0345	0.08033	3.2583	0.06324	2.56492	0.01155	0.46829	0.002	0.276	0.08111	11.1945	0.78703	0.03017	1.52043
ctx-rh-middletemporal	2.74193	0.17133	2.73853	0.15228	-0.0034	-0.12408	0.07932	2.89449	0.01448	0.52846	-0.127	0.18	-4.63464	6.56879	-0.0075	0.06673	2.43532	0.04118	1.50291	0.00752	0.27439	0.004	0.18	0.14597	6.56879	0.88382	0.81602	0.0883008
ctx-rh-paracentral	2.50917	0.1955	2.50887	0.17927	-0.0003	-0.01196	0.07211	2.87389	0.01316	0.5247	-0.187	0.094	-7.45312	3.74649	0.021	0.05823	2.32096	0.04113	1.63913	0.00751	0.29926	0.003	0.187	0.11957	7.45312	0.92848	0.98198	0.00789982
ctx-rh-parahippocampal	2.56767	0.3064	2.55337	0.28091	-0.0143	-0.55848	0.12817	5.00572	0.0234	0.91392	-0.26	0.319	-10.1542	12.4584	-0.0265	0.09983	3.89895	0.07956	3.10707	0.01453	0.56727	0.008	0.319	0.31243	12.4584	0.90682	0.5459	0.262883
ctx-rh-parsopercularis	2.69163	0.1654	2.6566	0.17668	-0.03503	-1.31009	0.05336	1.99557	0.00974	0.36434	-0.137	0.078	-5.12319	2.91684	-0.029	0.05077	1.89845	0.03809	1.42458	0.00696	0.26009	0.005	0.137	0.18698	5.12319	0.9327	0.00118	2.92668
ctx-rh-parsorbitalis	2.78607	0.19018	2.7476	0.20877	-0.03847	-1.39028	0.0999	3.61048	0.01824	0.65918	-0.317	0.08	-11.4571	2.89139	-0.026	0.074	2.67454	0.07645	2.7632	0.01396	0.50449	0.005	0.317	0.18072	11.4571	0.86149	0.04369	1.35964
ctx-rh-parstriangularis	2.60193	0.16614	2.55837	0.15638	-0.04357	-1.68853	0.05124	1.98578	0.00935	0.36255	-0.141	0.034	-5.4648	1.31775	-0.053	0.0557	2.15879	0.03714	1.43935	0.00678	0.26279	0.008	0.141	0.31006	5.4648	0.91625	7e-05	4.18254
ctx-rh-pericalcarine	1.6646	0.1259	1.65723	0.08849	-0.00737	-0.44353	0.07232	4.3543	0.0132	0.79498	-0.164	0.125	-9.87406	7.52596	-0.02	0.06123	3.68672	0.03752	2.25895	0.00685	0.41243	0.013	0.164	0.7827	9.87406	0.78367	0.58119	0.235683
ctx-rh-postcentral	2.2195	0.13159	2.1937	0.11845	-0.0258	-1.16922	0.04135	1.87377	0.00755	0.3421	-0.099	0.037	-4.48654	1.67679	-0.019	0.03593	1.62845	0.03259	1.47714	0.00595	0.26969	0.001	0.099	0.04532	4.48654	0.92676	0.00189	2.72332
ctx-rh-posteriorcingulate	2.72247	0.16011	2.62853	0.16945	-0.09393	-3.51087	0.07937	2.96659	0.01449	0.54162	-0.282	0.074	-10.5401	2.76583	-0.0915	0.10287	3.84476	0.06694	2.502	0.01222	0.4568	0.016	0.282	0.59802	10.5401	0.74575	0	6.37962
ctx-rh-precentral	2.61077	0.14487	2.60153	0.14266	-0.00923	-0.35429	0.03786	1.45264	0.00691	0.26521	-0.094	0.062	-3.60686	2.37899	-0.009	0.03103	1.19077	0.02292	0.8793	0.00418	0.16054	0.001	0.094	0.03837	3.60686	0.96444	0.19198	0.716742
ctx-rh-precuneus	2.4896	0.17101	2.47303	0.16606	-0.01657	-0.66766	0.04195	1.69079	0.00766	0.30869	-0.133	0.069	-5.36006	2.78078	-0.008	0.03297	1.3286	0.03033	1.22224	0.00554	0.22315	0.002	0.133	0.0806	5.36006	0.96529	0.03894	1.40965
ctx-rh-rostralanteriorcingulate	2.91747	0.24895	2.80213	0.23715	-0.11533	-4.03292	0.13307	4.65317	0.0243	0.84955	-0.37	0.175	-12.938	6.11931	-0.133	0.14913	5.21482	0.09198	3.2164	0.01679	0.58723	0.004	0.37	0.13987	12.938	0.7558	5e-05	4.29073
ctx-rh-rostralmiddlefrontal	2.46667	0.12464	2.43233	0.11023	-0.03433	-1.40165	0.05415	2.21081	0.00989	0.40364	-0.143	0.08	-5.83793	3.26597	-0.029	0.04967	2.02762	0.04	1.6331	0.0073	0.29816	0.001	0.143	0.04083	5.83793	0.8578	0.00164	2.78558
ctx-rh-superiorfrontal	2.84307	0.15643	2.80707	0.15273	-0.036	-1.27431	0.04401	1.55798	0.00804	0.28445	-0.109	0.085	-3.85831	3.00878	-0.0315	0.04533	1.60468	0.03394	1.2014	0.0062	0.21935	0.003	0.109	0.10619	3.85831	0.93454	0.00011	3.9692
ctx-rh-superiorparietal	2.3927	0.16939	2.365	0.1552	-0.0277	-1.16443	0.04008	1.68504	0.00732	0.30764	-0.153	0.045	-6.43167	1.89166	-0.02	0.0343	1.44187	0.0344	1.44614	0.00628	0.26403	0	0.153	0	6.43167	0.95633	0.00071	3.14576
ctx-rh-superiortemporal	2.82157	0.18985	2.81667	0.19048	-0.0049	-0.17381	0.05433	1.92704	0.00992	0.35183	-0.108	0.125	-3.83099	4.43401	-0.004	0.0447	1.5856	0.03015	1.06954	0.0055	0.19527	0.003	0.125	0.10642	4.43401	0.9602	0.62501	0.204114
ctx-rh-supramarginal	2.65373	0.16567	2.63213	0.16023	-0.0216	-0.81727	0.04272	1.61627	0.0078	0.29509	-0.133	0.056	-5.03229	2.11886	-0.0135	0.03633	1.37474	0.03069	1.16113	0.0056	0.21199	0.001	0.133	0.03783	5.03229	0.95817	0.00969	2.01384
ctx-rh-temporalpole	3.59997	0.505	3.68257	0.33243	0.0826	2.26844	0.338	9.28257	0.06171	1.69476	-0.408	0.869	-11.2049	23.8653	0.0145	0.25587	7.02686	0.23147	6.35688	0.04226	1.1606	0.013	0.869	0.35702	23.8653	0.68053	0.19113	0.718666
ctx-rh-transversetemporal	2.32667	0.2236	2.3983	0.2491	0.07163	3.03212	0.11582	4.90262	0.02115	0.89509	-0.123	0.282	-5.20638	11.9366	0.0345	0.10137	4.29068	0.08997	3.80811	0.01643	0.69526	0.004	0.282	0.16931	11.9366	0.84177	0.00205	2.68908

## Sheet: Between-version HP
v4.3.1 vs. v4.5.0
Struct	Mean1	sd1	Mean2	sd2	Mean diff	Mean diff %	sd Diff	sd Diff %	se Diff	se Diff %	min Diff	max Diff	min Diff %	max Diff %	median	Mean AbsDiff	Mean AbsDiff %	sd AbsDiff	sd AbsDiff %	se AbsDiff	se AbsDiff %	min AbsDiff	max AbsDiff	min AbsDiff %	max AbsDiff %	ICC	p	-log10(p)
ctx-lh-bankssts	2.3871	0.15497	2.39027	0.15572	0.00317	0.13257	0.03777	1.58131	0.0069	0.28871	-0.092	0.086	-3.85148	3.60031	0	0.02677	1.12056	0.02638	1.10443	0.00482	0.20164	0	0.092	0	3.85148	0.97121	0.64952	0.187407
ctx-lh-caudalanteriorcingulate	2.715	0.21198	2.70473	0.20669	-0.01027	-0.37886	0.04934	1.82092	0.00901	0.33245	-0.095	0.156	-3.50571	5.75674	-0.009	0.03213	1.18579	0.03842	1.41763	0.00701	0.25882	0	0.156	0	5.75674	0.97195	0.26378	0.578758
ctx-lh-caudalmiddlefrontal	2.67703	0.14905	2.67983	0.14751	0.0028	0.10454	0.02113	0.78899	0.00386	0.14405	-0.046	0.054	-1.71742	2.01611	0	0.01393	0.52021	0.01593	0.59486	0.00291	0.10861	0	0.054	0	2.01611	0.99	0.47383	0.324379
ctx-lh-cuneus	1.91293	0.11604	1.91083	0.11812	-0.0021	-0.10984	0.02919	1.52662	0.00533	0.27872	-0.07	0.053	-3.66131	2.77214	-0.0005	0.02117	1.10711	0.01982	1.03686	0.00362	0.1893	0	0.07	0	3.66131	0.96979	0.6964	0.157141
ctx-lh-entorhinal	3.24803	0.41275	3.24447	0.40999	-0.00357	-0.10987	0.09429	2.90447	0.01721	0.53028	-0.251	0.183	-7.732	5.63727	0	0.06717	2.06905	0.06509	2.00495	0.01188	0.36605	0	0.251	0	7.732	0.97456	0.83731	0.0771133
ctx-lh-frontalpole	2.8841	0.27143	2.89797	0.26988	0.01387	0.47964	0.08938	3.0917	0.01632	0.56446	-0.154	0.271	-5.32682	9.37381	0	0.0596	2.06155	0.06718	2.32381	0.01227	0.42427	0	0.271	0	9.37381	0.94596	0.40243	0.395304
ctx-lh-fusiform	2.5003	0.19793	2.507	0.19612	0.0067	0.26761	0.03625	1.44797	0.00662	0.26436	-0.049	0.11	-1.95714	4.39359	0	0.02523	1.00786	0.02649	1.05825	0.00484	0.19321	0	0.11	0	4.39359	0.98306	0.31978	0.495157
ctx-lh-inferiorparietal	2.51637	0.14194	2.51987	0.14169	0.0035	0.13899	0.02295	0.91137	0.00419	0.16639	-0.031	0.083	-1.23108	3.29611	0	0.0147	0.58377	0.01777	0.70572	0.00324	0.12885	0	0.083	0	3.29611	0.98704	0.41036	0.38683
ctx-lh-inferiortemporal	2.53297	0.18733	2.541	0.17013	0.00803	0.31665	0.04329	1.70642	0.0079	0.31155	-0.052	0.11	-2.04967	4.33585	0	0.03103	1.22324	0.03074	1.21149	0.00561	0.22119	0	0.11	0	4.33585	0.9707	0.31786	0.497767
ctx-lh-insula	3.0325	0.17581	3.03627	0.17233	0.00377	0.12413	0.03544	1.16807	0.00647	0.21326	-0.089	0.073	-2.93305	2.40577	0	0.02523	0.83158	0.02474	0.81545	0.00452	0.14888	0	0.089	0	2.93305	0.97972	0.56501	0.247943
ctx-lh-isthmuscingulate	2.65817	0.20339	2.64303	0.2143	-0.01513	-0.57094	0.07169	2.70481	0.01309	0.49383	-0.221	0.11	-8.33773	4.15	0	0.04707	1.7757	0.05554	2.09556	0.01014	0.3826	0	0.221	0	8.33773	0.94047	0.25706	0.589972
ctx-lh-lateraloccipital	2.2002	0.09812	2.2005	0.10427	0.0003	0.01363	0.02835	1.28822	0.00518	0.2352	-0.053	0.076	-2.40871	3.45399	0	0.01837	0.83471	0.02132	0.96898	0.00389	0.17691	0	0.076	0	3.45399	0.96209	0.95417	0.0203728
ctx-lh-lateralorbitofrontal	2.67407	0.16422	2.679	0.16687	0.00493	0.18432	0.04055	1.51491	0.0074	0.27658	-0.088	0.114	-3.28784	4.25924	0	0.0272	1.01624	0.03006	1.12327	0.00549	0.20508	0	0.114	0	4.25924	0.97055	0.51042	0.292076
ctx-lh-lingual	1.96783	0.09538	1.96453	0.10096	-0.0033	-0.16784	0.02857	1.45329	0.00522	0.26533	-0.065	0.081	-3.30589	4.11966	0	0.01937	0.98499	0.02097	1.06655	0.00383	0.19473	0	0.081	0	4.11966	0.9585	0.53198	0.274105
ctx-lh-medialorbitofrontal	2.53183	0.15842	2.52913	0.16463	-0.0027	-0.1067	0.0465	1.83779	0.00849	0.33553	-0.136	0.087	-5.37446	3.43807	0	0.0305	1.2053	0.03476	1.37346	0.00635	0.25076	0	0.136	0	5.37446	0.95979	0.75276	0.12334
ctx-lh-middletemporal	2.7139	0.16864	2.7198	0.17677	0.0059	0.21716	0.04196	1.54459	0.00766	0.282	-0.07	0.096	-2.57652	3.5335	0	0.0313	1.15207	0.02799	1.03029	0.00511	0.18811	0	0.096	0	3.5335	0.97089	0.44748	0.349225
ctx-lh-paracentral	2.47183	0.13519	2.47297	0.13283	0.00113	0.04584	0.03955	1.59976	0.00722	0.29207	-0.125	0.091	-5.05582	3.68063	0	0.02653	1.07318	0.02894	1.17046	0.00528	0.2137	0	0.125	0	5.05582	0.95783	0.87638	0.0573095
ctx-lh-parahippocampal	2.61337	0.30582	2.5999	0.30928	-0.01347	-0.51663	0.06135	2.35377	0.0112	0.42974	-0.153	0.092	-5.86964	3.52946	0	0.0442	1.69567	0.04394	1.68579	0.00802	0.30778	0	0.153	0	5.86964	0.97981	0.23901	0.621584
ctx-lh-parsopercularis	2.6357	0.14486	2.6413	0.15249	0.0056	0.21224	0.02184	0.82758	0.00399	0.15109	-0.048	0.045	-1.81921	1.70552	0	0.01673	0.6342	0.01482	0.56162	0.00271	0.10254	0	0.048	0	1.81921	0.98887	0.17073	0.767676
ctx-lh-parsorbitalis	2.77707	0.24342	2.77413	0.23448	-0.00293	-0.10568	0.05169	1.86247	0.00944	0.34004	-0.149	0.152	-5.36821	5.4763	0	0.0348	1.25378	0.03779	1.36168	0.0069	0.24861	0	0.152	0	5.4763	0.9773	0.75818	0.12023
ctx-lh-parstriangularis	2.5682	0.20547	2.56247	0.19874	-0.00573	-0.22349	0.05276	2.05674	0.00963	0.37551	-0.145	0.088	-5.6523	3.43036	0	0.03573	1.39293	0.03869	1.50821	0.00706	0.27536	0	0.145	0	5.6523	0.96665	0.55634	0.254657
ctx-lh-pericalcarine	1.684	0.14819	1.70067	0.14272	0.01667	0.98483	0.05464	3.22868	0.00998	0.58947	-0.089	0.201	-5.25902	11.8771	0	0.03447	2.03664	0.04521	2.67148	0.00825	0.48774	0	0.201	0	11.8771	0.92541	0.10554	0.976576
ctx-lh-postcentral	2.23887	0.14244	2.2373	0.1421	-0.00157	-0.07	0.01673	0.74735	0.00305	0.13645	-0.033	0.04	-1.47448	1.78725	0	0.01163	0.51979	0.01193	0.53302	0.00218	0.09731	0	0.04	0	1.78725	0.99326	0.61182	0.213373
ctx-lh-posteriorcingulate	2.68903	0.15446	2.6831	0.15925	-0.00593	-0.22089	0.03314	1.23394	0.00605	0.22528	-0.062	0.118	-2.30821	4.39304	-0.0005	0.02193	0.81656	0.02524	0.93985	0.00461	0.17159	0	0.118	0	4.39304	0.97771	0.33495	0.475027
ctx-lh-precentral	2.62247	0.13085	2.6271	0.12711	0.00463	0.17652	0.02399	0.91384	0.00438	0.16684	-0.03	0.094	-1.14296	3.58125	0	0.01457	0.55497	0.01944	0.74076	0.00355	0.13524	0	0.094	0	3.58125	0.98264	0.29878	0.524641
ctx-lh-precuneus	2.4575	0.17291	2.46007	0.17639	0.00257	0.10439	0.01928	0.78411	0.00352	0.14316	-0.03	0.047	-1.22011	1.91151	0	0.01397	0.56803	0.01329	0.54066	0.00243	0.09871	0	0.047	0	1.91151	0.994	0.47174	0.326294
ctx-lh-rostralanteriorcingulate	2.8844	0.22057	2.8926	0.22453	0.0082	0.28388	0.05458	1.88939	0.00996	0.34495	-0.12	0.12	-4.1544	4.1544	0	0.03947	1.36634	0.0379	1.31222	0.00692	0.23958	0	0.12	0	4.1544	0.97025	0.41724	0.379608
ctx-lh-rostralmiddlefrontal	2.48333	0.13519	2.48953	0.13411	0.0062	0.24935	0.02335	0.93908	0.00426	0.17145	-0.049	0.071	-1.9707	2.85549	0.0045	0.0158	0.63545	0.01808	0.72696	0.0033	0.13272	0	0.071	0	2.85549	0.98441	0.15658	0.805256
ctx-lh-superiorfrontal	2.88247	0.15478	2.8837	0.15728	0.00123	0.04278	0.01951	0.67673	0.00356	0.12355	-0.033	0.046	-1.14461	1.59551	0	0.0135	0.46825	0.01392	0.48274	0.00254	0.08814	0	0.046	0	1.59551	0.99241	0.73167	0.135687
ctx-lh-superiorparietal	2.38307	0.15563	2.38447	0.15365	0.0014	0.05873	0.01712	0.71808	0.00313	0.1311	-0.033	0.047	-1.38436	1.97168	0	0.01173	0.49222	0.01235	0.51825	0.00226	0.09462	0	0.047	0	1.97168	0.99404	0.6575	0.182104
ctx-lh-superiortemporal	2.7956	0.17287	2.79737	0.1691	0.00177	0.06317	0.02895	1.03507	0.00528	0.18898	-0.046	0.07	-1.64492	2.50314	0	0.0205	0.73306	0.02016	0.72082	0.00368	0.1316	0	0.07	0	2.50314	0.98609	0.74056	0.13044
ctx-lh-supramarginal	2.5744	0.14562	2.57487	0.14607	0.00047	0.01813	0.02088	0.81106	0.00381	0.14808	-0.041	0.063	-1.59246	2.44695	0	0.01447	0.56189	0.01482	0.5758	0.00271	0.10513	0	0.063	0	2.44695	0.99009	0.90342	0.0441113
ctx-lh-temporalpole	3.59253	0.32854	3.6119	0.32825	0.01937	0.53763	0.08237	2.28663	0.01504	0.41748	-0.123	0.231	-3.41456	6.41272	0	0.05743	1.59439	0.06132	1.70234	0.0112	0.3108	0	0.231	0	6.41272	0.96786	0.208	0.681942
ctx-lh-transversetemporal	2.3329	0.18763	2.3379	0.19885	0.005	0.2141	0.04233	1.81238	0.00773	0.33089	-0.096	0.135	-4.11064	5.78059	0.0015	0.02773	1.18752	0.03196	1.36869	0.00584	0.24989	0	0.135	0	5.78059	0.97649	0.52271	0.281744
ctx-rh-bankssts	2.53087	0.18491	2.52943	0.18307	-0.00143	-0.05665	0.03342	1.32086	0.0061	0.24115	-0.121	0.047	-4.78233	1.85759	0	0.02137	0.84448	0.02543	1.00511	0.00464	0.18351	0	0.121	0	4.78233	0.98402	0.81593	0.0883485
ctx-rh-caudalanteriorcingulate	2.62503	0.21852	2.6069	0.2135	-0.01813	-0.69318	0.07555	2.88797	0.01379	0.52727	-0.295	0.108	-11.2769	4.12849	0	0.0456	1.74314	0.06242	2.38624	0.0114	0.43567	0	0.295	0	11.2769	0.93741	0.19893	0.701307
ctx-rh-caudalmiddlefrontal	2.67413	0.14471	2.67	0.14261	-0.00413	-0.15469	0.01791	0.67009	0.00327	0.12234	-0.04	0.029	-1.49697	1.0853	0	0.0134	0.50148	0.01235	0.46219	0.00225	0.08438	0	0.04	0	1.49697	0.99208	0.21616	0.665222
ctx-rh-cuneus	1.92607	0.11554	1.9217	0.11906	-0.00437	-0.22697	0.01693	0.88014	0.00309	0.16069	-0.041	0.034	-2.13111	1.76726	0	0.0123	0.63933	0.01225	0.63648	0.00224	0.1162	0	0.041	0	2.13111	0.98924	0.16846	0.773518
ctx-rh-entorhinal	3.3928	0.52427	3.37683	0.5164	-0.01597	-0.47172	0.1216	3.59257	0.0222	0.65591	-0.267	0.219	-7.88817	6.47007	0	0.0879	2.59689	0.08401	2.48201	0.01534	0.45315	0	0.267	0	7.88817	0.97313	0.47779	0.320766
ctx-rh-frontalpole	2.84427	0.2742	2.84873	0.30141	0.00447	0.15692	0.1139	4.00135	0.02079	0.73054	-0.253	0.288	-8.88811	10.1177	0	0.07607	2.67229	0.08371	2.94091	0.01528	0.53693	0	0.288	0	10.1177	0.92426	0.83143	0.0801751
ctx-rh-fusiform	2.5736	0.22292	2.5866	0.21426	0.013	0.50386	0.03572	1.3846	0.00652	0.25279	-0.056	0.087	-2.17046	3.37196	0.007	0.02613	1.01288	0.02729	1.05756	0.00498	0.19308	0	0.087	0	3.37196	0.98534	0.05573	1.25394
ctx-rh-inferiorparietal	2.5626	0.15567	2.56113	0.15179	-0.00147	-0.05725	0.02176	0.8492	0.00397	0.15504	-0.051	0.047	-1.99073	1.8346	0	0.01487	0.58031	0.01571	0.61332	0.00287	0.11198	0	0.051	0	1.99073	0.99027	0.71462	0.145927
ctx-rh-inferiortemporal	2.59667	0.23047	2.60207	0.22458	0.0054	0.20774	0.04979	1.9154	0.00909	0.3497	-0.132	0.126	-5.07816	4.84733	0	0.03327	1.2798	0.03694	1.42093	0.00674	0.25942	0	0.132	0	5.07816	0.97657	0.55708	0.25408
ctx-rh-insula	3.02083	0.15251	3.0108	0.14873	-0.01003	-0.33269	0.03528	1.16972	0.00644	0.21356	-0.078	0.092	-2.58636	3.05058	-0.005	0.02503	0.83007	0.02646	0.87748	0.00483	0.16021	0	0.092	0	3.05058	0.97129	0.13012	0.885648
ctx-rh-isthmuscingulate	2.6107	0.22888	2.6065	0.19873	-0.0042	-0.16101	0.07394	2.83465	0.0135	0.51753	-0.141	0.234	-5.4052	8.97033	0	0.0528	2.02407	0.05101	1.95548	0.00931	0.35702	0	0.234	0	8.97033	0.94223	0.75795	0.12036
ctx-rh-lateraloccipital	2.26537	0.1392	2.2686	0.13149	0.00323	0.14263	0.02564	1.13109	0.00468	0.20651	-0.06	0.075	-2.64669	3.30836	0	0.01643	0.7249	0.01972	0.86995	0.0036	0.15883	0	0.075	0	3.30836	0.98238	0.49527	0.305157
ctx-rh-lateralorbitofrontal	2.62107	0.1584	2.63007	0.15425	0.009	0.34278	0.03301	1.25737	0.00603	0.22956	-0.083	0.08	-3.16122	3.04696	0.0015	0.0228	0.86838	0.02522	0.96043	0.0046	0.17535	0	0.083	0	3.16122	0.9768	0.14619	0.835096
ctx-rh-lingual	1.97757	0.11164	1.97893	0.1176	0.00137	0.06908	0.02602	1.31547	0.00475	0.24017	-0.044	0.065	-2.22419	3.28574	0	0.01937	0.97898	0.01706	0.86252	0.00312	0.15747	0	0.065	0	3.28574	0.97502	0.77566	0.110328
ctx-rh-medialorbitofrontal	2.47453	0.17289	2.4689	0.15375	-0.00563	-0.22791	0.04615	1.86731	0.00843	0.34092	-0.077	0.153	-3.11524	6.19003	-0.0055	0.03257	1.31757	0.03265	1.32087	0.00596	0.24116	0	0.153	0	6.19003	0.96092	0.50909	0.293205
ctx-rh-middletemporal	2.74837	0.18001	2.74123	0.17144	-0.00713	-0.25989	0.03616	1.31738	0.0066	0.24052	-0.095	0.051	-3.46109	1.85806	0	0.02507	0.91324	0.02665	0.97087	0.00487	0.17726	0	0.095	0	3.46109	0.97872	0.28882	0.539381
ctx-rh-paracentral	2.51967	0.19106	2.51257	0.19071	-0.0071	-0.28218	0.02339	0.92946	0.00427	0.1697	-0.073	0.046	-2.9013	1.82821	-0.0035	0.01677	0.66637	0.01756	0.69779	0.00321	0.1274	0	0.073	0	2.9013	0.99206	0.10711	0.970157
ctx-rh-parahippocampal	2.56613	0.29234	2.56157	0.29951	-0.00457	-0.17812	0.10369	4.04416	0.01893	0.73836	-0.252	0.248	-9.82896	9.67295	0	0.07503	2.92659	0.07034	2.74367	0.01284	0.50092	0	0.252	0	9.82896	0.94049	0.81107	0.0909413
ctx-rh-parsopercularis	2.6946	0.17228	2.69697	0.17118	0.00237	0.08779	0.03027	1.12289	0.00553	0.20501	-0.054	0.063	-2.00313	2.33698	0	0.02077	0.77034	0.02182	0.8093	0.00398	0.14776	0	0.063	0	2.33698	0.98488	0.67165	0.172858
ctx-rh-parsorbitalis	2.79427	0.1914	2.77773	0.18978	-0.01653	-0.59344	0.06095	2.1878	0.01113	0.39944	-0.213	0.072	-7.64536	2.58435	0	0.04133	1.48361	0.04723	1.69522	0.00862	0.3095	0	0.213	0	7.64536	0.94686	0.14815	0.829307
ctx-rh-parstriangularis	2.59697	0.15851	2.59347	0.1578	-0.0035	-0.13486	0.03191	1.2297	0.00583	0.22451	-0.062	0.059	-2.389	2.27341	0	0.02443	0.94148	0.02034	0.78361	0.00371	0.14307	0	0.062	0	2.389	0.98007	0.55271	0.257506
ctx-rh-pericalcarine	1.66963	0.12395	1.66923	0.12462	-0.0004	-0.02396	0.02315	1.3865	0.00423	0.25314	-0.054	0.055	-3.23463	3.29454	0	0.0164	0.98237	0.01605	0.96158	0.00293	0.17556	0	0.055	0	3.29454	0.98323	0.92524	0.0337447
ctx-rh-postcentral	2.2218	0.13602	2.2196	0.13691	-0.0022	-0.09907	0.03396	1.52942	0.0062	0.27923	-0.146	0.056	-6.5745	2.52173	0	0.0176	0.79254	0.02895	1.30365	0.00529	0.23801	0	0.146	0	6.5745	0.96992	0.72532	0.139469
ctx-rh-posteriorcingulate	2.6709	0.16671	2.67227	0.16596	0.00137	0.05116	0.02725	1.01996	0.00497	0.18622	-0.064	0.046	-2.39558	1.72183	0	0.01917	0.71743	0.01909	0.71455	0.00349	0.13046	0	0.064	0	2.39558	0.98699	0.78549	0.10486
ctx-rh-precentral	2.61667	0.14643	2.6183	0.14237	0.00163	0.0624	0.01774	0.67792	0.00324	0.12377	-0.052	0.034	-1.98664	1.29896	0	0.01223	0.46737	0.01276	0.48747	0.00233	0.089	0	0.052	0	1.98664	0.99264	0.61795	0.209048
ctx-rh-precuneus	2.48783	0.17247	2.49087	0.17147	0.00303	0.12185	0.01779	0.71468	0.00325	0.13048	-0.046	0.044	-1.84787	1.76753	0	0.0117	0.47	0.01358	0.54553	0.00248	0.0996	0	0.046	0	1.84787	0.99467	0.35809	0.446012
ctx-rh-rostralanteriorcingulate	2.906	0.24281	2.90883	0.24331	0.00283	0.09745	0.06125	2.10675	0.01118	0.38464	-0.098	0.117	-3.37069	4.02419	0	0.0461	1.5856	0.03952	1.35919	0.00721	0.24815	0	0.117	0	4.02419	0.96922	0.80178	0.0959443
ctx-rh-rostralmiddlefrontal	2.46943	0.12185	2.46833	0.11743	-0.0011	-0.04455	0.019	0.76942	0.00347	0.14048	-0.037	0.046	-1.49866	1.86319	0	0.01317	0.53331	0.01352	0.54758	0.00247	0.09997	0	0.046	0	1.86319	0.98777	0.75339	0.122979
ctx-rh-superiorfrontal	2.8416	0.15218	2.83867	0.1507	-0.00293	-0.10328	0.01791	0.63066	0.00327	0.11514	-0.041	0.048	-1.44359	1.69006	0	0.01187	0.41782	0.01357	0.47767	0.00248	0.08721	0	0.048	0	1.69006	0.99305	0.37711	0.423537
ctx-rh-superiorparietal	2.39307	0.16608	2.39597	0.16693	0.0029	0.12111	0.01533	0.64019	0.0028	0.11688	-0.033	0.029	-1.37815	1.2111	0	0.01163	0.48583	0.01018	0.42525	0.00186	0.07764	0	0.033	0	1.37815	0.99575	0.30868	0.510491
ctx-rh-superiortemporal	2.8187	0.19663	2.81567	0.18965	-0.00303	-0.10767	0.02886	1.02428	0.00527	0.18701	-0.103	0.046	-3.65614	1.63284	0	0.0191	0.67798	0.02156	0.76526	0.00394	0.13972	0	0.103	0	3.65614	0.98909	0.56921	0.244725
ctx-rh-supramarginal	2.64537	0.16796	2.6505	0.16347	0.00513	0.19386	0.02413	0.91144	0.00441	0.16641	-0.051	0.059	-1.92603	2.22815	0	0.01793	0.67726	0.01664	0.62857	0.00304	0.11476	0	0.059	0	2.22815	0.98927	0.25351	0.595995
ctx-rh-temporalpole	3.5956	0.49905	3.63813	0.4575	0.04253	1.17597	0.14588	4.03334	0.02663	0.73638	-0.309	0.523	-8.54331	14.46	0.0015	0.09533	2.6358	0.11726	3.24214	0.02141	0.59193	0	0.523	0	14.46	0.95123	0.12112	0.916796
ctx-rh-transversetemporal	2.32073	0.23331	2.34583	0.23103	0.0251	1.07574	0.06241	2.67481	0.01139	0.48835	-0.091	0.192	-3.90008	8.22874	0.004	0.0453	1.94147	0.04923	2.11008	0.00899	0.38525	0	0.192	0	8.22874	0.95932	0.03571	1.44722
v4.3.1 vs. v5.0.0
Struct	Mean1	sd1	Mean2	sd2	Mean diff	Mean diff %	sd Diff	sd Diff %	se Diff	se Diff %	min Diff	max Diff	min Diff %	max Diff %	median	Mean AbsDiff	Mean AbsDiff %	sd AbsDiff	sd AbsDiff %	se AbsDiff	se AbsDiff %	min AbsDiff	max AbsDiff	min AbsDiff %	max AbsDiff %	ICC(1,1)	p	-log10(p)
ctx-lh-bankssts	2.3871	0.15497	2.3707	0.13697	-0.0164	-0.68939	0.11273	4.73879	0.02058	0.86518	-0.231	0.348	-9.71038	14.6286	-0.0445	0.08733	3.67116	0.07139	3.00094	0.01303	0.54789	0.015	0.348	0.63054	14.6286	0.70601	0.43203	0.364486
ctx-lh-caudalanteriorcingulate	2.715	0.21198	2.69853	0.20699	-0.01647	-0.60835	0.10194	3.76622	0.01861	0.68761	-0.208	0.248	-7.68444	9.16222	-0.0125	0.077	2.84472	0.06737	2.48913	0.0123	0.45445	0.004	0.248	0.14778	9.16222	0.88242	0.38358	0.416145
ctx-lh-caudalmiddlefrontal	2.67703	0.14905	2.6501	0.13525	-0.02693	-1.01118	0.05631	2.11415	0.01028	0.38599	-0.159	0.095	-5.96944	3.56665	-0.0405	0.053	1.98981	0.03187	1.19645	0.00582	0.21844	0.008	0.159	0.30035	5.96944	0.90713	0.01386	1.85835
ctx-lh-cuneus	1.91293	0.11604	1.90007	0.10546	-0.01287	-0.67488	0.06068	3.18303	0.01108	0.58114	-0.129	0.108	-6.76632	5.66483	-0.0185	0.05073	2.66107	0.03451	1.81035	0.0063	0.33052	0.008	0.129	0.41962	6.76632	0.84861	0.25499	0.593485
ctx-lh-entorhinal	3.24803	0.41275	3.2173	0.40772	-0.03073	-0.95071	0.19135	5.91924	0.03494	1.0807	-0.43	0.383	-13.3017	11.8478	-0.031	0.14293	4.42153	0.12829	3.96843	0.02342	0.72453	0.007	0.43	0.21654	13.3017	0.892	0.38624	0.41314
ctx-lh-frontalpole	2.8841	0.27143	2.8693	0.31128	-0.0148	-0.51448	0.13444	4.67328	0.02454	0.85322	-0.28	0.325	-9.73337	11.2977	-0.0115	0.10393	3.61294	0.08441	2.93427	0.01541	0.53572	0.009	0.325	0.31286	11.2977	0.89617	0.55121	0.258688
ctx-lh-fusiform	2.5003	0.19793	2.50263	0.16389	0.00233	0.09328	0.06893	2.75562	0.01259	0.50311	-0.155	0.143	-6.19636	5.71664	0.0005	0.0484	1.93486	0.04831	1.93123	0.00882	0.35259	0.003	0.155	0.11993	6.19636	0.93028	0.8542	0.0684405
ctx-lh-inferiorparietal	2.51637	0.14194	2.49303	0.12432	-0.02333	-0.93158	0.04837	1.93129	0.00883	0.3526	-0.119	0.085	-4.75107	3.39362	-0.022	0.04167	1.66354	0.03327	1.32848	0.00608	0.24255	0	0.119	0	4.75107	0.92169	0.01314	1.88126
ctx-lh-inferiortemporal	2.53297	0.18733	2.5887	0.16732	0.05573	2.17638	0.07405	2.89172	0.01352	0.52795	-0.145	0.217	-5.66222	8.4738	0.055	0.07633	2.9808	0.05167	2.01753	0.00943	0.36835	0.003	0.217	0.11715	8.4738	0.86976	0.00029	3.54248
ctx-lh-insula	3.0325	0.17581	2.97203	0.16584	-0.06047	-2.01403	0.08634	2.8759	0.01576	0.52506	-0.26	0.085	-8.66012	2.8312	-0.0545	0.08387	2.79345	0.06294	2.09632	0.01149	0.38273	0.007	0.26	0.23316	8.66012	0.8193	0.00062	3.20502
ctx-lh-isthmuscingulate	2.65817	0.20339	2.5241	0.21403	-0.13407	-5.17406	0.10353	3.99553	0.0189	0.72948	-0.36	0.057	-13.8935	2.19981	-0.134	0.14153	5.46222	0.09268	3.57681	0.01692	0.65303	0.007	0.36	0.27015	13.8935	0.7048	0	7.22472
ctx-lh-lateraloccipital	2.2002	0.09812	2.1899	0.08604	-0.0103	-0.46924	0.05211	2.37377	0.00951	0.43339	-0.176	0.066	-8.01805	3.00676	-0.009	0.03843	1.75091	0.03601	1.64048	0.00657	0.29951	0.004	0.176	0.18223	8.01805	0.83974	0.28786	0.540827
ctx-lh-lateralorbitofrontal	2.67407	0.16422	2.64203	0.1641	-0.03203	-1.20514	0.07021	2.64155	0.01282	0.48228	-0.205	0.096	-7.71242	3.61168	-0.034	0.05937	2.23347	0.04843	1.82205	0.00884	0.33266	0.006	0.205	0.22573	7.71242	0.89339	0.01837	1.7358
ctx-lh-lingual	1.96783	0.09538	1.93597	0.0924	-0.03187	-1.6326	0.05904	3.02495	0.01078	0.55228	-0.196	0.07	-10.0415	3.58625	-0.028	0.04993	2.55819	0.04424	2.26662	0.00808	0.41383	0.006	0.196	0.30739	10.0415	0.75751	0.00613	2.21228
ctx-lh-medialorbitofrontal	2.53183	0.15842	2.47397	0.13092	-0.05787	-2.31198	0.09232	3.68851	0.01686	0.67343	-0.225	0.13	-8.98957	5.19397	-0.0595	0.0876	3.49994	0.06363	2.54219	0.01162	0.46414	0.009	0.225	0.35958	8.98957	0.73527	0.00182	2.74081
ctx-lh-middletemporal	2.7139	0.16864	2.72777	0.14746	0.01387	0.50965	0.09248	3.39886	0.01688	0.62054	-0.162	0.286	-5.95406	10.5115	0	0.06407	2.35467	0.06712	2.46684	0.01225	0.45038	0.003	0.286	0.11025	10.5115	0.83128	0.41818	0.378635
ctx-lh-paracentral	2.47183	0.13519	2.46343	0.13209	-0.0084	-0.34041	0.04453	1.80454	0.00813	0.32946	-0.102	0.06	-4.13352	2.43148	0.004	0.03487	1.41296	0.02825	1.14496	0.00516	0.20904	0.003	0.102	0.12157	4.13352	0.94437	0.31004	0.508581
ctx-lh-parahippocampal	2.61337	0.30582	2.61173	0.30963	-0.00163	-0.06252	0.11062	4.23415	0.0202	0.77305	-0.239	0.221	-9.14814	8.45917	0.0085	0.08717	3.33646	0.06618	2.53304	0.01208	0.46247	0.005	0.239	0.19139	9.14814	0.93746	0.9361	0.0286808
ctx-lh-parsopercularis	2.6357	0.14486	2.6291	0.14424	-0.0066	-0.25072	0.07115	2.70286	0.01299	0.49347	-0.176	0.115	-6.68591	4.36864	0.001	0.0576	2.18812	0.04093	1.55483	0.00747	0.28387	0.004	0.176	0.15195	6.68591	0.88168	0.61524	0.210954
ctx-lh-parsorbitalis	2.77707	0.24342	2.74653	0.22792	-0.03053	-1.10556	0.10483	3.79562	0.01914	0.69298	-0.384	0.158	-13.904	5.72091	-0.014	0.07333	2.65527	0.07994	2.8944	0.01459	0.52844	0.005	0.384	0.18105	13.904	0.89636	0.12147	0.915523
ctx-lh-parstriangularis	2.5682	0.20547	2.55973	0.19832	-0.00847	-0.33022	0.08835	3.44594	0.01613	0.62914	-0.19	0.138	-7.41039	5.38229	0.0055	0.06973	2.71974	0.05338	2.08211	0.00975	0.38014	0.001	0.19	0.039	7.41039	0.90648	0.60366	0.219206
ctx-lh-pericalcarine	1.684	0.14819	1.6737	0.11324	-0.0103	-0.61352	0.0831	4.94959	0.01517	0.90367	-0.259	0.163	-15.4272	9.70903	-0.008	0.05983	3.56395	0.05754	3.42755	0.01051	0.62578	0	0.259	0	15.4272	0.8047	0.50257	0.298799
ctx-lh-postcentral	2.23887	0.14244	2.2042	0.14222	-0.03467	-1.56048	0.05648	2.54243	0.01031	0.46418	-0.208	0.032	-9.3629	1.44045	-0.023	0.0456	2.05264	0.04777	2.15045	0.00872	0.39262	0.004	0.208	0.18005	9.3629	0.89564	0.00219	2.66007
ctx-lh-posteriorcingulate	2.68903	0.15446	2.68197	0.15774	-0.00707	-0.26314	0.06466	2.4076	0.0118	0.43957	-0.143	0.141	-5.32489	5.25042	-0.0075	0.0488	1.81717	0.04205	1.56595	0.00768	0.2859	0	0.143	0	5.32489	0.91599	0.55406	0.256442
ctx-lh-precentral	2.62247	0.13085	2.61103	0.1471	-0.01143	-0.43693	0.04168	1.59297	0.00761	0.29084	-0.127	0.066	-4.85334	2.52222	-0.0035	0.03103	1.18595	0.02961	1.1314	0.00541	0.20657	0.002	0.127	0.07643	4.85334	0.95333	0.14383	0.842158
ctx-lh-precuneus	2.4575	0.17291	2.43583	0.17179	-0.02167	-0.88556	0.03019	1.2339	0.00551	0.22528	-0.094	0.036	-3.84197	1.47138	-0.0175	0.02867	1.17166	0.02339	0.95584	0.00427	0.17451	0.001	0.094	0.04087	3.84197	0.97735	0.00048	3.31661
ctx-lh-rostralanteriorcingulate	2.8844	0.22057	2.8453	0.22368	-0.0391	-1.36482	0.11115	3.87978	0.02029	0.70835	-0.337	0.265	-11.7633	9.25005	-0.0595	0.08997	3.14036	0.07458	2.60341	0.01362	0.47531	0.01	0.337	0.34906	11.7633	0.86425	0.06386	1.19478
ctx-lh-rostralmiddlefrontal	2.48333	0.13519	2.4644	0.13014	-0.01893	-0.76533	0.0521	2.1062	0.00951	0.38454	-0.14	0.059	-5.65916	2.38493	-0.0195	0.04493	1.81632	0.03158	1.27642	0.00577	0.23304	0.003	0.14	0.12127	5.65916	0.91562	0.05606	1.25133
ctx-lh-superiorfrontal	2.88247	0.15478	2.8631	0.15872	-0.01937	-0.67414	0.03997	1.3914	0.0073	0.25403	-0.099	0.048	-3.44613	1.67086	-0.021	0.03597	1.25198	0.02545	0.8858	0.00465	0.16172	0.001	0.099	0.03482	3.44613	0.96107	0.01278	1.89335
ctx-lh-superiorparietal	2.38307	0.15563	2.3486	0.15548	-0.03447	-1.45685	0.03329	1.40696	0.00608	0.25687	-0.091	0.018	-3.84643	0.76083	-0.028	0.0366	1.54702	0.03084	1.30358	0.00563	0.238	0	0.091	0	3.84643	0.95387	0	5.40518
ctx-lh-superiortemporal	2.7956	0.17287	2.80077	0.15284	0.00517	0.18464	0.05677	2.02871	0.01036	0.37039	-0.072	0.195	-2.5731	6.9688	-0.0075	0.04043	1.44499	0.03948	1.41101	0.00721	0.25761	0.002	0.195	0.07147	6.9688	0.94095	0.62188	0.20629
ctx-lh-supramarginal	2.5744	0.14562	2.57047	0.1416	-0.00393	-0.1529	0.04425	1.72034	0.00808	0.31409	-0.072	0.093	-2.7989	3.61525	-0.0045	0.0352	1.36835	0.02632	1.02314	0.00481	0.1868	0	0.093	0	3.61525	0.95371	0.63005	0.200627
ctx-lh-temporalpole	3.59253	0.32854	3.59723	0.2966	0.0047	0.13074	0.15619	4.3448	0.02852	0.79325	-0.29	0.409	-8.06702	11.3773	0.029	0.12503	3.47809	0.09081	2.526	0.01658	0.46118	0.018	0.409	0.50071	11.3773	0.87927	0.87023	0.0603669
ctx-lh-transversetemporal	2.3329	0.18763	2.33223	0.1846	-0.00067	-0.02858	0.07772	3.33204	0.01419	0.60834	-0.247	0.134	-10.5892	5.74475	0.0045	0.05587	2.39507	0.05303	2.27358	0.00968	0.4151	0.006	0.247	0.25723	10.5892	0.91559	0.96285	0.0164424
ctx-rh-bankssts	2.53087	0.18491	2.5341	0.19092	0.00323	0.12767	0.08918	3.52151	0.01628	0.64294	-0.158	0.273	-6.23894	10.7799	-0.009	0.06323	2.49689	0.06187	2.44304	0.0113	0.44604	0.005	0.273	0.19743	10.7799	0.89082	0.84398	0.0736694
ctx-rh-caudalanteriorcingulate	2.62503	0.21852	2.58883	0.2137	-0.0362	-1.38861	0.1053	4.03929	0.01923	0.73747	-0.254	0.225	-9.74325	8.63083	-0.033	0.08727	3.34748	0.06757	2.59202	0.01234	0.47324	0.003	0.254	0.11507	9.74325	0.87188	0.06978	1.15629
ctx-rh-caudalmiddlefrontal	2.67413	0.14471	2.64603	0.1444	-0.0281	-1.05636	0.04641	1.74451	0.00847	0.3185	-0.166	0.04	-6.2404	1.50371	-0.0205	0.03837	1.44231	0.03805	1.43028	0.00695	0.26113	0	0.166	0	6.2404	0.93188	0.00246	2.60925
ctx-rh-cuneus	1.92607	0.11554	1.90027	0.1085	-0.0258	-1.34855	0.05431	2.83897	0.00992	0.51832	-0.151	0.089	-7.89267	4.65198	-0.0245	0.0474	2.47757	0.03625	1.895	0.00662	0.34598	0.001	0.151	0.05227	7.89267	0.86155	0.01445	1.83999
ctx-rh-entorhinal	3.3928	0.52427	3.3984	0.41928	0.0056	0.16492	0.2639	7.77178	0.04818	1.41893	-0.534	0.696	-15.7262	20.4971	-0.016	0.2022	5.95476	0.16547	4.87306	0.03021	0.8897	0.003	0.696	0.08834	20.4971	0.85017	0.90827	0.0417835
ctx-rh-frontalpole	2.84427	0.2742	2.83287	0.26695	-0.0114	-0.40161	0.15269	5.37914	0.02788	0.98209	-0.326	0.339	-11.4847	11.9427	-0.056	0.1256	4.42477	0.08444	2.97461	0.01542	0.54309	0.013	0.339	0.45798	11.9427	0.84488	0.68559	0.163933
ctx-rh-fusiform	2.5736	0.22292	2.54957	0.17703	-0.02403	-0.93822	0.07523	2.93677	0.01373	0.53618	-0.186	0.147	-7.26114	5.73864	-0.0175	0.05637	2.20046	0.0545	2.12749	0.00995	0.38842	0.003	0.186	0.11712	7.26114	0.92554	0.09072	1.04228
ctx-rh-inferiorparietal	2.5626	0.15567	2.54473	0.13954	-0.01787	-0.69965	0.04005	1.56849	0.00731	0.28637	-0.104	0.07	-4.07258	2.74115	-0.0255	0.03607	1.41235	0.02427	0.95028	0.00443	0.1735	0.002	0.104	0.07832	4.07258	0.95734	0.02088	1.68025
ctx-rh-inferiortemporal	2.59667	0.23047	2.6107	0.19591	0.01403	0.53898	0.0875	3.36065	0.01598	0.61357	-0.178	0.234	-6.83647	8.98727	0.022	0.06863	2.63601	0.05465	2.09913	0.00998	0.38325	0.007	0.234	0.26885	8.98727	0.91693	0.38693	0.412371
ctx-rh-insula	3.02083	0.15251	2.91677	0.16117	-0.10407	-3.50534	0.10248	3.45184	0.01871	0.63022	-0.253	0.074	-8.52196	2.49259	-0.11	0.11727	3.94997	0.08648	2.91309	0.01579	0.53185	0	0.253	0	8.52196	0.61484	1e-05	5.27533
ctx-rh-isthmuscingulate	2.6107	0.22888	2.4838	0.23348	-0.1269	-4.98184	0.13282	5.21427	0.02425	0.95199	-0.302	0.202	-11.8559	7.93013	-0.163	0.1637	6.42654	0.08111	3.18412	0.01481	0.58134	0.025	0.302	0.98145	11.8559	0.71082	1e-05	4.87641
ctx-rh-lateraloccipital	2.26537	0.1392	2.26243	0.10802	-0.00293	-0.12957	0.07462	3.29614	0.01362	0.60179	-0.175	0.218	-7.73002	9.6294	-0.007	0.05267	2.32637	0.05204	2.29854	0.0095	0.41965	0	0.218	0	9.6294	0.82583	0.83103	0.0803792
ctx-rh-lateralorbitofrontal	2.62107	0.1584	2.56477	0.14649	-0.0563	-2.1713	0.08784	3.3878	0.01604	0.61852	-0.36	0.057	-13.884	2.19829	-0.053	0.07637	2.9452	0.07044	2.71679	0.01286	0.49602	0.004	0.36	0.15426	13.884	0.77859	0.00148	2.82882
ctx-rh-lingual	1.97757	0.11164	1.95507	0.08614	-0.0225	-1.14427	0.06795	3.45573	0.01241	0.63093	-0.14	0.088	-7.11992	4.47537	-0.028	0.06117	3.11072	0.03565	1.81282	0.00651	0.33097	0.012	0.14	0.61028	7.11992	0.75225	0.0801	1.09639
ctx-rh-medialorbitofrontal	2.47453	0.17289	2.4554	0.1467	-0.01913	-0.77621	0.08061	3.27035	0.01472	0.59708	-0.124	0.16	-5.0305	6.49096	-0.0335	0.0688	2.79111	0.0445	1.80542	0.00813	0.32962	0	0.16	0	6.49096	0.87088	0.20384	0.690715
ctx-rh-middletemporal	2.74837	0.18001	2.74673	0.15384	-0.00163	-0.05945	0.08319	3.02772	0.01519	0.55278	-0.143	0.22	-5.20464	8.00713	-0.0205	0.06203	2.25777	0.05424	1.97419	0.0099	0.36044	0.001	0.22	0.03639	8.00713	0.8804	0.9151	0.0385306
ctx-rh-paracentral	2.51967	0.19106	2.49927	0.18073	-0.0204	-0.81292	0.06531	2.60239	0.01192	0.47513	-0.166	0.097	-6.61496	3.86537	-0.0065	0.0532	2.11997	0.04204	1.67534	0.00768	0.30587	0.002	0.166	0.0797	6.61496	0.93451	0.09777	1.0098
ctx-rh-parahippocampal	2.56613	0.29234	2.55413	0.28718	-0.012	-0.46872	0.13411	5.23844	0.02449	0.9564	-0.282	0.169	-11.0151	6.60122	-0.014	0.1146	4.47633	0.06744	2.6344	0.01231	0.48097	0.005	0.282	0.19531	11.0151	0.89547	0.62776	0.202208
ctx-rh-parsopercularis	2.6946	0.17228	2.66003	0.17836	-0.03457	-1.29109	0.06245	2.33243	0.0114	0.42584	-0.187	0.062	-6.98461	2.31575	-0.028	0.05497	2.05305	0.04483	1.67459	0.00819	0.30574	0.001	0.187	0.03735	6.98461	0.91996	0.00508	2.2943
ctx-rh-parsorbitalis	2.79427	0.1914	2.7641	0.19773	-0.03017	-1.08545	0.08576	3.08594	0.01566	0.56341	-0.255	0.109	-9.17536	3.92201	-0.0225	0.06863	2.46955	0.05851	2.10544	0.01068	0.3844	0.003	0.255	0.10795	9.17536	0.89456	0.06389	1.1946
ctx-rh-parstriangularis	2.59697	0.15851	2.55963	0.14915	-0.03733	-1.44798	0.04684	1.81657	0.00855	0.33166	-0.132	0.062	-5.11965	2.40469	-0.0415	0.04913	1.90565	0.03374	1.3085	0.00616	0.2389	0.007	0.132	0.2715	5.11965	0.92683	0.00015	3.83273
ctx-rh-pericalcarine	1.66963	0.12395	1.64673	0.07835	-0.0229	-1.38103	0.0912	5.5001	0.01665	1.00418	-0.217	0.233	-13.0866	14.0515	-0.0385	0.07123	4.29587	0.06009	3.62398	0.01097	0.66165	0.001	0.233	0.0603	14.0515	0.60396	0.17957	0.745757
ctx-rh-postcentral	2.2218	0.13602	2.19213	0.11852	-0.02967	-1.34423	0.04535	2.0549	0.00828	0.37517	-0.136	0.066	-6.1623	2.99053	-0.019	0.03933	1.78224	0.03697	1.67511	0.00675	0.30583	0.001	0.136	0.04531	6.1623	0.91297	0.00122	2.91191
ctx-rh-posteriorcingulate	2.6709	0.16671	2.62587	0.16381	-0.04503	-1.70041	0.06414	2.42202	0.01171	0.4422	-0.19	0.062	-7.17418	2.34105	-0.0325	0.0593	2.2391	0.05074	1.91594	0.00926	0.3498	0.005	0.19	0.18879	7.17418	0.89193	0.00061	3.21621
ctx-rh-precentral	2.61667	0.14643	2.5898	0.15356	-0.02687	-1.03205	0.06692	2.57052	0.01222	0.46931	-0.272	0.074	-10.4485	2.84262	-0.025	0.0492	1.88996	0.05216	2.00358	0.00952	0.3658	0.001	0.272	0.03841	10.4485	0.88853	0.036	1.44371
ctx-rh-precuneus	2.48783	0.17247	2.471	0.16297	-0.01683	-0.67892	0.03189	1.28606	0.00582	0.2348	-0.083	0.037	-3.34757	1.49229	-0.008	0.0273	1.10107	0.02321	0.93628	0.00424	0.17094	0.001	0.083	0.04033	3.34757	0.97756	0.0072	2.14293
ctx-rh-rostralanteriorcingulate	2.906	0.24281	2.802	0.2258	-0.104	-3.64401	0.14329	5.0207	0.02616	0.91665	-0.41	0.198	-14.3658	6.93763	-0.098	0.14207	4.97781	0.10413	3.64844	0.01901	0.66611	0.011	0.41	0.38542	14.3658	0.73338	0.00043	3.36884
ctx-rh-rostralmiddlefrontal	2.46943	0.12185	2.43213	0.10988	-0.0373	-1.52196	0.04821	1.9671	0.0088	0.35914	-0.133	0.083	-5.42683	3.38667	-0.025	0.04757	1.94088	0.03772	1.5391	0.00689	0.281	0.002	0.133	0.08161	5.42683	0.86809	0.00021	3.67979
ctx-rh-superiorfrontal	2.8416	0.15218	2.8183	0.15434	-0.0233	-0.82334	0.0385	1.36046	0.00703	0.24839	-0.082	0.074	-2.89758	2.61488	-0.026	0.03637	1.28506	0.026	0.91858	0.00475	0.16771	0.001	0.082	0.03533	2.89758	0.95817	0.00247	2.60714
ctx-rh-superiorparietal	2.39307	0.16608	2.36557	0.1608	-0.0275	-1.15579	0.03702	1.55578	0.00676	0.28405	-0.109	0.036	-4.58115	1.51304	-0.023	0.03503	1.47241	0.02971	1.24885	0.00543	0.22801	0.001	0.109	0.04203	4.58115	0.96132	0.00033	3.47941
ctx-rh-superiortemporal	2.8187	0.19663	2.82423	0.19094	0.00553	0.19612	0.04464	1.58224	0.00815	0.28888	-0.075	0.148	-2.65819	5.2455	-0.0045	0.03347	1.18614	0.02943	1.04299	0.00537	0.19042	0.003	0.148	0.10633	5.2455	0.97394	0.50259	0.298786
ctx-rh-supramarginal	2.64537	0.16796	2.63027	0.16125	-0.0151	-0.57244	0.04221	1.60003	0.00771	0.29212	-0.127	0.062	-4.81458	2.35043	-0.009	0.0309	1.17142	0.03209	1.21636	0.00586	0.22208	0.002	0.127	0.07581	4.81458	0.96409	0.05972	1.22389
ctx-rh-temporalpole	3.5956	0.49905	3.69337	0.30431	0.09777	2.68259	0.3786	10.3883	0.06912	1.89664	-0.846	0.977	-23.2132	26.8076	0.045	0.2575	7.06547	0.29092	7.98246	0.05311	1.45739	0.006	0.977	0.16463	26.8076	0.56948	0.16789	0.774964
ctx-rh-transversetemporal	2.32073	0.23331	2.37517	0.25508	0.05443	2.31833	0.10989	4.6803	0.02006	0.8545	-0.14	0.286	-5.96265	12.1808	0.053	0.09683	4.12417	0.07376	3.14165	0.01347	0.57358	0.019	0.286	0.80922	12.1808	0.87882	0.0111	1.95479
v4.5.0 vs. v5.0.0
Struct	Mean1	sd1	Mean2	sd2	Mean diff	Mean diff %	sd Diff	sd Diff %	se Diff	se Diff %	min Diff	max Diff	min Diff %	max Diff %	median	Mean AbsDiff	Mean AbsDiff %	sd AbsDiff	sd AbsDiff %	se AbsDiff	se AbsDiff %	min AbsDiff	max AbsDiff	min AbsDiff %	max AbsDiff %	ICC(1,1)	p	-log10(p)
ctx-lh-bankssts	2.39027	0.15572	2.3707	0.13697	-0.01957	-0.82196	0.10866	4.56458	0.01984	0.83337	-0.231	0.316	-9.70392	13.2746	-0.042	0.0841	3.5329	0.0699	2.93642	0.01276	0.53612	0.004	0.316	0.16804	13.2746	0.7257	0.33214	0.478675
ctx-lh-caudalanteriorcingulate	2.70473	0.20669	2.69853	0.20699	-0.0062	-0.22949	0.09308	3.44519	0.01699	0.629	-0.203	0.246	-7.51397	9.1056	-0.0035	0.06633	2.4553	0.06443	2.38482	0.01176	0.43541	0.003	0.246	0.11104	9.1056	0.90153	0.71787	0.143951
ctx-lh-caudalmiddlefrontal	2.67983	0.14751	2.6501	0.13525	-0.02973	-1.11571	0.05871	2.20297	0.01072	0.40221	-0.133	0.114	-4.99069	4.27773	-0.0405	0.05547	2.08133	0.03433	1.28823	0.00627	0.2352	0.005	0.133	0.18761	4.99069	0.89574	0.00958	2.01846
ctx-lh-cuneus	1.91083	0.11812	1.90007	0.10546	-0.01077	-0.56505	0.06127	3.21556	0.01119	0.58708	-0.112	0.129	-5.87788	6.77006	-0.0115	0.0497	2.60831	0.03631	1.90584	0.00663	0.34796	0.003	0.129	0.15744	6.77006	0.85063	0.34377	0.463731
ctx-lh-entorhinal	3.24447	0.40999	3.2173	0.40772	-0.02717	-0.84084	0.20586	6.3717	0.03759	1.16331	-0.368	0.4	-11.3901	12.3805	-0.058	0.17823	5.51655	0.10139	3.13819	0.01851	0.57295	0.024	0.4	0.74283	12.3805	0.87513	0.47559	0.322768
ctx-lh-frontalpole	2.89797	0.26988	2.8693	0.31128	-0.02867	-0.99412	0.14547	5.04477	0.02656	0.92104	-0.374	0.253	-12.9697	8.77365	-0.0215	0.11027	3.82388	0.09713	3.36835	0.01773	0.61497	0.009	0.374	0.31211	12.9697	0.87468	0.28933	0.538603
ctx-lh-fusiform	2.507	0.19612	2.50263	0.16389	-0.00437	-0.17433	0.06698	2.674	0.01223	0.4882	-0.157	0.145	-6.26793	5.78885	-0.0025	0.0489	1.95224	0.04508	1.79974	0.00823	0.32859	0.001	0.157	0.03992	6.26793	0.93325	0.72361	0.140494
ctx-lh-inferiorparietal	2.51987	0.14169	2.49303	0.12432	-0.02683	-1.07057	0.05081	2.02709	0.00928	0.37009	-0.15	0.048	-5.98456	1.91505	-0.021	0.04283	1.70892	0.03779	1.50785	0.0069	0.27529	0.002	0.15	0.0798	5.98456	0.91031	0.00717	2.14423
ctx-lh-inferiortemporal	2.541	0.17013	2.5887	0.16732	0.0477	1.85976	0.06817	2.65802	0.01245	0.48529	-0.098	0.157	-3.82089	6.12122	0.0615	0.06997	2.7279	0.04402	1.7161	0.00804	0.31331	0.002	0.157	0.07797	6.12122	0.88331	0.00063	3.20093
ctx-lh-insula	3.03627	0.17233	2.97203	0.16584	-0.06423	-2.13815	0.09074	3.02034	0.01657	0.55144	-0.28	0.091	-9.32044	3.02915	-0.0445	0.08337	2.77505	0.07288	2.42597	0.01331	0.44292	0.003	0.28	0.09986	9.32044	0.79562	0.00056	3.25377
ctx-lh-isthmuscingulate	2.64303	0.2143	2.5241	0.21403	-0.11893	-4.60346	0.09036	3.49748	0.0165	0.63855	-0.293	0.094	-11.3409	3.63838	-0.125	0.12647	4.89504	0.07907	3.0606	0.01444	0.55879	0.016	0.293	0.6193	11.3409	0.77665	0	7.22472
ctx-lh-lateraloccipital	2.2005	0.10427	2.1899	0.08604	-0.0106	-0.48287	0.05183	2.36093	0.00946	0.43104	-0.176	0.054	-8.0175	2.45991	-0.006	0.03913	1.78268	0.0349	1.58986	0.00637	0.29027	0.004	0.176	0.18222	8.0175	0.85186	0.27181	0.565742
ctx-lh-lateralorbitofrontal	2.679	0.16687	2.64203	0.1641	-0.03697	-1.38946	0.07227	2.71628	0.01319	0.49592	-0.196	0.096	-7.36699	3.60833	-0.0285	0.0619	2.32662	0.0517	1.94307	0.00944	0.35475	0	0.196	0	7.36699	0.88415	0.00896	2.04769
ctx-lh-lingual	1.96453	0.10096	1.93597	0.0924	-0.02857	-1.46477	0.06148	3.15238	0.01122	0.57554	-0.196	0.079	-10.05	4.05076	-0.0085	0.05037	2.58257	0.04472	2.29289	0.00816	0.41862	0.004	0.196	0.2051	10.05	0.76569	0.01651	1.78231
ctx-lh-medialorbitofrontal	2.52913	0.16463	2.47397	0.13092	-0.05517	-2.2053	0.10634	4.25093	0.01941	0.77611	-0.268	0.123	-10.7134	4.91695	-0.0435	0.09483	3.79098	0.07178	2.86955	0.01311	0.52391	0.004	0.268	0.1599	10.7134	0.69339	0.00813	2.0897
ctx-lh-middletemporal	2.7198	0.17677	2.72777	0.14746	0.00797	0.29249	0.09672	3.55087	0.01766	0.6483	-0.18	0.232	-6.60846	8.51756	-0.0005	0.07063	2.59321	0.06526	2.39595	0.01191	0.43744	0.001	0.232	0.03671	8.51756	0.82777	0.65523	0.183607
ctx-lh-paracentral	2.47297	0.13283	2.46343	0.13209	-0.00953	-0.38625	0.0499	2.02173	0.00911	0.36912	-0.132	0.069	-5.34803	2.79556	-0.007	0.0402	1.62872	0.0302	1.22374	0.00551	0.22342	0.002	0.132	0.08103	5.34803	0.92883	0.30402	0.517101
ctx-lh-parahippocampal	2.5999	0.30928	2.61173	0.30963	0.01183	0.45411	0.09929	3.81023	0.01813	0.69565	-0.216	0.221	-8.28915	8.48102	0.035	0.07957	3.05342	0.05877	2.25527	0.01073	0.41175	0.005	0.221	0.19188	8.48102	0.94949	0.51903	0.284806
ctx-lh-parsopercularis	2.6413	0.15249	2.6291	0.14424	-0.0122	-0.46296	0.07129	2.70514	0.01301	0.49389	-0.176	0.112	-6.67881	4.25015	-0.01	0.05933	2.25157	0.03992	1.51497	0.00729	0.2766	0	0.176	0	6.67881	0.8851	0.3563	0.448179
ctx-lh-parsorbitalis	2.77413	0.23448	2.74653	0.22792	-0.0276	-0.99988	0.10011	3.62658	0.01828	0.66212	-0.394	0.104	-14.2736	3.76766	-0.008	0.0658	2.38377	0.07956	2.88236	0.01453	0.52624	0	0.394	0	14.2736	0.90248	0.14183	0.848225
ctx-lh-parstriangularis	2.56247	0.19874	2.55973	0.19832	-0.00273	-0.10672	0.07837	3.06006	0.01431	0.55869	-0.148	0.128	-5.77877	4.99785	0.0085	0.06473	2.52756	0.0426	1.66341	0.00778	0.3037	0.001	0.148	0.03904	5.77877	0.92449	0.84984	0.0706641
ctx-lh-pericalcarine	1.70067	0.14272	1.6737	0.11324	-0.02697	-1.59832	0.07705	4.56698	0.01407	0.83381	-0.259	0.153	-15.351	9.06837	-0.0135	0.0535	3.17096	0.06106	3.61915	0.01115	0.66076	0	0.259	0	15.351	0.80671	0.06515	1.18607
ctx-lh-postcentral	2.2373	0.1421	2.2042	0.14222	-0.0331	-1.49049	0.04911	2.21159	0.00897	0.40378	-0.175	0.037	-7.88022	1.66611	-0.026	0.04043	1.82071	0.04306	1.93907	0.00786	0.35402	0.001	0.175	0.04504	7.88022	0.91626	0.00092	3.03695
ctx-lh-posteriorcingulate	2.6831	0.15925	2.68197	0.15774	-0.00113	-0.04225	0.05443	2.02912	0.00994	0.37046	-0.14	0.106	-5.21895	3.9515	-0.003	0.04293	1.60048	0.03252	1.21215	0.00594	0.22131	0	0.14	0	5.21895	0.94291	0.90999	0.0409627
ctx-lh-precentral	2.6271	0.12711	2.61103	0.1471	-0.01607	-0.61345	0.04381	1.67258	0.008	0.30537	-0.129	0.053	-4.92543	2.02363	-0.0095	0.0344	1.31345	0.03101	1.18414	0.00566	0.21619	0	0.129	0	4.92543	0.94423	0.05394	1.26808
ctx-lh-precuneus	2.46007	0.17639	2.43583	0.17179	-0.02423	-0.98994	0.03443	1.40653	0.00629	0.2568	-0.086	0.045	-3.51314	1.83828	-0.0265	0.0349	1.42568	0.02309	0.9431	0.00422	0.17219	0.006	0.086	0.2451	3.51314	0.97154	0.00059	3.22751
ctx-lh-rostralanteriorcingulate	2.8926	0.22453	2.8453	0.22368	-0.0473	-1.64869	0.12369	4.31117	0.02258	0.78711	-0.38	0.265	-13.2453	9.23683	-0.0575	0.10143	3.53556	0.08348	2.9098	0.01524	0.53125	0.006	0.38	0.20914	13.2453	0.83194	0.04505	1.34626
ctx-lh-rostralmiddlefrontal	2.48953	0.13411	2.4644	0.13014	-0.02513	-1.01468	0.05727	2.31215	0.01046	0.42214	-0.171	0.082	-6.90361	3.3105	-0.034	0.0494	1.99437	0.03754	1.51539	0.00685	0.27667	0	0.171	0	6.90361	0.89193	0.02285	1.64115
ctx-lh-superiorfrontal	2.8837	0.15728	2.8631	0.15872	-0.0206	-0.71692	0.04234	1.47337	0.00773	0.269	-0.101	0.068	-3.51499	2.36653	-0.0165	0.038	1.32247	0.02716	0.94513	0.00496	0.17256	0.004	0.101	0.13921	3.51499	0.95696	0.01244	1.9051
ctx-lh-superiorparietal	2.38447	0.15365	2.3486	0.15548	-0.03587	-1.51558	0.03294	1.39189	0.00601	0.25412	-0.093	0.021	-3.92981	0.88737	-0.0345	0.03967	1.67615	0.02807	1.18625	0.00513	0.21658	0.002	0.093	0.08451	3.92981	0.95176	0	5.7476
ctx-lh-superiortemporal	2.79737	0.1691	2.80077	0.15284	0.0034	0.12147	0.06024	2.15221	0.011	0.39294	-0.114	0.161	-4.07278	5.75192	-0.005	0.0454	1.62197	0.03884	1.38772	0.00709	0.25336	0.003	0.161	0.10718	5.75192	0.93218	0.75943	0.119509
ctx-lh-supramarginal	2.57487	0.14607	2.57047	0.1416	-0.0044	-0.17103	0.04142	1.61017	0.00756	0.29398	-0.072	0.103	-2.79864	4.00363	-0.016	0.03333	1.29567	0.02422	0.94141	0.00442	0.17188	0	0.103	0	4.00363	0.95943	0.56521	0.247791
ctx-lh-temporalpole	3.6119	0.32825	3.59723	0.2966	-0.01467	-0.40689	0.17127	4.75154	0.03127	0.86751	-0.321	0.482	-8.90537	13.3719	-0.051	0.13473	3.73785	0.10382	2.88013	0.01895	0.52584	0.004	0.482	0.11096	13.3719	0.85373	0.64255	0.192093
ctx-lh-transversetemporal	2.3379	0.19885	2.33223	0.1846	-0.00567	-0.24268	0.07659	3.27993	0.01398	0.59883	-0.247	0.103	-10.5779	4.41101	-0.0005	0.06053	2.59236	0.04592	1.96642	0.00838	0.35902	0.008	0.247	0.3426	10.5779	0.92245	0.68827	0.162244
ctx-rh-bankssts	2.52943	0.18307	2.5341	0.19092	0.00467	0.18432	0.07654	3.02322	0.01397	0.55196	-0.115	0.226	-4.54228	8.92658	-0.027	0.0578	2.28299	0.04924	1.94505	0.00899	0.35512	0.002	0.226	0.079	8.92658	0.91864	0.74083	0.130284
ctx-rh-caudalanteriorcingulate	2.6069	0.2135	2.58883	0.2137	-0.01807	-0.69544	0.11768	4.52974	0.02148	0.82701	-0.28	0.325	-10.7781	12.5103	-0.03	0.08653	3.33094	0.08024	3.08887	0.01465	0.56395	0.005	0.325	0.19246	12.5103	0.84962	0.40728	0.390109
ctx-rh-caudalmiddlefrontal	2.67	0.14261	2.64603	0.1444	-0.02397	-0.90168	0.04784	1.79972	0.00873	0.32858	-0.159	0.057	-5.9819	2.14445	-0.0185	0.04023	1.51366	0.03476	1.30763	0.00635	0.23874	0	0.159	0	5.9819	0.93275	0.0103	1.98718
ctx-rh-cuneus	1.9217	0.11906	1.90027	0.1085	-0.02143	-1.12159	0.05678	2.97131	0.01037	0.54249	-0.128	0.097	-6.69812	5.07593	-0.022	0.04697	2.45772	0.03765	1.97011	0.00687	0.35969	0.003	0.128	0.15699	6.69812	0.86311	0.04771	1.32136
ctx-rh-entorhinal	3.37683	0.5164	3.3984	0.41928	0.02157	0.63663	0.26396	7.79193	0.04819	1.4226	-0.44	0.712	-12.9885	21.0177	0.01	0.19257	5.68443	0.17831	5.26369	0.03256	0.96101	0.003	0.712	0.08856	21.0177	0.8464	0.65783	0.181887
ctx-rh-frontalpole	2.84873	0.30141	2.83287	0.26695	-0.01587	-0.55853	0.15262	5.37258	0.02787	0.98089	-0.293	0.416	-10.314	14.6438	-0.042	0.11873	4.17957	0.09471	3.33409	0.01729	0.60872	0.015	0.416	0.52802	14.6438	0.85932	0.57346	0.241494
ctx-rh-fusiform	2.5866	0.21426	2.54957	0.17703	-0.03703	-1.44206	0.07629	2.97082	0.01393	0.5424	-0.197	0.116	-7.67109	4.51698	-0.0225	0.06423	2.50122	0.05451	2.12255	0.00995	0.38752	0.002	0.197	0.07787	7.67109	0.9101	0.01263	1.89844
ctx-rh-inferiorparietal	2.56113	0.15179	2.54473	0.13954	-0.0164	-0.6424	0.04266	1.67109	0.00779	0.3051	-0.089	0.07	-3.48619	2.74194	-0.018	0.03687	1.44409	0.02631	1.03061	0.0048	0.18816	0.001	0.089	0.03917	3.48619	0.9524	0.04402	1.35635
ctx-rh-inferiortemporal	2.60207	0.22458	2.6107	0.19591	0.00863	0.33124	0.08912	3.41927	0.01627	0.62427	-0.167	0.24	-6.40734	9.20816	-0.011	0.0691	2.65118	0.0555	2.12926	0.01013	0.38875	0.007	0.24	0.26857	9.20816	0.91263	0.59973	0.222042
ctx-rh-insula	3.0108	0.14873	2.91677	0.16117	-0.09403	-3.17275	0.11377	3.83882	0.02077	0.70087	-0.296	0.076	-9.98723	2.56429	-0.075	0.1189	4.01176	0.08641	2.9156	0.01578	0.53231	0.004	0.296	0.13497	9.98723	0.59168	9e-05	4.02551
ctx-rh-isthmuscingulate	2.6065	0.19873	2.4838	0.23348	-0.1227	-4.82093	0.11758	4.6198	0.02147	0.84346	-0.328	0.173	-12.8873	6.79724	-0.1565	0.1481	5.81891	0.08191	3.2184	0.01496	0.5876	0.016	0.328	0.62865	12.8873	0.71946	0	5.46129
ctx-rh-lateraloccipital	2.2686	0.13149	2.26243	0.10802	-0.00617	-0.2722	0.07422	3.27616	0.01355	0.59814	-0.166	0.22	-7.32724	9.71081	-0.011	0.0549	2.42329	0.0493	2.17602	0.009	0.39728	0	0.22	0	9.71081	0.81432	0.65245	0.185457
ctx-rh-lateralorbitofrontal	2.63007	0.15425	2.56477	0.14649	-0.0653	-2.51404	0.08336	3.20919	0.01522	0.58591	-0.277	0.094	-10.6644	3.61898	-0.073	0.08643	3.32767	0.06026	2.31992	0.011	0.42356	0.01	0.277	0.385	10.6644	0.7677	0.00018	3.74299
ctx-rh-lingual	1.97893	0.1176	1.95507	0.08614	-0.02387	-1.21335	0.07439	3.78166	0.01358	0.69043	-0.168	0.089	-8.54093	4.52466	-0.031	0.0648	3.29436	0.04217	2.14404	0.0077	0.39145	0.002	0.168	0.10168	8.54093	0.724	0.08941	1.04863
ctx-rh-medialorbitofrontal	2.4689	0.15375	2.4554	0.1467	-0.0135	-0.5483	0.07741	3.14415	0.01413	0.57404	-0.164	0.132	-6.66085	5.36118	-0.017	0.06443	2.61695	0.04344	1.76411	0.00793	0.32208	0.003	0.164	0.12185	6.66085	0.86766	0.34739	0.45918
ctx-rh-middletemporal	2.74123	0.17144	2.74673	0.15384	0.0055	0.20044	0.07365	2.68397	0.01345	0.49002	-0.088	0.213	-3.20702	7.76243	-0.017	0.05597	2.03961	0.04706	1.71516	0.00859	0.31314	0.001	0.213	0.03644	7.76243	0.90047	0.68552	0.163981
ctx-rh-paracentral	2.51257	0.19071	2.49927	0.18073	-0.0133	-0.53074	0.06505	2.59576	0.01188	0.47392	-0.124	0.126	-4.94829	5.0281	-0.0015	0.05417	2.16155	0.03713	1.48187	0.00678	0.27055	0.002	0.126	0.07981	5.0281	0.93821	0.27194	0.565521
ctx-rh-parahippocampal	2.56157	0.29951	2.55413	0.28718	-0.00743	-0.29061	0.14862	5.81052	0.02713	1.06085	-0.426	0.25	-16.6546	9.77383	0.0275	0.1193	4.66407	0.08616	3.36835	0.01573	0.61497	0.009	0.426	0.35185	16.6546	0.87542	0.78607	0.104535
ctx-rh-parsopercularis	2.69697	0.17118	2.66003	0.17836	-0.03693	-1.37888	0.06302	2.35287	0.01151	0.42957	-0.143	0.062	-5.3388	2.31473	-0.0395	0.05913	2.2077	0.04202	1.56871	0.00767	0.28641	0.001	0.143	0.03733	5.3388	0.91571	0.00324	2.49004
ctx-rh-parsorbitalis	2.77773	0.18978	2.7641	0.19773	-0.01363	-0.49201	0.07882	2.84464	0.01439	0.51936	-0.255	0.115	-9.20273	4.15025	-0.0015	0.05983	2.15933	0.05198	1.87587	0.00949	0.34249	0.002	0.255	0.07218	9.20273	0.91755	0.35129	0.454337
ctx-rh-parstriangularis	2.59347	0.1578	2.55963	0.14915	-0.03383	-1.31313	0.04671	1.81299	0.00853	0.33101	-0.101	0.079	-3.91997	3.06612	-0.0435	0.04837	1.87719	0.03076	1.19389	0.00562	0.21797	0.005	0.101	0.19405	3.91997	0.93176	0.00044	3.35908
ctx-rh-pericalcarine	1.66923	0.12462	1.64673	0.07835	-0.0225	-1.35707	0.08945	5.39522	0.01633	0.98503	-0.217	0.194	-13.0882	11.701	-0.029	0.0691	4.16771	0.05988	3.61175	0.01093	0.65941	0.001	0.217	0.06031	13.0882	0.62178	0.17884	0.747542
ctx-rh-postcentral	2.2196	0.13691	2.19213	0.11852	-0.02747	-1.24517	0.04826	2.18799	0.00881	0.39947	-0.129	0.089	-5.84804	4.03469	-0.019	0.04193	1.90099	0.03593	1.62875	0.00656	0.29737	0.001	0.129	0.04533	5.84804	0.90926	0.0041	2.38745
ctx-rh-posteriorcingulate	2.67227	0.16596	2.62587	0.16381	-0.0464	-1.75156	0.06625	2.50104	0.0121	0.45663	-0.177	0.084	-6.6816	3.17093	-0.0265	0.0624	2.35555	0.05088	1.92069	0.00929	0.35067	0	0.177	0	6.6816	0.8845	0.00062	3.20515
ctx-rh-precentral	2.6183	0.14237	2.5898	0.15356	-0.0285	-1.09445	0.06714	2.57825	0.01226	0.47072	-0.281	0.061	-10.7909	2.34251	-0.02	0.04937	1.89576	0.05317	2.04173	0.00971	0.37277	0.001	0.281	0.0384	10.7909	0.88299	0.02727	1.56427
ctx-rh-precuneus	2.49087	0.17147	2.471	0.16297	-0.01987	-0.80077	0.03415	1.37656	0.00624	0.25132	-0.092	0.037	-3.70828	1.49138	-0.0135	0.02993	1.20654	0.02545	1.02584	0.00465	0.18729	0	0.092	0	3.70828	0.97289	0.00344	2.46378
ctx-rh-rostralanteriorcingulate	2.90883	0.24331	2.802	0.2258	-0.10683	-3.74143	0.1424	4.98705	0.026	0.91051	-0.384	0.157	-13.4481	5.49832	-0.129	0.14763	5.17029	0.09766	3.42023	0.01783	0.62445	0.025	0.384	0.87552	13.4481	0.73159	0.0003	3.52697
ctx-rh-rostralmiddlefrontal	2.46833	0.11743	2.43213	0.10988	-0.0362	-1.47741	0.04714	1.92407	0.00861	0.35129	-0.119	0.083	-4.85668	3.38743	-0.0355	0.04767	1.94539	0.03504	1.43004	0.0064	0.26109	0.002	0.119	0.08163	4.85668	0.86938	0.00023	3.64163
ctx-rh-superiorfrontal	2.83867	0.1507	2.8183	0.15434	-0.02037	-0.72006	0.04204	1.48624	0.00768	0.27135	-0.09	0.085	-3.18192	3.00515	-0.027	0.03683	1.30223	0.02816	0.99549	0.00514	0.18175	0.001	0.09	0.03535	3.18192	0.95455	0.01279	1.89321
ctx-rh-superiorparietal	2.39597	0.16693	2.36557	0.1608	-0.0304	-1.2769	0.03742	1.5716	0.00683	0.28693	-0.102	0.042	-4.28433	1.76413	-0.0245	0.03727	1.56532	0.03032	1.27354	0.00554	0.23252	0.001	0.102	0.04201	4.28433	0.95795	0.00012	3.93357
ctx-rh-superiortemporal	2.81567	0.18965	2.82423	0.19094	0.00857	0.30379	0.05859	2.07766	0.0107	0.37933	-0.107	0.172	-3.7944	6.0994	0.004	0.0415	1.47166	0.04156	1.47366	0.00759	0.26905	0.003	0.172	0.10639	6.0994	0.95316	0.42973	0.366809
ctx-rh-supramarginal	2.6505	0.16347	2.63027	0.16125	-0.02023	-0.7663	0.03804	1.44072	0.00695	0.26304	-0.101	0.062	-3.8252	2.34815	-0.0215	0.03457	1.30915	0.02519	0.95402	0.0046	0.17418	0.002	0.101	0.07575	3.8252	0.96582	0.00682	2.16624
ctx-rh-temporalpole	3.63813	0.4575	3.69337	0.30431	0.05523	1.50674	0.31869	8.69374	0.05818	1.58725	-0.826	0.804	-22.5329	21.9327	0.02	0.2239	6.10789	0.22991	6.27191	0.04198	1.14509	0.015	0.826	0.4092	22.5329	0.66451	0.35032	0.455527
ctx-rh-transversetemporal	2.34583	0.23103	2.37517	0.25508	0.02933	1.24267	0.09636	4.08198	0.01759	0.74526	-0.121	0.266	-5.12603	11.2688	0.0165	0.08073	3.42018	0.05858	2.48174	0.0107	0.4531	0.006	0.266	0.25419	11.2688	0.91715	0.10619	0.973897

## Sheet: OSX10.6 vs. OSX10.5
v4.3.1
Struct	Mean1	sd1	Mean2	sd2	Mean diff	Mean diff %	sd Diff	sd Diff %	se Diff	se Diff %	min Diff	max Diff	min Diff %	max Diff %	median	Mean AbsDiff	Mean AbsDiff %	sd AbsDiff	sd AbsDiff %	se AbsDiff	se AbsDiff %	min AbsDiff	max AbsDiff	min AbsDiff %	max AbsDiff %	ICC	p	-log10(p)
ctx-lh-bankssts	2.40103	0.14459	2.39793	0.12824	-0.0031	-0.12919	0.05687	2.37028	0.01038	0.43275	-0.132	0.152	-5.50118	6.3347	-0.0055	0.0399	1.66286	0.03997	1.66585	0.0073	0.30414	0	0.152	0	6.3347	0.91592	0.76742	0.114966
ctx-lh-caudalanteriorcingulate	2.71663	0.21032	2.73047	0.21417	0.01383	0.50792	0.0748	2.74645	0.01366	0.50143	-0.193	0.146	-7.08633	5.36066	0.0275	0.05737	2.10632	0.04887	1.79452	0.00892	0.32763	0.001	0.193	0.03672	7.08633	0.93785	0.31947	0.495569
ctx-lh-caudalmiddlefrontal	2.6779	0.14081	2.68317	0.14208	0.00527	0.19648	0.01926	0.71839	0.00352	0.13116	-0.028	0.065	-1.04457	2.42489	0.004	0.01467	0.54716	0.0133	0.49631	0.00243	0.09061	0.001	0.065	0.0373	2.42489	0.99035	0.14494	0.838809
ctx-lh-cuneus	1.91177	0.11861	1.923	0.11583	0.01123	0.58587	0.0407	2.12293	0.00743	0.38759	-0.063	0.137	-3.28573	7.14515	0.0065	0.02997	1.56289	0.0293	1.52809	0.00535	0.27899	0	0.137	0	7.14515	0.93722	0.14147	0.849341
ctx-lh-entorhinal	3.214	0.42844	3.22487	0.39566	0.01087	0.33753	0.14722	4.57276	0.02688	0.83487	-0.205	0.579	-6.36758	17.9845	-0.0365	0.10307	3.20139	0.10395	3.22889	0.01898	0.58951	0.007	0.579	0.21743	17.9845	0.938	0.68896	0.161805
ctx-lh-frontalpole	2.90007	0.29689	2.88957	0.26723	-0.0105	-0.36272	0.126	4.35277	0.02301	0.7947	-0.262	0.32	-9.05066	11.0542	-0.028	0.09377	3.23912	0.08304	2.86863	0.01516	0.52374	0.014	0.32	0.48362	11.0542	0.90299	0.65149	0.186091
ctx-lh-fusiform	2.50717	0.20648	2.5186	0.2002	0.01143	0.45499	0.04387	1.74581	0.00801	0.31874	-0.054	0.154	-2.14892	6.12842	0.0025	0.03237	1.28803	0.03124	1.2433	0.0057	0.22699	0	0.154	0	6.12842	0.97594	0.16413	0.784818
ctx-lh-inferiorparietal	2.52267	0.13666	2.52543	0.13714	0.00277	0.10961	0.02151	0.85213	0.00393	0.15558	-0.045	0.056	-1.78285	2.21866	0.0025	0.01577	0.62466	0.01461	0.5787	0.00267	0.10566	0	0.056	0	2.21866	0.98786	0.4867	0.312735
ctx-lh-inferiortemporal	2.53767	0.20263	2.53933	0.19628	0.00167	0.06565	0.05855	2.30643	0.01069	0.42109	-0.142	0.126	-5.59386	4.96356	0.0045	0.04247	1.6729	0.03956	1.55852	0.00722	0.28454	0.001	0.142	0.03939	5.59386	0.9583	0.87718	0.0569099
ctx-lh-insula	3.03577	0.18262	3.0332	0.15692	-0.00257	-0.08458	0.04774	1.57322	0.00872	0.28723	-0.118	0.067	-3.88864	2.20795	0.001	0.03717	1.22481	0.02927	0.96464	0.00534	0.17612	0.002	0.118	0.06591	3.88864	0.96186	0.77049	0.113234
ctx-lh-isthmuscingulate	2.64653	0.23256	2.71	0.20307	0.06347	2.36969	0.12806	4.78156	0.02338	0.87299	-0.064	0.65	-2.3896	24.2694	0.0425	0.08027	2.99696	0.11791	4.40237	0.02153	0.80376	0.001	0.65	0.03734	24.2694	0.79517	0.01106	1.95622
ctx-lh-lateraloccipital	2.1971	0.1057	2.20197	0.10003	0.00487	0.22126	0.02616	1.18957	0.00478	0.21718	-0.05	0.065	-2.27321	2.95517	0.0065	0.0204	0.92747	0.01669	0.75885	0.00305	0.13855	0.002	0.065	0.09093	2.95517	0.96763	0.31674	0.4993
ctx-lh-lateralorbitofrontal	2.6813	0.16703	2.6841	0.16189	0.0028	0.10437	0.039	1.45359	0.00712	0.26539	-0.072	0.093	-2.68386	3.46666	0.0065	0.02967	1.10585	0.02487	0.92689	0.00454	0.16923	0.004	0.093	0.1491	3.46666	0.97268	0.69699	0.156776
ctx-lh-lingual	1.96207	0.1124	1.96853	0.10281	0.00647	0.32904	0.03055	1.5544	0.00558	0.28379	-0.067	0.077	-3.40915	3.91798	0.004	0.023	1.1703	0.02072	1.0542	0.00378	0.19247	0.001	0.077	0.05088	3.91798	0.95933	0.25574	0.592208
ctx-lh-medialorbitofrontal	2.53683	0.16632	2.54003	0.16721	0.0032	0.12606	0.0462	1.81993	0.00843	0.33227	-0.064	0.118	-2.52124	4.64854	-0.0055	0.03747	1.47598	0.02632	1.03681	0.00481	0.18929	0.002	0.118	0.07879	4.64854	0.9627	0.70716	0.150483
ctx-lh-middletemporal	2.7214	0.16824	2.71963	0.1524	-0.00177	-0.06494	0.05488	2.01713	0.01002	0.36828	-0.139	0.124	-5.10932	4.55796	0.001	0.0385	1.41517	0.03849	1.41472	0.00703	0.25829	0.001	0.139	0.03676	5.10932	0.94339	0.86126	0.0648662
ctx-lh-paracentral	2.46133	0.12579	2.4721	0.1306	0.01077	0.43648	0.03166	1.2836	0.00578	0.23435	-0.056	0.093	-2.27022	3.7702	0.006	0.02283	0.92566	0.02415	0.97894	0.00441	0.17873	0	0.093	0	3.7702	0.96704	0.07269	1.1385
ctx-lh-parahippocampal	2.64683	0.32782	2.60533	0.30526	-0.0415	-1.5803	0.15453	5.88445	0.02821	1.07435	-0.629	0.231	-23.952	8.79637	-0.0155	0.09923	3.77876	0.1244	4.73697	0.02271	0.86485	0.002	0.629	0.07616	23.952	0.87666	0.15208	0.817937
ctx-lh-parsopercularis	2.6431	0.14801	2.64603	0.14508	0.00293	0.11092	0.03297	1.24687	0.00602	0.22765	-0.094	0.063	-3.55445	2.38224	0.002	0.02327	0.87979	0.02316	0.87561	0.00423	0.15986	0	0.094	0	3.55445	0.97532	0.62975	0.200835
ctx-lh-parsorbitalis	2.75533	0.2458	2.7631	0.25609	0.00777	0.28148	0.06221	2.25458	0.01136	0.41163	-0.141	0.156	-5.11015	5.65378	0.002	0.0433	1.56929	0.04464	1.61787	0.00815	0.29538	0.001	0.156	0.03624	5.65378	0.96982	0.49951	0.301452
ctx-lh-parstriangularis	2.57583	0.19617	2.56437	0.19189	-0.01147	-0.44616	0.04874	1.89628	0.0089	0.34621	-0.091	0.132	-3.54071	5.13599	-0.015	0.03993	1.55377	0.02935	1.14208	0.00536	0.20852	0.001	0.132	0.03891	5.13599	0.96777	0.20769	0.682572
ctx-lh-pericalcarine	1.69387	0.15563	1.69817	0.13036	0.0043	0.25353	0.0594	3.50212	0.01084	0.6394	-0.252	0.092	-14.8583	5.42447	0.0045	0.03437	2.02632	0.04822	2.8432	0.0088	0.51909	0	0.252	0	14.8583	0.91671	0.69462	0.158253
ctx-lh-postcentral	2.2332	0.13624	2.23627	0.13174	0.00307	0.13723	0.01351	0.6047	0.00247	0.1104	-0.021	0.03	-0.93972	1.34244	0.0035	0.01167	0.52206	0.00718	0.32125	0.00131	0.05865	0	0.03	0	1.34244	0.99482	0.22384	0.650065
ctx-lh-posteriorcingulate	2.6921	0.15268	2.72483	0.14321	0.03273	1.20856	0.03644	1.34523	0.00665	0.2456	-0.038	0.091	-1.403	3.35984	0.031	0.04167	1.53838	0.0253	0.93401	0.00462	0.17053	0	0.091	0	3.35984	0.94689	3e-05	4.50045
ctx-lh-precentral	2.62493	0.13186	2.62877	0.12451	0.00383	0.14593	0.01897	0.72223	0.00346	0.13186	-0.043	0.04	-1.63694	1.52273	0.0045	0.01583	0.60275	0.01076	0.40965	0.00196	0.07479	0.003	0.043	0.11421	1.63694	0.98897	0.27753	0.556696
ctx-lh-precuneus	2.46293	0.17565	2.46613	0.17017	0.0032	0.12984	0.03155	1.28003	0.00576	0.2337	-0.071	0.067	-2.88087	2.71856	-0.002	0.02327	0.94406	0.02111	0.8567	0.00385	0.15641	0.001	0.071	0.04058	2.88087	0.98374	0.58275	0.234515
ctx-lh-rostralanteriorcingulate	2.87943	0.22478	2.90243	0.21554	0.023	0.79559	0.05646	1.953	0.01031	0.35657	-0.097	0.169	-3.35532	5.84587	0.0145	0.043	1.48741	0.04269	1.47659	0.00779	0.26959	0.001	0.169	0.03459	5.84587	0.96285	0.03356	1.47419
ctx-lh-rostralmiddlefrontal	2.48907	0.13396	2.49107	0.1264	0.002	0.08032	0.02961	1.18899	0.00541	0.21708	-0.073	0.055	-2.93165	2.20878	0.003	0.02193	0.88083	0.01957	0.78597	0.00357	0.1435	0	0.073	0	2.93165	0.97489	0.71407	0.146262
ctx-lh-superiorfrontal	2.88333	0.15543	2.88453	0.15054	0.0012	0.04161	0.02685	0.93102	0.0049	0.16998	-0.042	0.074	-1.45635	2.56594	0.002	0.0212	0.73511	0.01605	0.5564	0.00293	0.10158	0	0.074	0	2.56594	0.98508	0.80834	0.0924048
ctx-lh-superiorparietal	2.38383	0.15096	2.384	0.14873	0.00017	0.00699	0.01635	0.68566	0.00298	0.12518	-0.047	0.037	-1.97154	1.55207	0.001	0.0113	0.47401	0.01162	0.48759	0.00212	0.08902	0	0.047	0	1.97154	0.99425	0.95585	0.0196127
ctx-lh-superiortemporal	2.79983	0.17225	2.793	0.16971	-0.00683	-0.24436	0.03068	1.09711	0.0056	0.2003	-0.069	0.064	-2.46744	2.28865	-0.006	0.02303	0.82367	0.02099	0.75073	0.00383	0.13706	0.001	0.069	0.03576	2.46744	0.98364	0.23231	0.633927
ctx-lh-supramarginal	2.5817	0.14672	2.5849	0.14599	0.0032	0.12387	0.02641	1.02238	0.00482	0.18666	-0.051	0.073	-1.97422	2.82584	0.0065	0.0202	0.78195	0.01691	0.65468	0.00309	0.11953	0	0.073	0	2.82584	0.98402	0.51217	0.290582
ctx-lh-temporalpole	3.58633	0.34	3.592	0.33469	0.00567	0.15788	0.12214	3.4031	0.0223	0.62132	-0.235	0.308	-6.54748	8.58137	0.0145	0.09113	2.53912	0.07975	2.22202	0.01456	0.40568	0.002	0.308	0.05572	8.58137	0.93644	0.8012	0.096257
ctx-lh-transversetemporal	2.3255	0.19035	2.32333	0.18867	-0.00217	-0.09321	0.07176	3.0874	0.0131	0.56368	-0.134	0.247	-5.76488	10.6263	0.0055	0.04803	2.06647	0.05261	2.26351	0.00961	0.41326	0.001	0.247	0.04302	10.6263	0.93055	0.8698	0.0605797
ctx-rh-bankssts	2.51773	0.19325	2.5256	0.18212	0.00787	0.31196	0.08198	3.25095	0.01497	0.59354	-0.073	0.393	-2.89491	15.5849	-0.0095	0.04313	1.71051	0.06971	2.76452	0.01273	0.50473	0.001	0.393	0.03965	15.5849	0.90688	0.60316	0.219566
ctx-rh-caudalanteriorcingulate	2.61363	0.21087	2.64137	0.22379	0.02773	1.0555	0.05994	2.28142	0.01094	0.41653	-0.116	0.143	-4.41484	5.44243	0.0315	0.05207	1.98161	0.03981	1.51499	0.00727	0.2766	0	0.143	0	5.44243	0.95528	0.01693	1.77122
ctx-rh-caudalmiddlefrontal	2.6773	0.15427	2.6802	0.14837	0.0029	0.10826	0.03172	1.18418	0.00579	0.2162	-0.049	0.068	-1.82921	2.5385	0.0015	0.02557	0.95443	0.0184	0.68707	0.00336	0.12544	0	0.068	0	2.5385	0.97858	0.62034	0.207376
ctx-rh-cuneus	1.92367	0.12197	1.92373	0.12186	7e-05	0.00347	0.03273	1.70162	0.00598	0.31067	-0.064	0.08	-3.32693	4.15865	-0.0045	0.0244	1.26839	0.02135	1.1096	0.0039	0.20258	0	0.08	0	4.15865	0.96513	0.99118	0.00384785
ctx-rh-entorhinal	3.39793	0.47154	3.40353	0.46348	0.0056	0.16467	0.23814	7.00249	0.04348	1.27847	-0.354	0.956	-10.4095	28.1116	-0.03	0.15267	4.48923	0.18064	5.31176	0.03298	0.96979	0.003	0.956	0.08822	28.1116	0.87426	0.8984	0.0465303
ctx-rh-frontalpole	2.85143	0.28651	2.85553	0.28946	0.0041	0.14368	0.10422	3.65244	0.01903	0.66684	-0.29	0.181	-10.163	6.34312	-0.001	0.07743	2.71364	0.06839	2.39664	0.01249	0.43756	0.006	0.29	0.21027	10.163	0.93653	0.83091	0.0804444
ctx-rh-fusiform	2.5746	0.21366	2.5799	0.21743	0.0053	0.20565	0.05559	2.15682	0.01015	0.39378	-0.085	0.147	-3.29809	5.70375	-0.006	0.04297	1.66715	0.03477	1.34921	0.00635	0.24633	0	0.147	0	5.70375	0.96754	0.60547	0.217903
ctx-rh-inferiorparietal	2.5661	0.15481	2.5673	0.15291	0.0012	0.04675	0.0285	1.11055	0.0052	0.20276	-0.04	0.062	-1.55842	2.41555	-0.001	0.02207	0.85973	0.01761	0.68627	0.00322	0.1253	0.001	0.062	0.03896	2.41555	0.98338	0.81926	0.0865809
ctx-rh-inferiortemporal	2.60253	0.22727	2.60563	0.22822	0.0031	0.11904	0.0585	2.2464	0.01068	0.41013	-0.089	0.143	-3.41771	5.49137	0.0065	0.04483	1.72165	0.03678	1.41232	0.00671	0.25785	0.002	0.143	0.07681	5.49137	0.968	0.77369	0.111436
ctx-rh-insula	3.0231	0.1707	3.02187	0.16186	-0.00123	-0.04081	0.05818	1.92492	0.01062	0.35144	-0.098	0.203	-3.24237	6.71633	-0.0035	0.0409	1.35319	0.04069	1.34639	0.00743	0.24582	0.002	0.203	0.06617	6.71633	0.94078	0.90837	0.04174
ctx-rh-isthmuscingulate	2.55143	0.29034	2.6382	0.22088	0.08677	3.34385	0.1921	7.40314	0.03507	1.35162	-0.058	1.054	-2.23522	40.6194	0.051	0.09523	3.67014	0.1879	7.24147	0.03431	1.32211	0.002	1.054	0.07708	40.6194	0.6829	0.01946	1.71087
ctx-rh-lateraloccipital	2.2615	0.13193	2.26463	0.12091	0.00313	0.13846	0.02923	1.29182	0.00534	0.23585	-0.059	0.055	-2.60707	2.43033	0	0.02273	1.00454	0.01817	0.80296	0.00332	0.1466	0	0.059	0	2.60707	0.97389	0.56172	0.250484
ctx-rh-lateralorbitofrontal	2.63403	0.16727	2.64047	0.16422	0.00643	0.24394	0.05724	2.17055	0.01045	0.39629	-0.103	0.198	-3.90558	7.50782	0.0045	0.04057	1.53822	0.04021	1.52484	0.00734	0.2784	0.002	0.198	0.07584	7.50782	0.94156	0.54298	0.265215
ctx-rh-lingual	1.96553	0.10214	1.9641	0.10408	-0.00143	-0.07295	0.04417	2.24826	0.00807	0.41047	-0.068	0.138	-3.46089	7.02356	-0.0105	0.03343	1.7016	0.02823	1.43697	0.00515	0.26235	0.003	0.138	0.15269	7.02356	0.91107	0.86018	0.0654134
ctx-rh-medialorbitofrontal	2.47257	0.15368	2.48083	0.15602	0.00827	0.33378	0.0501	2.02296	0.00915	0.36934	-0.093	0.124	-3.755	5.00667	0.0075	0.0386	1.55853	0.03224	1.30187	0.00589	0.23769	0.001	0.124	0.04037	5.00667	0.94797	0.3736	0.427598
ctx-rh-middletemporal	2.75037	0.17561	2.74257	0.17064	-0.0078	-0.284	0.05757	2.09606	0.01051	0.38269	-0.131	0.157	-4.76977	5.71644	-0.0075	0.04	1.45642	0.04149	1.51083	0.00758	0.27584	0.001	0.157	0.03641	5.71644	0.94553	0.46398	0.333499
ctx-rh-paracentral	2.51797	0.19462	2.5127	0.18991	-0.00527	-0.20938	0.02905	1.15474	0.0053	0.21083	-0.056	0.085	-2.22634	3.37928	-0.0085	0.02087	0.82958	0.02054	0.81661	0.00375	0.14909	0.001	0.085	0.03975	3.37928	0.9886	0.32885	0.482996
ctx-rh-parahippocampal	2.5299	0.36433	2.58243	0.31725	0.05253	2.05516	0.27737	10.8511	0.05064	1.98113	-0.182	1.132	-7.12003	44.2851	-0.0025	0.10913	4.26941	0.25975	10.1617	0.04742	1.85526	0.003	1.132	0.11735	44.2851	0.66964	0.30814	0.511256
ctx-rh-parsopercularis	2.69773	0.16571	2.69387	0.16982	-0.00387	-0.14343	0.02731	1.01292	0.00499	0.18493	-0.045	0.06	-1.66927	2.22568	-0.008	0.0232	0.8606	0.01429	0.53021	0.00261	0.0968	0	0.06	0	2.22568	0.98693	0.44427	0.352356
ctx-rh-parsorbitalis	2.78907	0.2088	2.78883	0.19876	-0.00023	-0.00837	0.05821	2.08701	0.01063	0.38103	-0.135	0.12	-4.84053	4.30269	0.0105	0.04603	1.65056	0.03458	1.23992	0.00631	0.22638	0.003	0.135	0.10757	4.84053	0.96056	0.98263	0.00760884
ctx-rh-parstriangularis	2.60777	0.16878	2.60363	0.16825	-0.00413	-0.15863	0.03283	1.25983	0.00599	0.23001	-0.054	0.076	-2.07239	2.91668	-0.0095	0.0258	0.99014	0.02017	0.77397	0.00368	0.14131	0.001	0.076	0.03837	2.91668	0.98135	0.4959	0.304601
ctx-rh-pericalcarine	1.6598	0.12601	1.6773	0.11921	0.0175	1.04881	0.04219	2.52863	0.0077	0.46166	-0.041	0.119	-2.45722	7.13194	0.014	0.03397	2.0357	0.03006	1.80137	0.00549	0.32888	0	0.119	0	7.13194	0.93291	0.03069	1.51293
ctx-rh-postcentral	2.2202	0.12808	2.22073	0.12986	0.00053	0.02402	0.02246	1.0113	0.0041	0.18464	-0.037	0.072	-1.66631	3.24256	-0.0025	0.01607	0.72357	0.01541	0.69406	0.00281	0.12672	0	0.072	0	3.24256	0.98534	0.8974	0.0470124
ctx-rh-posteriorcingulate	2.6819	0.17298	2.72237	0.15994	0.04047	1.49758	0.03621	1.34015	0.00661	0.24468	-0.048	0.13	-1.77638	4.81102	0.037	0.04527	1.67522	0.02976	1.10135	0.00543	0.20108	0.005	0.13	0.18504	4.81102	0.9484	0	5.94596
ctx-rh-precentral	2.6131	0.14408	2.62107	0.13749	0.00797	0.30441	0.02549	0.97405	0.00465	0.17784	-0.035	0.112	-1.33736	4.27957	0.005	0.01703	0.65085	0.02038	0.77873	0.00372	0.14218	0	0.112	0	4.27957	0.98257	0.09762	1.01046
ctx-rh-precuneus	2.49647	0.16669	2.4928	0.17121	-0.00367	-0.14698	0.0239	0.95804	0.00436	0.17491	-0.073	0.051	-2.92628	2.04439	-0.0035	0.01827	0.73224	0.01549	0.62092	0.00283	0.11336	0.001	0.073	0.04008	2.92628	0.99009	0.40761	0.389758
ctx-rh-rostralanteriorcingulate	2.88903	0.24291	2.9221	0.25164	0.03307	1.13805	0.07868	2.70777	0.01436	0.49437	-0.143	0.255	-4.92158	8.77625	0.021	0.05813	2.00076	0.06185	2.12856	0.01129	0.38862	0.001	0.255	0.03442	8.77625	0.94236	0.02871	1.54199
ctx-rh-rostralmiddlefrontal	2.47097	0.12207	2.47173	0.11858	0.00077	0.03102	0.03446	1.39418	0.00629	0.25454	-0.062	0.1	-2.50875	4.04637	0.0045	0.02517	1.01834	0.02308	0.93379	0.00421	0.17049	0.001	0.1	0.04046	4.04637	0.96033	0.90384	0.0439072
ctx-rh-superiorfrontal	2.83897	0.15331	2.84037	0.15358	0.0014	0.0493	0.02743	0.96608	0.00501	0.17638	-0.042	0.076	-1.47905	2.67637	-0.0025	0.01987	0.69961	0.01861	0.65535	0.0034	0.11965	0.001	0.076	0.03521	2.67637	0.98451	0.78184	0.106884
ctx-rh-superiorparietal	2.39217	0.16543	2.39553	0.16873	0.00337	0.14064	0.0189	0.78967	0.00345	0.14417	-0.03	0.049	-1.25321	2.0469	0.002	0.01517	0.63357	0.01145	0.47832	0.00209	0.08733	0	0.049	0	2.0469	0.99361	0.33739	0.471865
ctx-rh-superiortemporal	2.82447	0.19298	2.82023	0.1909	-0.00423	-0.14999	0.03694	1.30889	0.00674	0.23897	-0.105	0.049	-3.7203	1.73613	0.001	0.02837	1.00507	0.02347	0.83154	0.00428	0.15182	0	0.105	0	3.7203	0.98185	0.53513	0.271538
ctx-rh-supramarginal	2.6494	0.16537	2.64917	0.16156	-0.00023	-0.00881	0.03955	1.49298	0.00722	0.27258	-0.061	0.161	-2.3025	6.07712	-0.0095	0.02517	0.94994	0.03015	1.13823	0.00551	0.20781	0.001	0.161	0.03774	6.07712	0.97169	0.97445	0.0112439
ctx-rh-temporalpole	3.57947	0.50137	3.6282	0.47642	0.04873	1.35226	0.15208	4.22004	0.02777	0.77047	-0.254	0.49	-7.04806	13.5966	0.0355	0.10313	2.86177	0.12076	3.35086	0.02205	0.61178	0.009	0.49	0.24974	13.5966	0.94838	0.0898	1.04672
ctx-rh-transversetemporal	2.33023	0.23368	2.33107	0.23325	0.00083	0.03575	0.08768	3.76218	0.01601	0.68688	-0.178	0.233	-7.63735	9.9972	-0.009	0.0625	2.68165	0.0604	2.59154	0.01103	0.47315	0.001	0.233	0.04291	9.9972	0.93174	0.95884	0.0182534
v4.5.0
Struct	Mean1	sd1	Mean2	sd2	Mean diff	Mean diff %	sd Diff	sd Diff %	se Diff	se Diff %	min Diff	max Diff	min Diff %	max Diff %	median	Mean AbsDiff	Mean AbsDiff %	sd AbsDiff	sd AbsDiff %	se AbsDiff	se AbsDiff %	min AbsDiff	max AbsDiff	min AbsDiff %	max AbsDiff %	ICC(1,1)	p	-log10(p)
ctx-lh-bankssts	2.394	0.13954	2.39533	0.14534	0.00133	0.05568	0.04611	1.92573	0.00842	0.35159	-0.079	0.124	-3.299	5.17818	-0.0085	0.03607	1.50612	0.02798	1.16834	0.00511	0.21331	0.003	0.124	0.12528	5.17818	0.94927	0.87527	0.0578611
ctx-lh-caudalanteriorcingulate	2.71237	0.21658	2.72293	0.21883	0.01057	0.38882	0.07324	2.69481	0.01337	0.492	-0.135	0.146	-4.96753	5.37229	0.01	0.05763	2.12071	0.0452	1.6631	0.00825	0.30364	0.003	0.146	0.11039	5.37229	0.94411	0.43578	0.360729
ctx-lh-caudalmiddlefrontal	2.67933	0.14074	2.68383	0.14526	0.0045	0.16781	0.02691	1.0034	0.00491	0.18319	-0.039	0.094	-1.45437	3.5054	0.0015	0.0203	0.75702	0.01785	0.66566	0.00326	0.12153	0	0.094	0	3.5054	0.9824	0.36721	0.435089
ctx-lh-cuneus	1.9167	0.11649	1.92567	0.12096	0.00897	0.46673	0.03579	1.86312	0.00654	0.34016	-0.082	0.12	-4.2682	6.24614	0.004	0.0243	1.26485	0.02745	1.42883	0.00501	0.26087	0	0.12	0	6.24614	0.95327	0.18056	0.743386
ctx-lh-entorhinal	3.22093	0.41653	3.23827	0.40368	0.01733	0.5367	0.11444	3.54333	0.02089	0.64692	-0.272	0.225	-8.42209	6.96681	0.027	0.09047	2.80117	0.07028	2.17625	0.01283	0.39733	0.002	0.272	0.06192	8.42209	0.96148	0.41353	0.383495
ctx-lh-frontalpole	2.8898	0.27952	2.905	0.30094	0.0152	0.52461	0.09253	3.19363	0.01689	0.58308	-0.184	0.247	-6.35052	8.52488	0.0275	0.06733	2.32392	0.06412	2.21295	0.01171	0.40403	0.001	0.247	0.03451	8.52488	0.94956	0.37568	0.425187
ctx-lh-fusiform	2.516	0.19214	2.5114	0.19561	-0.0046	-0.183	0.03964	1.57683	0.00724	0.28789	-0.101	0.118	-4.01798	4.69427	-0.008	0.02647	1.0529	0.02947	1.17227	0.00538	0.21403	0	0.118	0	4.69427	0.97951	0.52999	0.275734
ctx-lh-inferiorparietal	2.52283	0.13902	2.52147	0.13781	-0.00137	-0.05419	0.02563	1.01617	0.00468	0.18553	-0.042	0.088	-1.66525	3.48909	-0.003	0.01777	0.70443	0.01823	0.72271	0.00333	0.13195	0	0.088	0	3.48909	0.98338	0.77231	0.112209
ctx-lh-inferiortemporal	2.53813	0.19274	2.53387	0.1857	-0.00427	-0.16824	0.06452	2.5442	0.01178	0.46451	-0.094	0.241	-3.70663	9.50315	0.005	0.044	1.73501	0.04668	1.8407	0.00852	0.33606	0.002	0.241	0.07886	9.50315	0.94352	0.71983	0.14277
ctx-lh-insula	3.031	0.15838	3.03813	0.17636	0.00713	0.23507	0.07971	2.62681	0.01455	0.47959	-0.118	0.375	-3.88853	12.3576	0.0035	0.04213	1.38845	0.0676	2.22779	0.01234	0.40674	0.003	0.375	0.09886	12.3576	0.88961	0.62772	0.202238
ctx-lh-isthmuscingulate	2.6678	0.20977	2.70057	0.20554	0.03277	1.22073	0.08744	3.25763	0.01596	0.59476	-0.064	0.376	-2.38433	14.008	0.013	0.0573	2.13473	0.07321	2.72755	0.01337	0.49798	0.001	0.376	0.03725	14.008	0.90232	0.04925	1.30763
ctx-lh-lateraloccipital	2.2008	0.09884	2.195	0.09766	-0.0058	-0.26389	0.03876	1.7636	0.00708	0.32199	-0.1	0.09	-4.5498	4.09481	-0.0055	0.0264	1.20115	0.02857	1.29993	0.00522	0.23733	0.001	0.1	0.04549	4.5498	0.923	0.41915	0.377628
ctx-lh-lateralorbitofrontal	2.67127	0.16242	2.67957	0.16294	0.0083	0.31023	0.08029	3.00119	0.01466	0.54794	-0.072	0.394	-2.69117	14.7267	-0.0025	0.04083	1.52624	0.06924	2.58785	0.01264	0.47247	0	0.394	0	14.7267	0.88079	0.57563	0.239856
ctx-lh-lingual	1.96627	0.10596	1.96713	0.10232	0.00087	0.04407	0.03239	1.64695	0.00591	0.30069	-0.066	0.072	-3.35587	3.66096	0.002	0.0238	1.21015	0.02154	1.09522	0.00393	0.19996	0.001	0.072	0.05084	3.66096	0.95319	0.8845	0.053301
ctx-lh-medialorbitofrontal	2.5359	0.16504	2.53433	0.17117	-0.00157	-0.0618	0.05829	2.2992	0.01064	0.41977	-0.124	0.129	-4.89129	5.08852	-0.012	0.0467	1.84212	0.03382	1.33411	0.00617	0.24357	0.001	0.129	0.03944	5.08852	0.94181	0.88398	0.0535572
ctx-lh-middletemporal	2.73347	0.16917	2.7209	0.16426	-0.01257	-0.46079	0.05387	1.9753	0.00984	0.36064	-0.142	0.064	-5.20684	2.34674	-0.005	0.04117	1.50949	0.03622	1.32827	0.00661	0.24251	0.002	0.142	0.07333	5.20684	0.94673	0.21148	0.674724
ctx-lh-paracentral	2.46383	0.12959	2.4689	0.13154	0.00507	0.20543	0.04229	1.71475	0.00772	0.31307	-0.089	0.108	-3.60855	4.37891	-0.0015	0.03133	1.27043	0.02828	1.14647	0.00516	0.20932	0.001	0.108	0.04054	4.37891	0.94851	0.51688	0.286613
ctx-lh-parahippocampal	2.5984	0.3873	2.61093	0.31388	0.01253	0.48119	0.24955	9.58103	0.04556	1.74925	-0.472	1.114	-18.1213	42.7694	-0.014	0.12507	4.80164	0.21508	8.25742	0.03927	1.50759	0	1.114	0	42.7694	0.75619	0.7852	0.105017
ctx-lh-parsopercularis	2.64323	0.14414	2.64953	0.15376	0.0063	0.23806	0.04439	1.67733	0.0081	0.30624	-0.135	0.135	-5.1013	5.1013	0.0065	0.02783	1.05175	0.03479	1.31444	0.00635	0.23998	0.001	0.135	0.03778	5.1013	0.95622	0.44324	0.353364
ctx-lh-parsorbitalis	2.76893	0.24382	2.77017	0.25714	0.00123	0.04453	0.06222	2.24662	0.01136	0.41018	-0.171	0.156	-6.17429	5.63269	0.002	0.0433	1.56343	0.04397	1.58769	0.00803	0.28987	0.001	0.171	0.0361	6.17429	0.97017	0.91429	0.0389128
ctx-lh-parstriangularis	2.57657	0.18636	2.57783	0.19613	0.00127	0.04915	0.04251	1.64956	0.00776	0.30117	-0.094	0.08	-3.64736	3.10414	0.003	0.0318	1.2339	0.02762	1.0717	0.00504	0.19566	0.001	0.094	0.0388	3.64736	0.9761	0.87149	0.0597372
ctx-lh-pericalcarine	1.69983	0.15387	1.69473	0.13356	-0.0051	-0.30048	0.06378	3.75751	0.01164	0.68603	-0.252	0.097	-14.8473	5.71502	-0.0035	0.0413	2.4333	0.04827	2.8438	0.00881	0.5192	0.002	0.252	0.11784	14.8473	0.90454	0.66463	0.177422
ctx-lh-postcentral	2.2392	0.13446	2.2375	0.13542	-0.0017	-0.07595	0.0161	0.71934	0.00294	0.13133	-0.047	0.033	-2.09976	1.4743	-0.001	0.01243	0.55547	0.01012	0.45192	0.00185	0.08251	0	0.047	0	2.09976	0.99304	0.56753	0.24601
ctx-lh-posteriorcingulate	2.69257	0.15715	2.72023	0.15645	0.02767	1.02227	0.05342	1.97395	0.00975	0.36039	-0.109	0.134	-4.0275	4.95122	0.0315	0.04853	1.79328	0.03477	1.28484	0.00635	0.23458	0	0.134	0	4.95122	0.92881	0.00823	2.08446
ctx-lh-precentral	2.62403	0.12984	2.62587	0.12921	0.00183	0.06984	0.01974	0.75214	0.0036	0.13732	-0.032	0.037	-1.21907	1.40955	0.0025	0.0171	0.65144	0.00953	0.36298	0.00174	0.06627	0.001	0.037	0.0381	1.40955	0.98867	0.61488	0.211215
ctx-lh-precuneus	2.45987	0.17295	2.46313	0.17016	0.00327	0.13271	0.03126	1.26977	0.00571	0.23183	-0.071	0.066	-2.88442	2.68129	-0.0005	0.0238	0.96689	0.02005	0.8145	0.00366	0.14871	0.002	0.071	0.08126	2.88442	0.98377	0.57142	0.243044
ctx-lh-rostralanteriorcingulate	2.87897	0.21731	2.89307	0.21936	0.0141	0.48856	0.10135	3.51159	0.0185	0.64113	-0.19	0.322	-6.58347	11.1572	0.001	0.07237	2.50749	0.07113	2.46453	0.01299	0.44996	0.001	0.322	0.03465	11.1572	0.8937	0.45219	0.344678
ctx-lh-rostralmiddlefrontal	2.4904	0.13133	2.48913	0.13354	-0.00127	-0.05087	0.02874	1.15448	0.00525	0.21078	-0.058	0.075	-2.32954	3.01233	-0.0015	0.022	0.88362	0.01809	0.72649	0.0033	0.13264	0.001	0.075	0.04017	3.01233	0.97718	0.81097	0.0909934
ctx-lh-superiorfrontal	2.88447	0.15373	2.88143	0.16305	-0.00303	-0.10522	0.02352	0.81584	0.00429	0.14895	-0.052	0.068	-1.80371	2.3587	-0.0015	0.0171	0.59314	0.01613	0.55955	0.00295	0.10216	0	0.068	0	2.3587	0.98917	0.48559	0.31373
ctx-lh-superiorparietal	2.38417	0.1521	2.38533	0.15325	0.00117	0.04892	0.02484	1.04175	0.00454	0.1902	-0.035	0.081	-1.46765	3.39659	-0.0025	0.0179	0.7506	0.01694	0.71055	0.00309	0.12973	0	0.081	0	3.39659	0.98717	0.79883	0.0975469
ctx-lh-superiortemporal	2.80587	0.16728	2.7956	0.17093	-0.01027	-0.36657	0.03246	1.15891	0.00593	0.21159	-0.069	0.062	-2.46364	2.21371	-0.013	0.0274	0.97832	0.01964	0.7014	0.00359	0.12806	0.001	0.069	0.0357	2.46364	0.98036	0.09381	1.02774
ctx-lh-supramarginal	2.58227	0.14273	2.5805	0.14821	-0.00177	-0.06844	0.03281	1.27117	0.00599	0.23208	-0.056	0.1	-2.16938	3.8739	-0.0005	0.02437	0.94394	0.02158	0.83604	0.00394	0.15264	0.001	0.1	0.03874	3.8739	0.97533	0.77018	0.113407
ctx-lh-temporalpole	3.598	0.33676	3.54987	0.34105	-0.04813	-1.34679	0.1442	4.03472	0.02633	0.73664	-0.449	0.218	-12.5632	6.09972	-0.0165	0.10967	3.06851	0.10367	2.90084	0.01893	0.52962	0.002	0.449	0.05596	12.5632	0.90276	0.07781	1.10897
ctx-lh-transversetemporal	2.32283	0.19238	2.32577	0.16841	0.00293	0.1262	0.06969	2.99817	0.01272	0.54739	-0.123	0.247	-5.29191	10.6268	0.008	0.04913	2.1139	0.04866	2.09352	0.00888	0.38222	0.001	0.247	0.04302	10.6268	0.92797	0.81928	0.0865679
ctx-rh-bankssts	2.54843	0.19294	2.5322	0.17703	-0.01623	-0.63903	0.05634	2.21769	0.01029	0.40489	-0.141	0.086	-5.55049	3.3854	-0.02	0.0479	1.88559	0.03275	1.28938	0.00598	0.23541	0.002	0.141	0.07872	5.55049	0.95147	0.12535	0.901869
ctx-rh-caudalanteriorcingulate	2.6255	0.22358	2.6483	0.2303	0.0228	0.86465	0.07396	2.80469	0.0135	0.51206	-0.152	0.153	-5.76434	5.80226	0.0275	0.06053	2.29562	0.04708	1.78552	0.0086	0.32599	0	0.153	0	5.80226	0.94373	0.10203	0.991273
ctx-rh-caudalmiddlefrontal	2.68603	0.15263	2.67347	0.1532	-0.01257	-0.46895	0.0248	0.92559	0.00453	0.16899	-0.074	0.044	-2.76146	1.64194	-0.0125	0.02223	0.82968	0.01635	0.61001	0.00298	0.11137	0.001	0.074	0.03731	2.76146	0.98393	0.00956	2.01954
ctx-rh-cuneus	1.92053	0.12506	1.92453	0.12126	0.004	0.20806	0.02832	1.47285	0.00517	0.2689	-0.054	0.05	-2.80879	2.60074	0.001	0.02153	1.12005	0.0184	0.95723	0.00336	0.17477	0	0.054	0	2.80879	0.97393	0.44535	0.351296
ctx-rh-entorhinal	3.403	0.49295	3.39563	0.51548	-0.00737	-0.21671	0.1424	4.18899	0.026	0.7648	-0.191	0.359	-5.61878	10.561	-0.032	0.11383	3.34871	0.08324	2.44861	0.0152	0.44705	0.002	0.359	0.05883	10.561	0.96134	0.77892	0.108508
ctx-rh-frontalpole	2.8609	0.27345	2.88443	0.2955	0.02353	0.81922	0.10572	3.68034	0.0193	0.67194	-0.29	0.256	-10.0952	8.91158	0.018	0.0778	2.70828	0.07409	2.57904	0.01353	0.47087	0.008	0.29	0.27848	10.0952	0.92996	0.2326	0.633397
ctx-rh-fusiform	2.59027	0.22041	2.5838	0.22118	-0.00647	-0.24997	0.05722	2.21163	0.01045	0.40379	-0.092	0.172	-3.5562	6.64854	-0.0125	0.044	1.70079	0.03625	1.40126	0.00662	0.25583	0.003	0.172	0.11596	6.64854	0.9671	0.54071	0.26703
ctx-rh-inferiorparietal	2.57083	0.15738	2.5667	0.15734	-0.00413	-0.16091	0.02595	1.01039	0.00474	0.18447	-0.045	0.056	-1.75182	2.18003	-0.006	0.0218	0.84866	0.01413	0.55011	0.00258	0.10044	0.001	0.056	0.03893	2.18003	0.98651	0.39023	0.40868
ctx-rh-inferiortemporal	2.61543	0.23476	2.60243	0.23284	-0.013	-0.49829	0.05	1.91652	0.00913	0.34991	-0.094	0.128	-3.60301	4.90622	-0.018	0.04253	1.6303	0.02834	1.08645	0.00518	0.19836	0.005	0.128	0.19164	4.90622	0.97636	0.1651	0.782247
ctx-rh-insula	3.03393	0.16959	3.0208	0.16283	-0.01313	-0.43382	0.04351	1.43708	0.00794	0.26237	-0.121	0.073	-3.99687	2.41134	-0.019	0.03713	1.22659	0.02539	0.83874	0.00464	0.15313	0	0.121	0	3.99687	0.96381	0.10903	0.96247
ctx-rh-isthmuscingulate	2.58083	0.24182	2.657	0.21481	0.07617	2.90833	0.07371	2.8146	0.01346	0.51387	-0.094	0.219	-3.58927	8.36224	0.0685	0.0835	3.18834	0.06498	2.48112	0.01186	0.45299	0.001	0.219	0.03819	8.36224	0.89711	0	5.39221
ctx-rh-lateraloccipital	2.2593	0.12795	2.26307	0.1282	0.00377	0.16658	0.03353	1.48267	0.00612	0.2707	-0.052	0.094	-2.29968	4.15711	-0.004	0.0255	1.12773	0.02159	0.95466	0.00394	0.1743	0	0.094	0	4.15711	0.96644	0.54311	0.265115
ctx-rh-lateralorbitofrontal	2.63823	0.15593	2.6423	0.16486	0.00407	0.15402	0.04353	1.64862	0.00795	0.301	-0.074	0.103	-2.80274	3.90112	-0.002	0.03527	1.33572	0.025	0.947	0.00456	0.1729	0.001	0.103	0.03787	3.90112	0.96409	0.61272	0.212735
ctx-rh-lingual	1.96307	0.11499	1.96603	0.10796	0.00297	0.15101	0.03977	2.0244	0.00726	0.3696	-0.071	0.139	-3.61405	7.07541	-0.002	0.0285	1.45071	0.0274	1.39451	0.005	0.2546	0	0.139	0	7.07541	0.93813	0.68585	0.163768
ctx-rh-medialorbitofrontal	2.47797	0.14598	2.4853	0.1568	0.00733	0.2955	0.0464	1.86984	0.00847	0.34138	-0.093	0.095	-3.74754	3.82813	0.0025	0.0368	1.48289	0.02842	1.14535	0.00519	0.20911	0	0.095	0	3.82813	0.95347	0.39381	0.40471
ctx-rh-middletemporal	2.7493	0.17423	2.74193	0.17133	-0.00737	-0.26831	0.05251	1.91245	0.00959	0.34916	-0.098	0.157	-3.56933	5.71821	-0.0245	0.04217	1.53578	0.03121	1.13665	0.0057	0.20752	0	0.157	0	5.71821	0.95444	0.44845	0.348287
ctx-rh-paracentral	2.5043	0.20045	2.50917	0.1955	0.00487	0.19414	0.03425	1.36649	0.00625	0.24949	-0.053	0.083	-2.1143	3.31108	-0.0015	0.02753	1.09838	0.02034	0.81134	0.00371	0.14813	0.002	0.083	0.07979	3.31108	0.98523	0.44277	0.353824
ctx-rh-parahippocampal	2.54343	0.31204	2.56767	0.3064	0.02423	0.94826	0.2049	8.01766	0.03741	1.46382	-0.182	1.029	-7.12175	40.2653	0.0055	0.09697	3.79436	0.18128	7.09362	0.0331	1.29511	0.003	1.029	0.11739	40.2653	0.78428	0.52221	0.282157
ctx-rh-parsopercularis	2.69173	0.1691	2.69163	0.1654	-0.0001	-0.00372	0.02478	0.92065	0.00452	0.16809	-0.055	0.045	-2.04333	1.67182	-0.003	0.0195	0.72446	0.01486	0.55197	0.00271	0.10078	0.001	0.055	0.03715	2.04333	0.98939	0.98251	0.00766095
ctx-rh-parsorbitalis	2.7806	0.19788	2.78607	0.19018	0.00547	0.19641	0.05431	1.95135	0.00992	0.35627	-0.086	0.179	-3.08982	6.43113	0.002	0.03933	1.41317	0.03715	1.33481	0.00678	0.2437	0.002	0.179	0.07186	6.43113	0.96173	0.58566	0.232356
ctx-rh-parstriangularis	2.60667	0.17016	2.60193	0.16614	-0.00473	-0.18175	0.03377	1.29662	0.00617	0.23673	-0.072	0.073	-2.76465	2.80306	-0.004	0.0266	1.02139	0.02077	0.79762	0.00379	0.14562	0.001	0.073	0.0384	2.80306	0.98011	0.44884	0.347905
ctx-rh-pericalcarine	1.6621	0.1235	1.6646	0.1259	0.0025	0.1503	0.03623	2.17801	0.00661	0.39765	-0.064	0.091	-3.84765	5.47089	-0.0015	0.02843	1.7094	0.02197	1.32072	0.00401	0.24113	0.001	0.091	0.06012	5.47089	0.95898	0.70821	0.14984
ctx-rh-postcentral	2.21897	0.13156	2.2195	0.13159	0.00053	0.02403	0.03123	1.40733	0.0057	0.25694	-0.048	0.091	-2.16291	4.10052	-0.0005	0.0236	1.06343	0.01999	0.90072	0.00365	0.16445	0.001	0.091	0.04506	4.10052	0.97275	0.92612	0.0333321
ctx-rh-posteriorcingulate	2.6751	0.16374	2.72247	0.16011	0.04737	1.75511	0.04007	1.48459	0.00731	0.27105	-0.048	0.119	-1.77858	4.40939	0.059	0.05403	2.00214	0.0301	1.11529	0.0055	0.20362	0.006	0.119	0.22232	4.40939	0.92911	0	6.37962
ctx-rh-precentral	2.61487	0.14981	2.61077	0.14487	-0.0041	-0.15692	0.01621	0.62059	0.00296	0.1133	-0.04	0.028	-1.53091	1.07164	-0.0025	0.01297	0.49627	0.01031	0.39474	0.00188	0.07207	0.001	0.04	0.03827	1.53091	0.99376	0.17664	0.752919
ctx-rh-precuneus	2.49413	0.17107	2.4896	0.17101	-0.00453	-0.18193	0.02226	0.89324	0.00406	0.16308	-0.044	0.037	-1.76575	1.48483	-0.011	0.01993	0.79994	0.01028	0.41249	0.00188	0.07531	0.003	0.044	0.12039	1.76575	0.99146	0.27378	0.562607
ctx-rh-rostralanteriorcingulate	2.8982	0.24055	2.91747	0.24895	0.01927	0.66258	0.0654	2.24919	0.01194	0.41064	-0.143	0.158	-4.91775	5.4336	0.0105	0.05133	1.76535	0.04399	1.51297	0.00803	0.27623	0.004	0.158	0.13756	5.4336	0.96243	0.11746	0.930094
ctx-rh-rostralmiddlefrontal	2.476	0.11829	2.46667	0.12464	-0.00933	-0.37766	0.03254	1.3167	0.00594	0.2404	-0.061	0.064	-2.46831	2.5897	-0.014	0.02807	1.13569	0.01828	0.73958	0.00334	0.13503	0.003	0.064	0.12139	2.5897	0.96242	0.12703	0.896102
ctx-rh-superiorfrontal	2.84557	0.15353	2.84307	0.15643	-0.0025	-0.0879	0.02953	1.03827	0.00539	0.18956	-0.043	0.083	-1.51179	2.9181	-0.008	0.02297	0.80746	0.01825	0.6415	0.00333	0.11712	0.001	0.083	0.03516	2.9181	0.98232	0.64634	0.189539
ctx-rh-superiorparietal	2.3967	0.17011	2.3927	0.16939	-0.004	-0.16704	0.02208	0.9219	0.00403	0.16831	-0.061	0.056	-2.54729	2.3385	-0.008	0.01713	0.71547	0.01415	0.59094	0.00258	0.10789	0	0.061	0	2.54729	0.99155	0.32921	0.482527
ctx-rh-superiortemporal	2.82693	0.19325	2.82157	0.18985	-0.00537	-0.19002	0.0425	1.50473	0.00776	0.27473	-0.087	0.085	-3.08046	3.00965	-0.008	0.03437	1.21684	0.02478	0.87739	0.00452	0.16019	0.002	0.087	0.07081	3.08046	0.97581	0.49464	0.305709
ctx-rh-supramarginal	2.65517	0.1658	2.65373	0.16567	-0.00143	-0.054	0.02846	1.0723	0.0052	0.19577	-0.061	0.074	-2.29802	2.78777	-0.001	0.02143	0.80745	0.01836	0.69166	0.00335	0.12628	0	0.074	0	2.78777	0.9857	0.78465	0.105325
ctx-rh-temporalpole	3.59113	0.4943	3.59997	0.505	0.00883	0.24567	0.17276	4.80469	0.03154	0.87721	-0.352	0.486	-9.78988	13.5167	0.015	0.12197	3.39216	0.12057	3.35321	0.02201	0.61221	0.01	0.486	0.27812	13.5167	0.94202	0.78142	0.107114
ctx-rh-transversetemporal	2.33407	0.21742	2.32667	0.2236	-0.0074	-0.31755	0.08123	3.48559	0.01483	0.63638	-0.153	0.233	-6.5655	9.99842	-0.0185	0.05767	2.47457	0.0567	2.4329	0.01035	0.44418	0	0.233	0	9.99842	0.93381	0.62155	0.206524
v5.0.0
Struct	Mean1	sd1	Mean2	sd2	Mean diff	Mean diff %	sd Diff	sd Diff %	se Diff	se Diff %	min Diff	max Diff	min Diff %	max Diff %	median	Mean AbsDiff	Mean AbsDiff %	sd AbsDiff	sd AbsDiff %	se AbsDiff	se AbsDiff %	min AbsDiff	max AbsDiff	min AbsDiff %	max AbsDiff %	ICC(1,1)	p	-log10(p)
ctx-lh-bankssts	2.36224	0.12801	2.35666	0.1469	-0.00559	-0.23676	0.05451	2.31017	0.01012	0.42899	-0.168	0.097	-7.12031	4.11113	0	0.03779	1.60178	0.03904	1.65457	0.00725	0.30725	0	0.168	0	7.12031	0.92355	0.5854	0.232552
ctx-lh-caudalanteriorcingulate	2.67369	0.1787	2.67986	0.19309	0.00617	0.23059	0.0522	1.95027	0.00969	0.36216	-0.119	0.106	-4.44565	3.95999	0	0.04017	1.50078	0.03306	1.23525	0.00614	0.22938	0	0.119	0	4.44565	0.96142	0.52948	0.27615
ctx-lh-caudalmiddlefrontal	2.64559	0.14057	2.65279	0.14253	0.00721	0.27204	0.02571	0.97061	0.00477	0.18024	-0.059	0.046	-2.22709	1.73638	0.012	0.02121	0.80051	0.01579	0.59585	0.00293	0.11065	0	0.059	0	2.22709	0.98278	0.14241	0.846462
ctx-lh-cuneus	1.89862	0.11056	1.90128	0.11484	0.00266	0.13975	0.03343	1.75971	0.00621	0.32677	-0.052	0.124	-2.73691	6.5265	0.001	0.02183	1.14885	0.02513	1.32281	0.00467	0.24564	0	0.124	0	6.5265	0.95723	0.67216	0.172528
ctx-lh-entorhinal	3.20076	0.43433	3.22038	0.42776	0.01962	0.61113	0.10564	3.29047	0.01962	0.61102	-0.136	0.32	-4.23601	9.96708	-0.007	0.07528	2.34463	0.07543	2.34955	0.01401	0.4363	0.005	0.32	0.15574	9.96708	0.96997	0.32579	0.487057
ctx-lh-frontalpole	2.86169	0.33073	2.87479	0.33749	0.0131	0.45685	0.09683	3.37587	0.01798	0.62688	-0.187	0.227	-6.51968	7.91426	0.002	0.06966	2.4285	0.06729	2.34615	0.0125	0.43567	0	0.227	0	7.91426	0.95867	0.4722	0.325873
ctx-lh-fusiform	2.4961	0.17823	2.49369	0.17811	-0.00241	-0.09675	0.04107	1.64609	0.00763	0.30567	-0.09	0.118	-3.60736	4.72966	-0.003	0.02945	1.18034	0.02819	1.12976	0.00523	0.20979	0	0.118	0	4.72966	0.97425	0.75396	0.122649
ctx-lh-inferiorparietal	2.49731	0.1226	2.49966	0.13329	0.00234	0.09385	0.03063	1.22606	0.00569	0.22767	-0.049	0.056	-1.96119	2.24136	0	0.02483	0.99371	0.01748	0.69974	0.00325	0.12994	0	0.056	0	2.24136	0.97219	0.68332	0.165375
ctx-lh-inferiortemporal	2.57828	0.17702	2.57645	0.18041	-0.00183	-0.07091	0.0342	1.32706	0.00635	0.24643	-0.057	0.058	-2.21157	2.25037	-0.003	0.02831	1.09842	0.01853	0.71881	0.00344	0.13348	0.003	0.058	0.1164	2.25037	0.98226	0.77566	0.110328
ctx-lh-insula	2.975	0.13774	2.96662	0.1738	-0.00838	-0.28206	0.09528	3.20707	0.01769	0.59554	-0.365	0.158	-12.2862	5.31841	-0.008	0.06328	2.12992	0.07073	2.381	0.01314	0.44214	0	0.365	0	12.2862	0.81991	0.63945	0.194195
ctx-lh-isthmuscingulate	2.53559	0.24177	2.53355	0.24219	-0.00203	-0.08027	0.06435	2.5388	0.01195	0.47144	-0.117	0.146	-4.61617	5.76035	-0.005	0.04852	1.91422	0.04131	1.63005	0.00767	0.30269	0.005	0.146	0.19727	5.76035	0.96581	0.86603	0.0624689
ctx-lh-lateraloccipital	2.19076	0.09068	2.19652	0.08987	0.00576	0.26251	0.01943	0.88594	0.00361	0.16451	-0.035	0.033	-1.59552	1.50435	0.009	0.01741	0.79383	0.0099	0.4512	0.00184	0.08379	0.001	0.035	0.04558	1.59552	0.97561	0.12178	0.914416
ctx-lh-lateralorbitofrontal	2.63824	0.16105	2.63841	0.16659	0.00017	0.00654	0.03687	1.39757	0.00685	0.25952	-0.086	0.078	-3.25964	2.95642	-0.001	0.02976	1.12793	0.02103	0.79722	0.00391	0.14804	0.001	0.086	0.0379	3.25964	0.97554	0.98009	0.00873366
ctx-lh-lingual	1.94248	0.09711	1.94938	0.09491	0.0069	0.35441	0.03089	1.58722	0.00574	0.29474	-0.042	0.089	-2.15835	4.57364	0.005	0.02428	1.24752	0.01982	1.01856	0.00368	0.18914	0.002	0.089	0.10278	4.57364	0.94748	0.23926	0.621128
ctx-lh-medialorbitofrontal	2.45931	0.11821	2.48976	0.15312	0.03045	1.23047	0.06853	2.76934	0.01273	0.51425	-0.12	0.179	-4.84939	7.23368	0.028	0.06003	2.42609	0.04386	1.77235	0.00814	0.32912	0.001	0.179	0.04041	7.23368	0.85553	0.02367	1.62572
ctx-lh-middletemporal	2.72031	0.14409	2.72348	0.15193	0.00317	0.11655	0.04042	1.48493	0.00751	0.27575	-0.07	0.08	-2.57173	2.93912	0.003	0.032	1.17565	0.02416	0.88746	0.00449	0.1648	0.001	0.08	0.03674	2.93912	0.96378	0.67576	0.170209
ctx-lh-paracentral	2.45493	0.14624	2.47021	0.14728	0.01528	0.62032	0.03428	1.39218	0.00637	0.25852	-0.027	0.114	-1.09641	4.62932	0.013	0.02555	1.03761	0.02722	1.10528	0.00505	0.20524	0.002	0.114	0.08122	4.62932	0.96831	0.02332	1.63236
ctx-lh-parahippocampal	2.61952	0.2997	2.60741	0.30331	-0.0121	-0.46312	0.07359	2.8159	0.01367	0.5229	-0.208	0.097	-7.95878	3.71155	0.009	0.05321	2.03588	0.05134	1.96434	0.00953	0.36477	0.004	0.208	0.15305	7.95878	0.97043	0.38334	0.416419
ctx-lh-parsopercularis	2.62366	0.13848	2.6281	0.147	0.00445	0.1694	0.03971	1.5124	0.00737	0.28085	-0.066	0.12	-2.51344	4.56989	0	0.02852	1.08601	0.02748	1.04668	0.0051	0.19436	0	0.12	0	4.56989	0.96216	0.55124	0.258657
ctx-lh-parsorbitalis	2.73993	0.22086	2.73772	0.23739	-0.00221	-0.08058	0.05679	2.07361	0.01055	0.38506	-0.168	0.134	-6.13401	4.89261	0	0.0409	1.49321	0.03871	1.41324	0.00719	0.26243	0	0.168	0	6.13401	0.97032	0.83576	0.0779211
ctx-lh-parstriangularis	2.57834	0.19856	2.56617	0.19762	-0.01217	-0.47322	0.03829	1.48855	0.00711	0.27642	-0.104	0.04	-4.04314	1.55505	-0.009	0.03203	1.24538	0.02359	0.91725	0.00438	0.17033	0.007	0.104	0.27213	4.04314	0.98009	0.09796	1.00897
ctx-lh-pericalcarine	1.66955	0.12	1.68155	0.1147	0.012	0.71618	0.03305	1.9724	0.00614	0.36627	-0.047	0.099	-2.80504	5.9085	0.008	0.0251	1.49822	0.02426	1.44803	0.00451	0.26889	0.002	0.099	0.11936	5.9085	0.95659	0.06059	1.21761
ctx-lh-postcentral	2.20855	0.13821	2.2081	0.13615	-0.00045	-0.0203	0.01678	0.75991	0.00312	0.14111	-0.052	0.035	-2.35473	1.58491	-0.001	0.01183	0.53559	0.0117	0.5299	0.00217	0.0984	0	0.052	0	2.35473	0.99277	0.88664	0.05225
ctx-lh-posteriorcingulate	2.6881	0.16216	2.69259	0.16246	0.00448	0.16662	0.04111	1.52793	0.00763	0.28373	-0.082	0.109	-3.04794	4.05152	-0.001	0.03138	1.16637	0.02628	0.9769	0.00488	0.18141	0.001	0.109	0.03718	4.05152	0.96864	0.56174	0.250466
ctx-lh-precentral	2.60779	0.14469	2.605	0.15561	-0.00279	-0.10716	0.02786	1.06875	0.00517	0.19846	-0.117	0.041	-4.48895	1.57306	0.002	0.01666	0.63901	0.02229	0.85511	0.00414	0.15879	0	0.117	0	4.48895	0.98323	0.59349	0.226584
ctx-lh-precuneus	2.43545	0.17355	2.43524	0.18144	-0.00021	-0.0085	0.02503	1.02798	0.00465	0.19089	-0.048	0.075	-1.97098	3.07964	-0.003	0.01834	0.75327	0.01668	0.68493	0.0031	0.12719	0.001	0.075	0.04106	3.07964	0.9904	0.96482	0.0155521
ctx-lh-rostralanteriorcingulate	2.81907	0.19836	2.8101	0.19667	-0.00897	-0.31854	0.08359	2.96982	0.01552	0.55148	-0.239	0.248	-8.49147	8.81124	-0.005	0.05931	2.10725	0.05854	2.07986	0.01087	0.38622	0.004	0.248	0.14211	8.81124	0.91242	0.56815	0.245537
ctx-lh-rostralmiddlefrontal	2.46655	0.12106	2.4649	0.12779	-0.00166	-0.06713	0.02341	0.94929	0.00435	0.17628	-0.068	0.039	-2.7578	1.58169	0	0.01772	0.71882	0.01501	0.60881	0.00279	0.11305	0	0.068	0	2.7578	0.98284	0.70622	0.151061
ctx-lh-superiorfrontal	2.85597	0.15355	2.85659	0.16047	0.00062	0.02173	0.02334	0.81703	0.00433	0.15172	-0.053	0.042	-1.85556	1.47045	0.001	0.01869	0.65434	0.01354	0.4739	0.00251	0.088	0.001	0.053	0.03502	1.85556	0.98933	0.88713	0.0520111
ctx-lh-superiorparietal	2.35321	0.15228	2.35186	0.15374	-0.00134	-0.05716	0.01489	0.63297	0.00277	0.11754	-0.042	0.028	-1.78531	1.1902	-0.001	0.01086	0.46172	0.01007	0.42806	0.00187	0.07949	0	0.042	0	1.78531	0.99539	0.63051	0.20031
ctx-lh-superiortemporal	2.79552	0.14302	2.78717	0.15257	-0.00834	-0.29895	0.03235	1.15878	0.00601	0.21518	-0.085	0.06	-3.04512	2.14951	-0.005	0.02421	0.86721	0.02262	0.8102	0.0042	0.15045	0	0.085	0	3.04512	0.97532	0.17569	0.75526
ctx-lh-supramarginal	2.57014	0.14297	2.56934	0.14722	-0.00079	-0.03086	0.0268	1.0428	0.00498	0.19364	-0.057	0.064	-2.21813	2.49052	-0.001	0.02128	0.82794	0.01581	0.61519	0.00294	0.11424	0	0.064	0	2.49052	0.98352	0.87452	0.0582345
ctx-lh-temporalpole	3.59545	0.26215	3.60848	0.27925	0.01303	0.36187	0.07644	2.1223	0.0142	0.3941	-0.169	0.189	-4.69188	5.24713	0.002	0.0589	1.63512	0.04926	1.36772	0.00915	0.25398	0.002	0.189	0.05552	5.24713	0.96038	0.36635	0.43611
ctx-lh-transversetemporal	2.34038	0.19126	2.34631	0.20099	0.00593	0.2531	0.1032	4.40403	0.01916	0.81781	-0.266	0.272	-11.3513	11.6073	0.015	0.07131	3.0431	0.07362	3.14176	0.01367	0.58341	0.002	0.272	0.08535	11.6073	0.86566	0.75924	0.119618
ctx-rh-bankssts	2.53859	0.19096	2.53162	0.18398	-0.00697	-0.27476	0.04397	1.73439	0.00816	0.32207	-0.101	0.104	-3.98405	4.1024	-0.003	0.0329	1.29764	0.02937	1.15858	0.00545	0.21514	0.001	0.104	0.03945	4.1024	0.97276	0.40083	0.397036
ctx-rh-caudalanteriorcingulate	2.59859	0.20607	2.58441	0.21185	-0.01417	-0.54688	0.05401	2.08409	0.01003	0.38701	-0.112	0.122	-4.32182	4.7077	-0.02	0.04562	1.7604	0.03114	1.20147	0.00578	0.22311	0.004	0.122	0.15435	4.7077	0.96548	0.16864	0.773027
ctx-rh-caudalmiddlefrontal	2.64445	0.14569	2.64834	0.14457	0.0039	0.14724	0.02566	0.96953	0.00476	0.18004	-0.053	0.051	-2.00273	1.92714	0.006	0.02038	0.77008	0.01562	0.59012	0.0029	0.10958	0.004	0.053	0.15115	2.00273	0.98455	0.42036	0.376381
ctx-rh-cuneus	1.90593	0.08817	1.90124	0.10105	-0.00469	-0.24636	0.03094	1.6256	0.00575	0.30187	-0.072	0.048	-3.78234	2.52155	-0.004	0.02559	1.3441	0.01739	0.9134	0.00323	0.16961	0.002	0.072	0.10506	3.78234	0.94736	0.42132	0.375387
ctx-rh-entorhinal	3.37152	0.4899	3.41241	0.4695	0.0409	1.20569	0.15752	4.64383	0.02925	0.86234	-0.29	0.38	-8.54961	11.2029	0.016	0.12179	3.59064	0.10574	3.11732	0.01964	0.57887	0.003	0.38	0.08844	11.2029	0.94439	0.17304	0.761848
ctx-rh-frontalpole	2.81024	0.2766	2.80452	0.27959	-0.00572	-0.2039	0.0687	2.44711	0.01276	0.45442	-0.128	0.132	-4.55941	4.7019	-0.03	0.0591	2.10529	0.0337	1.20036	0.00626	0.2229	0.017	0.132	0.60555	4.7019	0.97032	0.6571	0.182365
ctx-rh-fusiform	2.54362	0.17866	2.553	0.18813	0.00938	0.36806	0.04673	1.83384	0.00868	0.34054	-0.123	0.08	-4.82672	3.13933	0.019	0.03621	1.42082	0.03029	1.18847	0.00562	0.22069	0.002	0.123	0.07849	4.82672	0.96737	0.289	0.539103
ctx-rh-inferiorparietal	2.54576	0.13562	2.54669	0.13943	0.00093	0.03657	0.01901	0.74679	0.00353	0.13868	-0.041	0.039	-1.61023	1.53168	0.002	0.01472	0.57827	0.01174	0.46123	0.00218	0.08565	0	0.041	0	1.61023	0.99075	0.79396	0.1002
ctx-rh-inferiortemporal	2.62569	0.19242	2.63034	0.18751	0.00466	0.17714	0.03432	1.30578	0.00637	0.24248	-0.093	0.057	-3.5388	2.16894	0.012	0.02783	1.05888	0.01995	0.75913	0.0037	0.14097	0.003	0.093	0.11416	3.5388	0.98395	0.47114	0.326854
ctx-rh-insula	2.90945	0.16132	2.9091	0.15147	-0.00034	-0.01185	0.07483	2.57215	0.0139	0.47764	-0.115	0.282	-3.95287	9.69314	-0.02	0.04986	1.7139	0.055	1.89043	0.01021	0.35104	0.003	0.282	0.10312	9.69314	0.88937	0.98038	0.00860337
ctx-rh-isthmuscingulate	2.49217	0.23761	2.48455	0.23645	-0.00762	-0.30625	0.08051	3.23527	0.01495	0.60077	-0.145	0.241	-5.82713	9.68508	0.007	0.06003	2.41261	0.05299	2.12968	0.00984	0.39547	0.002	0.241	0.08038	9.68508	0.94375	0.61421	0.211684
ctx-rh-lateraloccipital	2.25772	0.11125	2.25741	0.11041	-0.00031	-0.01375	0.02839	1.25739	0.00527	0.23349	-0.053	0.038	-2.34766	1.68322	0.005	0.02362	1.04629	0.0151	0.66889	0.0028	0.12421	0.003	0.053	0.13289	2.34766	0.96831	0.95347	0.0206941
ctx-rh-lateralorbitofrontal	2.56614	0.15219	2.56693	0.15195	0.00079	0.0309	0.04572	1.78139	0.00849	0.3308	-0.098	0.098	-3.81838	3.81837	-0.005	0.03403	1.32609	0.02985	1.1632	0.00554	0.216	0.002	0.098	0.07792	3.81838	0.95632	0.92624	0.03328
ctx-rh-lingual	1.95279	0.08973	1.96193	0.08519	0.00914	0.46685	0.01855	0.94763	0.00344	0.17597	-0.028	0.053	-1.43049	2.70772	0.008	0.01583	0.80862	0.01308	0.66823	0.00243	0.12409	0	0.053	0	2.70772	0.97291	0.013	1.88619
ctx-rh-medialorbitofrontal	2.44424	0.14603	2.44341	0.1546	-0.00083	-0.03386	0.05171	2.11575	0.0096	0.39288	-0.095	0.133	-3.88735	5.44228	-0.015	0.04103	1.67911	0.0305	1.24799	0.00566	0.23175	0.003	0.133	0.12276	5.44228	0.94285	0.93193	0.0306178
ctx-rh-middletemporal	2.73993	0.15474	2.73866	0.15498	-0.00128	-0.04658	0.02352	0.85857	0.00437	0.15943	-0.045	0.039	-1.64276	1.42373	0.001	0.01872	0.68354	0.01385	0.50545	0.00257	0.09386	0	0.045	0	1.64276	0.98883	0.77233	0.112196
ctx-rh-paracentral	2.48248	0.18234	2.5039	0.18033	0.02141	0.85889	0.04289	1.72025	0.00796	0.31944	-0.073	0.127	-2.92797	5.09387	0.017	0.03769	1.5117	0.02904	1.16465	0.00539	0.21627	0.004	0.127	0.16043	5.09387	0.96612	0.01194	1.92286
ctx-rh-parahippocampal	2.55262	0.30752	2.55762	0.2849	0.005	0.19569	0.09772	3.82462	0.01815	0.71021	-0.181	0.236	-7.08381	9.23636	0.011	0.07721	3.02165	0.05833	2.28275	0.01083	0.4239	0.011	0.236	0.4305	9.23636	0.94734	0.78493	0.105169
ctx-rh-parsopercularis	2.64776	0.16394	2.64369	0.16477	-0.00407	-0.15379	0.02861	1.0813	0.00531	0.20079	-0.055	0.05	-2.07883	1.88984	-0.009	0.02441	0.92276	0.01477	0.55839	0.00274	0.10369	0.003	0.055	0.11339	2.07883	0.98507	0.45012	0.346667
ctx-rh-parsorbitalis	2.75983	0.21084	2.74521	0.21205	-0.01462	-0.53118	0.05025	1.82569	0.00933	0.33902	-0.16	0.061	-5.81286	2.21615	-0.011	0.03979	1.4457	0.03327	1.20859	0.00618	0.22443	0.001	0.16	0.03634	5.81286	0.97036	0.1284	0.891442
ctx-rh-parstriangularis	2.56414	0.15166	2.56145	0.15822	-0.00269	-0.10495	0.02844	1.10955	0.00528	0.20604	-0.059	0.068	-2.30218	2.65335	-0.004	0.02138	0.83422	0.01851	0.72231	0.00344	0.13413	0.001	0.068	0.03903	2.65335	0.98359	0.61448	0.211488
ctx-rh-pericalcarine	1.64486	0.08665	1.65786	0.08999	0.013	0.78723	0.05292	3.20473	0.00983	0.5951	-0.058	0.183	-3.51225	11.0818	0.011	0.03741	2.26563	0.03906	2.36554	0.00725	0.43927	0.001	0.183	0.06055	11.0818	0.81634	0.19659	0.706436
ctx-rh-postcentral	2.18838	0.1193	2.19176	0.12006	0.00338	0.1543	0.02368	1.08104	0.0044	0.20074	-0.037	0.099	-1.68944	4.5204	0.001	0.01393	0.6361	0.01927	0.8799	0.00358	0.16339	0.001	0.099	0.04566	4.5204	0.98071	0.44854	0.3482
ctx-rh-posteriorcingulate	2.62438	0.17621	2.63248	0.17104	0.0081	0.3083	0.04248	1.6161	0.00789	0.3001	-0.102	0.089	-3.88064	3.38605	0.013	0.03252	1.23714	0.02788	1.06068	0.00518	0.19696	0	0.102	0	3.88064	0.97002	0.31306	0.504368
ctx-rh-precentral	2.59279	0.142	2.596	0.14187	0.00321	0.12361	0.02765	1.06591	0.00514	0.19793	-0.086	0.076	-3.31484	2.92939	0.004	0.01838	0.70842	0.02063	0.79511	0.00383	0.14765	0	0.086	0	3.31484	0.98141	0.53736	0.269732
ctx-rh-precuneus	2.47614	0.16993	2.47603	0.16817	-0.0001	-0.00418	0.01883	0.76058	0.0035	0.14124	-0.047	0.03	-1.89815	1.21159	0	0.01383	0.55845	0.01252	0.50547	0.00232	0.09386	0	0.047	0	1.89815	0.99401	0.9766	0.0102798
ctx-rh-rostralanteriorcingulate	2.81297	0.23138	2.80179	0.24134	-0.01117	-0.39797	0.06864	2.44485	0.01275	0.454	-0.106	0.198	-3.77576	7.05284	-0.013	0.05138	1.83015	0.04589	1.6347	0.00852	0.30356	0.001	0.198	0.03562	7.05284	0.95819	0.38817	0.410977
ctx-rh-rostralmiddlefrontal	2.43721	0.10932	2.43245	0.11218	-0.00476	-0.19544	0.02088	0.8577	0.00388	0.15927	-0.051	0.05	-2.09461	2.05353	-0.004	0.016	0.65713	0.01394	0.57268	0.00259	0.10634	0	0.051	0	2.09461	0.98192	0.23	0.638265
ctx-rh-superiorfrontal	2.81179	0.1524	2.80462	0.15483	-0.00717	-0.25541	0.02321	0.82635	0.00431	0.15345	-0.079	0.029	-2.81318	1.03269	-0.008	0.018	0.64098	0.01601	0.57	0.00297	0.10585	0.001	0.079	0.03561	2.81318	0.9879	0.10718	0.969901
ctx-rh-superiorparietal	2.37048	0.15921	2.36838	0.15682	-0.0021	-0.08877	0.01456	0.61444	0.0027	0.1141	-0.032	0.039	-1.35054	1.64597	-0.004	0.01121	0.47298	0.0093	0.39242	0.00173	0.07287	0	0.039	0	1.64597	0.99581	0.44307	0.353529
ctx-rh-superiortemporal	2.82076	0.18747	2.81466	0.19353	-0.0061	-0.21661	0.03457	1.22678	0.00642	0.22781	-0.111	0.044	-3.93938	1.56156	0	0.02486	0.88235	0.02436	0.86443	0.00452	0.16052	0	0.111	0	3.93938	0.9836	0.34982	0.456161
ctx-rh-supramarginal	2.63086	0.15793	2.63252	0.16305	0.00166	0.06289	0.02153	0.81809	0.004	0.15191	-0.05	0.041	-1.89992	1.55793	0	0.01752	0.66563	0.01219	0.46312	0.00226	0.086	0	0.05	0	1.89992	0.99126	0.68202	0.166204
ctx-rh-temporalpole	3.70166	0.36913	3.67134	0.33248	-0.03031	-0.8222	0.17023	4.61766	0.03161	0.85748	-0.474	0.476	-12.8577	12.912	-0.045	0.11783	3.19619	0.1247	3.38267	0.02316	0.62815	0.001	0.476	0.02712	12.912	0.88289	0.34584	0.461125
ctx-rh-transversetemporal	2.36959	0.25103	2.38834	0.24736	0.01876	0.78852	0.07668	3.22333	0.01424	0.59856	-0.132	0.269	-5.54863	11.3074	0.017	0.05903	2.48152	0.05133	2.15777	0.00953	0.40069	0.004	0.269	0.16814	11.3074	0.95148	0.19839	0.702471
